# Supplementary material for: Colouration mechanism of chrysoprase: insights from colourimetry, spectroscopy and mineralogy
Source: Royal Society of Chemistry journal article supplement (doi:10.1039/d5ra05339k), 2025-01-01
Supplement: d5ra05339k1.zip [file near-infrared_spectrum.xlsx]

## Sheet: Sheet1
	10	9	8	7	6	5	4	3	2	1	d10	d9	d8	d7	d6	d5	d4	d3	d2	d1	10	9	8	7	6	5	4	3	2	1
3999.64	0.12689	0.08627	0.13185	0.05447	0.04516	0.05057	0.03749	0.10354	0.02984	0.05773	0.111	0.11	0.115	0.092	0.086	0.071	0.062	0.084	0.083	0.104	2.63268	1.80618	2.64044	1.36353	1.20934	1.64032	1.39257	2.83872	0.82797	1.27839
4001.57	0.12599	0.08555	0.13081	0.05404	0.04479	0.05019	0.03714	0.10232	0.0296	0.0572	0.111	0.11	0.115	0.092	0.086	0.071	0.062	0.084	0.083	0.104	2.61401	1.79111	2.61961	1.35276	1.19943	1.62799	1.37957	2.80527	0.821311	1.26665
4003.5	0.12502	0.08482	0.12972	0.05362	0.04438	0.04978	0.03679	0.10115	0.02931	0.05668	0.111	0.11	0.115	0.092	0.086	0.071	0.062	0.084	0.083	0.104	2.59388	1.77582	2.59778	1.34225	1.18846	1.61469	1.36657	2.7732	0.813264	1.25513
4005.43	0.12403	0.0841	0.12857	0.05318	0.04396	0.04935	0.03645	0.1	0.02898	0.0561	0.111	0.11	0.115	0.092	0.086	0.071	0.062	0.084	0.083	0.104	2.57334	1.76075	2.57475	1.33123	1.17721	1.60075	1.35394	2.74167	0.804108	1.24229
4007.35	0.12306	0.08336	0.12742	0.05273	0.04356	0.04891	0.03609	0.09884	0.0287	0.05547	0.111	0.11	0.115	0.092	0.086	0.071	0.062	0.084	0.083	0.104	2.55322	1.74526	2.55172	1.31997	1.1665	1.58648	1.34057	2.70986	0.796339	1.22834
4009.28	0.12204	0.08258	0.12627	0.05226	0.04318	0.04847	0.03574	0.09761	0.02848	0.05486	0.111	0.11	0.115	0.092	0.086	0.071	0.062	0.084	0.083	0.104	2.53206	1.72892	2.52869	1.3082	1.15632	1.5722	1.32757	2.67614	0.790234	1.21483
4011.21	0.12097	0.08177	0.12508	0.05178	0.04281	0.04806	0.03541	0.09634	0.02824	0.05432	0.111	0.11	0.115	0.092	0.086	0.071	0.062	0.084	0.083	0.104	2.50986	1.71197	2.50486	1.29619	1.14641	1.5589	1.31531	2.64132	0.783575	1.20287
4013.14	0.11988	0.08095	0.12383	0.05124	0.0424	0.04764	0.03505	0.09512	0.02793	0.05378	0.111	0.11	0.115	0.092	0.086	0.071	0.062	0.084	0.083	0.104	2.48724	1.6948	2.47983	1.28267	1.13543	1.54528	1.30194	2.60787	0.774973	1.19092
4015.07	0.11882	0.08014	0.12255	0.0507	0.04195	0.04717	0.0347	0.09394	0.0276	0.0532	0.111	0.11	0.115	0.092	0.086	0.071	0.062	0.084	0.083	0.104	2.46525	1.67784	2.4542	1.26915	1.12338	1.53004	1.28894	2.57552	0.765817	1.17807
4017	0.11778	0.07931	0.12127	0.05018	0.0415	0.04667	0.03433	0.09276	0.02728	0.0526	0.111	0.11	0.115	0.092	0.086	0.071	0.062	0.084	0.083	0.104	2.44367	1.66046	2.42856	1.25614	1.11133	1.51382	1.27519	2.54317	0.756938	1.16479
4018.93	0.11677	0.07841	0.12001	0.04972	0.04109	0.04617	0.03388	0.09155	0.02695	0.05202	0.111	0.11	0.115	0.092	0.086	0.071	0.062	0.084	0.083	0.104	2.42271	1.64162	2.40333	1.24462	1.10035	1.4976	1.25848	2.51	0.747781	1.15194
4020.85	0.11572	0.07752	0.11877	0.04925	0.04067	0.04567	0.03345	0.09031	0.02661	0.05144	0.111	0.11	0.115	0.092	0.086	0.071	0.062	0.084	0.083	0.104	2.40093	1.62299	2.3785	1.23286	1.0891	1.48138	1.24251	2.476	0.738347	1.1391
4022.78	0.11464	0.07669	0.11755	0.04877	0.04021	0.04516	0.0331	0.08908	0.02628	0.05085	0.111	0.11	0.115	0.092	0.086	0.071	0.062	0.084	0.083	0.104	2.37852	1.60561	2.35407	1.22084	1.07679	1.46484	1.2295	2.44228	0.729191	1.12603
4024.71	0.11366	0.0759	0.11634	0.0483	0.03979	0.04468	0.03278	0.08786	0.02599	0.05022	0.111	0.11	0.115	0.092	0.086	0.071	0.062	0.084	0.083	0.104	2.35819	1.58907	2.32983	1.20907	1.06554	1.44927	1.21762	2.40883	0.721144	1.11208
4026.64	0.11277	0.07514	0.11517	0.04781	0.03941	0.04426	0.03242	0.08656	0.02573	0.04954	0.111	0.11	0.115	0.092	0.086	0.071	0.062	0.084	0.083	0.104	2.33972	1.57316	2.3064	1.19681	1.05536	1.43564	1.20425	2.37319	0.71393	1.09703
4028.57	0.11188	0.0744	0.11405	0.04734	0.03904	0.04386	0.03203	0.08519	0.02545	0.04888	0.111	0.11	0.115	0.092	0.086	0.071	0.062	0.084	0.083	0.104	2.32126	1.55767	2.28398	1.18504	1.04545	1.42267	1.18976	2.33563	0.706161	1.08241
4030.5	0.11103	0.07365	0.113	0.04696	0.03872	0.04352	0.0317	0.08384	0.02521	0.04832	0.111	0.11	0.115	0.092	0.086	0.071	0.062	0.084	0.083	0.104	2.30362	1.54196	2.26295	1.17553	1.03689	1.41164	1.1775	2.29861	0.699502	1.07001
4032.42	0.1102	0.07285	0.11197	0.04661	0.03845	0.04319	0.03141	0.08257	0.025	0.04781	0.111	0.11	0.115	0.092	0.086	0.071	0.062	0.084	0.083	0.104	2.2864	1.52521	2.24232	1.16677	1.02966	1.40094	1.16673	2.26379	0.693675	1.05872
4034.35	0.10923	0.07199	0.11081	0.04618	0.03813	0.04278	0.03106	0.08122	0.02475	0.04721	0.111	0.11	0.115	0.092	0.086	0.071	0.062	0.084	0.083	0.104	2.26628	1.50721	2.21909	1.15601	1.02109	1.38764	1.15373	2.22678	0.686738	1.04543
4036.28	0.10807	0.07101	0.10945	0.0456	0.03769	0.04224	0.03056	0.0798	0.02441	0.0465	0.111	0.11	0.115	0.092	0.086	0.071	0.062	0.084	0.083	0.104	2.24221	1.48669	2.19186	1.14149	1.0093	1.37012	1.13516	2.18785	0.677304	1.02971
4038.21	0.10679	0.06995	0.10794	0.04495	0.03712	0.04162	0.03003	0.07839	0.02402	0.04574	0.111	0.11	0.115	0.092	0.086	0.071	0.062	0.084	0.083	0.104	2.21565	1.4645	2.16162	1.12522	0.994039	1.35001	1.11547	2.14919	0.666483	1.01288
4040.14	0.1054	0.06884	0.1063	0.04425	0.03647	0.04094	0.02949	0.07705	0.02355	0.04492	0.111	0.11	0.115	0.092	0.086	0.071	0.062	0.084	0.083	0.104	2.18681	1.44126	2.12877	1.10769	0.976633	1.32796	1.09541	2.11245	0.653442	0.994719
4042.07	0.10403	0.06773	0.10463	0.04356	0.03581	0.04028	0.02895	0.07578	0.02306	0.04406	0.111	0.11	0.115	0.092	0.086	0.071	0.062	0.084	0.083	0.104	2.15839	1.41802	2.09533	1.09042	0.958958	1.30655	1.07535	2.07763	0.639846	0.975675
4043.99	0.1028	0.06663	0.10303	0.04289	0.03526	0.03965	0.02841	0.07449	0.02264	0.04321	0.111	0.11	0.115	0.092	0.086	0.071	0.062	0.084	0.083	0.104	2.13287	1.39499	2.06329	1.07365	0.94423	1.28611	1.05529	2.04227	0.628192	0.956852
4045.92	0.10166	0.0656	0.10156	0.0423	0.03482	0.03909	0.02793	0.07315	0.02234	0.04242	0.111	0.11	0.115	0.092	0.086	0.071	0.062	0.084	0.083	0.104	2.10922	1.37343	2.03385	1.05888	0.932447	1.26795	1.03746	2.00553	0.619868	0.939358
4047.85	0.10054	0.06465	0.1002	0.04179	0.03443	0.03857	0.02751	0.07182	0.02209	0.04168	0.111	0.11	0.115	0.092	0.086	0.071	0.062	0.084	0.083	0.104	2.08598	1.35354	2.00661	1.04611	0.922003	1.25108	1.02186	1.96906	0.612931	0.922972
4049.78	0.09945	0.06375	0.09897	0.04134	0.03404	0.03811	0.02709	0.07058	0.02181	0.04094	0.111	0.11	0.115	0.092	0.086	0.071	0.062	0.084	0.083	0.104	2.06336	1.33469	1.98198	1.03485	0.91156	1.23616	1.00626	1.93507	0.605162	0.906585
4051.71	0.09837	0.06283	0.0978	0.04093	0.03365	0.03768	0.02667	0.06937	0.02149	0.04018	0.111	0.11	0.115	0.092	0.086	0.071	0.062	0.084	0.083	0.104	2.04096	1.31543	1.95855	1.02458	0.901116	1.22221	0.990661	1.90189	0.596283	0.889755
4053.64	0.0971	0.06183	0.09647	0.04046	0.03322	0.03719	0.02621	0.06815	0.02112	0.03939	0.111	0.11	0.115	0.092	0.086	0.071	0.062	0.084	0.083	0.104	2.01461	1.2945	1.93192	1.01282	0.889601	1.20632	0.973575	1.86845	0.586016	0.872261
4055.57	0.09558	0.06072	0.09485	0.03986	0.03271	0.03661	0.02569	0.06698	0.02069	0.03858	0.111	0.11	0.115	0.092	0.086	0.071	0.062	0.084	0.083	0.104	1.98307	1.27126	1.89947	0.9978	0.875943	1.1875	0.954259	1.83637	0.574085	0.854324
4057.49	0.09383	0.05953	0.09296	0.03908	0.03212	0.03593	0.02512	0.06588	0.02024	0.03773	0.111	0.11	0.115	0.092	0.086	0.071	0.062	0.084	0.083	0.104	1.94676	1.24634	1.86163	0.978274	0.860144	1.16545	0.933086	1.80621	0.561599	0.835502
4059.42	0.09195	0.05821	0.0909	0.03821	0.03144	0.03517	0.02453	0.0648	0.0198	0.03686	0.111	0.11	0.115	0.092	0.086	0.071	0.062	0.084	0.083	0.104	1.90776	1.21871	1.82037	0.956496	0.841934	1.1408	0.911171	1.7766	0.54939	0.816236
4061.35	0.08999	0.0568	0.08878	0.03732	0.03069	0.03434	0.02391	0.06373	0.01934	0.03598	0.111	0.11	0.115	0.092	0.086	0.071	0.062	0.084	0.083	0.104	1.86709	1.18919	1.77792	0.934217	0.82185	1.11387	0.888141	1.74726	0.536627	0.796749
4063.28	0.08794	0.05536	0.08662	0.03644	0.02995	0.03349	0.02327	0.06269	0.01884	0.03512	0.111	0.11	0.115	0.092	0.086	0.071	0.062	0.084	0.083	0.104	1.82456	1.15904	1.73466	0.912188	0.802033	1.0863	0.864368	1.71875	0.522753	0.777705
4065.21	0.08586	0.05389	0.08446	0.03558	0.0292	0.03264	0.02266	0.06168	0.01835	0.03423	0.111	0.11	0.115	0.092	0.086	0.071	0.062	0.084	0.083	0.104	1.7814	1.12826	1.6914	0.89066	0.781949	1.05873	0.841709	1.69106	0.509157	0.757997
4067.14	0.08372	0.05241	0.08228	0.03471	0.0284	0.03179	0.02206	0.06065	0.01788	0.03332	0.111	0.11	0.115	0.092	0.086	0.071	0.062	0.084	0.083	0.104	1.737	1.09727	1.64775	0.868882	0.760526	1.03116	0.819422	1.66282	0.496116	0.737846
4069.07	0.08151	0.05091	0.08009	0.0338	0.02759	0.03094	0.02146	0.05959	0.01738	0.03242	0.111	0.11	0.115	0.092	0.086	0.071	0.062	0.084	0.083	0.104	1.69115	1.06587	1.60389	0.846102	0.738835	1.00359	0.797135	1.63376	0.482243	0.717916
4070.99	0.07923	0.04939	0.07787	0.03284	0.0268	0.03007	0.02087	0.05853	0.01685	0.03152	0.111	0.11	0.115	0.092	0.086	0.071	0.062	0.084	0.083	0.104	1.64384	1.03405	1.55943	0.822071	0.717679	0.975369	0.77522	1.6047	0.467537	0.697986
4072.92	0.07692	0.04787	0.07563	0.03189	0.02601	0.0292	0.02026	0.0575	0.01631	0.0306	0.111	0.11	0.115	0.092	0.086	0.071	0.062	0.084	0.083	0.104	1.59592	1.00222	1.51457	0.79829	0.696524	0.947149	0.752561	1.57646	0.452553	0.677613
4074.85	0.0746	0.04637	0.07335	0.03094	0.02521	0.02833	0.01962	0.05649	0.01578	0.02967	0.111	0.11	0.115	0.092	0.086	0.071	0.062	0.084	0.083	0.104	1.54778	0.970819	1.46891	0.774509	0.6751	0.918929	0.728788	1.54877	0.437847	0.657019
4076.78	0.07223	0.04488	0.07099	0.02994	0.02442	0.02746	0.01898	0.05547	0.01524	0.02874	0.111	0.11	0.115	0.092	0.086	0.071	0.062	0.084	0.083	0.104	1.49861	0.939624	1.42165	0.749476	0.653945	0.89071	0.705015	1.5208	0.422864	0.636425
4078.71	0.06988	0.04338	0.06859	0.02893	0.02365	0.02657	0.01832	0.0545	0.01476	0.02784	0.111	0.11	0.115	0.092	0.086	0.071	0.062	0.084	0.083	0.104	1.44985	0.908219	1.37359	0.724193	0.633325	0.861841	0.680499	1.49421	0.409546	0.616495
4080.64	0.06757	0.04189	0.06625	0.02798	0.02288	0.02568	0.01765	0.05354	0.01438	0.02698	0.111	0.11	0.115	0.092	0.086	0.071	0.062	0.084	0.083	0.104	1.40193	0.877024	1.32673	0.700412	0.612705	0.832972	0.655612	1.46789	0.399002	0.597451
4082.56	0.06524	0.04042	0.06398	0.02703	0.02205	0.02477	0.01698	0.05257	0.01395	0.02613	0.111	0.11	0.115	0.092	0.086	0.071	0.062	0.084	0.083	0.104	1.35358	0.846248	1.28127	0.676631	0.590478	0.803455	0.630725	1.44129	0.38707	0.578629
4084.49	0.06289	0.03894	0.0617	0.02603	0.02118	0.02386	0.01631	0.05156	0.01342	0.02523	0.111	0.11	0.115	0.092	0.086	0.071	0.062	0.084	0.083	0.104	1.30483	0.815262	1.23561	0.651599	0.567181	0.773938	0.605838	1.4136	0.372365	0.558699
4086.42	0.06062	0.03748	0.05948	0.02505	0.02035	0.02303	0.0157	0.0505	0.01288	0.02431	0.111	0.11	0.115	0.092	0.086	0.071	0.062	0.084	0.083	0.104	1.25773	0.784695	1.19115	0.627067	0.544954	0.747015	0.583179	1.38454	0.357381	0.538326
4088.35	0.05847	0.03611	0.05734	0.02414	0.01958	0.02226	0.01513	0.04941	0.01241	0.02339	0.111	0.11	0.115	0.092	0.086	0.071	0.062	0.084	0.083	0.104	1.21312	0.756012	1.1483	0.604287	0.524334	0.722039	0.562006	1.35466	0.34434	0.517954
4090.28	0.05638	0.03479	0.0553	0.02327	0.01888	0.02147	0.01455	0.04836	0.01197	0.0225	0.111	0.11	0.115	0.092	0.086	0.071	0.062	0.084	0.083	0.104	1.16976	0.728376	1.10744	0.582509	0.505589	0.696414	0.540462	1.32587	0.332131	0.498245
4092.21	0.05436	0.03353	0.05334	0.02246	0.01822	0.02069	0.01398	0.04735	0.01154	0.02166	0.111	0.11	0.115	0.092	0.086	0.071	0.062	0.084	0.083	0.104	1.12785	0.701996	1.06819	0.562232	0.487915	0.671114	0.519289	1.29818	0.3202	0.479644
4094.14	0.05244	0.03236	0.0515	0.02169	0.01761	0.01995	0.01346	0.0464	0.01115	0.02091	0.111	0.11	0.115	0.092	0.086	0.071	0.062	0.084	0.083	0.104	1.08801	0.677501	1.03134	0.542957	0.471579	0.647111	0.499974	1.27213	0.309379	0.463036
4096.06	0.05064	0.03124	0.04977	0.02097	0.01703	0.01929	0.01297	0.0455	0.01079	0.0202	0.111	0.11	0.115	0.092	0.086	0.071	0.062	0.084	0.083	0.104	1.05067	0.654052	0.996698	0.524934	0.456048	0.625702	0.481773	1.24746	0.29939	0.447313
4097.99	0.04894	0.03016	0.04816	0.02028	0.0165	0.01868	0.01251	0.04455	0.01045	0.01948	0.111	0.11	0.115	0.092	0.086	0.071	0.062	0.084	0.083	0.104	1.01539	0.631441	0.964456	0.507661	0.441855	0.605916	0.464686	1.22141	0.289956	0.43137
4099.92	0.04731	0.02913	0.04666	0.01966	0.01599	0.01811	0.01207	0.04358	0.01014	0.01874	0.111	0.11	0.115	0.092	0.086	0.071	0.062	0.084	0.083	0.104	0.981576	0.609876	0.934417	0.492141	0.428197	0.587427	0.448342	1.19482	0.281354	0.414983
4101.85	0.04575	0.02818	0.04525	0.01908	0.01547	0.01756	0.01167	0.04262	0.00981	0.01805	0.111	0.11	0.115	0.092	0.086	0.071	0.062	0.084	0.083	0.104	0.949209	0.589987	0.90618	0.477622	0.414272	0.569587	0.433484	1.1685	0.272198	0.399703
4103.78	0.04434	0.02732	0.04396	0.01854	0.01501	0.01707	0.0113	0.04174	0.00948	0.01741	0.111	0.11	0.115	0.092	0.086	0.071	0.062	0.084	0.083	0.104	0.919955	0.571981	0.880347	0.464105	0.401954	0.553693	0.41974	1.14437	0.263041	0.385531
4105.71	0.04315	0.02652	0.04284	0.01809	0.01466	0.01665	0.01097	0.04094	0.0092	0.01678	0.111	0.11	0.115	0.092	0.086	0.071	0.062	0.084	0.083	0.104	0.895265	0.555232	0.857918	0.45284	0.392581	0.54007	0.407482	1.12244	0.255272	0.37158
4107.63	0.04219	0.02582	0.0419	0.01776	0.01439	0.01632	0.01068	0.04019	0.00902	0.01617	0.111	0.11	0.115	0.092	0.086	0.071	0.062	0.084	0.083	0.104	0.875347	0.540577	0.839093	0.444579	0.385351	0.529366	0.39671	1.10188	0.250278	0.358072
4109.56	0.04145	0.02525	0.04121	0.01751	0.01419	0.0161	0.01041	0.03947	0.00887	0.01562	0.111	0.11	0.115	0.092	0.086	0.071	0.062	0.084	0.083	0.104	0.859994	0.528643	0.825275	0.438321	0.379995	0.52223	0.386681	1.08214	0.246116	0.345893
4111.49	0.04092	0.02483	0.04077	0.01735	0.01406	0.01601	0.01017	0.03882	0.00871	0.01511	0.111	0.11	0.115	0.092	0.086	0.071	0.062	0.084	0.083	0.104	0.848998	0.51985	0.816464	0.434316	0.376514	0.51931	0.377766	1.06431	0.241676	0.334599
4113.42	0.04063	0.02457	0.0406	0.01731	0.01402	0.01602	0.01002	0.03826	0.00857	0.01461	0.111	0.11	0.115	0.092	0.086	0.071	0.062	0.084	0.083	0.104	0.842981	0.514406	0.813059	0.433314	0.375443	0.519635	0.372195	1.04896	0.237792	0.323527
4115.35	0.04061	0.02443	0.04067	0.01737	0.0141	0.0161	0.00996	0.03781	0.0085	0.01415	0.111	0.11	0.115	0.092	0.086	0.071	0.062	0.084	0.083	0.104	0.842566	0.511475	0.814461	0.434816	0.377585	0.52223	0.369966	1.03662	0.235849	0.313341
4117.28	0.04072	0.02434	0.04085	0.01747	0.01422	0.0162	0.00992	0.03745	0.00848	0.01374	0.111	0.11	0.115	0.092	0.086	0.071	0.062	0.084	0.083	0.104	0.844848	0.509591	0.818066	0.43732	0.380798	0.525473	0.36848	1.02675	0.235294	0.304262
4119.2	0.04085	0.0242	0.04097	0.01755	0.01432	0.01629	0.00985	0.03714	0.00844	0.01339	0.111	0.11	0.115	0.092	0.086	0.071	0.062	0.084	0.083	0.104	0.847545	0.50666	0.820469	0.439322	0.383476	0.528393	0.36588	1.01825	0.234185	0.296511
4121.13	0.04084	0.02392	0.04089	0.01753	0.01434	0.0163	0.00972	0.03691	0.00836	0.01301	0.111	0.11	0.115	0.092	0.086	0.071	0.062	0.084	0.083	0.104	0.847338	0.500798	0.818867	0.438822	0.384012	0.528717	0.361051	1.01195	0.231965	0.288096
4123.06	0.04059	0.02349	0.0405	0.01741	0.01423	0.0162	0.0096	0.0367	0.00823	0.01259	0.111	0.11	0.115	0.092	0.086	0.071	0.062	0.084	0.083	0.104	0.842151	0.491795	0.811057	0.435818	0.381066	0.525473	0.356594	1.00619	0.228358	0.278796
4124.99	0.04008	0.02296	0.03975	0.0172	0.01401	0.01592	0.00944	0.0365	0.00805	0.01216	0.111	0.11	0.115	0.092	0.086	0.071	0.062	0.084	0.083	0.104	0.83157	0.480699	0.796037	0.430561	0.375175	0.516391	0.35065	1.00071	0.223363	0.269274
4126.92	0.03934	0.02236	0.03874	0.01686	0.01372	0.01558	0.00924	0.03629	0.00787	0.01172	0.111	0.11	0.115	0.092	0.086	0.071	0.062	0.084	0.083	0.104	0.816216	0.468137	0.775811	0.42205	0.367409	0.505363	0.343221	0.994951	0.218369	0.25953
4128.85	0.03844	0.02163	0.03758	0.01646	0.01337	0.01522	0.009	0.03613	0.00768	0.0113	0.111	0.11	0.115	0.092	0.086	0.071	0.062	0.084	0.083	0.104	0.797543	0.452854	0.75258	0.412037	0.358036	0.493685	0.334306	0.990564	0.213097	0.25023
4130.78	0.03738	0.02076	0.03632	0.01597	0.01294	0.01476	0.0087	0.03602	0.0074	0.01083	0.111	0.11	0.115	0.092	0.086	0.071	0.062	0.084	0.083	0.104	0.775551	0.434639	0.727347	0.399771	0.346521	0.478765	0.323163	0.987548	0.205328	0.239822
4132.7	0.03622	0.01981	0.03494	0.01541	0.01245	0.0142	0.00835	0.03592	0.00705	0.0103	0.111	0.11	0.115	0.092	0.086	0.071	0.062	0.084	0.083	0.104	0.751483	0.414749	0.699711	0.385752	0.333399	0.4606	0.310162	0.984807	0.195616	0.228086
4134.63	0.03511	0.01891	0.03359	0.01485	0.01199	0.01368	0.00798	0.03582	0.00673	0.0098	0.111	0.11	0.115	0.092	0.086	0.071	0.062	0.084	0.083	0.104	0.728453	0.395907	0.672676	0.371734	0.321081	0.443733	0.296418	0.982065	0.186737	0.217013
4136.56	0.03414	0.01813	0.03242	0.01439	0.01159	0.01325	0.00767	0.03569	0.00647	0.00938	0.111	0.11	0.115	0.092	0.086	0.071	0.062	0.084	0.083	0.104	0.708328	0.379576	0.649246	0.360219	0.310369	0.429785	0.284903	0.978501	0.179523	0.207713
4138.49	0.03334	0.01744	0.03151	0.01403	0.01128	0.0129	0.00743	0.03556	0.00624	0.00905	0.111	0.11	0.115	0.092	0.086	0.071	0.062	0.084	0.083	0.104	0.69173	0.36513	0.631022	0.351207	0.302068	0.418432	0.275989	0.974937	0.173141	0.200405
4140.42	0.03268	0.01686	0.03078	0.01373	0.01107	0.01262	0.00725	0.03545	0.00606	0.00876	0.111	0.11	0.115	0.092	0.086	0.071	0.062	0.084	0.083	0.104	0.678036	0.352987	0.616403	0.343698	0.296444	0.40935	0.269302	0.971921	0.168147	0.193983
4142.35	0.03211	0.01635	0.03018	0.01348	0.01094	0.01241	0.0071	0.03533	0.0059	0.00844	0.111	0.11	0.115	0.092	0.086	0.071	0.062	0.084	0.083	0.104	0.66621	0.34231	0.604387	0.33744	0.292963	0.402538	0.263731	0.968631	0.163707	0.186897
4144.27	0.03156	0.0159	0.02965	0.0133	0.01084	0.01224	0.00696	0.03519	0.00577	0.00809	0.111	0.11	0.115	0.092	0.086	0.071	0.062	0.084	0.083	0.104	0.654799	0.332888	0.593773	0.332934	0.290285	0.397024	0.25853	0.964792	0.1601	0.179147
4146.2	0.03093	0.01548	0.02912	0.01312	0.01067	0.01206	0.0068	0.03505	0.00566	0.00775	0.111	0.11	0.115	0.092	0.086	0.071	0.062	0.084	0.083	0.104	0.641728	0.324095	0.58316	0.328428	0.285733	0.391186	0.252587	0.960954	0.157048	0.171618
4148.13	0.03012	0.01498	0.02838	0.01285	0.01038	0.01179	0.00659	0.03491	0.00552	0.00742	0.111	0.11	0.115	0.092	0.086	0.071	0.062	0.084	0.083	0.104	0.624922	0.313627	0.56834	0.321669	0.277967	0.382428	0.244787	0.957116	0.153163	0.16431
4150.06	0.02904	0.01432	0.02732	0.01245	0.01	0.01139	0.00637	0.03474	0.00531	0.00704	0.111	0.11	0.115	0.092	0.086	0.071	0.062	0.084	0.083	0.104	0.602515	0.299809	0.547113	0.311656	0.267791	0.369453	0.236615	0.952455	0.147337	0.155895
4151.99	0.0276	0.01348	0.02592	0.01185	0.00957	0.01086	0.00607	0.03448	0.00503	0.00663	0.111	0.11	0.115	0.092	0.086	0.071	0.062	0.084	0.083	0.104	0.572638	0.282222	0.519076	0.296636	0.256276	0.352262	0.225471	0.945327	0.139567	0.146816
4153.92	0.02582	0.01249	0.02423	0.01109	0.00905	0.01021	0.00569	0.0341	0.0047	0.00624	0.111	0.11	0.115	0.092	0.086	0.071	0.062	0.084	0.083	0.104	0.535707	0.261495	0.485232	0.277612	0.242351	0.331178	0.211356	0.934908	0.130411	0.13818
4155.85	0.0238	0.01141	0.02228	0.01023	0.0084	0.00947	0.00523	0.03368	0.00433	0.00581	0.111	0.11	0.115	0.092	0.086	0.071	0.062	0.084	0.083	0.104	0.493796	0.238884	0.446181	0.256084	0.224944	0.307175	0.194269	0.923393	0.120144	0.128658
4157.77	0.02166	0.01029	0.02026	0.00933	0.00764	0.00872	0.00472	0.03322	0.00395	0.00534	0.111	0.11	0.115	0.092	0.086	0.071	0.062	0.084	0.083	0.104	0.449396	0.215435	0.405729	0.233554	0.204592	0.282847	0.175325	0.910782	0.109601	0.11825
4159.7	0.01951	0.00916	0.01825	0.00846	0.00686	0.00798	0.00424	0.03269	0.00361	0.00491	0.111	0.11	0.115	0.092	0.086	0.071	0.062	0.084	0.083	0.104	0.404789	0.191777	0.365476	0.211776	0.183704	0.258844	0.157495	0.896251	0.100167	0.108728
4161.63	0.01748	0.00808	0.01635	0.00762	0.00614	0.00725	0.00383	0.03204	0.00326	0.0045	0.111	0.11	0.115	0.092	0.086	0.071	0.062	0.084	0.083	0.104	0.362671	0.169166	0.327427	0.190748	0.164423	0.235165	0.142266	0.87843	0.0904552	0.099649
4163.56	0.01561	0.0071	0.01458	0.00682	0.0055	0.00656	0.00348	0.0313	0.00293	0.00408	0.111	0.11	0.115	0.092	0.086	0.071	0.062	0.084	0.083	0.104	0.323872	0.148648	0.29198	0.170722	0.147285	0.212784	0.129265	0.858142	0.0812987	0.0903485
4165.49	0.01388	0.00619	0.01297	0.00608	0.00492	0.00598	0.00316	0.03046	0.00266	0.00366	0.111	0.11	0.115	0.092	0.086	0.071	0.062	0.084	0.083	0.104	0.287979	0.129596	0.259738	0.152198	0.131753	0.193971	0.117379	0.835112	0.073807	0.0810479
4167.42	0.01226	0.00538	0.01152	0.00542	0.00441	0.00544	0.00284	0.02953	0.00243	0.00331	0.111	0.11	0.115	0.092	0.086	0.071	0.062	0.084	0.083	0.104	0.254367	0.112638	0.230701	0.135677	0.118096	0.176455	0.105492	0.809614	0.0674252	0.0732974
4169.35	0.01076	0.00466	0.01024	0.00482	0.00398	0.00495	0.00251	0.02857	0.0022	0.00304	0.111	0.11	0.115	0.092	0.086	0.071	0.062	0.084	0.083	0.104	0.223246	0.0975635	0.205067	0.120657	0.106581	0.160561	0.0932344	0.783294	0.0610434	0.0673185
4171.27	0.00944	0.004	0.00907	0.00429	0.00357	0.00451	0.00221	0.02762	0.00198	0.00283	0.111	0.11	0.115	0.092	0.086	0.071	0.062	0.084	0.083	0.104	0.195859	0.0837455	0.181637	0.10739	0.0956013	0.146289	0.0820908	0.757248	0.054939	0.0626682
4173.2	0.00829	0.00341	0.00798	0.0038	0.00319	0.00409	0.00194	0.02666	0.00178	0.00261	0.111	0.11	0.115	0.092	0.086	0.071	0.062	0.084	0.083	0.104	0.171999	0.071393	0.159808	0.0951239	0.0854252	0.132666	0.0720616	0.730928	0.0493896	0.0577964
4175.13	0.00723	0.0029	0.00695	0.00334	0.00287	0.00371	0.0017	0.02564	0.0016	0.00234	0.111	0.11	0.115	0.092	0.086	0.071	0.062	0.084	0.083	0.104	0.150006	0.0607155	0.139181	0.0836089	0.0768559	0.12034	0.0631468	0.702963	0.0443952	0.0518175
4177.06	0.00622	0.00245	0.00602	0.00294	0.00258	0.00337	0.00151	0.0246	0.00142	0.00206	0.111	0.11	0.115	0.092	0.086	0.071	0.062	0.084	0.083	0.104	0.129051	0.0512941	0.120557	0.0735959	0.06909	0.109311	0.0560892	0.67445	0.0394007	0.0456171
4178.99	0.0053	0.00204	0.00519	0.00259	0.00233	0.00306	0.00132	0.02358	0.00128	0.0018	0.111	0.11	0.115	0.092	0.086	0.071	0.062	0.084	0.083	0.104	0.109963	0.0427102	0.103935	0.0648345	0.0623952	0.0992561	0.0490316	0.646485	0.0355161	0.0398596
4180.92	0.00443	0.00163	0.00439	0.00223	0.00205	0.00274	0.00109	0.02255	0.00111	0.00156	0.111	0.11	0.115	0.092	0.086	0.071	0.062	0.084	0.083	0.104	0.0919125	0.0341263	0.0879145	0.0558227	0.0548971	0.0888763	0.0404882	0.618246	0.0307992	0.034545
4182.84	0.00357	0.00125	0.00362	0.00186	0.00177	0.00243	0.000874639	0.0215	0.000930145	0.00131	0.111	0.11	0.115	0.092	0.086	0.071	0.062	0.084	0.083	0.104	0.0740695	0.0261705	0.0724944	0.0465607	0.047399	0.078821	0.0324886	0.589458	0.0258087	0.0290089
4184.77	0.00272	0.000894502	0.00292	0.00149	0.0015	0.00215	0.000731885	0.02051	0.000768498	0.00108	0.111	0.11	0.115	0.092	0.086	0.071	0.062	0.084	0.083	0.104	0.0564339	0.0187276	0.0584762	0.0372986	0.0401686	0.0697387	0.027186	0.562316	0.0213235	0.0239158
4186.7	0.00198	0.000583246	0.00226	0.00118	0.00127	0.00192	0.000597283	0.01952	0.000633836	0.000883639	0.111	0.11	0.115	0.092	0.086	0.071	0.062	0.084	0.083	0.104	0.0410805	0.0122111	0.045259	0.0295385	0.0340094	0.0622783	0.0221862	0.535173	0.017587	0.0195675
4188.63	0.00136	0.000341073	0.00165	0.000913858	0.00109	0.00174	0.000435591	0.01846	0.000541374	0.0007395	0.111	0.11	0.115	0.092	0.086	0.071	0.062	0.084	0.083	0.104	0.0282169	0.00714083	0.033043	0.0228762	0.0291892	0.0564397	0.0161801	0.506112	0.0150215	0.0163757
4190.56	0.000810299	0.000151351	0.00112	0.000690386	0.000901729	0.00155	0.000245571	0.01739	0.000456929	0.000630438	0.111	0.11	0.115	0.092	0.086	0.071	0.062	0.084	0.083	0.104	0.0168119	0.00316874	0.0224292	0.0172822	0.0241475	0.0502768	0.00912177	0.476776	0.0126784	0.0139606
4192.49	0.000353009	-5.28097e-05	0.000712454	0.000518039	0.000733525	0.0014	7.81715e-05	0.01629	0.000368208	0.000546545	0.111	0.11	0.115	0.092	0.086	0.071	0.062	0.084	0.083	0.104	0.00732414	-0.00110564	0.0142677	0.0129679	0.0196431	0.0454113	0.00290369	0.446617	0.0102167	0.0121028
4194.41	1.47857e-05	-0.000233218	0.000391692	0.000372797	0.000583231	0.00127	-2.83122e-06	0.01516	0.000316829	0.000456542	0.111	0.11	0.115	0.092	0.086	0.071	0.062	0.084	0.083	0.104	0.00030677	-0.00488274	0.00784406	0.00933208	0.0156184	0.0411945	-0.000105166	0.415637	0.00879105	0.0101098
4196.34	-0.000221238	-0.000339523	0.000116795	0.000235245	0.000466764	0.00116	-3.76105e-05	0.01404	0.000264362	0.000371456	0.111	0.11	0.115	0.092	0.086	0.071	0.062	0.084	0.083	0.104	-0.00459019	-0.00710838	0.00233895	0.0058888	0.0124995	0.0376265	-0.00139705	0.38493	0.00733525	0.00822561
4198.27	-0.000422757	-0.000378639	-0.000106394	0.000143975	0.000405252	0.0011	-7.64877e-05	0.01291	0.000208855	0.000305429	0.111	0.11	0.115	0.092	0.086	0.071	0.062	0.084	0.083	0.104	-0.00877126	-0.00792732	-0.00213066	0.00360407	0.0108523	0.0356803	-0.00284115	0.353949	0.0057951	0.00676349
4200.2	-0.000541627	-0.000381753	-0.000234306	6.85751e-05	0.000415951	0.00111	-0.000110433	0.01183	0.00016132	0.000250369	0.111	0.11	0.115	0.092	0.086	0.071	0.062	0.084	0.083	0.104	-0.0112375	-0.00799252	-0.00469223	0.00171661	0.0111388	0.0360046	-0.00410205	0.324339	0.00447614	0.00554423
4202.13	-0.000531429	-0.000355959	-0.000285238	1.91629e-05	0.000467852	0.00114	-0.000125319	0.01083	0.000122741	0.000213265	0.111	0.11	0.115	0.092	0.086	0.071	0.062	0.084	0.083	0.104	-0.011026	-0.00745249	-0.0057122	0.000479697	0.0125286	0.0369777	-0.00465499	0.296922	0.00340569	0.00472259
4204.06	-0.000428095	-0.000292167	-0.000276387	1.84774e-06	0.000528961	0.00118	-0.000129283	0.0099	9.89288e-05	0.000196174	0.111	0.11	0.115	0.092	0.086	0.071	0.062	0.084	0.083	0.104	-0.00888201	-0.00611691	-0.00553495	4.62538e-05	0.0141651	0.0382752	-0.00480224	0.271425	0.00274498	0.00434412
4205.99	-0.000266785	-0.000185221	-0.000191539	-3.56138e-06	0.000562921	0.00124	-0.000114203	0.00899	0.000121221	0.000201181	0.111	0.11	0.115	0.092	0.086	0.071	0.062	0.084	0.083	0.104	-0.00553519	-0.00387785	-0.00383578	-8.91506e-05	0.0150745	0.0402214	-0.00424209	0.246476	0.00336352	0.004455
4207.91	-9.02526e-05	-8.59052e-05	-1.92821e-05	1.27256e-05	0.000586584	0.00126	-8.71122e-05	0.00806	0.000179663	0.00020808	0.111	0.11	0.115	0.092	0.086	0.071	0.062	0.084	0.083	0.104	-0.00187254	-0.00179854	-0.000386145	0.000318555	0.0157082	0.0408701	-0.0032358	0.220978	0.00498511	0.00460777
4209.84	0.000144294	2.92361e-05	0.000177115	8.32826e-05	0.000619218	0.00125	-5.10663e-05	0.00718	0.000253588	0.000230968	0.111	0.11	0.115	0.092	0.086	0.071	0.062	0.084	0.083	0.104	0.00299378	0.000612098	0.00354692	0.00208478	0.0165821	0.0405458	-0.00189687	0.196852	0.0070363	0.00511461
4211.77	0.000404719	0.000176117	0.000343382	0.000178054	0.000683904	0.00131	-2.864e-05	0.00642	0.000323713	0.000269935	0.111	0.11	0.115	0.092	0.086	0.071	0.062	0.084	0.083	0.104	0.00839701	0.00368725	0.0068766	0.00445716	0.0183143	0.042492	-0.00106384	0.176015	0.00898206	0.0059775
4213.7	0.000696635	0.000401303	0.000561625	0.000261501	0.000782788	0.00147	1.59293e-05	0.00576	0.000368908	0.000312924	0.111	0.11	0.115	0.092	0.086	0.071	0.062	0.084	0.083	0.104	0.0144536	0.00840183	0.0112472	0.00654605	0.0209623	0.0476818	0.000591696	0.15792	0.0102361	0.00692946
4215.63	0.00106	0.00066179	0.000826091	0.000373825	0.000875503	0.00163	6.66827e-05	0.00516	0.000372917	0.000355914	0.111	0.11	0.115	0.092	0.086	0.071	0.062	0.084	0.083	0.104	0.0219926	0.0138555	0.0165434	0.00935781	0.0234452	0.0528717	0.00247694	0.14147	0.0103473	0.00788144
4217.56	0.00151	0.000913993	0.00111	0.000535175	0.000990123	0.00174	9.60976e-05	0.00462	0.000352383	0.000393569	0.111	0.11	0.115	0.092	0.086	0.071	0.062	0.084	0.083	0.104	0.0313291	0.0191357	0.022229	0.0133968	0.0265146	0.0564397	0.00356956	0.126665	0.00977757	0.00871528
4219.48	0.00205	0.00119	0.00145	0.000740677	0.00114	0.00185	0.000144377	0.00417	0.00038676	0.000470072	0.111	0.11	0.115	0.092	0.086	0.071	0.062	0.084	0.083	0.104	0.0425329	0.0249143	0.0290378	0.0185411	0.0305281	0.0600077	0.00536291	0.114327	0.0107314	0.0104094
4221.41	0.00267	0.0015	0.00185	0.000974446	0.0013	0.002	0.000233829	0.00374	0.000487402	0.000612006	0.111	0.11	0.115	0.092	0.086	0.071	0.062	0.084	0.083	0.104	0.0553965	0.0314045	0.0370483	0.0243929	0.0348128	0.0648732	0.00868562	0.102538	0.0135239	0.0135524
4223.34	0.00335	0.00184	0.00232	0.0012	0.0015	0.00222	0.000343606	0.00334	0.000621453	0.00075914	0.111	0.11	0.115	0.092	0.086	0.071	0.062	0.084	0.083	0.104	0.069505	0.0385229	0.0464605	0.0300391	0.0401686	0.0720093	0.0127633	0.0915717	0.0172434	0.0168106
4225.27	0.00405	0.00219	0.00287	0.0014	0.00172	0.00244	0.000426114	0.00296	0.000734523	0.000885084	0.111	0.11	0.115	0.092	0.086	0.071	0.062	0.084	0.083	0.104	0.0840284	0.0458506	0.0574749	0.0350457	0.04606	0.0791454	0.0158281	0.0811533	0.0203808	0.0195995
4227.2	0.00481	0.0026	0.00347	0.00163	0.00194	0.00268	0.0005164	0.00259	0.000820264	0.00102	0.111	0.11	0.115	0.092	0.086	0.071	0.062	0.084	0.083	0.104	0.0997967	0.0544345	0.0694905	0.0408032	0.0519514	0.0869301	0.0191818	0.0710092	0.0227599	0.0225871
4229.13	0.00566	0.00304	0.00411	0.00193	0.00218	0.00296	0.000644743	0.00228	0.000929073	0.00115	0.111	0.11	0.115	0.092	0.086	0.071	0.062	0.084	0.083	0.104	0.117432	0.0636465	0.0823072	0.0483129	0.0583784	0.0960124	0.0239491	0.06251	0.025779	0.0254659
4231.06	0.00657	0.00348	0.00478	0.00225	0.00243	0.00323	0.000799298	0.00202	0.00105	0.00127	0.111	0.11	0.115	0.092	0.086	0.071	0.062	0.084	0.083	0.104	0.136313	0.0728585	0.0957247	0.0563234	0.0650731	0.10477	0.0296901	0.0553817	0.0291343	0.0281232
4232.98	0.00749	0.00396	0.00551	0.00256	0.00269	0.00352	0.000957832	0.00182	0.00115	0.0014	0.111	0.11	0.115	0.092	0.086	0.071	0.062	0.084	0.083	0.104	0.155401	0.082908	0.110344	0.0640835	0.0720357	0.114177	0.0355788	0.0498983	0.031909	0.0310019
4234.91	0.00846	0.00448	0.00628	0.00288	0.00298	0.00384	0.00112	0.00167	0.00126	0.0016	0.111	0.11	0.115	0.092	0.086	0.071	0.062	0.084	0.083	0.104	0.175526	0.0937949	0.125764	0.0720939	0.0798016	0.124557	0.0416026	0.0457858	0.0349612	0.0354308
4236.84	0.00951	0.00504	0.0071	0.00325	0.00331	0.00419	0.00125	0.00159	0.0014	0.00184	0.111	0.11	0.115	0.092	0.086	0.071	0.062	0.084	0.083	0.104	0.197311	0.105519	0.142185	0.081356	0.0886387	0.135909	0.0464315	0.0435925	0.0388458	0.0407454
4238.77	0.01067	0.00564	0.00797	0.00368	0.00366	0.00456	0.00139	0.00155	0.00158	0.00209	0.111	0.11	0.115	0.092	0.086	0.071	0.062	0.084	0.083	0.104	0.221378	0.118081	0.159608	0.09212	0.0980114	0.147911	0.0516318	0.0424958	0.0438402	0.0462814
4240.7	0.0119	0.00626	0.00888	0.00412	0.00401	0.00496	0.00161	0.00151	0.00176	0.00233	0.111	0.11	0.115	0.092	0.086	0.071	0.062	0.084	0.083	0.104	0.246898	0.131062	0.177832	0.103134	0.107384	0.160886	0.0598037	0.0413992	0.0488347	0.0515961
4242.63	0.01321	0.00694	0.00989	0.00459	0.00437	0.0054	0.00191	0.00146	0.00193	0.00259	0.111	0.11	0.115	0.092	0.086	0.071	0.062	0.084	0.083	0.104	0.274078	0.145298	0.198058	0.1149	0.117025	0.175158	0.0709473	0.0400283	0.0535517	0.0573536
4244.56	0.01466	0.00766	0.01099	0.00513	0.00476	0.00588	0.00219	0.00141	0.00212	0.00284	0.111	0.11	0.115	0.092	0.086	0.071	0.062	0.084	0.083	0.104	0.304162	0.160373	0.220087	0.128417	0.127468	0.190727	0.0813479	0.0386575	0.0588236	0.0628896
4246.48	0.01627	0.00842	0.01219	0.00573	0.00518	0.00639	0.00248	0.00134	0.00234	0.00308	0.111	0.11	0.115	0.092	0.086	0.071	0.062	0.084	0.083	0.104	0.337566	0.176284	0.244118	0.143437	0.138716	0.20727	0.09212	0.0367383	0.064928	0.0682042
4248.41	0.018	0.00922	0.01352	0.00636	0.00565	0.0069	0.00277	0.00127	0.00258	0.00336	0.111	0.11	0.115	0.092	0.086	0.071	0.062	0.084	0.083	0.104	0.373459	0.193033	0.270753	0.159207	0.151302	0.223813	0.102892	0.0348192	0.0715872	0.0744046
4250.34	0.01978	0.01009	0.015	0.00703	0.0062	0.00741	0.00307	0.00123	0.00283	0.00369	0.111	0.11	0.115	0.092	0.086	0.071	0.062	0.084	0.083	0.104	0.41039	0.211248	0.300391	0.175979	0.16603	0.240355	0.114036	0.0337225	0.078524	0.0817122
4252.27	0.02161	0.01102	0.01658	0.0077	0.00681	0.00797	0.00337	0.00125	0.00311	0.00403	0.111	0.11	0.115	0.092	0.086	0.071	0.062	0.084	0.083	0.104	0.448359	0.230719	0.332033	0.192751	0.182365	0.25852	0.125179	0.0342708	0.0862931	0.0892412
4254.2	0.02354	0.01199	0.01823	0.00835	0.00742	0.00861	0.00368	0.00134	0.00338	0.00439	0.111	0.11	0.115	0.092	0.086	0.071	0.062	0.084	0.083	0.104	0.488402	0.251027	0.365076	0.209022	0.198701	0.279279	0.136694	0.0367383	0.0937848	0.0972132
4256.13	0.02559	0.01301	0.01991	0.00904	0.00797	0.00931	0.004	0.00148	0.00363	0.00479	0.111	0.11	0.115	0.092	0.086	0.071	0.062	0.084	0.083	0.104	0.530935	0.272382	0.398719	0.226295	0.213429	0.301985	0.148581	0.0405767	0.100722	0.106071
4258.06	0.02776	0.01401	0.02159	0.00981	0.00855	0.00997	0.00431	0.00163	0.00389	0.00519	0.111	0.11	0.115	0.092	0.086	0.071	0.062	0.084	0.083	0.104	0.575957	0.293318	0.432363	0.24557	0.228961	0.323393	0.160096	0.0446892	0.107936	0.114929
4259.98	0.03001	0.01502	0.0233	0.01061	0.00916	0.01061	0.00463	0.00183	0.00416	0.00558	0.111	0.11	0.115	0.092	0.086	0.071	0.062	0.084	0.083	0.104	0.62264	0.314464	0.466608	0.265596	0.245296	0.344153	0.171982	0.0501725	0.115427	0.123565
4261.91	0.03234	0.01607	0.02509	0.01137	0.00978	0.01126	0.00497	0.00216	0.00443	0.00596	0.111	0.11	0.115	0.092	0.086	0.071	0.062	0.084	0.083	0.104	0.670982	0.336447	0.502455	0.284621	0.261899	0.365236	0.184611	0.05922	0.122919	0.13198
4263.84	0.03476	0.01719	0.02701	0.01212	0.01042	0.01192	0.00534	0.00261	0.00474	0.0064	0.111	0.11	0.115	0.092	0.086	0.071	0.062	0.084	0.083	0.104	0.721192	0.359896	0.540905	0.303395	0.279038	0.386645	0.198355	0.0715575	0.131521	0.141723
4265.77	0.03734	0.01836	0.02906	0.01293	0.01111	0.01264	0.00578	0.00319	0.00509	0.00689	0.111	0.11	0.115	0.092	0.086	0.071	0.062	0.084	0.083	0.104	0.774721	0.384392	0.581958	0.323672	0.297515	0.409999	0.214699	0.0874592	0.141232	0.152574
4267.7	0.04016	0.01966	0.03123	0.01386	0.01188	0.01347	0.00627	0.00393	0.00547	0.00742	0.111	0.11	0.115	0.092	0.086	0.071	0.062	0.084	0.083	0.104	0.83323	0.411609	0.625415	0.346952	0.318135	0.436921	0.2329	0.107748	0.151776	0.16431
4269.62	0.04325	0.02108	0.03357	0.01494	0.01274	0.01437	0.00676	0.00483	0.00588	0.00797	0.111	0.11	0.115	0.092	0.086	0.071	0.062	0.084	0.083	0.104	0.89734	0.441339	0.672276	0.373987	0.341165	0.466114	0.251101	0.132422	0.163152	0.17649
4271.55	0.04658	0.02255	0.03616	0.01616	0.01367	0.01534	0.00726	0.00586	0.00633	0.00854	0.111	0.11	0.115	0.092	0.086	0.071	0.062	0.084	0.083	0.104	0.96643	0.472115	0.724143	0.404527	0.36607	0.497578	0.269674	0.160662	0.175638	0.189112
4273.48	0.05011	0.02411	0.03909	0.01745	0.01469	0.01641	0.00784	0.00705	0.00683	0.00915	0.111	0.11	0.115	0.092	0.086	0.071	0.062	0.084	0.083	0.104	1.03967	0.504776	0.78282	0.436819	0.393385	0.532285	0.291218	0.193287	0.189512	0.20262
4275.41	0.0539	0.02583	0.04226	0.01882	0.01577	0.01758	0.00853	0.00847	0.00735	0.0098	0.111	0.11	0.115	0.092	0.086	0.071	0.062	0.084	0.083	0.104	1.1183	0.540786	0.846302	0.471114	0.422306	0.570236	0.316848	0.232219	0.20394	0.217013
4277.34	0.05797	0.0277	0.04565	0.02033	0.01693	0.01888	0.00929	0.01012	0.00792	0.01051	0.111	0.11	0.115	0.092	0.086	0.071	0.062	0.084	0.083	0.104	1.20275	0.579937	0.914191	0.508913	0.45337	0.612403	0.345079	0.277457	0.219756	0.232736
4279.27	0.06229	0.02968	0.04924	0.02194	0.01819	0.02029	0.01008	0.01201	0.00856	0.01129	0.111	0.11	0.115	0.092	0.086	0.071	0.062	0.084	0.083	0.104	1.29238	0.621391	0.986085	0.549215	0.487111	0.658139	0.374423	0.329274	0.237514	0.250008
4281.2	0.06681	0.03181	0.05306	0.02369	0.0196	0.02182	0.01093	0.01413	0.00926	0.01209	0.111	0.11	0.115	0.092	0.086	0.071	0.062	0.084	0.083	0.104	1.38616	0.665986	1.06258	0.593022	0.52487	0.707767	0.405997	0.387397	0.256937	0.267724
4283.12	0.07152	0.0341	0.05714	0.02555	0.02112	0.02345	0.01185	0.01641	0.01	0.01287	0.111	0.11	0.115	0.092	0.086	0.071	0.062	0.084	0.083	0.104	1.48388	0.71393	1.14429	0.639583	0.565574	0.760639	0.44017	0.449908	0.27747	0.284996
4285.05	0.07641	0.03647	0.06146	0.02752	0.02273	0.02515	0.01287	0.01882	0.01079	0.0137	0.111	0.11	0.115	0.092	0.086	0.071	0.062	0.084	0.083	0.104	1.58534	0.763549	1.2308	0.688897	0.608688	0.815781	0.478058	0.515982	0.29939	0.303376
4286.98	0.08145	0.0389	0.06596	0.02956	0.02441	0.02691	0.01396	0.02129	0.01162	0.01466	0.111	0.11	0.115	0.092	0.086	0.071	0.062	0.084	0.083	0.104	1.6899	0.814425	1.32092	0.739964	0.653677	0.872869	0.518546	0.583701	0.32242	0.324634
4288.91	0.08651	0.04138	0.0706	0.03163	0.02611	0.02874	0.0151	0.02365	0.01247	0.01569	0.111	0.11	0.115	0.092	0.086	0.071	0.062	0.084	0.083	0.104	1.79489	0.866347	1.41384	0.791781	0.699202	0.932228	0.560892	0.648404	0.346005	0.347443
4290.84	0.0914	0.04388	0.07529	0.03371	0.02782	0.03064	0.01629	0.0257	0.01331	0.01674	0.111	0.11	0.115	0.092	0.086	0.071	0.062	0.084	0.083	0.104	1.89634	0.918688	1.50776	0.843849	0.744994	0.993858	0.605095	0.704608	0.369312	0.370694
4292.77	0.09601	0.04626	0.07986	0.03579	0.02951	0.03249	0.01753	0.02723	0.01411	0.01777	0.111	0.11	0.115	0.092	0.086	0.071	0.062	0.084	0.083	0.104	1.99199	0.968516	1.59928	0.895917	0.79025	1.05387	0.651155	0.746556	0.39151	0.393503
4294.69	0.10022	0.0485	0.0842	0.03779	0.03112	0.03426	0.01871	0.02814	0.01491	0.01877	0.111	0.11	0.115	0.092	0.086	0.071	0.062	0.084	0.083	0.104	2.07934	1.01541	1.6862	0.945982	0.833365	1.11128	0.694986	0.771505	0.413708	0.415647
4296.62	0.10384	0.05052	0.08812	0.03956	0.03258	0.03583	0.01977	0.02844	0.01569	0.01974	0.111	0.11	0.115	0.092	0.086	0.071	0.062	0.084	0.083	0.104	2.15445	1.05771	1.7647	0.99029	0.872462	1.1622	0.73436	0.77973	0.43535	0.437127
4298.55	0.10668	0.05228	0.09145	0.04104	0.03383	0.03715	0.02066	0.02824	0.01638	0.02058	0.111	0.11	0.115	0.092	0.086	0.071	0.062	0.084	0.083	0.104	2.21337	1.09455	1.83139	1.02734	0.905936	1.20502	0.767419	0.774247	0.454496	0.455728
4300.48	0.10867	0.05371	0.09409	0.04218	0.03485	0.03817	0.02136	0.02769	0.01691	0.02125	0.111	0.11	0.115	0.092	0.086	0.071	0.062	0.084	0.083	0.104	2.25466	1.12449	1.88425	1.05588	0.933251	1.23811	0.793421	0.759167	0.469202	0.470565
4302.41	0.10982	0.05478	0.0959	0.04293	0.03558	0.03889	0.02183	0.02706	0.01731	0.02177	0.111	0.11	0.115	0.092	0.086	0.071	0.062	0.084	0.083	0.104	2.27852	1.14689	1.9205	1.07465	0.952799	1.26146	0.810879	0.741895	0.4803	0.48208
4304.34	0.11025	0.05546	0.09689	0.04333	0.03598	0.03934	0.0221	0.02655	0.0176	0.02215	0.111	0.11	0.115	0.092	0.086	0.071	0.062	0.084	0.083	0.104	2.28744	1.16113	1.94033	1.08466	0.963511	1.27606	0.820908	0.727912	0.488347	0.490495
4306.27	0.11024	0.05587	0.09727	0.04346	0.03614	0.03956	0.02224	0.02618	0.01776	0.02244	0.111	0.11	0.115	0.092	0.086	0.071	0.062	0.084	0.083	0.104	2.28723	1.16971	1.94794	1.08792	0.967796	1.28319	0.826108	0.717768	0.492787	0.496917
4308.19	0.10997	0.05611	0.09729	0.04339	0.03614	0.0396	0.02234	0.02597	0.01786	0.02271	0.111	0.11	0.115	0.092	0.086	0.071	0.062	0.084	0.083	0.104	2.28163	1.17474	1.94834	1.08616	0.967796	1.28449	0.829823	0.712011	0.495561	0.502895
4310.12	0.10967	0.0563	0.09716	0.04327	0.03603	0.03959	0.02241	0.02593	0.01794	0.02301	0.111	0.11	0.115	0.092	0.086	0.071	0.062	0.084	0.083	0.104	2.27541	1.17872	1.94573	1.08316	0.96485	1.28417	0.832423	0.710914	0.497781	0.509539
4312.05	0.10955	0.05655	0.09708	0.04322	0.03593	0.0396	0.02252	0.02597	0.01801	0.02336	0.111	0.11	0.115	0.092	0.086	0.071	0.062	0.084	0.083	0.104	2.27292	1.18395	1.94413	1.08191	0.962172	1.28449	0.836509	0.712011	0.499723	0.517289
4313.98	0.10975	0.05696	0.09729	0.04329	0.036	0.03972	0.02271	0.02603	0.01811	0.02375	0.111	0.11	0.115	0.092	0.086	0.071	0.062	0.084	0.083	0.104	2.27707	1.19254	1.94834	1.08366	0.964047	1.28838	0.843567	0.713656	0.502498	0.525925
4315.91	0.11036	0.05757	0.09794	0.04355	0.03625	0.04003	0.02302	0.02611	0.01831	0.02415	0.111	0.11	0.115	0.092	0.086	0.071	0.062	0.084	0.083	0.104	2.28972	1.20531	1.96135	1.09017	0.970741	1.29844	0.855082	0.715849	0.508047	0.534783
4317.84	0.11141	0.05838	0.0991	0.04406	0.03669	0.04057	0.02342	0.02626	0.01861	0.0246	0.111	0.11	0.115	0.092	0.086	0.071	0.062	0.084	0.083	0.104	2.31151	1.22226	1.98459	1.10294	0.982524	1.31595	0.86994	0.719962	0.516371	0.544748
4319.77	0.11281	0.05939	0.10069	0.04473	0.03729	0.0413	0.02391	0.02645	0.01898	0.02511	0.111	0.11	0.115	0.092	0.086	0.071	0.062	0.084	0.083	0.104	2.34055	1.24341	2.01643	1.11971	0.998592	1.33963	0.888141	0.725171	0.526638	0.556042
4321.69	0.11438	0.06058	0.10257	0.04556	0.03803	0.04217	0.02446	0.02668	0.01942	0.02566	0.111	0.11	0.115	0.092	0.086	0.071	0.062	0.084	0.083	0.104	2.37313	1.26832	2.05408	1.14049	1.01841	1.36785	0.908571	0.731477	0.538847	0.568221
4323.62	0.11595	0.0618	0.10459	0.04646	0.03881	0.04309	0.02504	0.02697	0.01985	0.02626	0.111	0.11	0.115	0.092	0.086	0.071	0.062	0.084	0.083	0.104	2.4057	1.29387	2.09453	1.16301	1.0393	1.39769	0.930115	0.739427	0.550778	0.581507
4325.55	0.11727	0.06287	0.10651	0.04733	0.03954	0.04392	0.02559	0.02737	0.02026	0.02686	0.111	0.11	0.115	0.092	0.086	0.071	0.062	0.084	0.083	0.104	2.43309	1.31627	2.13298	1.18479	1.05884	1.42462	0.950545	0.750394	0.562154	0.594794
4327.48	0.11806	0.06369	0.10794	0.04799	0.04011	0.04456	0.02612	0.02787	0.0206	0.02742	0.111	0.11	0.115	0.092	0.086	0.071	0.062	0.084	0.083	0.104	2.44948	1.33344	2.16162	1.20131	1.07411	1.44538	0.970232	0.764102	0.571588	0.607195
4329.41	0.11809	0.06415	0.10854	0.04827	0.04042	0.0449	0.02653	0.02839	0.02084	0.0279	0.111	0.11	0.115	0.092	0.086	0.071	0.062	0.084	0.083	0.104	2.4501	1.34307	2.17363	1.20832	1.08241	1.4564	0.985461	0.778359	0.578247	0.617824
4331.34	0.11719	0.06415	0.10816	0.0481	0.04035	0.04486	0.02672	0.02889	0.02094	0.02825	0.111	0.11	0.115	0.092	0.086	0.071	0.062	0.084	0.083	0.104	2.43143	1.34307	2.16602	1.20407	1.08054	1.45511	0.992519	0.792067	0.581022	0.625575
4333.27	0.11526	0.06361	0.10677	0.04747	0.03987	0.04445	0.02666	0.02936	0.02087	0.0285	0.111	0.11	0.115	0.092	0.086	0.071	0.062	0.084	0.083	0.104	2.39139	1.33176	2.13819	1.1883	1.06768	1.44181	0.99029	0.804953	0.57908	0.631111
4335.19	0.11252	0.06257	0.10455	0.04644	0.039	0.04367	0.0264	0.02984	0.02065	0.02868	0.111	0.11	0.115	0.092	0.086	0.071	0.062	0.084	0.083	0.104	2.33454	1.30999	2.09373	1.16251	1.04438	1.41651	0.980632	0.818113	0.572975	0.635097
4337.12	0.10925	0.06121	0.10172	0.04512	0.03786	0.04259	0.02597	0.0303	0.02029	0.0288	0.111	0.11	0.115	0.092	0.086	0.071	0.062	0.084	0.083	0.104	2.26669	1.28151	2.03705	1.12947	1.01386	1.38148	0.96466	0.830725	0.562986	0.637754
4339.05	0.10568	0.05967	0.09848	0.0436	0.0366	0.04133	0.02544	0.03068	0.01983	0.02883	0.111	0.11	0.115	0.092	0.086	0.071	0.062	0.084	0.083	0.104	2.19262	1.24927	1.97217	1.09142	0.980114	1.34061	0.944973	0.841143	0.550223	0.638418
4340.98	0.10201	0.0581	0.09513	0.042	0.03533	0.04004	0.02491	0.03098	0.01935	0.02881	0.111	0.11	0.115	0.092	0.086	0.071	0.062	0.084	0.083	0.104	2.11648	1.2164	1.90508	1.05137	0.946105	1.29876	0.925286	0.849368	0.536904	0.637975
4342.91	0.09845	0.05661	0.09198	0.04049	0.03417	0.03882	0.02444	0.03118	0.01892	0.02882	0.111	0.11	0.115	0.092	0.086	0.071	0.062	0.084	0.083	0.104	2.04262	1.18521	1.842	1.01357	0.915041	1.25919	0.907828	0.854852	0.524973	0.638197
4344.84	0.09524	0.05527	0.08923	0.03917	0.03313	0.03771	0.02406	0.03129	0.01856	0.02894	0.111	0.11	0.115	0.092	0.086	0.071	0.062	0.084	0.083	0.104	1.97602	1.15715	1.78693	0.980527	0.887191	1.22318	0.893713	0.857867	0.514984	0.640854
4346.76	0.09244	0.05409	0.08689	0.03803	0.03222	0.03668	0.02376	0.03133	0.01828	0.02912	0.111	0.11	0.115	0.092	0.086	0.071	0.062	0.084	0.083	0.104	1.91792	1.13245	1.74007	0.95199	0.862822	1.18978	0.882569	0.858964	0.507215	0.64484
4348.69	0.08992	0.0531	0.08488	0.03703	0.03146	0.03579	0.02352	0.03129	0.01808	0.02929	0.111	0.11	0.115	0.092	0.086	0.071	0.062	0.084	0.083	0.104	1.86564	1.11172	1.69981	0.926957	0.84247	1.16091	0.873654	0.857867	0.501666	0.648605
4350.62	0.08758	0.05224	0.08314	0.03617	0.03082	0.03506	0.02328	0.03113	0.01793	0.02948	0.111	0.11	0.115	0.092	0.086	0.071	0.062	0.084	0.083	0.104	1.81709	1.09372	1.66497	0.905429	0.825331	1.13723	0.864739	0.853481	0.497503	0.652812
4352.55	0.08531	0.05145	0.08158	0.03535	0.03023	0.03439	0.02302	0.03087	0.01778	0.02968	0.111	0.11	0.115	0.092	0.086	0.071	0.062	0.084	0.083	0.104	1.76999	1.07718	1.63373	0.884903	0.809531	1.1155	0.855082	0.846352	0.493341	0.657241
4354.48	0.08309	0.05064	0.08006	0.0345	0.02961	0.03368	0.02276	0.03054	0.0176	0.02987	0.111	0.11	0.115	0.092	0.086	0.071	0.062	0.084	0.083	0.104	1.72393	1.06022	1.60329	0.863625	0.792928	1.09247	0.845424	0.837305	0.488347	0.661448
4356.41	0.08087	0.04981	0.07845	0.03361	0.02897	0.03294	0.02248	0.03019	0.01738	0.02999	0.111	0.11	0.115	0.092	0.086	0.071	0.062	0.084	0.083	0.104	1.67787	1.04284	1.57105	0.841346	0.77579	1.06846	0.835023	0.827709	0.482243	0.664105
4358.34	0.07862	0.04894	0.07669	0.0327	0.02829	0.03218	0.02217	0.02985	0.01719	0.03006	0.111	0.11	0.115	0.092	0.086	0.071	0.062	0.084	0.083	0.104	1.63119	1.02463	1.5358	0.818566	0.75758	1.04381	0.823508	0.818387	0.476971	0.665656
4360.26	0.07635	0.04809	0.07481	0.03175	0.02757	0.03142	0.02179	0.02953	0.01696	0.03011	0.111	0.11	0.115	0.092	0.086	0.071	0.062	0.084	0.083	0.104	1.58409	1.00683	1.49815	0.794785	0.738299	1.01916	0.809393	0.809614	0.470589	0.666763
4362.19	0.07414	0.04726	0.07294	0.03081	0.02689	0.03068	0.02144	0.02917	0.01669	0.03013	0.111	0.11	0.115	0.092	0.086	0.071	0.062	0.084	0.083	0.104	1.53824	0.989453	1.4607	0.771255	0.720089	0.995155	0.796392	0.799744	0.463097	0.667206
4364.12	0.07202	0.04646	0.07119	0.02992	0.02627	0.02995	0.02111	0.02878	0.01643	0.0301	0.111	0.11	0.115	0.092	0.086	0.071	0.062	0.084	0.083	0.104	1.49425	0.972703	1.42566	0.748976	0.703486	0.971477	0.784134	0.789052	0.455883	0.666541
4366.05	0.06997	0.04568	0.06955	0.02905	0.02565	0.02924	0.0208	0.02837	0.0162	0.03005	0.111	0.11	0.115	0.092	0.086	0.071	0.062	0.084	0.083	0.104	1.45172	0.956373	1.39281	0.727197	0.686883	0.948447	0.772619	0.777811	0.449501	0.665434
4367.98	0.06806	0.04496	0.06803	0.02823	0.02504	0.02857	0.0205	0.0279	0.01594	0.02997	0.111	0.11	0.115	0.092	0.086	0.071	0.062	0.084	0.083	0.104	1.41209	0.941299	1.36237	0.706671	0.670548	0.926714	0.761476	0.764925	0.442287	0.663663
4369.91	0.06631	0.04433	0.06665	0.02753	0.02445	0.02798	0.02023	0.02732	0.01571	0.02992	0.111	0.11	0.115	0.092	0.086	0.071	0.062	0.084	0.083	0.104	1.37578	0.928109	1.33474	0.689148	0.654748	0.907577	0.751447	0.749023	0.435905	0.662555
4371.83	0.06474	0.04376	0.06545	0.02693	0.02391	0.02745	0.02001	0.02675	0.01556	0.02992	0.111	0.11	0.115	0.092	0.086	0.071	0.062	0.084	0.083	0.104	1.34321	0.916175	1.31071	0.674128	0.640288	0.890385	0.743275	0.733396	0.431743	0.662555
4373.76	0.06332	0.04323	0.06433	0.02639	0.02346	0.02698	0.01978	0.02622	0.01547	0.02994	0.111	0.11	0.115	0.092	0.086	0.071	0.062	0.084	0.083	0.104	1.31375	0.905079	1.28828	0.660611	0.628237	0.87514	0.734731	0.718865	0.429246	0.662998
4375.69	0.06203	0.04275	0.06326	0.02586	0.0231	0.02654	0.01957	0.02572	0.01533	0.02995	0.111	0.11	0.115	0.092	0.086	0.071	0.062	0.084	0.083	0.104	1.28698	0.89503	1.26685	0.647343	0.618597	0.860868	0.726931	0.705157	0.425361	0.66322
4377.62	0.06081	0.04234	0.06227	0.02538	0.02275	0.02613	0.0194	0.02526	0.01519	0.02995	0.111	0.11	0.115	0.092	0.086	0.071	0.062	0.084	0.083	0.104	1.26167	0.886446	1.24702	0.635328	0.609224	0.847569	0.720616	0.692545	0.421477	0.66322
4379.55	0.05961	0.04195	0.0614	0.02494	0.02235	0.02581	0.01926	0.02481	0.01508	0.02996	0.111	0.11	0.115	0.092	0.086	0.071	0.062	0.084	0.083	0.104	1.23677	0.87828	1.2296	0.624313	0.598512	0.837189	0.715416	0.680207	0.418425	0.663441
4381.48	0.05841	0.04161	0.06061	0.02449	0.02199	0.02554	0.01913	0.02434	0.01498	0.02998	0.111	0.11	0.115	0.092	0.086	0.071	0.062	0.084	0.083	0.104	1.21188	0.871162	1.21378	0.613049	0.588872	0.828431	0.710587	0.667322	0.41565	0.663884
4383.4	0.05731	0.04137	0.05994	0.02402	0.02168	0.02525	0.01901	0.02393	0.01485	0.02996	0.111	0.11	0.115	0.092	0.086	0.071	0.062	0.084	0.083	0.104	1.18905	0.866137	1.20036	0.601283	0.58057	0.819025	0.70613	0.656081	0.412043	0.663441
4385.33	0.05635	0.04114	0.05936	0.02362	0.0214	0.02495	0.01893	0.02363	0.01472	0.02996	0.111	0.11	0.115	0.092	0.086	0.071	0.062	0.084	0.083	0.104	1.16914	0.861322	1.18875	0.59127	0.573072	0.809294	0.703158	0.647856	0.408436	0.663441
4387.26	0.05547	0.04093	0.05883	0.02332	0.02115	0.02468	0.01886	0.02343	0.01462	0.03001	0.111	0.11	0.115	0.092	0.086	0.071	0.062	0.084	0.083	0.104	1.15088	0.856925	1.17813	0.58376	0.566377	0.800536	0.700558	0.642373	0.405661	0.664548
4389.19	0.05467	0.04077	0.05836	0.02309	0.02094	0.0245	0.0188	0.02327	0.01456	0.0301	0.111	0.11	0.115	0.092	0.086	0.071	0.062	0.084	0.083	0.104	1.13428	0.853576	1.16872	0.578003	0.560754	0.794697	0.698329	0.637986	0.403996	0.666541
4391.12	0.05397	0.04069	0.05799	0.02286	0.02076	0.02439	0.01874	0.02316	0.0145	0.03018	0.111	0.11	0.115	0.092	0.086	0.071	0.062	0.084	0.083	0.104	1.11976	0.851901	1.16131	0.572245	0.555933	0.791129	0.6961	0.63497	0.402331	0.668313
4393.05	0.05335	0.04062	0.05776	0.02263	0.02061	0.0243	0.01871	0.02321	0.01445	0.03024	0.111	0.11	0.115	0.092	0.086	0.071	0.062	0.084	0.083	0.104	1.10689	0.850435	1.15671	0.566488	0.551917	0.78821	0.694986	0.636341	0.400944	0.669642
4394.98	0.05284	0.04059	0.05762	0.02246	0.02049	0.02425	0.01873	0.02343	0.01444	0.03032	0.111	0.11	0.115	0.092	0.086	0.071	0.062	0.084	0.083	0.104	1.09631	0.849807	1.1539	0.562232	0.548703	0.786588	0.695729	0.642373	0.400667	0.671413
4396.9	0.05243	0.04062	0.05754	0.02238	0.02041	0.02426	0.01877	0.02373	0.01447	0.03041	0.111	0.11	0.115	0.092	0.086	0.071	0.062	0.084	0.083	0.104	1.0878	0.850435	1.1523	0.56023	0.546561	0.786912	0.697215	0.650597	0.401499	0.673406
4398.83	0.05212	0.04071	0.0575	0.02236	0.02036	0.02427	0.01883	0.02409	0.01451	0.03054	0.111	0.11	0.115	0.092	0.086	0.071	0.062	0.084	0.083	0.104	1.08137	0.852319	1.1515	0.559729	0.545222	0.787237	0.699443	0.660467	0.402609	0.676285
4400.76	0.05186	0.04086	0.0575	0.02232	0.02034	0.02428	0.01892	0.02454	0.01453	0.03072	0.111	0.11	0.115	0.092	0.086	0.071	0.062	0.084	0.083	0.104	1.07598	0.85546	1.1515	0.558728	0.544686	0.787561	0.702786	0.672805	0.403164	0.680271
4402.69	0.05166	0.041	0.05754	0.02227	0.02033	0.02436	0.01902	0.02501	0.01454	0.0309	0.111	0.11	0.115	0.092	0.086	0.071	0.062	0.084	0.083	0.104	1.07183	0.858391	1.1523	0.557476	0.544418	0.790156	0.706501	0.685691	0.403441	0.684257
4404.62	0.05154	0.04115	0.05764	0.02225	0.02033	0.02447	0.0191	0.02544	0.01457	0.03104	0.111	0.11	0.115	0.092	0.086	0.071	0.062	0.084	0.083	0.104	1.06934	0.861531	1.1543	0.556976	0.544418	0.793724	0.709473	0.69748	0.404274	0.687357
4406.55	0.05151	0.04134	0.05781	0.02229	0.02033	0.02454	0.01918	0.02582	0.01462	0.03118	0.111	0.11	0.115	0.092	0.086	0.071	0.062	0.084	0.083	0.104	1.06872	0.865509	1.15771	0.557977	0.544418	0.795995	0.712444	0.707898	0.405661	0.690457
4408.48	0.05153	0.04157	0.05801	0.02235	0.02038	0.02459	0.01927	0.02614	0.01472	0.03142	0.111	0.11	0.115	0.092	0.086	0.071	0.062	0.084	0.083	0.104	1.06913	0.870325	1.16171	0.559479	0.545757	0.797616	0.715787	0.716672	0.408436	0.695772
4410.4	0.05158	0.04178	0.05822	0.0224	0.02045	0.02469	0.01933	0.02635	0.01486	0.03168	0.111	0.11	0.115	0.092	0.086	0.071	0.062	0.084	0.083	0.104	1.07017	0.874721	1.16592	0.56073	0.547632	0.80086	0.718016	0.722429	0.41232	0.701529
4412.33	0.05169	0.042	0.05851	0.02248	0.02054	0.02483	0.0194	0.02647	0.01497	0.03191	0.111	0.11	0.115	0.092	0.086	0.071	0.062	0.084	0.083	0.104	1.07245	0.879327	1.17173	0.562733	0.550042	0.805401	0.720616	0.725719	0.415372	0.706622
4414.26	0.05182	0.04221	0.05884	0.02259	0.02064	0.0249	0.01949	0.02647	0.01501	0.03212	0.111	0.11	0.115	0.092	0.086	0.071	0.062	0.084	0.083	0.104	1.07515	0.883724	1.17833	0.565487	0.55272	0.807672	0.723959	0.725719	0.416482	0.711273
4416.19	0.05194	0.04245	0.05919	0.02268	0.02073	0.02496	0.01954	0.02638	0.01506	0.03235	0.111	0.11	0.115	0.092	0.086	0.071	0.062	0.084	0.083	0.104	1.07764	0.888749	1.18534	0.56774	0.55513	0.809618	0.725816	0.723252	0.41787	0.716366
4418.12	0.05207	0.0427	0.05954	0.02275	0.02083	0.02504	0.01957	0.02626	0.01513	0.03256	0.111	0.11	0.115	0.092	0.086	0.071	0.062	0.084	0.083	0.104	1.08034	0.893983	1.19235	0.569492	0.557808	0.812213	0.726931	0.719962	0.419812	0.721016
4420.05	0.05229	0.04296	0.05988	0.02282	0.0209	0.02513	0.01967	0.02617	0.01518	0.0327	0.111	0.11	0.115	0.092	0.086	0.071	0.062	0.084	0.083	0.104	1.0849	0.899426	1.19916	0.571244	0.559683	0.815132	0.730645	0.717494	0.421199	0.724116
4421.97	0.05252	0.04319	0.06025	0.02291	0.02095	0.02524	0.0198	0.02608	0.01523	0.03284	0.111	0.11	0.115	0.092	0.086	0.071	0.062	0.084	0.083	0.104	1.08967	0.904242	1.20657	0.573497	0.561022	0.8187	0.735474	0.715027	0.422587	0.727217
4423.9	0.05271	0.04339	0.06073	0.02301	0.02102	0.02534	0.01986	0.02597	0.01529	0.03301	0.111	0.11	0.115	0.092	0.086	0.071	0.062	0.084	0.083	0.104	1.09361	0.908429	1.21618	0.576	0.562896	0.821944	0.737703	0.712011	0.424251	0.730981
4425.83	0.0529	0.04359	0.06123	0.02311	0.02112	0.02543	0.01985	0.02584	0.01536	0.03322	0.111	0.11	0.115	0.092	0.086	0.071	0.062	0.084	0.083	0.104	1.09756	0.912616	1.2262	0.578504	0.565574	0.824863	0.737331	0.708447	0.426194	0.735631
4427.76	0.05311	0.04378	0.06167	0.02321	0.02123	0.0255	0.01982	0.02564	0.01542	0.03343	0.111	0.11	0.115	0.092	0.086	0.071	0.062	0.084	0.083	0.104	1.10191	0.916594	1.23501	0.581007	0.56852	0.827134	0.736217	0.702963	0.427859	0.740282
4429.69	0.05334	0.04401	0.06204	0.02328	0.02132	0.02557	0.01983	0.02532	0.01544	0.03363	0.111	0.11	0.115	0.092	0.086	0.071	0.062	0.084	0.083	0.104	1.10668	0.921409	1.24242	0.582759	0.57093	0.829404	0.736589	0.69419	0.428413	0.74471
4431.62	0.05358	0.04424	0.06242	0.0233	0.02141	0.02561	0.0199	0.02495	0.01548	0.0338	0.111	0.11	0.115	0.092	0.086	0.071	0.062	0.084	0.083	0.104	1.11166	0.926225	1.25003	0.58326	0.57334	0.830702	0.739189	0.684046	0.429523	0.748475
4433.55	0.05373	0.04444	0.0628	0.02331	0.02148	0.02563	0.01998	0.02463	0.01557	0.03399	0.111	0.11	0.115	0.092	0.086	0.071	0.062	0.084	0.083	0.104	1.11478	0.930412	1.25764	0.58351	0.575214	0.831351	0.74216	0.675272	0.432021	0.752682
4435.47	0.05379	0.04462	0.06308	0.02334	0.02153	0.02564	0.02001	0.02435	0.0157	0.03417	0.111	0.11	0.115	0.092	0.086	0.071	0.062	0.084	0.083	0.104	1.11602	0.934181	1.26325	0.584261	0.576553	0.831675	0.743275	0.667596	0.435628	0.756668
4437.4	0.05381	0.04471	0.06328	0.02337	0.02154	0.02564	0.01996	0.02409	0.0158	0.03435	0.111	0.11	0.115	0.092	0.086	0.071	0.062	0.084	0.083	0.104	1.11644	0.936065	1.26725	0.585012	0.576821	0.831675	0.741417	0.660467	0.438402	0.760654
4439.33	0.05378	0.04476	0.06345	0.02336	0.02151	0.02563	0.0199	0.02386	0.0158	0.03449	0.111	0.11	0.115	0.092	0.086	0.071	0.062	0.084	0.083	0.104	1.11581	0.937112	1.27066	0.584762	0.576018	0.831351	0.739189	0.654162	0.438402	0.763755
4441.26	0.05366	0.04477	0.06353	0.02328	0.02148	0.02559	0.01987	0.02365	0.01577	0.03458	0.111	0.11	0.115	0.092	0.086	0.071	0.062	0.084	0.083	0.104	1.11332	0.937321	1.27226	0.582759	0.575214	0.830053	0.738074	0.648404	0.43757	0.765747
4443.19	0.0535	0.04473	0.06352	0.02313	0.02143	0.02552	0.01982	0.02348	0.01575	0.03466	0.111	0.11	0.115	0.092	0.086	0.071	0.062	0.084	0.083	0.104	1.11	0.936484	1.27206	0.579004	0.573875	0.827783	0.736217	0.643743	0.437015	0.767519
4445.12	0.05335	0.04461	0.06345	0.02298	0.02138	0.02544	0.01974	0.02332	0.01571	0.03477	0.111	0.11	0.115	0.092	0.086	0.071	0.062	0.084	0.083	0.104	1.10689	0.933971	1.27066	0.575249	0.572537	0.825188	0.733245	0.639357	0.435905	0.769955
4447.04	0.05322	0.04446	0.06334	0.02283	0.02129	0.02533	0.01967	0.02318	0.01565	0.03483	0.111	0.11	0.115	0.092	0.086	0.071	0.062	0.084	0.083	0.104	1.1042	0.930831	1.26845	0.571494	0.570126	0.82162	0.730645	0.635518	0.43424	0.771284
4448.97	0.05308	0.04438	0.06322	0.02272	0.02117	0.02524	0.01963	0.02305	0.01561	0.03479	0.111	0.11	0.115	0.092	0.086	0.071	0.062	0.084	0.083	0.104	1.10129	0.929156	1.26605	0.568741	0.566913	0.8187	0.72916	0.631954	0.43313	0.770398
4450.9	0.05293	0.04433	0.06311	0.02265	0.02106	0.02518	0.0196	0.02295	0.01557	0.03477	0.111	0.11	0.115	0.092	0.086	0.071	0.062	0.084	0.083	0.104	1.09818	0.928109	1.26385	0.566989	0.563967	0.816754	0.728045	0.629212	0.432021	0.769955
4452.83	0.05281	0.04427	0.06299	0.02257	0.02096	0.02514	0.01951	0.02286	0.01549	0.03476	0.111	0.11	0.115	0.092	0.086	0.071	0.062	0.084	0.083	0.104	1.09569	0.926853	1.26144	0.564986	0.561289	0.815457	0.724702	0.626745	0.429801	0.769733
4454.76	0.05272	0.04422	0.06293	0.0225	0.02089	0.02509	0.0194	0.02279	0.0154	0.03471	0.111	0.11	0.115	0.092	0.086	0.071	0.062	0.084	0.083	0.104	1.09382	0.925806	1.26024	0.563234	0.559415	0.813835	0.720616	0.624826	0.427304	0.768626
4456.69	0.05267	0.0442	0.06295	0.02246	0.02087	0.02503	0.01933	0.02274	0.01534	0.03461	0.111	0.11	0.115	0.092	0.086	0.071	0.062	0.084	0.083	0.104	1.09278	0.925387	1.26064	0.562232	0.558879	0.811889	0.718016	0.623455	0.425639	0.766412
4458.61	0.05266	0.04419	0.06302	0.02242	0.02086	0.025	0.01931	0.0227	0.01533	0.03451	0.111	0.11	0.115	0.092	0.086	0.071	0.062	0.084	0.083	0.104	1.09258	0.925178	1.26204	0.561231	0.558611	0.810915	0.717273	0.622358	0.425361	0.764197
4460.54	0.0527	0.04419	0.06308	0.02244	0.02084	0.02501	0.01929	0.02265	0.01532	0.03442	0.111	0.11	0.115	0.092	0.086	0.071	0.062	0.084	0.083	0.104	1.09341	0.925178	1.26325	0.561732	0.558076	0.81124	0.71653	0.620987	0.425084	0.762204
4462.47	0.0528	0.04416	0.06316	0.02245	0.02081	0.02502	0.01923	0.02257	0.01532	0.03434	0.111	0.11	0.115	0.092	0.086	0.071	0.062	0.084	0.083	0.104	1.09548	0.92455	1.26485	0.561982	0.557272	0.811564	0.714301	0.618794	0.425084	0.760433
4464.4	0.05293	0.04415	0.06323	0.02238	0.02079	0.02502	0.01917	0.02248	0.01532	0.0343	0.111	0.11	0.115	0.092	0.086	0.071	0.062	0.084	0.083	0.104	1.09818	0.92434	1.26625	0.56023	0.556737	0.811564	0.712073	0.616327	0.425084	0.759547
4466.33	0.05311	0.04419	0.06332	0.02232	0.02076	0.025	0.01912	0.02243	0.01531	0.03425	0.111	0.11	0.115	0.092	0.086	0.071	0.062	0.084	0.083	0.104	1.10191	0.925178	1.26805	0.558728	0.555933	0.810915	0.710215	0.614956	0.424806	0.75844
4468.26	0.05331	0.04423	0.06351	0.02234	0.02074	0.025	0.01912	0.02245	0.01529	0.0342	0.111	0.11	0.115	0.092	0.086	0.071	0.062	0.084	0.083	0.104	1.10606	0.926015	1.27186	0.559228	0.555398	0.810915	0.710215	0.615504	0.424251	0.757333
4470.19	0.05353	0.04427	0.06374	0.0224	0.02078	0.02502	0.01909	0.02254	0.01527	0.03418	0.111	0.11	0.115	0.092	0.086	0.071	0.062	0.084	0.083	0.104	1.11063	0.926853	1.27646	0.56073	0.556469	0.811564	0.709101	0.617972	0.423697	0.75689
4472.11	0.05376	0.04433	0.06394	0.02246	0.02084	0.02505	0.01908	0.02265	0.01523	0.03422	0.111	0.11	0.115	0.092	0.086	0.071	0.062	0.084	0.083	0.104	1.1154	0.928109	1.28047	0.562232	0.558076	0.812537	0.70873	0.620987	0.422587	0.757776
4474.04	0.05398	0.04444	0.06414	0.02255	0.02088	0.02512	0.01907	0.02269	0.01522	0.0343	0.111	0.11	0.115	0.092	0.086	0.071	0.062	0.084	0.083	0.104	1.11996	0.930412	1.28447	0.564485	0.559147	0.814808	0.708358	0.622084	0.422309	0.759547
4475.97	0.05419	0.04456	0.06435	0.02266	0.02089	0.02522	0.01909	0.02266	0.01527	0.03438	0.111	0.11	0.115	0.092	0.086	0.071	0.062	0.084	0.083	0.104	1.12432	0.932924	1.28868	0.567239	0.559415	0.818052	0.709101	0.621262	0.423697	0.761319
4477.9	0.05446	0.04465	0.06459	0.02277	0.02092	0.02535	0.01913	0.02256	0.01538	0.03445	0.111	0.11	0.115	0.092	0.086	0.071	0.062	0.084	0.083	0.104	1.12992	0.934809	1.29348	0.569992	0.560218	0.822268	0.710587	0.61852	0.426749	0.762869
4479.83	0.05476	0.0447	0.06486	0.02285	0.02104	0.02546	0.01916	0.02242	0.01544	0.03453	0.111	0.11	0.115	0.092	0.086	0.071	0.062	0.084	0.083	0.104	1.13615	0.935855	1.29889	0.571995	0.563432	0.825836	0.711701	0.614682	0.428413	0.76464
4481.76	0.05503	0.04484	0.06514	0.02297	0.02119	0.02554	0.01921	0.02228	0.01547	0.03464	0.111	0.11	0.115	0.092	0.086	0.071	0.062	0.084	0.083	0.104	1.14175	0.938787	1.3045	0.574999	0.567448	0.828431	0.713559	0.610843	0.429246	0.767076
4483.69	0.05529	0.04504	0.06541	0.02313	0.02131	0.02565	0.01932	0.02218	0.01551	0.03478	0.111	0.11	0.115	0.092	0.086	0.071	0.062	0.084	0.083	0.104	1.14714	0.942974	1.30991	0.579004	0.570662	0.831999	0.717645	0.608102	0.430356	0.770176
4485.61	0.05559	0.04526	0.06573	0.02328	0.02143	0.02577	0.01939	0.02214	0.01559	0.03494	0.111	0.11	0.115	0.092	0.086	0.071	0.062	0.084	0.083	0.104	1.15337	0.94758	1.31631	0.582759	0.573875	0.835892	0.720245	0.607005	0.432576	0.773719
4487.54	0.05593	0.04548	0.06606	0.02343	0.02153	0.02588	0.01943	0.02219	0.01567	0.03514	0.111	0.11	0.115	0.092	0.086	0.071	0.062	0.084	0.083	0.104	1.16042	0.952186	1.32292	0.586514	0.576553	0.83946	0.72173	0.608376	0.434795	0.778148
4489.47	0.05625	0.04571	0.06641	0.02361	0.02165	0.02602	0.01953	0.0223	0.01581	0.03536	0.111	0.11	0.115	0.092	0.086	0.071	0.062	0.084	0.083	0.104	1.16706	0.957001	1.32993	0.59102	0.579767	0.844001	0.725445	0.611392	0.43868	0.78302
4491.4	0.05655	0.04594	0.06676	0.02378	0.02179	0.02621	0.01964	0.02243	0.01596	0.03557	0.111	0.11	0.115	0.092	0.086	0.071	0.062	0.084	0.083	0.104	1.17329	0.961817	1.33694	0.595275	0.583516	0.850164	0.729531	0.614956	0.442842	0.78767
4493.33	0.05684	0.04614	0.06708	0.02391	0.02196	0.02636	0.01974	0.02254	0.01611	0.03578	0.111	0.11	0.115	0.092	0.086	0.071	0.062	0.084	0.083	0.104	1.1793	0.966004	1.34335	0.59853	0.588068	0.855029	0.733245	0.617972	0.447004	0.792321
4495.26	0.05711	0.04627	0.06736	0.02399	0.02212	0.02645	0.01984	0.02266	0.01623	0.03604	0.111	0.11	0.115	0.092	0.086	0.071	0.062	0.084	0.083	0.104	1.1849	0.968726	1.34896	0.600532	0.592353	0.857949	0.73696	0.621262	0.450334	0.798078
4497.19	0.05732	0.0464	0.06759	0.02406	0.02224	0.02654	0.01993	0.02277	0.01635	0.03629	0.111	0.11	0.115	0.092	0.086	0.071	0.062	0.084	0.083	0.104	1.18926	0.971447	1.35356	0.602285	0.595567	0.860868	0.740303	0.624277	0.453663	0.803614
4499.11	0.05749	0.04651	0.06779	0.02414	0.02235	0.02667	0.02001	0.02286	0.01642	0.03649	0.111	0.11	0.115	0.092	0.086	0.071	0.062	0.084	0.083	0.104	1.19279	0.97375	1.35757	0.604287	0.598512	0.865085	0.743275	0.626745	0.455606	0.808043
4501.04	0.05762	0.04663	0.06796	0.02425	0.02244	0.02678	0.02008	0.02296	0.01647	0.03663	0.111	0.11	0.115	0.092	0.086	0.071	0.062	0.084	0.083	0.104	1.19549	0.976263	1.36097	0.607041	0.600922	0.868653	0.745875	0.629487	0.456993	0.811143
4502.97	0.05767	0.04669	0.06811	0.02432	0.02247	0.02686	0.02012	0.02304	0.01651	0.03673	0.111	0.11	0.115	0.092	0.086	0.071	0.062	0.084	0.083	0.104	1.19652	0.977519	1.36398	0.608793	0.601726	0.871248	0.747361	0.63168	0.458103	0.813358
4504.9	0.05762	0.0467	0.06814	0.02433	0.02247	0.0269	0.02015	0.02309	0.01654	0.0368	0.111	0.11	0.115	0.092	0.086	0.071	0.062	0.084	0.083	0.104	1.19549	0.977728	1.36458	0.609043	0.601726	0.872545	0.748475	0.633051	0.458935	0.814908
4506.83	0.05749	0.04668	0.06804	0.02431	0.02247	0.02689	0.02015	0.02314	0.01658	0.03681	0.111	0.11	0.115	0.092	0.086	0.071	0.062	0.084	0.083	0.104	1.19279	0.977309	1.36257	0.608543	0.601726	0.872221	0.748475	0.634422	0.460045	0.815129
4508.76	0.0573	0.04661	0.06787	0.02428	0.02248	0.02686	0.02014	0.02321	0.01661	0.03679	0.111	0.11	0.115	0.092	0.086	0.071	0.062	0.084	0.083	0.104	1.18885	0.975844	1.35917	0.607792	0.601993	0.871248	0.748104	0.636341	0.460877	0.814686
4510.68	0.05709	0.04639	0.06763	0.0242	0.02246	0.02678	0.02009	0.02326	0.01662	0.03677	0.111	0.11	0.115	0.092	0.086	0.071	0.062	0.084	0.083	0.104	1.18449	0.971238	1.35436	0.605789	0.601458	0.868653	0.746246	0.637712	0.461155	0.814243
4512.61	0.05683	0.04607	0.06726	0.02412	0.02238	0.02663	0.01999	0.02325	0.01659	0.03673	0.111	0.11	0.115	0.092	0.086	0.071	0.062	0.084	0.083	0.104	1.17909	0.964538	1.34695	0.603787	0.599316	0.863787	0.742532	0.637437	0.460323	0.813358
4514.54	0.05645	0.04574	0.06676	0.02405	0.02227	0.02644	0.01988	0.02317	0.01654	0.03668	0.111	0.11	0.115	0.092	0.086	0.071	0.062	0.084	0.083	0.104	1.17121	0.957629	1.33694	0.602034	0.59637	0.857624	0.738446	0.635244	0.458935	0.81225
4516.47	0.05595	0.04544	0.06623	0.02395	0.02216	0.02622	0.01981	0.02304	0.01654	0.03662	0.111	0.11	0.115	0.092	0.086	0.071	0.062	0.084	0.083	0.104	1.16084	0.951348	1.32633	0.599531	0.593424	0.850488	0.735846	0.63168	0.458935	0.810922
4518.4	0.05542	0.04516	0.06569	0.0238	0.02209	0.02603	0.01973	0.02292	0.01658	0.0366	0.111	0.11	0.115	0.092	0.086	0.071	0.062	0.084	0.083	0.104	1.14984	0.945486	1.31551	0.595776	0.59155	0.844325	0.732874	0.62839	0.460045	0.810479
4520.33	0.05487	0.04484	0.06513	0.02367	0.02205	0.02588	0.01962	0.02281	0.01661	0.03665	0.111	0.11	0.115	0.092	0.086	0.071	0.062	0.084	0.083	0.104	1.13843	0.938787	1.3043	0.592522	0.590478	0.83946	0.728788	0.625374	0.460877	0.811586
4522.25	0.05423	0.04446	0.06449	0.02357	0.022	0.02568	0.01945	0.02268	0.01662	0.03673	0.111	0.11	0.115	0.092	0.086	0.071	0.062	0.084	0.083	0.104	1.12515	0.930831	1.29148	0.590019	0.58914	0.832972	0.722473	0.62181	0.461155	0.813358
4524.18	0.05351	0.04398	0.06369	0.02348	0.02191	0.02541	0.01925	0.02251	0.01664	0.0367	0.111	0.11	0.115	0.092	0.086	0.071	0.062	0.084	0.083	0.104	1.11021	0.920781	1.27546	0.587766	0.586729	0.824215	0.715044	0.617149	0.46171	0.812693
4526.11	0.05271	0.0434	0.06274	0.02333	0.02175	0.02508	0.01902	0.0223	0.01661	0.03651	0.111	0.11	0.115	0.092	0.086	0.071	0.062	0.084	0.083	0.104	1.09361	0.908638	1.25644	0.584011	0.582445	0.81351	0.706501	0.611392	0.460877	0.808486
4528.04	0.05173	0.0427	0.06165	0.02302	0.02147	0.02465	0.01875	0.022	0.01648	0.03611	0.111	0.11	0.115	0.092	0.086	0.071	0.062	0.084	0.083	0.104	1.07328	0.893983	1.23461	0.576251	0.574947	0.799563	0.696472	0.603167	0.45727	0.799628
4529.97	0.05051	0.04186	0.06036	0.02247	0.02102	0.02413	0.01836	0.02154	0.01621	0.03548	0.111	0.11	0.115	0.092	0.086	0.071	0.062	0.084	0.083	0.104	1.04797	0.876396	1.20877	0.562483	0.562896	0.782696	0.681985	0.590555	0.449779	0.785677
4531.9	0.04909	0.04083	0.05894	0.02179	0.0204	0.02351	0.01793	0.0209	0.01578	0.03459	0.111	0.11	0.115	0.092	0.086	0.071	0.062	0.084	0.083	0.104	1.01851	0.854832	1.18034	0.545461	0.546293	0.762585	0.666013	0.573008	0.437847	0.765969
4533.82	0.04757	0.03969	0.05744	0.02104	0.01966	0.02285	0.01749	0.02011	0.0152	0.03349	0.111	0.11	0.115	0.092	0.086	0.071	0.062	0.084	0.083	0.104	0.98697	0.830964	1.1503	0.526686	0.526477	0.741177	0.649669	0.551349	0.421754	0.74161
4535.75	0.046	0.03854	0.05584	0.02024	0.01887	0.02219	0.01701	0.01928	0.01458	0.03233	0.111	0.11	0.115	0.092	0.086	0.071	0.062	0.084	0.083	0.104	0.954396	0.806887	1.11826	0.50666	0.505321	0.719769	0.631839	0.528593	0.404551	0.715923
4537.68	0.04442	0.03736	0.05417	0.01941	0.01813	0.02149	0.01645	0.01845	0.01397	0.0312	0.111	0.11	0.115	0.092	0.086	0.071	0.062	0.084	0.083	0.104	0.921615	0.782183	1.08481	0.485883	0.485505	0.697063	0.611038	0.505838	0.387625	0.6909
4539.61	0.04288	0.03614	0.05248	0.01865	0.01746	0.02076	0.01591	0.01766	0.01345	0.03015	0.111	0.11	0.115	0.092	0.086	0.071	0.062	0.084	0.083	0.104	0.889663	0.75664	1.05097	0.466858	0.467563	0.673384	0.59098	0.484178	0.373197	0.667649
4541.54	0.0414	0.03496	0.05085	0.01799	0.01684	0.02008	0.01541	0.0169	0.01298	0.02912	0.111	0.11	0.115	0.092	0.086	0.071	0.062	0.084	0.083	0.104	0.858957	0.731935	1.01833	0.450337	0.45096	0.651327	0.572407	0.463342	0.360156	0.64484
4543.47	0.03996	0.03388	0.04931	0.01735	0.01624	0.01943	0.01494	0.01618	0.01251	0.02807	0.111	0.11	0.115	0.092	0.086	0.071	0.062	0.084	0.083	0.104	0.82908	0.709324	0.987486	0.434316	0.434892	0.630244	0.554949	0.443602	0.347115	0.621589
4545.4	0.03854	0.03284	0.0478	0.01669	0.01566	0.01879	0.01447	0.01545	0.01207	0.02711	0.111	0.11	0.115	0.092	0.086	0.071	0.062	0.084	0.083	0.104	0.799618	0.68755	0.957247	0.417794	0.41936	0.609484	0.53749	0.423587	0.334906	0.60033
4547.32	0.03713	0.03183	0.04632	0.01602	0.01506	0.01821	0.014	0.01474	0.01164	0.02626	0.111	0.11	0.115	0.092	0.086	0.071	0.062	0.084	0.083	0.104	0.770364	0.666404	0.927608	0.401022	0.403293	0.590671	0.520032	0.404122	0.322975	0.581507
4549.25	0.03579	0.03084	0.04484	0.01537	0.01454	0.01767	0.01355	0.01407	0.01119	0.02545	0.111	0.11	0.115	0.092	0.086	0.071	0.062	0.084	0.083	0.104	0.742562	0.645677	0.89797	0.384751	0.389368	0.573155	0.503317	0.385752	0.310489	0.563571
4551.18	0.0345	0.02989	0.04333	0.01482	0.01406	0.01711	0.01313	0.01344	0.01077	0.0246	0.111	0.11	0.115	0.092	0.086	0.071	0.062	0.084	0.083	0.104	0.715797	0.625788	0.86773	0.370983	0.376514	0.554991	0.487716	0.36848	0.298835	0.544748
4553.11	0.03322	0.02891	0.04186	0.01434	0.01359	0.01652	0.01274	0.01286	0.01041	0.02378	0.111	0.11	0.115	0.092	0.086	0.071	0.062	0.084	0.083	0.104	0.68924	0.60527	0.838292	0.358968	0.363928	0.535853	0.473229	0.352578	0.288846	0.52659
4555.04	0.03199	0.0279	0.04048	0.01381	0.01311	0.01596	0.01236	0.0123	0.01005	0.02303	0.111	0.11	0.115	0.092	0.086	0.071	0.062	0.084	0.083	0.104	0.66372	0.584125	0.810656	0.3457	0.351074	0.517688	0.459114	0.337225	0.278857	0.509982
4556.97	0.03083	0.02693	0.03914	0.01327	0.01263	0.01544	0.01196	0.01171	0.00969	0.02229	0.111	0.11	0.115	0.092	0.086	0.071	0.062	0.084	0.083	0.104	0.639653	0.563816	0.783821	0.332183	0.33822	0.500821	0.444256	0.321049	0.268868	0.493595
4558.9	0.02966	0.02601	0.03774	0.0127	0.01213	0.0149	0.01154	0.01111	0.00932	0.02153	0.111	0.11	0.115	0.092	0.086	0.071	0.062	0.084	0.083	0.104	0.615378	0.544555	0.755785	0.317914	0.32483	0.483306	0.428655	0.304599	0.258602	0.476765
4560.82	0.02844	0.02515	0.03634	0.01214	0.01162	0.01433	0.01108	0.01051	0.00897	0.02078	0.111	0.11	0.115	0.092	0.086	0.071	0.062	0.084	0.083	0.104	0.590066	0.52655	0.727748	0.303896	0.311173	0.464817	0.411568	0.288149	0.24889	0.460157
4562.75	0.02725	0.02431	0.03501	0.01161	0.01114	0.01377	0.01063	0.0099	0.00861	0.02006	0.111	0.11	0.115	0.092	0.086	0.071	0.062	0.084	0.083	0.104	0.565376	0.508963	0.701113	0.290629	0.298319	0.446652	0.394853	0.271425	0.238902	0.444213
4564.68	0.02614	0.02341	0.03373	0.01111	0.01067	0.01322	0.01018	0.00929	0.00827	0.01933	0.111	0.11	0.115	0.092	0.086	0.071	0.062	0.084	0.083	0.104	0.542346	0.49012	0.67548	0.278112	0.285733	0.428812	0.378138	0.254701	0.229468	0.428048
4566.61	0.02512	0.02246	0.03247	0.01064	0.01019	0.01271	0.0098	0.00876	0.00794	0.01861	0.111	0.11	0.115	0.092	0.086	0.071	0.062	0.084	0.083	0.104	0.521183	0.470231	0.650247	0.266347	0.272879	0.412269	0.364023	0.24017	0.220311	0.412104
4568.54	0.02412	0.02155	0.03124	0.0102	0.00974	0.01222	0.00944	0.00827	0.0076	0.01791	0.111	0.11	0.115	0.092	0.086	0.071	0.062	0.084	0.083	0.104	0.500436	0.451179	0.625615	0.255333	0.260828	0.396375	0.35065	0.226736	0.210877	0.396603
4570.47	0.02308	0.02071	0.03003	0.00975	0.00935	0.01173	0.00907	0.00778	0.00728	0.01725	0.111	0.11	0.115	0.092	0.086	0.071	0.062	0.084	0.083	0.104	0.478858	0.433592	0.601383	0.244068	0.250384	0.380482	0.336907	0.213302	0.201998	0.381988
4572.4	0.02199	0.0199	0.02879	0.00929	0.00895	0.01128	0.00869	0.00726	0.00699	0.01659	0.111	0.11	0.115	0.092	0.086	0.071	0.062	0.084	0.083	0.104	0.456243	0.416634	0.576551	0.232553	0.239673	0.365885	0.322791	0.199045	0.193951	0.367373
4574.32	0.02093	0.01907	0.02748	0.00887	0.00853	0.01085	0.0083	0.00673	0.0067	0.01593	0.111	0.11	0.115	0.092	0.086	0.071	0.062	0.084	0.083	0.104	0.43425	0.399256	0.550317	0.222039	0.228425	0.351937	0.308305	0.184514	0.185905	0.352758
4576.25	0.0199	0.01825	0.02616	0.00844	0.00813	0.0104	0.00794	0.00622	0.0064	0.01527	0.111	0.11	0.115	0.092	0.086	0.071	0.062	0.084	0.083	0.104	0.41288	0.382089	0.523882	0.211275	0.217714	0.337341	0.294933	0.170532	0.177581	0.338142
4578.18	0.01893	0.01741	0.02492	0.00798	0.00774	0.00992	0.00759	0.00573	0.00613	0.01463	0.111	0.11	0.115	0.092	0.086	0.071	0.062	0.084	0.083	0.104	0.392755	0.364502	0.49905	0.19976	0.20727	0.321771	0.281932	0.157098	0.170089	0.32397
4580.11	0.01794	0.01657	0.02371	0.00756	0.00738	0.00945	0.00725	0.00524	0.00591	0.01397	0.111	0.11	0.115	0.092	0.086	0.071	0.062	0.084	0.083	0.104	0.372215	0.346916	0.474819	0.189247	0.19763	0.306526	0.269302	0.143663	0.163985	0.309355
4582.04	0.01691	0.01573	0.02248	0.00718	0.00704	0.00901	0.0069	0.00476	0.00571	0.01329	0.111	0.11	0.115	0.092	0.086	0.071	0.062	0.084	0.083	0.104	0.350844	0.329329	0.450186	0.179734	0.188525	0.292254	0.256302	0.130503	0.158435	0.294297
4583.97	0.01596	0.01493	0.02129	0.00678	0.0067	0.00859	0.00656	0.00432	0.00547	0.0126	0.111	0.11	0.115	0.092	0.086	0.071	0.062	0.084	0.083	0.104	0.331134	0.31258	0.426355	0.169721	0.17942	0.278631	0.243672	0.11844	0.151776	0.279017
4585.89	0.01511	0.01422	0.02019	0.00637	0.00632	0.00817	0.00626	0.0039	0.00516	0.01194	0.111	0.11	0.115	0.092	0.086	0.071	0.062	0.084	0.083	0.104	0.313498	0.297715	0.404327	0.159458	0.169244	0.265007	0.232529	0.106925	0.143174	0.264402
4587.82	0.01427	0.01356	0.01918	0.00599	0.00595	0.00775	0.00594	0.00346	0.00485	0.01132	0.111	0.11	0.115	0.092	0.086	0.071	0.062	0.084	0.083	0.104	0.29607	0.283897	0.3841	0.149945	0.159335	0.251384	0.220642	0.0948617	0.134573	0.250673
4589.75	0.01345	0.01288	0.01818	0.00566	0.00563	0.00735	0.00556	0.00306	0.0046	0.01075	0.111	0.11	0.115	0.092	0.086	0.071	0.062	0.084	0.083	0.104	0.279057	0.26966	0.364074	0.141685	0.150766	0.238409	0.206527	0.083895	0.127636	0.23805
4591.68	0.01276	0.01216	0.0172	0.00535	0.00533	0.00698	0.00517	0.00269	0.0044	0.01023	0.111	0.11	0.115	0.092	0.086	0.071	0.062	0.084	0.083	0.104	0.264741	0.254586	0.344449	0.133924	0.142732	0.226408	0.19204	0.0737508	0.122087	0.226535
4593.61	0.01208	0.01148	0.01628	0.00503	0.00504	0.00666	0.00485	0.00229	0.00421	0.00975	0.111	0.11	0.115	0.092	0.086	0.071	0.062	0.084	0.083	0.104	0.250633	0.240349	0.326025	0.125914	0.134967	0.216028	0.180154	0.0627842	0.116815	0.215906
4595.54	0.01136	0.01087	0.0154	0.00471	0.00476	0.00633	0.00463	0.00193	0.00401	0.00927	0.111	0.11	0.115	0.092	0.086	0.071	0.062	0.084	0.083	0.104	0.235694	0.227578	0.308402	0.117904	0.127468	0.205324	0.171982	0.0529142	0.111265	0.205277
4597.47	0.01063	0.01029	0.01455	0.0044	0.00449	0.006	0.00441	0.00167	0.0038	0.00878	0.111	0.11	0.115	0.092	0.086	0.071	0.062	0.084	0.083	0.104	0.220549	0.215435	0.29138	0.110143	0.120238	0.19462	0.16381	0.0457858	0.105439	0.194426
4599.39	0.00998	0.00975	0.0137	0.00412	0.00425	0.0057	0.00417	0.00146	0.0036	0.0083	0.111	0.11	0.115	0.092	0.086	0.071	0.062	0.084	0.083	0.104	0.207063	0.20413	0.274357	0.103134	0.113811	0.184889	0.154895	0.0400283	0.0998892	0.183797
4601.32	0.00944	0.00923	0.01289	0.00386	0.00403	0.00546	0.0039	0.00127	0.00346	0.00786	0.111	0.11	0.115	0.092	0.086	0.071	0.062	0.084	0.083	0.104	0.195859	0.193243	0.258136	0.0966259	0.10792	0.177104	0.144866	0.0348192	0.0960046	0.174054
4603.25	0.0089	0.00874	0.01213	0.00359	0.0038	0.00522	0.00365	0.00113	0.00333	0.00749	0.111	0.11	0.115	0.092	0.086	0.071	0.062	0.084	0.083	0.104	0.184655	0.182984	0.242916	0.0898671	0.10176	0.169319	0.13558	0.0309808	0.0923975	0.16586
4605.18	0.00832	0.00829	0.01145	0.00332	0.00359	0.00497	0.00347	0.00101	0.00319	0.00719	0.111	0.11	0.115	0.092	0.086	0.071	0.062	0.084	0.083	0.104	0.172621	0.173562	0.229299	0.0831083	0.0961369	0.16121	0.128894	0.0276908	0.0885129	0.159217
4607.11	0.00777	0.00786	0.01082	0.00308	0.00338	0.0047	0.00332	0.000898048	0.00304	0.00689	0.111	0.11	0.115	0.092	0.086	0.071	0.062	0.084	0.083	0.104	0.16121	0.16456	0.216682	0.0771004	0.0905133	0.152452	0.123322	0.0246215	0.0843508	0.152574
4609.04	0.00729	0.00745	0.01024	0.0029	0.00321	0.00444	0.00316	0.000793293	0.00288	0.00654	0.111	0.11	0.115	0.092	0.086	0.071	0.062	0.084	0.083	0.104	0.151251	0.155976	0.205067	0.0725946	0.0859608	0.144019	0.117379	0.0217494	0.0799113	0.144823
4610.96	0.00686	0.00706	0.00971	0.00276	0.00306	0.00422	0.00301	0.000718474	0.00275	0.00616	0.111	0.11	0.115	0.092	0.086	0.071	0.062	0.084	0.083	0.104	0.14233	0.147811	0.194453	0.06909	0.081944	0.136883	0.111807	0.0196982	0.0763042	0.136408
4612.89	0.00649	0.00672	0.00917	0.00264	0.00292	0.00399	0.00288	0.000661492	0.00262	0.00581	0.111	0.11	0.115	0.092	0.086	0.071	0.062	0.084	0.083	0.104	0.134653	0.140692	0.183639	0.0660861	0.0781949	0.129422	0.106978	0.0181359	0.0726971	0.128658
4614.82	0.00612	0.00639	0.00864	0.00251	0.00278	0.00379	0.00276	0.000591278	0.00248	0.00557	0.111	0.11	0.115	0.092	0.086	0.071	0.062	0.084	0.083	0.104	0.126976	0.133783	0.173025	0.0628318	0.0744458	0.122935	0.102521	0.0162109	0.0688125	0.123343
4616.75	0.00575	0.00606	0.00812	0.00241	0.00266	0.00365	0.00264	0.000492126	0.00233	0.00534	0.111	0.11	0.115	0.092	0.086	0.071	0.062	0.084	0.083	0.104	0.1193	0.126874	0.162612	0.0603286	0.0712323	0.118394	0.0980632	0.0134925	0.0646505	0.11825
4618.68	0.00541	0.00573	0.00765	0.00229	0.00255	0.00357	0.00252	0.000431612	0.00224	0.00507	0.111	0.11	0.115	0.092	0.086	0.071	0.062	0.084	0.083	0.104	0.112245	0.119965	0.1532	0.0573247	0.0682866	0.115799	0.0936058	0.0118334	0.0621533	0.112271
4620.61	0.00508	0.00542	0.00721	0.00215	0.00243	0.00344	0.0024	0.000460908	0.00218	0.00481	0.111	0.11	0.115	0.092	0.086	0.071	0.062	0.084	0.083	0.104	0.105399	0.113475	0.144388	0.0538201	0.0650731	0.111582	0.0891484	0.0126366	0.0604884	0.106514
4622.53	0.00476	0.00513	0.0068	0.002	0.00233	0.00331	0.00226	0.000543907	0.00209	0.00458	0.111	0.11	0.115	0.092	0.086	0.071	0.062	0.084	0.083	0.104	0.0987593	0.107404	0.136177	0.0500652	0.0623952	0.107365	0.0839481	0.0149121	0.0579912	0.101421
4624.46	0.00444	0.00487	0.0064	0.00183	0.0022	0.00316	0.00212	0.000583798	0.00197	0.00437	0.111	0.11	0.115	0.092	0.086	0.071	0.062	0.084	0.083	0.104	0.09212	0.10196	0.128167	0.0458097	0.058914	0.1025	0.0787477	0.0160058	0.0546616	0.0967703
4626.39	0.00417	0.00463	0.00599	0.00168	0.00202	0.00301	0.00202	0.000579193	0.0019	0.00414	0.111	0.11	0.115	0.092	0.086	0.071	0.062	0.084	0.083	0.104	0.0865181	0.0969354	0.119956	0.0420548	0.0540937	0.0976342	0.0750332	0.0158795	0.0527193	0.0916771
4628.32	0.0039	0.00439	0.00557	0.00158	0.00185	0.00288	0.00194	0.000596404	0.00184	0.0039	0.111	0.11	0.115	0.092	0.086	0.071	0.062	0.084	0.083	0.104	0.0809162	0.0919106	0.111545	0.0395515	0.0495413	0.0934175	0.0720616	0.0163514	0.0510545	0.0863625
4630.25	0.00367	0.00417	0.00521	0.00151	0.00173	0.00275	0.00184	0.000587106	0.00176	0.00372	0.111	0.11	0.115	0.092	0.086	0.071	0.062	0.084	0.083	0.104	0.0761442	0.0873046	0.104336	0.0377992	0.0463278	0.0892007	0.0683471	0.0160965	0.0488347	0.0823765
4632.18	0.00345	0.004	0.00493	0.00144	0.00167	0.00261	0.00172	0.000604644	0.00169	0.00357	0.111	0.11	0.115	0.092	0.086	0.071	0.062	0.084	0.083	0.104	0.0715797	0.0837455	0.0987286	0.036047	0.044721	0.0846596	0.0638897	0.0165773	0.0468924	0.0790549
4634.1	0.00323	0.00381	0.00466	0.00136	0.00163	0.00248	0.00163	0.00058794	0.00163	0.00341	0.111	0.11	0.115	0.092	0.086	0.071	0.062	0.084	0.083	0.104	0.0670152	0.0797675	0.0933216	0.0340443	0.0436499	0.0804428	0.0605466	0.0161194	0.0452276	0.0755118
4636.03	0.00301	0.00357	0.00435	0.00129	0.00157	0.00239	0.00156	0.000567675	0.00157	0.00326	0.111	0.11	0.115	0.092	0.086	0.071	0.062	0.084	0.083	0.104	0.0624507	0.0747428	0.0871135	0.0322921	0.0420431	0.0775235	0.0579465	0.0155638	0.0435628	0.0721902
4637.96	0.00284	0.00336	0.00406	0.00121	0.0015	0.00232	0.0015	0.000576273	0.00148	0.00313	0.111	0.11	0.115	0.092	0.086	0.071	0.062	0.084	0.083	0.104	0.0589236	0.0703462	0.0813059	0.0302895	0.0401686	0.075253	0.0557177	0.0157995	0.0410655	0.0693114
4639.89	0.00269	0.00323	0.00382	0.00116	0.00141	0.00225	0.00146	0.000591606	0.0014	0.00303	0.111	0.11	0.115	0.092	0.086	0.071	0.062	0.084	0.083	0.104	0.0558114	0.0676245	0.0764997	0.0290378	0.0377585	0.0729824	0.0542319	0.0162199	0.0388458	0.067097
4641.82	0.0025	0.00314	0.00354	0.00112	0.00134	0.00215	0.00143	0.000608101	0.00135	0.00292	0.111	0.11	0.115	0.092	0.086	0.071	0.062	0.084	0.083	0.104	0.0518694	0.0657402	0.0708923	0.0280365	0.035884	0.0697387	0.0531176	0.0166721	0.0374584	0.0646612
4643.75	0.00231	0.00304	0.00325	0.00105	0.00128	0.00206	0.00139	0.000615746	0.00133	0.00278	0.111	0.11	0.115	0.092	0.086	0.071	0.062	0.084	0.083	0.104	0.0479273	0.0636465	0.0650848	0.0262842	0.0342772	0.0668194	0.0516318	0.0168817	0.0369035	0.061561
4645.68	0.00217	0.00291	0.00302	0.000943363	0.0012	0.00196	0.00135	0.000620007	0.0013	0.00264	0.111	0.11	0.115	0.092	0.086	0.071	0.062	0.084	0.083	0.104	0.0450226	0.0609248	0.0604788	0.0236148	0.0321349	0.0635758	0.050146	0.0169985	0.0360711	0.0584608
4647.6	0.00203	0.00273	0.00286	0.000876591	0.00112	0.00187	0.00126	0.000630811	0.00127	0.00249	0.111	0.11	0.115	0.092	0.086	0.071	0.062	0.084	0.083	0.104	0.0421179	0.0571563	0.0572746	0.0219434	0.0299926	0.0606565	0.0468029	0.0172947	0.0352387	0.0551391
4649.53	0.00186	0.00253	0.00271	0.000835627	0.00108	0.00179	0.00114	0.000660494	0.00126	0.00237	0.111	0.11	0.115	0.092	0.086	0.071	0.062	0.084	0.083	0.104	0.0385908	0.052969	0.0542707	0.0209179	0.0289214	0.0580615	0.0423455	0.0181085	0.0349612	0.0524818
4651.46	0.00171	0.00238	0.00258	0.000754982	0.00105	0.00173	0.00101	0.000703588	0.00127	0.00226	0.111	0.11	0.115	0.092	0.086	0.071	0.062	0.084	0.083	0.104	0.0354786	0.0498285	0.0516673	0.0188992	0.028118	0.0561154	0.0375166	0.01929	0.0352387	0.050046
4653.39	0.00162	0.00226	0.00244	0.000639677	0.00101	0.0017	0.000946462	0.000753462	0.00123	0.00214	0.111	0.11	0.115	0.092	0.086	0.071	0.062	0.084	0.083	0.104	0.0336114	0.0473162	0.0488637	0.0160128	0.0270469	0.0551423	0.0351565	0.0206574	0.0341288	0.0473887
4655.32	0.00154	0.00218	0.00228	0.000559524	0.000914201	0.00164	0.000917092	0.000766784	0.00113	0.00203	0.111	0.11	0.115	0.092	0.086	0.071	0.062	0.084	0.083	0.104	0.0319515	0.0456413	0.0456595	0.0140063	0.0244815	0.0531961	0.0340655	0.0210227	0.0313541	0.0449528
4657.25	0.0014	0.0021	0.00208	0.000524998	0.000845626	0.00155	0.000901178	0.000781	0.00099957	0.00195	0.111	0.11	0.115	0.092	0.086	0.071	0.062	0.084	0.083	0.104	0.0290468	0.0439664	0.0416543	0.0131421	0.0226451	0.0502768	0.0334744	0.0214124	0.0277351	0.0431812
4659.18	0.00124	0.002	0.00185	0.000512928	0.000814915	0.00143	0.000909716	0.000787497	0.000908583	0.00184	0.111	0.11	0.115	0.092	0.086	0.071	0.062	0.084	0.083	0.104	0.0257272	0.0418727	0.0370483	0.0128399	0.0218227	0.0463844	0.0337915	0.0215905	0.0252104	0.0407454
4661.1	0.00114	0.0019	0.00163	0.000470042	0.000776768	0.00137	0.000891954	0.00080061	0.000866592	0.00169	0.111	0.11	0.115	0.092	0.086	0.071	0.062	0.084	0.083	0.104	0.0236524	0.0397791	0.0326425	0.0117664	0.0208011	0.0444382	0.0331318	0.0219501	0.0240453	0.0374237
4663.03	0.00105	0.00179	0.00149	0.000399202	0.000710875	0.00136	0.000829682	0.000815928	0.000816062	0.00155	0.111	0.11	0.115	0.092	0.086	0.071	0.062	0.084	0.083	0.104	0.0217851	0.0374761	0.0298389	0.00999307	0.0190366	0.0441138	0.0308187	0.02237	0.0226433	0.0343236
4664.96	0.000934142	0.00165	0.00138	0.000332653	0.000607163	0.00134	0.000750437	0.000834659	0.000758722	0.00147	0.111	0.11	0.115	0.092	0.086	0.071	0.062	0.084	0.083	0.104	0.0193813	0.034545	0.027636	0.00832717	0.0162593	0.0434651	0.0278751	0.0228836	0.0210523	0.032552
4666.89	0.000834184	0.0015	0.00124	0.000271753	0.000528544	0.00125	0.000731915	0.000828013	0.000716806	0.00145	0.111	0.11	0.115	0.092	0.086	0.071	0.062	0.084	0.083	0.104	0.0173074	0.0314045	0.0248323	0.00680269	0.0141539	0.0405458	0.0271871	0.0227014	0.0198892	0.0321091
4668.82	0.000768634	0.00137	0.00105	0.000179872	0.000486717	0.00114	0.000742734	0.000803456	0.000697151	0.00141	0.111	0.11	0.115	0.092	0.086	0.071	0.062	0.084	0.083	0.104	0.0159474	0.0286828	0.0210274	0.00450267	0.0130338	0.0369777	0.027589	0.0220281	0.0193438	0.0312234
4670.75	0.000700893	0.00132	0.000883013	0.000108555	0.000441775	0.00107	0.000722721	0.000785217	0.000680924	0.00134	0.111	0.11	0.115	0.092	0.086	0.071	0.062	0.084	0.083	0.104	0.014542	0.027636	0.0176833	0.00271741	0.0118303	0.0347072	0.0268456	0.021528	0.0188936	0.0296733
4672.68	0.000626343	0.00132	0.000805974	0.000108242	0.000400007	0.00107	0.000677049	0.000843376	0.0006769	0.00126	0.111	0.11	0.115	0.092	0.086	0.071	0.062	0.084	0.083	0.104	0.0129952	0.027636	0.0161405	0.00270958	0.0107118	0.0347072	0.0251491	0.0231226	0.0187819	0.0279017
4674.6	0.000588046	0.00131	0.00075832	0.00012508	0.00038591	0.00106	0.000615701	0.000915512	0.000648677	0.0012	0.111	0.11	0.115	0.092	0.086	0.071	0.062	0.084	0.083	0.104	0.0122006	0.0274266	0.0151862	0.00313108	0.0103343	0.0343828	0.0228703	0.0251003	0.0179988	0.0265731
4676.53	0.000554594	0.00126	0.000708535	0.000133097	0.000389785	0.00103	0.000570863	0.000948966	0.000612467	0.00115	0.111	0.11	0.115	0.092	0.086	0.071	0.062	0.084	0.083	0.104	0.0115066	0.0263798	0.0141892	0.00333177	0.0104381	0.0334097	0.0212048	0.0260175	0.0169941	0.0254659
4678.46	0.000479939	0.00124	0.000692904	0.000142202	0.000379384	0.00101	0.000518382	0.000978634	0.000583947	0.00107	0.111	0.11	0.115	0.092	0.086	0.071	0.062	0.084	0.083	0.104	0.00995765	0.0259611	0.0138762	0.00355969	0.0101596	0.032761	0.0192554	0.0268309	0.0162028	0.0236943
4680.39	0.00041573	0.00122	0.000698656	0.000124812	0.000356704	0.000985309	0.000484481	0.00104	0.000581548	0.00102	0.111	0.11	0.115	0.092	0.086	0.071	0.062	0.084	0.083	0.104	0.00862546	0.0255424	0.0139913	0.00312437	0.0095522	0.0319601	0.0179961	0.0285133	0.0161362	0.0225871
4682.32	0.000410111	0.00121	0.000682458	9.82881e-05	0.000320643	0.000975266	0.000503853	0.00108	0.000597969	0.00104	0.111	0.11	0.115	0.092	0.086	0.071	0.062	0.084	0.083	0.104	0.00850888	0.025333	0.013667	0.00246041	0.00858652	0.0316343	0.0187157	0.02961	0.0165918	0.02303
4684.25	0.000426995	0.0012	0.000636101	8.82745e-05	0.000299946	0.000976384	0.000522688	0.00111	0.000631198	0.00108	0.111	0.11	0.115	0.092	0.086	0.071	0.062	0.084	0.083	0.104	0.00885918	0.0251236	0.0127386	0.00220974	0.00803227	0.0316706	0.0194153	0.0304325	0.0175138	0.0239158
4686.17	0.000442655	0.00117	0.000625879	9.28342e-05	0.000284985	0.000984281	0.000491649	0.00118	0.000640243	0.00109	0.111	0.11	0.115	0.092	0.086	0.071	0.062	0.084	0.083	0.104	0.00918409	0.0244955	0.0125339	0.00232388	0.00763163	0.0319267	0.0182624	0.0323517	0.0177648	0.0241372
4688.1	0.000479089	0.00109	0.000657007	9.53525e-05	0.000260055	0.000961393	0.000454575	0.00116	0.000643507	0.00105	0.111	0.11	0.115	0.092	0.086	0.071	0.062	0.084	0.083	0.104	0.00994002	0.0228206	0.0131573	0.00238692	0.00696403	0.0311843	0.0168853	0.0318033	0.0178554	0.0232514
4690.03	0.000573115	0.00104	0.000679866	5.79357e-05	0.000246137	0.000893995	0.00044401	0.00111	0.000642449	0.00095509	0.111	0.11	0.115	0.092	0.086	0.071	0.062	0.084	0.083	0.104	0.0118908	0.0217738	0.0136151	0.00145028	0.00659132	0.0289982	0.0164928	0.0304325	0.017826	0.0211497
4691.96	0.000642525	0.001	0.000613168	-7.24196e-06	0.000204906	0.000817433	0.00046365	0.000959754	0.000608325	0.000832737	0.111	0.11	0.115	0.092	0.086	0.071	0.062	0.084	0.083	0.104	0.0133309	0.0209364	0.0122794	-0.000181285	0.00548719	0.0265148	0.0172224	0.0263133	0.0168792	0.0184403
4693.89	0.000571312	0.000947684	0.000471473	-0.000142246	0.000109181	0.000740826	0.000449404	0.000772104	0.000526294	0.0006845	0.111	0.11	0.115	0.092	0.086	0.071	0.062	0.084	0.083	0.104	0.0118534	0.0198411	0.00944176	-0.00356079	0.00292377	0.0240299	0.0166932	0.0211685	0.0146031	0.0151577
4695.82	0.000402154	0.000839114	0.000364259	-0.000299171	-4.61936e-07	0.000641838	0.000375032	0.000586271	0.000455916	0.000530511	0.111	0.11	0.115	0.092	0.086	0.071	0.062	0.084	0.083	0.104	0.00834379	0.017568	0.00729468	-0.00748903	-1.23702e-05	0.0208191	0.0139306	0.0160736	0.0126503	0.0117478
4697.74	0.000345365	0.000790343	0.000376344	-0.000356048	-3.31551e-05	0.000600994	0.000302509	0.000475168	0.000429764	0.000482172	0.111	0.11	0.115	0.092	0.086	0.071	0.062	0.084	0.083	0.104	0.00716555	0.0165469	0.0075367	-0.00891281	-0.000887863	0.0194942	0.0112367	0.0130275	0.0119247	0.0106773
4699.67	0.000522614	0.000876456	0.000481889	-0.000255182	5.85467e-05	0.000675604	0.00033395	0.000516981	0.00046581	0.000550896	0.111	0.11	0.115	0.092	0.086	0.071	0.062	0.084	0.083	0.104	0.0108431	0.0183498	0.00965035	-0.00638787	0.00156783	0.0219143	0.0124046	0.0141739	0.0129248	0.0121992
4701.6	0.000815661	0.00107	0.000679791	-8.32826e-05	0.000216574	0.000777855	0.000410676	0.000683919	0.000532225	0.000652626	0.111	0.11	0.115	0.092	0.086	0.071	0.062	0.084	0.083	0.104	0.0169231	0.0224019	0.0136136	-0.00208478	0.00579965	0.025231	0.0152546	0.0187508	0.0147676	0.0144519
4703.53	0.00105	0.00124	0.000843093	9.34899e-05	0.000376895	0.000862449	0.000474364	0.000881746	0.000607505	0.000751212	0.111	0.11	0.115	0.092	0.086	0.071	0.062	0.084	0.083	0.104	0.0217851	0.0259611	0.0168839	0.0023403	0.0100929	0.0279749	0.0176203	0.0241745	0.0168564	0.016635
4705.46	0.00127	0.00136	0.000938535	0.000239492	0.000508383	0.000942454	0.000530049	0.00103	0.000720411	0.000823304	0.111	0.11	0.115	0.092	0.086	0.071	0.062	0.084	0.083	0.104	0.0263496	0.0284735	0.0187952	0.00599511	0.013614	0.03057	0.0196888	0.0282392	0.0199892	0.0182314
4707.39	0.00145	0.00147	0.00103	0.000327855	0.000599906	0.00103	0.000613332	0.00108	0.000849321	0.000870839	0.111	0.11	0.115	0.092	0.086	0.071	0.062	0.084	0.083	0.104	0.0300842	0.0307765	0.0206269	0.00820707	0.0160649	0.0334097	0.0227823	0.02961	0.0235661	0.0192841
4709.32	0.00159	0.00158	0.00114	0.000364825	0.000665709	0.00108	0.000699222	0.00107	0.000932082	0.000917137	0.111	0.11	0.115	0.092	0.086	0.071	0.062	0.084	0.083	0.104	0.0329889	0.0330795	0.0228297	0.00913252	0.0178271	0.0350315	0.0259727	0.0293358	0.0258625	0.0203093
4711.24	0.0017	0.00169	0.00125	0.000404552	0.000716925	0.00114	0.000752062	0.00108	0.000948101	0.000937	0.111	0.11	0.115	0.092	0.086	0.071	0.062	0.084	0.083	0.104	0.0352712	0.0353825	0.0250326	0.010127	0.0191986	0.0369777	0.0279355	0.02961	0.0263069	0.0207491
4713.17	0.0018	0.00178	0.0013	0.00049071	0.000771254	0.00121	0.000754774	0.00115	0.000946865	0.000948787	0.111	0.11	0.115	0.092	0.086	0.071	0.062	0.084	0.083	0.104	0.0373459	0.0372667	0.0260339	0.0122838	0.0206535	0.0392483	0.0280362	0.0315292	0.0262727	0.0210102
4715.1	0.0019	0.00182	0.00133	0.000610575	0.000854343	0.00126	0.000786603	0.00123	0.00097093	0.000967115	0.111	0.11	0.115	0.092	0.086	0.071	0.062	0.084	0.083	0.104	0.0394207	0.0381042	0.0266347	0.0152843	0.0228785	0.0408701	0.0292185	0.0337225	0.0269404	0.021416
4717.03	0.002	0.00185	0.00141	0.000704348	0.000948906	0.00127	0.000878632	0.00126	0.00101	0.001	0.111	0.11	0.115	0.092	0.086	0.071	0.062	0.084	0.083	0.104	0.0414955	0.0387323	0.0282368	0.0176317	0.0254108	0.0411945	0.0326369	0.034545	0.0280245	0.0221442
4718.96	0.00214	0.00193	0.00156	0.000755876	0.00101	0.0013	0.000953749	0.00127	0.00105	0.00106	0.111	0.11	0.115	0.092	0.086	0.071	0.062	0.084	0.083	0.104	0.0444002	0.0404072	0.0312407	0.0189215	0.0270469	0.0421676	0.0354272	0.0348192	0.0291343	0.0234729
4720.89	0.00233	0.00204	0.0017	0.000777125	0.00107	0.00135	0.00096789	0.00132	0.00106	0.00111	0.111	0.11	0.115	0.092	0.086	0.071	0.062	0.084	0.083	0.104	0.0483423	0.0427102	0.0340443	0.0194535	0.0286536	0.0437894	0.0359524	0.03619	0.0294118	0.0245801
4722.81	0.00249	0.00216	0.00179	0.00081563	0.00117	0.00145	0.00095363	0.00142	0.00108	0.00114	0.111	0.11	0.115	0.092	0.086	0.071	0.062	0.084	0.083	0.104	0.0516619	0.0452225	0.0358467	0.0204173	0.0313315	0.0470331	0.0354227	0.0389317	0.0299667	0.0252444
4724.74	0.00259	0.00228	0.00183	0.000892952	0.0013	0.00156	0.000977725	0.0015	0.00113	0.00121	0.111	0.11	0.115	0.092	0.086	0.071	0.062	0.084	0.083	0.104	0.0537367	0.0477349	0.0366477	0.0223529	0.0348128	0.0506011	0.0363178	0.041125	0.0313541	0.0267945
4726.67	0.00266	0.00236	0.00185	0.00101	0.0014	0.00166	0.00104	0.00155	0.00121	0.00128	0.111	0.11	0.115	0.092	0.086	0.071	0.062	0.084	0.083	0.104	0.055189	0.0494098	0.0370483	0.0252829	0.0374907	0.0538448	0.038631	0.0424958	0.0335739	0.0283446
4728.6	0.00275	0.00242	0.00193	0.00111	0.00149	0.00174	0.00108	0.00158	0.00131	0.00133	0.111	0.11	0.115	0.092	0.086	0.071	0.062	0.084	0.083	0.104	0.0570563	0.050666	0.0386503	0.0277862	0.0399008	0.0564397	0.0401168	0.0433183	0.0363486	0.0294518
4730.53	0.00287	0.0025	0.0021	0.00117	0.00155	0.00181	0.0011	0.00162	0.00141	0.00137	0.111	0.11	0.115	0.092	0.086	0.071	0.062	0.084	0.083	0.104	0.059546	0.0523409	0.0420548	0.0292882	0.0415076	0.0587103	0.0408597	0.044415	0.0391233	0.0303376
4732.46	0.00299	0.0026	0.00226	0.00117	0.00157	0.00186	0.00118	0.00172	0.00147	0.00141	0.111	0.11	0.115	0.092	0.086	0.071	0.062	0.084	0.083	0.104	0.0620358	0.0544345	0.045259	0.0292882	0.0420431	0.0603321	0.0438313	0.0471567	0.0407881	0.0312234
4734.39	0.0031	0.0027	0.0024	0.0012	0.00162	0.00189	0.00131	0.00179	0.00148	0.00144	0.111	0.11	0.115	0.092	0.086	0.071	0.062	0.084	0.083	0.104	0.064318	0.0565282	0.0480626	0.0300391	0.0433821	0.0613052	0.0486602	0.0490758	0.0410655	0.0318877
4736.31	0.00324	0.0028	0.00251	0.00131	0.00172	0.00193	0.0014	0.00181	0.00146	0.0014	0.111	0.11	0.115	0.092	0.086	0.071	0.062	0.084	0.083	0.104	0.0672227	0.0586218	0.0502655	0.0327927	0.04606	0.0626027	0.0520032	0.0496242	0.0405106	0.0310019
4738.24	0.00337	0.00289	0.00261	0.00146	0.00182	0.00197	0.0014	0.00183	0.00145	0.00136	0.111	0.11	0.115	0.092	0.086	0.071	0.062	0.084	0.083	0.104	0.0699199	0.0605061	0.0522681	0.0365476	0.0487379	0.0639001	0.0520032	0.0501725	0.0402331	0.0301162
4740.17	0.00345	0.00298	0.0027	0.00156	0.00187	0.002	0.00136	0.00189	0.0015	0.00136	0.111	0.11	0.115	0.092	0.086	0.071	0.062	0.084	0.083	0.104	0.0715797	0.0623904	0.0540704	0.0390509	0.0500769	0.0648732	0.0505174	0.0518175	0.0416205	0.0301162
4742.1	0.00346	0.00307	0.00272	0.00158	0.00189	0.002	0.00136	0.00197	0.00158	0.00143	0.111	0.11	0.115	0.092	0.086	0.071	0.062	0.084	0.083	0.104	0.0717872	0.0642746	0.054471	0.0395515	0.0506124	0.0648732	0.0505174	0.0540108	0.0438402	0.0316662
4744.03	0.00342	0.00313	0.00266	0.00156	0.0019	0.00201	0.0014	0.00206	0.00165	0.0015	0.111	0.11	0.115	0.092	0.086	0.071	0.062	0.084	0.083	0.104	0.0709573	0.0655308	0.0532694	0.0390509	0.0508802	0.0651976	0.0520032	0.0564783	0.0457825	0.0332163
4745.96	0.00339	0.00313	0.00267	0.00156	0.0019	0.00204	0.00145	0.0021	0.00167	0.00157	0.111	0.11	0.115	0.092	0.086	0.071	0.062	0.084	0.083	0.104	0.0703349	0.0655308	0.0534697	0.0390509	0.0508802	0.0661707	0.0538605	0.057575	0.0463375	0.0347664
4747.89	0.00338	0.00305	0.00279	0.00157	0.00189	0.00206	0.00148	0.00208	0.00168	0.00159	0.111	0.11	0.115	0.092	0.086	0.071	0.062	0.084	0.083	0.104	0.0701274	0.0638559	0.0558728	0.0393012	0.0506124	0.0668194	0.0549748	0.0570267	0.0466149	0.0352093
4749.81	0.00338	0.00296	0.00286	0.00159	0.00187	0.00204	0.00149	0.00204	0.00167	0.00156	0.111	0.11	0.115	0.092	0.086	0.071	0.062	0.084	0.083	0.104	0.0701274	0.0619716	0.0572746	0.0398018	0.0500769	0.0661707	0.0553463	0.05593	0.0463375	0.034545
4751.74	0.00334	0.00292	0.00276	0.00156	0.00185	0.00197	0.00147	0.00195	0.00168	0.00151	0.111	0.11	0.115	0.092	0.086	0.071	0.062	0.084	0.083	0.104	0.0692975	0.0611342	0.055272	0.0390509	0.0495413	0.0639001	0.0546034	0.0534625	0.0466149	0.0334378
4753.67	0.00325	0.00292	0.00259	0.00151	0.00183	0.00188	0.00144	0.0018	0.00165	0.00144	0.111	0.11	0.115	0.092	0.086	0.071	0.062	0.084	0.083	0.104	0.0674302	0.0611342	0.0518676	0.0377992	0.0490057	0.0609808	0.053489	0.04935	0.0457825	0.0318877
4755.6	0.00314	0.00288	0.00249	0.00141	0.00176	0.00176	0.00137	0.00163	0.00152	0.00128	0.111	0.11	0.115	0.092	0.086	0.071	0.062	0.084	0.083	0.104	0.0651479	0.0602967	0.049865	0.035296	0.0471312	0.0570885	0.0508889	0.0446892	0.0421754	0.0283446
4757.53	0.00299	0.00277	0.00243	0.00128	0.00162	0.00165	0.00132	0.00151	0.00139	0.00111	0.111	0.11	0.115	0.092	0.086	0.071	0.062	0.084	0.083	0.104	0.0620358	0.0579937	0.0486634	0.0320417	0.0433821	0.0535204	0.0490316	0.0413992	0.0385683	0.0245801
4759.46	0.00275	0.00262	0.00234	0.00113	0.00152	0.0015	0.00126	0.0014	0.00134	0.000983954	0.111	0.11	0.115	0.092	0.086	0.071	0.062	0.084	0.083	0.104	0.0570563	0.0548533	0.046861	0.0282868	0.0407042	0.0486549	0.0468029	0.0383833	0.037181	0.0217889
4761.38	0.0025	0.00248	0.00219	0.001	0.00147	0.00136	0.00115	0.00128	0.00129	0.000876829	0.111	0.11	0.115	0.092	0.086	0.071	0.062	0.084	0.083	0.104	0.0518694	0.0519222	0.0438571	0.0250326	0.0393652	0.0441138	0.0427169	0.0350933	0.0357936	0.0194167
4763.31	0.00231	0.00238	0.00196	0.000873804	0.00137	0.00126	0.00104	0.00116	0.00115	0.000757813	0.111	0.11	0.115	0.092	0.086	0.071	0.062	0.084	0.083	0.104	0.0479273	0.0498285	0.0392511	0.0218736	0.0366873	0.0408701	0.038631	0.0318033	0.031909	0.0167812
4765.24	0.00213	0.00224	0.00171	0.000740737	0.00125	0.00114	0.000985414	0.00103	0.000978589	0.000608966	0.111	0.11	0.115	0.092	0.086	0.071	0.062	0.084	0.083	0.104	0.0441927	0.0468975	0.0342446	0.0185426	0.0334738	0.0369777	0.0366034	0.0282392	0.0271529	0.0134851
4767.17	0.00188	0.002	0.0015	0.000573516	0.00116	0.000983417	0.000924855	0.000886828	0.000812635	0.000438556	0.111	0.11	0.115	0.092	0.086	0.071	0.062	0.084	0.083	0.104	0.0390058	0.0418727	0.0300391	0.0143566	0.0310637	0.0318987	0.0343539	0.0243139	0.0225482	0.00971149
4769.1	0.00157	0.00176	0.00136	0.000366092	0.00105	0.000837624	0.000816852	0.000755638	0.000670955	0.000301823	0.111	0.11	0.115	0.092	0.086	0.071	0.062	0.084	0.083	0.104	0.032574	0.036848	0.0272355	0.00916424	0.028118	0.0271697	0.0303421	0.0207171	0.018617	0.00668364
4771.03	0.00128	0.00158	0.0012	0.000177607	0.0008903	0.000703007	0.00068149	0.000616849	0.000584453	0.000239402	0.111	0.11	0.115	0.092	0.086	0.071	0.062	0.084	0.083	0.104	0.0265571	0.0330795	0.0240313	0.00444597	0.0238414	0.0228032	0.0253141	0.0169119	0.0162168	0.00530137
4772.95	0.00106	0.00148	0.000999808	6.65486e-05	0.000742272	0.000586063	0.000588521	0.000473172	0.000546038	0.00018242	0.111	0.11	0.115	0.092	0.086	0.071	0.062	0.084	0.083	0.104	0.0219926	0.0309858	0.0200222	0.00166589	0.0198774	0.0190099	0.0218607	0.0129728	0.0151509	0.00403955
4774.88	0.000909419	0.00141	0.000768066	-7.01845e-06	0.000622973	0.000489086	0.000567734	0.000406027	0.00052698	0.00013496	0.111	0.11	0.115	0.092	0.086	0.071	0.062	0.084	0.083	0.104	0.0188684	0.0295203	0.0153814	-0.00017569	0.0166826	0.0158643	0.0210886	0.0111319	0.0146221	0.00298859
4776.81	0.000767053	0.00128	0.000578761	-8.69185e-05	0.000522658	0.000410989	0.000590891	0.00046663	0.000504911	0.000133827	0.111	0.11	0.115	0.092	0.086	0.071	0.062	0.084	0.083	0.104	0.0159146	0.0267985	0.0115903	-0.0021758	0.0139963	0.0133311	0.0219487	0.0127934	0.0140098	0.0029635
4778.74	0.000607762	0.00119	0.000463858	-0.000153899	0.000464141	0.000360519	0.000613466	0.000569925	0.000447303	0.000156328	0.111	0.11	0.115	0.092	0.086	0.071	0.062	0.084	0.083	0.104	0.0126097	0.0249143	0.00928926	-0.00385249	0.0124293	0.011694	0.0227873	0.0156254	0.0124113	0.00346176
4780.67	0.000499553	0.00111	0.00037311	-0.000203147	0.000465497	0.00029245	0.000579238	0.000623077	0.000426218	0.000222921	0.111	0.11	0.115	0.092	0.086	0.071	0.062	0.084	0.083	0.104	0.0103646	0.0232394	0.00747193	-0.0050853	0.0124656	0.00948609	0.0215159	0.0170827	0.0118263	0.00493641
4782.6	0.00046908	0.00101	0.000284359	-0.000272781	0.000514954	0.000237957	0.000587657	0.000655696	0.000488341	0.000274092	0.111	0.11	0.115	0.092	0.086	0.071	0.062	0.084	0.083	0.104	0.00973235	0.0211457	0.0056946	-0.00682842	0.01379	0.00771852	0.0218286	0.017977	0.01355	0.00606956
4784.53	0.00045394	0.000925079	0.000264809	-0.000311181	0.000583783	0.000197694	0.000600249	0.000687063	0.000534952	0.000331581	0.111	0.11	0.115	0.092	0.086	0.071	0.062	0.084	0.083	0.104	0.00941823	0.0193678	0.00530309	-0.00778967	0.0156332	0.00641253	0.0222963	0.018837	0.0148433	0.00734261
4786.45	0.000447371	0.000881374	0.000293821	-0.000309676	0.000649601	0.000206024	0.000602856	0.000701711	0.000547692	0.000347436	0.111	0.11	0.115	0.092	0.086	0.071	0.062	0.084	0.083	0.104	0.00928194	0.0184528	0.00588408	-0.007752	0.0173957	0.00668272	0.0223932	0.0192386	0.0151968	0.0076937
4788.38	0.000445377	0.000925437	0.000303611	-0.000282332	0.000684455	0.000231847	0.000595436	0.000769719	0.000558615	0.000315204	0.111	0.11	0.115	0.092	0.086	0.071	0.062	0.084	0.083	0.104	0.00924057	0.0193753	0.00608014	-0.00706751	0.0183291	0.00752033	0.0221176	0.0211031	0.0154999	0.00697995
4790.31	0.000423383	0.000970066	0.000297219	-0.000234664	0.000726357	0.000217214	0.000575766	0.00090155	0.000582978	0.000280037	0.111	0.11	0.115	0.092	0.086	0.071	0.062	0.084	0.083	0.104	0.00878424	0.0203097	0.00595213	-0.00587425	0.0194512	0.00704569	0.0213869	0.0247175	0.0161759	0.0062012
4792.24	0.000407319	0.000947312	0.000355318	-0.000236124	0.000801563	0.000162154	0.000556797	0.00103	0.00059554	0.000263661	0.111	0.11	0.115	0.092	0.086	0.071	0.062	0.084	0.083	0.104	0.00845095	0.0198333	0.00711563	-0.0059108	0.0214651	0.00525973	0.0206823	0.0282392	0.0165244	0.00583857
4794.17	0.000445051	0.000893563	0.000479594	-0.000267371	0.000804603	0.000115305	0.000582948	0.00109	0.000577062	0.000261918	0.111	0.11	0.115	0.092	0.086	0.071	0.062	0.084	0.083	0.104	0.00923381	0.018708	0.00960439	-0.00669299	0.0215465	0.0037401	0.0216537	0.0298842	0.0160117	0.00579997
4796.1	0.000525431	0.00087902	0.000595078	-0.000248358	0.000780791	8.61585e-05	0.000635356	0.00114	0.000551507	0.000254884	0.111	0.11	0.115	0.092	0.086	0.071	0.062	0.084	0.083	0.104	0.0109015	0.0184035	0.0119171	-0.00621705	0.0209089	0.00279469	0.0236004	0.031255	0.0153027	0.00564421
4798.02	0.00059642	0.000894979	0.000661895	-0.000207171	0.000786215	9.45479e-05	0.000645146	0.00129	0.000525937	0.00023444	0.111	0.11	0.115	0.092	0.086	0.071	0.062	0.084	0.083	0.104	0.0123744	0.0187376	0.0132552	-0.00518603	0.0210541	0.00306681	0.0239641	0.0353675	0.0145932	0.00519149
4799.95	0.000604116	0.000906915	0.000613451	-0.000227377	0.000812143	0.000125349	0.000648439	0.00147	0.000500366	0.000228032	0.111	0.11	0.115	0.092	0.086	0.071	0.062	0.084	0.083	0.104	0.012534	0.0189875	0.012285	-0.00569184	0.0217484	0.0040659	0.0240864	0.0403025	0.0138836	0.00504959
4801.88	0.000596078	0.000916466	0.000566781	-0.000272125	0.000824049	0.000199452	0.000680432	0.00162	0.000474811	0.000238568	0.111	0.11	0.115	0.092	0.086	0.071	0.062	0.084	0.083	0.104	0.0123673	0.0191875	0.0113504	-0.006812	0.0220673	0.00646955	0.0252748	0.044415	0.0131746	0.0052829
4803.81	0.000619436	0.000922605	0.000534326	-0.000258923	0.00082016	0.000263497	0.000719517	0.00174	0.000445828	0.000222877	0.111	0.11	0.115	0.092	0.086	0.071	0.062	0.084	0.083	0.104	0.0128519	0.019316	0.0107005	-0.00648152	0.0219631	0.00854695	0.0267266	0.047705	0.0123704	0.00493544
4805.74	0.000660958	0.000953928	0.000545874	-0.000198275	0.000825733	0.000271305	0.000759751	0.00185	0.000438586	0.000214189	0.111	0.11	0.115	0.092	0.086	0.071	0.062	0.084	0.083	0.104	0.0137134	0.0199718	0.0109317	-0.00496334	0.0221124	0.00880022	0.0282211	0.0507208	0.0121694	0.00474305
4807.67	0.000705803	0.001	0.000604332	-0.000164434	0.000883311	0.000236258	0.000787795	0.002	0.000471234	0.000239953	0.111	0.11	0.115	0.092	0.086	0.071	0.062	0.084	0.083	0.104	0.0146438	0.0209364	0.0121024	-0.00411621	0.0236542	0.00766341	0.0292628	0.0548333	0.0130753	0.00531357
4809.6	0.000738416	0.00105	0.000674591	-0.00015226	0.000929877	0.000204831	0.00083977	0.00222	0.000530928	0.000245407	0.111	0.11	0.115	0.092	0.086	0.071	0.062	0.084	0.083	0.104	0.0153205	0.0219832	0.0135094	-0.00381146	0.0249012	0.00664403	0.0311934	0.060865	0.0147317	0.00543435
4811.52	0.000792471	0.00107	0.000728428	-0.000115067	0.00094302	0.000230685	0.000897691	0.0024	0.000602171	0.000249073	0.111	0.11	0.115	0.092	0.086	0.071	0.062	0.084	0.083	0.104	0.016442	0.0224019	0.0145876	-0.00288043	0.0252532	0.00748264	0.0333449	0.0658	0.0167084	0.00551553
4813.45	0.000874554	0.00111	0.000773311	-7.26283e-05	0.000950173	0.000270829	0.000966653	0.00254	0.000627711	0.000281408	0.111	0.11	0.115	0.092	0.086	0.071	0.062	0.084	0.083	0.104	0.018145	0.0232394	0.0154864	-0.00181808	0.0254447	0.00878478	0.0359065	0.0696383	0.0174171	0.00623156
4815.38	0.000934911	0.00117	0.000781938	-8.28654e-05	0.000950843	0.000314355	0.00103	0.00269	0.000585273	0.000322014	0.111	0.11	0.115	0.092	0.086	0.071	0.062	0.084	0.083	0.104	0.0193973	0.0244955	0.0156592	-0.00207434	0.0254627	0.0101966	0.0382595	0.0737508	0.0162396	0.00713075
4817.31	0.000985822	0.00124	0.000765443	-0.000130594	0.000931635	0.000335067	0.00104	0.00289	0.000531629	0.00035502	0.111	0.11	0.115	0.092	0.086	0.071	0.062	0.084	0.083	0.104	0.0204536	0.0259611	0.0153288	-0.00326911	0.0249483	0.0108684	0.038631	0.0792342	0.0147511	0.00786164
4819.24	0.00105	0.00126	0.000795692	-0.000146121	0.000899672	0.000318915	0.00101	0.00313	0.000520751	0.000374571	0.111	0.11	0.115	0.092	0.086	0.071	0.062	0.084	0.083	0.104	0.0217851	0.0263798	0.0159346	-0.00365779	0.0240924	0.0103445	0.0375166	0.0858142	0.0144493	0.00829459
4821.17	0.00113	0.00126	0.000868782	-9.72003e-05	0.000926733	0.000318482	0.00101	0.00336	0.00054346	0.00040929	0.111	0.11	0.115	0.092	0.086	0.071	0.062	0.084	0.083	0.104	0.023445	0.0263798	0.0173983	-0.00243318	0.024817	0.0103305	0.0375166	0.09212	0.0150794	0.00906341
4823.1	0.0012	0.00124	0.000934929	-3.17246e-05	0.000990242	0.000349164	0.00105	0.00356	0.000610605	0.000451043	0.111	0.11	0.115	0.092	0.086	0.071	0.062	0.084	0.083	0.104	0.0248973	0.0259611	0.018723	-0.000794149	0.0265178	0.0113257	0.0390024	0.0976033	0.0169424	0.009988
4825.02	0.00128	0.00124	0.000968918	1.8537e-05	0.00104	0.000407979	0.00111	0.00373	0.000677809	0.000477552	0.111	0.11	0.115	0.092	0.086	0.071	0.062	0.084	0.083	0.104	0.0265571	0.0259611	0.0194036	0.000464029	0.0278502	0.0132335	0.0412311	0.102264	0.0188072	0.010575
4826.95	0.00137	0.00131	0.000997648	5.22435e-05	0.00108	0.000450954	0.00115	0.00392	0.000677809	0.000478372	0.111	0.11	0.115	0.092	0.086	0.071	0.062	0.084	0.083	0.104	0.0284244	0.0274266	0.019979	0.00130779	0.0289214	0.0146274	0.0427169	0.107473	0.0188072	0.0105932
4828.88	0.00145	0.00144	0.00108	3.28273e-05	0.00114	0.000443012	0.00117	0.00415	0.00066185	0.000494972	0.111	0.11	0.115	0.092	0.086	0.071	0.062	0.084	0.083	0.104	0.0300842	0.0301484	0.0216282	0.000821753	0.0305281	0.0143698	0.0434598	0.113779	0.0183643	0.0109608
4830.81	0.00154	0.00152	0.00117	2.50638e-05	0.0012	0.000414014	0.0012	0.00434	0.000710696	0.000563636	0.111	0.11	0.115	0.092	0.086	0.071	0.062	0.084	0.083	0.104	0.0319515	0.0318233	0.0234305	0.000627412	0.0321349	0.0134292	0.0445742	0.118988	0.0197197	0.0124813
4832.74	0.00162	0.00148	0.00123	0.000114381	0.00122	0.000452757	0.00125	0.00449	0.000775516	0.000641212	0.111	0.11	0.115	0.092	0.086	0.071	0.062	0.084	0.083	0.104	0.0336114	0.0309858	0.0246321	0.00286325	0.0326705	0.0146859	0.0464315	0.123101	0.0215182	0.0141991
4834.67	0.00167	0.00143	0.00129	0.000241295	0.00118	0.000534952	0.00127	0.00462	0.000777841	0.000678331	0.111	0.11	0.115	0.092	0.086	0.071	0.062	0.084	0.083	0.104	0.0346487	0.029939	0.0258337	0.00604024	0.0315993	0.017352	0.0471744	0.126665	0.0215827	0.0150211
4836.6	0.00168	0.00148	0.00134	0.000273481	0.00114	0.000571713	0.00127	0.00475	0.000752374	0.000665471	0.111	0.11	0.115	0.092	0.086	0.071	0.062	0.084	0.083	0.104	0.0348562	0.0309858	0.026835	0.00684594	0.0305281	0.0185444	0.0471744	0.130229	0.0208761	0.0147363
4838.52	0.00169	0.00159	0.00138	0.000191391	0.00111	0.000572056	0.0013	0.00489	0.000740871	0.000592351	0.111	0.11	0.115	0.092	0.086	0.071	0.062	0.084	0.083	0.104	0.0350637	0.0332888	0.027636	0.00479102	0.0297248	0.0185556	0.0482887	0.134067	0.0205569	0.0131172
4840.45	0.00179	0.00167	0.00145	0.000127673	0.00114	0.000601471	0.00133	0.00501	0.000741765	0.000531972	0.111	0.11	0.115	0.092	0.086	0.071	0.062	0.084	0.083	0.104	0.0371385	0.0349637	0.0290378	0.00319599	0.0305281	0.0195097	0.0494031	0.137357	0.0205817	0.0117801
4842.38	0.00193	0.00173	0.00161	0.000172257	0.00122	0.000651494	0.00136	0.00515	0.000752658	0.000553027	0.111	0.11	0.115	0.092	0.086	0.071	0.062	0.084	0.083	0.104	0.0400432	0.0362199	0.032242	0.00431204	0.0326705	0.0211323	0.0505174	0.141196	0.020884	0.0122464
4844.31	0.00204	0.00181	0.00173	0.000267535	0.00129	0.000693262	0.0014	0.00531	0.000772402	0.000650406	0.111	0.11	0.115	0.092	0.086	0.071	0.062	0.084	0.083	0.104	0.0423254	0.0378948	0.0346451	0.0066971	0.034545	0.0224871	0.0520032	0.145582	0.0214318	0.0144027
4846.24	0.0021	0.00189	0.00176	0.000320822	0.00132	0.000676632	0.00142	0.00545	0.000809729	0.00075379	0.111	0.11	0.115	0.092	0.086	0.071	0.062	0.084	0.083	0.104	0.0435703	0.0395697	0.0352459	0.00803101	0.0353484	0.0219477	0.0527461	0.149421	0.0224675	0.0166921
4848.17	0.00214	0.00195	0.00178	0.000311449	0.00131	0.000647515	0.00142	0.00555	0.000868216	0.000787035	0.111	0.11	0.115	0.092	0.086	0.071	0.062	0.084	0.083	0.104	0.0444002	0.0408259	0.0356464	0.00779638	0.0350806	0.0210032	0.0527461	0.152163	0.0240904	0.0174283
4850.09	0.00219	0.00199	0.00185	0.000314757	0.00133	0.000669807	0.00145	0.00569	0.000944808	0.000760377	0.111	0.11	0.115	0.092	0.086	0.071	0.062	0.084	0.083	0.104	0.0454376	0.0416634	0.0370483	0.00787919	0.0356162	0.0217263	0.0538605	0.156001	0.0262156	0.016838
4852.02	0.00226	0.00201	0.00192	0.000402927	0.00141	0.000731587	0.00156	0.00583	0.000991136	0.000758693	0.111	0.11	0.115	0.092	0.086	0.071	0.062	0.084	0.083	0.104	0.0468899	0.0420821	0.0384501	0.0100863	0.0377585	0.0237302	0.0579465	0.159839	0.027501	0.0168007
4853.95	0.00234	0.00204	0.00196	0.000550345	0.0015	0.000809297	0.00167	0.00593	0.00101	0.000835478	0.111	0.11	0.115	0.092	0.086	0.071	0.062	0.084	0.083	0.104	0.0485497	0.0427102	0.0392511	0.0137766	0.0401686	0.0262509	0.0620324	0.162581	0.0280245	0.018501
4855.88	0.00244	0.00213	0.00202	0.000623316	0.00155	0.000890568	0.00178	0.00604	0.00103	0.000962317	0.111	0.11	0.115	0.092	0.086	0.071	0.062	0.084	0.083	0.104	0.0506245	0.0445945	0.0404527	0.0156032	0.0415076	0.028887	0.0661184	0.165597	0.0285794	0.0213098
4857.81	0.00255	0.00222	0.00211	0.000621691	0.00157	0.000968829	0.00187	0.00619	0.00102	0.00107	0.111	0.11	0.115	0.092	0.086	0.071	0.062	0.084	0.083	0.104	0.0529068	0.0464787	0.042255	0.0155625	0.0420431	0.0314255	0.0694615	0.169709	0.0283019	0.0236943
4859.74	0.00264	0.00229	0.00226	0.00065361	0.00161	0.001	0.0019	0.00632	0.00103	0.00111	0.111	0.11	0.115	0.092	0.086	0.071	0.062	0.084	0.083	0.104	0.0547741	0.0479443	0.045259	0.0163616	0.0431143	0.0324366	0.0705758	0.173273	0.0285794	0.0245801
4861.66	0.00274	0.00238	0.00238	0.000760362	0.00167	0.00101	0.0019	0.0064	0.00105	0.00109	0.111	0.11	0.115	0.092	0.086	0.071	0.062	0.084	0.083	0.104	0.0568488	0.0498285	0.0476621	0.0190338	0.044721	0.032761	0.0705758	0.175467	0.0291343	0.0241372
4863.59	0.00286	0.00247	0.00244	0.000829607	0.00173	0.00105	0.00196	0.00648	0.00109	0.00104	0.111	0.11	0.115	0.092	0.086	0.071	0.062	0.084	0.083	0.104	0.0593386	0.0517128	0.0488637	0.0207672	0.0463278	0.0340585	0.0728045	0.17766	0.0302442	0.02303
4865.52	0.00298	0.00248	0.0025	0.000813246	0.00177	0.00111	0.00207	0.00656	0.00111	0.00104	0.111	0.11	0.115	0.092	0.086	0.071	0.062	0.084	0.083	0.104	0.0618283	0.0519222	0.0500652	0.0203577	0.047399	0.0360046	0.0768905	0.179853	0.0307992	0.02303
4867.45	0.00311	0.00249	0.0026	0.000762001	0.00178	0.0011	0.00216	0.0067	0.00115	0.0011	0.111	0.11	0.115	0.092	0.086	0.071	0.062	0.084	0.083	0.104	0.0645255	0.0521315	0.0520678	0.0190749	0.0476667	0.0356803	0.0802335	0.183692	0.031909	0.0243587
4869.38	0.00325	0.00256	0.00271	0.000753865	0.00181	0.00109	0.0022	0.0069	0.0012	0.0012	0.111	0.11	0.115	0.092	0.086	0.071	0.062	0.084	0.083	0.104	0.0674302	0.0535971	0.0542707	0.0188712	0.0484701	0.0353559	0.0817194	0.189175	0.0332964	0.0265731
4871.31	0.00345	0.00263	0.00283	0.000812605	0.00185	0.00114	0.00222	0.00703	0.00124	0.0013	0.111	0.11	0.115	0.092	0.086	0.071	0.062	0.084	0.083	0.104	0.0715797	0.0550626	0.0566738	0.0203416	0.0495413	0.0369777	0.0824623	0.192739	0.0344063	0.0287875
4873.23	0.00366	0.00273	0.00292	0.000889227	0.00191	0.00121	0.00225	0.00715	0.00125	0.00133	0.111	0.11	0.115	0.092	0.086	0.071	0.062	0.084	0.083	0.104	0.0759368	0.0571563	0.0584762	0.0222597	0.051148	0.0392483	0.0835766	0.196029	0.0346837	0.0294518
4875.16	0.0038	0.00284	0.00301	0.000935122	0.002	0.00125	0.0023	0.00733	0.00127	0.00134	0.111	0.11	0.115	0.092	0.086	0.071	0.062	0.084	0.083	0.104	0.0788414	0.0594593	0.0602785	0.0234085	0.0535581	0.0405458	0.0854339	0.200964	0.0352387	0.0296733
4877.09	0.0039	0.00293	0.00309	0.00101	0.00206	0.00128	0.0024	0.00752	0.0013	0.00141	0.111	0.11	0.115	0.092	0.086	0.071	0.062	0.084	0.083	0.104	0.0809162	0.0613435	0.0618806	0.0252829	0.0551649	0.0415189	0.0891484	0.206173	0.0360711	0.0312234
4879.02	0.004	0.00301	0.00321	0.00112	0.00203	0.00133	0.0025	0.00768	0.00137	0.00152	0.111	0.11	0.115	0.092	0.086	0.071	0.062	0.084	0.083	0.104	0.082991	0.0630185	0.0642837	0.0280365	0.0543615	0.0431407	0.0928629	0.21056	0.0380134	0.0336592
4880.95	0.00416	0.00308	0.0034	0.00119	0.00202	0.0014	0.00252	0.00784	0.00145	0.00158	0.111	0.11	0.115	0.092	0.086	0.071	0.062	0.084	0.083	0.104	0.0863106	0.064484	0.0680887	0.0297888	0.0540937	0.0454113	0.0936058	0.214947	0.0402331	0.0349879
4882.88	0.00434	0.00318	0.00361	0.00119	0.00209	0.00148	0.00251	0.008	0.00152	0.00161	0.111	0.11	0.115	0.092	0.086	0.071	0.062	0.084	0.083	0.104	0.0900452	0.0665776	0.0722942	0.0297888	0.0559683	0.0480062	0.0932344	0.219333	0.0421754	0.0356522
4884.81	0.00453	0.00334	0.0037	0.00122	0.00219	0.00156	0.00257	0.00818	0.00157	0.00165	0.111	0.11	0.115	0.092	0.086	0.071	0.062	0.084	0.083	0.104	0.0939873	0.0699275	0.0740965	0.0305398	0.0586462	0.0506011	0.0954631	0.224268	0.0435628	0.036538
4886.73	0.00472	0.00355	0.00376	0.00128	0.00224	0.00161	0.00269	0.00845	0.00161	0.00171	0.111	0.11	0.115	0.092	0.086	0.071	0.062	0.084	0.083	0.104	0.0979294	0.0743241	0.0752981	0.0320417	0.0599851	0.052223	0.0999205	0.231671	0.0446727	0.0378666
4888.66	0.00489	0.00371	0.0039	0.00137	0.00226	0.00166	0.0028	0.00877	0.00167	0.00179	0.111	0.11	0.115	0.092	0.086	0.071	0.062	0.084	0.083	0.104	0.101456	0.0776739	0.0781017	0.0342947	0.0605207	0.0538448	0.104006	0.240444	0.0463375	0.0396382
4890.59	0.00503	0.0038	0.00414	0.00152	0.00229	0.00171	0.00285	0.00909	0.0017	0.0019	0.111	0.11	0.115	0.092	0.086	0.071	0.062	0.084	0.083	0.104	0.104361	0.0795582	0.082908	0.0380496	0.0613241	0.0554666	0.105864	0.249218	0.0471699	0.042074
4892.52	0.00516	0.00389	0.0044	0.00168	0.00237	0.00176	0.00291	0.0094	0.00172	0.00201	0.111	0.11	0.115	0.092	0.086	0.071	0.062	0.084	0.083	0.104	0.107058	0.0814425	0.0881148	0.0420548	0.0634664	0.0570885	0.108092	0.257717	0.0477248	0.0445099
4894.45	0.00533	0.00401	0.00461	0.00177	0.00248	0.00182	0.00299	0.00971	0.00182	0.00207	0.111	0.11	0.115	0.092	0.086	0.071	0.062	0.084	0.083	0.104	0.110585	0.0839548	0.0923203	0.0443077	0.0664121	0.0590346	0.111064	0.266216	0.0504995	0.0458386
4896.38	0.00553	0.00415	0.00477	0.0018	0.00257	0.00191	0.00303	0.01004	0.0019	0.00213	0.111	0.11	0.115	0.092	0.086	0.071	0.062	0.084	0.083	0.104	0.114735	0.0868859	0.0955244	0.0450587	0.0688222	0.0619539	0.11255	0.275263	0.0527193	0.0471672
4898.31	0.00575	0.00426	0.00493	0.00187	0.00265	0.00201	0.00304	0.01037	0.0019	0.00224	0.111	0.11	0.115	0.092	0.086	0.071	0.062	0.084	0.083	0.104	0.1193	0.0891889	0.0987286	0.046811	0.0709645	0.0651976	0.112921	0.284311	0.0527193	0.0496031
4900.23	0.00597	0.00434	0.00514	0.00197	0.00272	0.00207	0.00307	0.01069	0.00189	0.00233	0.111	0.11	0.115	0.092	0.086	0.071	0.062	0.084	0.083	0.104	0.123864	0.0908638	0.102934	0.0493142	0.0728391	0.0671438	0.114036	0.293084	0.0524418	0.0515961
4902.16	0.00619	0.00445	0.00535	0.00202	0.0028	0.00209	0.00316	0.011	0.00191	0.00239	0.111	0.11	0.115	0.092	0.086	0.071	0.062	0.084	0.083	0.104	0.128429	0.0931668	0.10714	0.0505659	0.0749814	0.0677925	0.117379	0.301583	0.0529967	0.0529247
4904.09	0.00641	0.00463	0.00554	0.00206	0.00292	0.00209	0.0033	0.01132	0.00196	0.00245	0.111	0.11	0.115	0.092	0.086	0.071	0.062	0.084	0.083	0.104	0.132993	0.0969354	0.110945	0.0515672	0.0781949	0.0677925	0.122579	0.310357	0.0543841	0.0542534
4906.02	0.00664	0.00485	0.00573	0.00216	0.00303	0.00217	0.00343	0.01166	0.002	0.00258	0.111	0.11	0.115	0.092	0.086	0.071	0.062	0.084	0.083	0.104	0.137765	0.101541	0.114749	0.0540704	0.0811406	0.0703875	0.127408	0.319678	0.055494	0.0571321
4907.95	0.00691	0.00504	0.00591	0.00232	0.00307	0.00233	0.00355	0.01197	0.00201	0.00275	0.111	0.11	0.115	0.092	0.086	0.071	0.062	0.084	0.083	0.104	0.143367	0.105519	0.118354	0.0580757	0.0822117	0.0755773	0.131865	0.328177	0.0557714	0.0608966
4909.88	0.0072	0.00518	0.00616	0.00245	0.00307	0.0025	0.00363	0.01222	0.00201	0.00289	0.111	0.11	0.115	0.092	0.086	0.071	0.062	0.084	0.083	0.104	0.149384	0.10845	0.123361	0.0613299	0.0822117	0.0810915	0.134837	0.335032	0.0557714	0.0639968
4911.81	0.00747	0.00532	0.00646	0.00252	0.00312	0.00254	0.00368	0.01253	0.00205	0.00301	0.111	0.11	0.115	0.092	0.086	0.071	0.062	0.084	0.083	0.104	0.154986	0.111381	0.129369	0.0630822	0.0835507	0.082389	0.136694	0.343531	0.0568813	0.0666541
4913.73	0.00772	0.00548	0.00672	0.00258	0.00323	0.00255	0.00374	0.0129	0.00214	0.00312	0.111	0.11	0.115	0.092	0.086	0.071	0.062	0.084	0.083	0.104	0.160173	0.114731	0.134575	0.0645841	0.0864964	0.0827134	0.138923	0.353675	0.0593786	0.06909
4915.66	0.00797	0.00564	0.00692	0.00264	0.00337	0.00264	0.00381	0.01326	0.00219	0.00321	0.111	0.11	0.115	0.092	0.086	0.071	0.062	0.084	0.083	0.104	0.16536	0.118081	0.138581	0.0660861	0.0902455	0.0856327	0.141523	0.363545	0.0607659	0.071083
4917.59	0.00818	0.00581	0.00713	0.00276	0.00351	0.00282	0.00391	0.01362	0.00222	0.00326	0.111	0.11	0.115	0.092	0.086	0.071	0.062	0.084	0.083	0.104	0.169717	0.12164	0.142786	0.06909	0.0939945	0.0914713	0.145238	0.373415	0.0615983	0.0721902
4919.52	0.0084	0.00603	0.00738	0.00291	0.00362	0.00297	0.00399	0.01399	0.00225	0.00328	0.111	0.11	0.115	0.092	0.086	0.071	0.062	0.084	0.083	0.104	0.174281	0.126246	0.147793	0.0728449	0.0969402	0.0963368	0.148209	0.383559	0.0624307	0.0726331
4921.45	0.0087	0.00624	0.00767	0.00302	0.00371	0.00305	0.00404	0.0143	0.0023	0.00333	0.111	0.11	0.115	0.092	0.086	0.071	0.062	0.084	0.083	0.104	0.180505	0.130643	0.1536	0.0755985	0.0993503	0.0989317	0.150066	0.392058	0.0638181	0.0737403
4923.38	0.00905	0.00643	0.00798	0.0031	0.00379	0.0031	0.0041	0.01462	0.00237	0.00343	0.111	0.11	0.115	0.092	0.086	0.071	0.062	0.084	0.083	0.104	0.187767	0.134621	0.159808	0.0776011	0.101493	0.100554	0.152295	0.400832	0.0657604	0.0759547
4925.3	0.00939	0.00661	0.0083	0.00322	0.00388	0.00316	0.00419	0.015	0.00247	0.00359	0.111	0.11	0.115	0.092	0.086	0.071	0.062	0.084	0.083	0.104	0.194821	0.138389	0.166217	0.080605	0.103903	0.1025	0.155638	0.41125	0.0685351	0.0794978
4927.23	0.00971	0.0068	0.00861	0.00336	0.00396	0.00324	0.0043	0.01541	0.00255	0.00378	0.111	0.11	0.115	0.092	0.086	0.071	0.062	0.084	0.083	0.104	0.201461	0.142367	0.172425	0.0841096	0.106045	0.105095	0.159724	0.422491	0.0707548	0.0837052
4929.16	0.01002	0.00699	0.00893	0.0035	0.00403	0.00336	0.00441	0.01584	0.00264	0.00394	0.111	0.11	0.115	0.092	0.086	0.071	0.062	0.084	0.083	0.104	0.207892	0.146345	0.178833	0.0876141	0.10792	0.108987	0.16381	0.43428	0.073252	0.0872483
4931.09	0.01031	0.00716	0.00922	0.00362	0.00413	0.00349	0.00453	0.01628	0.00274	0.00404	0.111	0.11	0.115	0.092	0.086	0.071	0.062	0.084	0.083	0.104	0.213909	0.149904	0.184641	0.090618	0.110598	0.113204	0.168268	0.446343	0.0760267	0.0894627
4933.02	0.0106	0.00735	0.00952	0.0037	0.00426	0.00365	0.00468	0.0167	0.00279	0.00412	0.111	0.11	0.115	0.092	0.086	0.071	0.062	0.084	0.083	0.104	0.219926	0.153882	0.190648	0.0926207	0.114079	0.118394	0.173839	0.457858	0.0774141	0.0912342
4934.95	0.01087	0.00756	0.00983	0.00378	0.00442	0.00381	0.00482	0.01706	0.0028	0.00425	0.111	0.11	0.115	0.092	0.086	0.071	0.062	0.084	0.083	0.104	0.225528	0.158279	0.196856	0.0946233	0.118363	0.123584	0.17904	0.467728	0.0776916	0.094113
4936.88	0.01111	0.00777	0.01013	0.00388	0.00458	0.00395	0.00488	0.01744	0.00287	0.00441	0.111	0.11	0.115	0.092	0.086	0.071	0.062	0.084	0.083	0.104	0.230507	0.162676	0.202864	0.0971265	0.122648	0.128125	0.181268	0.478147	0.0796339	0.0976561
4938.8	0.01144	0.00798	0.0104	0.004	0.00471	0.00403	0.00495	0.01789	0.00299	0.00455	0.111	0.11	0.115	0.092	0.086	0.071	0.062	0.084	0.083	0.104	0.237354	0.167072	0.208271	0.10013	0.126129	0.13072	0.183869	0.490484	0.0829635	0.100756
4940.73	0.01181	0.00818	0.01072	0.00413	0.0048	0.00408	0.00508	0.0184	0.00305	0.00466	0.111	0.11	0.115	0.092	0.086	0.071	0.062	0.084	0.083	0.104	0.245031	0.171259	0.21468	0.103385	0.12854	0.132341	0.188697	0.504467	0.0846283	0.103192
4942.66	0.01212	0.00838	0.01107	0.00426	0.00486	0.00416	0.00525	0.01891	0.00307	0.00473	0.111	0.11	0.115	0.092	0.086	0.071	0.062	0.084	0.083	0.104	0.251463	0.175447	0.221689	0.106639	0.130146	0.134936	0.195012	0.518449	0.0851833	0.104742
4944.59	0.01238	0.00858	0.0114	0.00441	0.00493	0.0043	0.0054	0.01939	0.00314	0.00478	0.111	0.11	0.115	0.092	0.086	0.071	0.062	0.084	0.083	0.104	0.256857	0.179634	0.228297	0.110394	0.132021	0.139477	0.200584	0.531609	0.0871255	0.105849
4946.52	0.01269	0.00877	0.01168	0.00455	0.00503	0.00446	0.0055	0.01986	0.00322	0.00489	0.111	0.11	0.115	0.092	0.086	0.071	0.062	0.084	0.083	0.104	0.263289	0.183612	0.233905	0.113898	0.134699	0.144667	0.204298	0.544495	0.0893453	0.108285
4948.45	0.01306	0.00897	0.01198	0.00467	0.00515	0.00463	0.00557	0.02032	0.00329	0.00504	0.111	0.11	0.115	0.092	0.086	0.071	0.062	0.084	0.083	0.104	0.270966	0.187799	0.239913	0.116902	0.137912	0.150182	0.206899	0.557107	0.0912876	0.111607
4950.37	0.01343	0.00922	0.0123	0.00477	0.00528	0.00472	0.00568	0.02076	0.00339	0.00519	0.111	0.11	0.115	0.092	0.086	0.071	0.062	0.084	0.083	0.104	0.278642	0.193033	0.246321	0.119406	0.141393	0.153101	0.210985	0.56917	0.0940623	0.114929
4952.3	0.01381	0.0095	0.01262	0.00488	0.00539	0.00476	0.00585	0.0212	0.00347	0.00531	0.111	0.11	0.115	0.092	0.086	0.071	0.062	0.084	0.083	0.104	0.286526	0.198895	0.252729	0.122159	0.144339	0.154398	0.217299	0.581233	0.096282	0.117586
4954.23	0.01422	0.00977	0.01297	0.00504	0.00549	0.00484	0.006	0.02166	0.00348	0.00544	0.111	0.11	0.115	0.092	0.086	0.071	0.062	0.084	0.083	0.104	0.295033	0.204548	0.259738	0.126164	0.147017	0.156993	0.222871	0.593845	0.0965595	0.120465
4956.16	0.01464	0.01004	0.01336	0.00522	0.00564	0.00496	0.00609	0.02213	0.00351	0.00558	0.111	0.11	0.115	0.092	0.086	0.071	0.062	0.084	0.083	0.104	0.303747	0.210201	0.267549	0.13067	0.151034	0.160886	0.226214	0.606731	0.0973919	0.123565
4958.09	0.01502	0.01031	0.01375	0.0054	0.00577	0.00508	0.00617	0.02266	0.0036	0.00572	0.111	0.11	0.115	0.092	0.086	0.071	0.062	0.084	0.083	0.104	0.311631	0.215854	0.275359	0.135176	0.154515	0.164778	0.229186	0.621262	0.0998892	0.126665
4960.02	0.01539	0.01056	0.01412	0.00557	0.00589	0.00521	0.0063	0.02322	0.0037	0.00584	0.111	0.11	0.115	0.092	0.086	0.071	0.062	0.084	0.083	0.104	0.319308	0.221088	0.282768	0.139432	0.157729	0.168995	0.234015	0.636615	0.102664	0.129322
4961.94	0.01574	0.01078	0.0145	0.00575	0.006	0.00535	0.00649	0.02371	0.00377	0.00601	0.111	0.11	0.115	0.092	0.086	0.071	0.062	0.084	0.083	0.104	0.32657	0.225694	0.290378	0.143937	0.160674	0.173536	0.241072	0.650049	0.104606	0.133087
4963.87	0.01609	0.01101	0.01495	0.0059	0.00612	0.0055	0.00667	0.02415	0.00381	0.00621	0.111	0.11	0.115	0.092	0.086	0.071	0.062	0.084	0.083	0.104	0.333831	0.230509	0.29939	0.147692	0.163888	0.178401	0.247758	0.662112	0.105716	0.137516
4965.8	0.01647	0.01128	0.01542	0.00599	0.00624	0.00568	0.00676	0.02464	0.00386	0.00639	0.111	0.11	0.115	0.092	0.086	0.071	0.062	0.084	0.083	0.104	0.341715	0.236162	0.308802	0.149945	0.167101	0.18424	0.251101	0.675547	0.107103	0.141502
4967.73	0.01688	0.01159	0.01581	0.00608	0.00634	0.00585	0.00686	0.02519	0.00396	0.00651	0.111	0.11	0.115	0.092	0.086	0.071	0.062	0.084	0.083	0.104	0.350222	0.242652	0.316612	0.152198	0.169779	0.189754	0.254816	0.690626	0.109878	0.144159
4969.66	0.01729	0.01186	0.01616	0.00622	0.00645	0.00598	0.007	0.02569	0.00409	0.00663	0.111	0.11	0.115	0.092	0.086	0.071	0.062	0.084	0.083	0.104	0.358729	0.248305	0.323622	0.155703	0.172725	0.193971	0.260016	0.704334	0.113485	0.146816
4971.59	0.01771	0.01208	0.01654	0.00639	0.00657	0.00609	0.00715	0.02612	0.00417	0.00673	0.111	0.11	0.115	0.092	0.086	0.071	0.062	0.084	0.083	0.104	0.367443	0.252911	0.331231	0.159958	0.175938	0.197539	0.265588	0.716123	0.115705	0.149031
4973.52	0.01812	0.01235	0.01694	0.0065	0.0067	0.0062	0.00728	0.0265	0.00419	0.00685	0.111	0.11	0.115	0.092	0.086	0.071	0.062	0.084	0.083	0.104	0.375949	0.258564	0.339242	0.162712	0.17942	0.201107	0.270417	0.726542	0.11626	0.151688
4975.44	0.0185	0.01267	0.01731	0.00662	0.00683	0.0063	0.00739	0.0269	0.00426	0.00703	0.111	0.11	0.115	0.092	0.086	0.071	0.062	0.084	0.083	0.104	0.383833	0.265264	0.346652	0.165716	0.182901	0.204351	0.274503	0.737508	0.118202	0.155674
4977.37	0.01885	0.01294	0.01764	0.0068	0.00698	0.00642	0.00748	0.02737	0.00437	0.00728	0.111	0.11	0.115	0.092	0.086	0.071	0.062	0.084	0.083	0.104	0.391095	0.270917	0.35326	0.170222	0.186918	0.208243	0.277846	0.750394	0.121254	0.16121
4979.3	0.01917	0.01313	0.01799	0.00702	0.00712	0.00656	0.00758	0.02787	0.00448	0.0075	0.111	0.11	0.115	0.092	0.086	0.071	0.062	0.084	0.083	0.104	0.397734	0.274894	0.360269	0.175729	0.190667	0.212784	0.28156	0.764102	0.124307	0.166082
4981.23	0.01953	0.01336	0.01837	0.00724	0.00722	0.0067	0.00773	0.02827	0.00456	0.00762	0.111	0.11	0.115	0.092	0.086	0.071	0.062	0.084	0.083	0.104	0.405204	0.27971	0.367879	0.181236	0.193345	0.217325	0.287132	0.775069	0.126526	0.168739
4983.16	0.01993	0.01364	0.01877	0.00739	0.00728	0.0068	0.00786	0.02864	0.0046	0.00771	0.111	0.11	0.115	0.092	0.086	0.071	0.062	0.084	0.083	0.104	0.413503	0.285572	0.37589	0.184991	0.194952	0.220569	0.291961	0.785213	0.127636	0.170732
4985.09	0.02028	0.01392	0.01916	0.00747	0.0074	0.00687	0.00796	0.02907	0.00463	0.00784	0.111	0.11	0.115	0.092	0.086	0.071	0.062	0.084	0.083	0.104	0.420764	0.291434	0.3837	0.186994	0.198165	0.22284	0.295675	0.797002	0.128469	0.173611
4987.02	0.02062	0.0142	0.01949	0.00757	0.00758	0.00702	0.00808	0.0296	0.00467	0.00809	0.111	0.11	0.115	0.092	0.086	0.071	0.062	0.084	0.083	0.104	0.427819	0.297296	0.390308	0.189497	0.202985	0.227705	0.300133	0.811533	0.129578	0.179147
4988.94	0.02104	0.01447	0.01977	0.00775	0.00774	0.00723	0.00826	0.03016	0.00477	0.00838	0.111	0.11	0.115	0.092	0.086	0.071	0.062	0.084	0.083	0.104	0.436533	0.302949	0.395916	0.194003	0.20727	0.234517	0.306819	0.826887	0.132353	0.185569
4990.87	0.02152	0.01473	0.02012	0.00796	0.00786	0.00741	0.00846	0.03073	0.00492	0.00859	0.111	0.11	0.115	0.092	0.086	0.071	0.062	0.084	0.083	0.104	0.446492	0.308393	0.402925	0.19926	0.210483	0.240355	0.314248	0.842514	0.136515	0.190219
4992.8	0.02195	0.01501	0.02058	0.0081	0.00797	0.00751	0.00864	0.03132	0.00505	0.00874	0.111	0.11	0.115	0.092	0.086	0.071	0.062	0.084	0.083	0.104	0.455413	0.314255	0.412137	0.202764	0.213429	0.243599	0.320934	0.85869	0.140122	0.193541
4994.73	0.02236	0.01532	0.02112	0.00819	0.00812	0.00758	0.00877	0.03192	0.00514	0.00889	0.111	0.11	0.115	0.092	0.086	0.071	0.062	0.084	0.083	0.104	0.46392	0.320745	0.422951	0.205017	0.217446	0.24587	0.325763	0.87514	0.14262	0.196862
4996.66	0.02281	0.01563	0.02164	0.0083	0.00827	0.00775	0.00886	0.03249	0.00521	0.00905	0.111	0.11	0.115	0.092	0.086	0.071	0.062	0.084	0.083	0.104	0.473256	0.327235	0.433365	0.207771	0.221463	0.251384	0.329106	0.890767	0.144562	0.200405
4998.59	0.02327	0.01587	0.02208	0.00845	0.0084	0.00795	0.00896	0.03298	0.0053	0.00918	0.111	0.11	0.115	0.092	0.086	0.071	0.062	0.084	0.083	0.104	0.4828	0.33226	0.442176	0.211526	0.224944	0.257871	0.332821	0.904202	0.147059	0.203284
5000.51	0.02369	0.01611	0.02248	0.00866	0.00856	0.00808	0.00909	0.03345	0.00543	0.00931	0.111	0.11	0.115	0.092	0.086	0.071	0.062	0.084	0.083	0.104	0.491514	0.337285	0.450186	0.216782	0.229229	0.262088	0.33765	0.917087	0.150666	0.206163
5002.44	0.02408	0.0164	0.02292	0.00887	0.00875	0.0082	0.00924	0.03401	0.00554	0.00947	0.111	0.11	0.115	0.092	0.086	0.071	0.062	0.084	0.083	0.104	0.499606	0.343356	0.458998	0.222039	0.234317	0.26598	0.343221	0.932441	0.153718	0.209706
5004.37	0.02451	0.01673	0.02339	0.00901	0.00894	0.00837	0.00942	0.0346	0.00561	0.00965	0.111	0.11	0.115	0.092	0.086	0.071	0.062	0.084	0.083	0.104	0.508527	0.350265	0.46841	0.225544	0.239405	0.271495	0.349907	0.948617	0.155661	0.213692
5006.3	0.02495	0.01704	0.02382	0.0091	0.00912	0.00855	0.00963	0.03516	0.00567	0.00985	0.111	0.11	0.115	0.092	0.086	0.071	0.062	0.084	0.083	0.104	0.517656	0.356756	0.477021	0.227797	0.244225	0.277333	0.357708	0.96397	0.157325	0.218121
5008.23	0.02537	0.01732	0.02421	0.00926	0.0093	0.00869	0.00983	0.03573	0.0057	0.01004	0.111	0.11	0.115	0.092	0.086	0.071	0.062	0.084	0.083	0.104	0.52637	0.362618	0.484832	0.231802	0.249045	0.281874	0.365137	0.979597	0.158158	0.222328
5010.16	0.02576	0.01757	0.02461	0.0095	0.00945	0.00882	0.00999	0.03641	0.00577	0.01022	0.111	0.11	0.115	0.092	0.086	0.071	0.062	0.084	0.083	0.104	0.534462	0.367852	0.492842	0.23781	0.253062	0.286091	0.37108	0.998241	0.1601	0.226314
5012.09	0.02617	0.01786	0.02509	0.00972	0.00956	0.00899	0.01013	0.03716	0.00591	0.01041	0.111	0.11	0.115	0.092	0.086	0.071	0.062	0.084	0.083	0.104	0.542969	0.373923	0.502455	0.243317	0.256008	0.291605	0.37628	1.0188	0.163985	0.230521
5014.01	0.02662	0.01821	0.02561	0.00989	0.00965	0.00915	0.01024	0.03785	0.00606	0.01061	0.111	0.11	0.115	0.092	0.086	0.071	0.062	0.084	0.083	0.104	0.552305	0.381251	0.512868	0.247572	0.258418	0.296795	0.380366	1.03772	0.168147	0.23495
5015.94	0.0271	0.01857	0.02607	0.01004	0.00978	0.00933	0.01037	0.03844	0.00619	0.01086	0.111	0.11	0.115	0.092	0.086	0.071	0.062	0.084	0.083	0.104	0.562264	0.388788	0.52208	0.251327	0.261899	0.302634	0.385195	1.0539	0.171754	0.240486
5017.87	0.02755	0.01891	0.02651	0.01018	0.00994	0.00953	0.01053	0.03904	0.0063	0.01116	0.111	0.11	0.115	0.092	0.086	0.071	0.062	0.084	0.083	0.104	0.5716	0.395907	0.530892	0.254832	0.266184	0.309121	0.391139	1.07035	0.174806	0.24713
5019.8	0.02797	0.01926	0.02701	0.01033	0.01011	0.00967	0.01074	0.03969	0.00644	0.01146	0.111	0.11	0.115	0.092	0.086	0.071	0.062	0.084	0.083	0.104	0.580315	0.403234	0.540905	0.258587	0.270736	0.313662	0.398939	1.08817	0.178691	0.253773
5021.73	0.02842	0.01964	0.02756	0.0105	0.01026	0.00979	0.01097	0.04032	0.00657	0.01166	0.111	0.11	0.115	0.092	0.086	0.071	0.062	0.084	0.083	0.104	0.589651	0.41119	0.551919	0.262842	0.274753	0.317555	0.407482	1.10544	0.182298	0.258202
5023.66	0.02888	0.01999	0.02808	0.01073	0.0104	0.00994	0.01119	0.0409	0.00665	0.01183	0.111	0.11	0.115	0.092	0.086	0.071	0.062	0.084	0.083	0.104	0.599195	0.418518	0.562333	0.2686	0.278502	0.32242	0.415654	1.12134	0.184517	0.261966
5025.58	0.02933	0.02031	0.02856	0.01095	0.01055	0.01011	0.01137	0.04152	0.00673	0.01205	0.111	0.11	0.115	0.092	0.086	0.071	0.062	0.084	0.083	0.104	0.608531	0.425218	0.571945	0.274107	0.282519	0.327934	0.42234	1.13834	0.186737	0.266838
5027.51	0.02976	0.02063	0.029	0.01117	0.0107	0.01029	0.01153	0.04214	0.00683	0.01235	0.111	0.11	0.115	0.092	0.086	0.071	0.062	0.084	0.083	0.104	0.617453	0.431917	0.580757	0.279614	0.286536	0.333773	0.428284	1.15534	0.189512	0.273481
5029.44	0.0302	0.02097	0.02944	0.01143	0.01086	0.01049	0.01172	0.04276	0.00692	0.01262	0.111	0.11	0.115	0.092	0.086	0.071	0.062	0.084	0.083	0.104	0.626582	0.439036	0.589568	0.286123	0.290821	0.34026	0.435341	1.17234	0.192009	0.27946
5031.37	0.03068	0.02136	0.02993	0.01163	0.01102	0.01071	0.01192	0.04339	0.00703	0.01283	0.111	0.11	0.115	0.092	0.086	0.071	0.062	0.084	0.083	0.104	0.636541	0.447201	0.599381	0.291129	0.295105	0.347396	0.44277	1.18961	0.195061	0.28411
5033.3	0.03118	0.02177	0.03046	0.01178	0.01116	0.01091	0.01215	0.04401	0.00717	0.01304	0.111	0.11	0.115	0.092	0.086	0.071	0.062	0.084	0.083	0.104	0.646915	0.455785	0.609995	0.294884	0.298854	0.353884	0.451314	1.20661	0.198946	0.288761
5035.23	0.0317	0.02216	0.03099	0.01195	0.01132	0.01106	0.01239	0.04459	0.00729	0.01325	0.111	0.11	0.115	0.092	0.086	0.071	0.062	0.084	0.083	0.104	0.657704	0.46395	0.620608	0.29914	0.303139	0.358749	0.460229	1.22251	0.202276	0.293411
5037.15	0.03221	0.0225	0.03153	0.01217	0.0115	0.01123	0.01257	0.04515	0.00744	0.01348	0.111	0.11	0.115	0.092	0.086	0.071	0.062	0.084	0.083	0.104	0.668285	0.471068	0.631423	0.304647	0.307959	0.364263	0.466915	1.23786	0.206438	0.298504
5039.08	0.03271	0.02281	0.03209	0.01237	0.0117	0.01139	0.0127	0.04576	0.00756	0.01376	0.111	0.11	0.115	0.092	0.086	0.071	0.062	0.084	0.083	0.104	0.678659	0.477558	0.642637	0.309653	0.313315	0.369453	0.471744	1.25459	0.209767	0.304705
5041.01	0.03323	0.02316	0.03263	0.01256	0.01198	0.01155	0.01289	0.04635	0.00762	0.01405	0.111	0.11	0.115	0.092	0.086	0.071	0.062	0.084	0.083	0.104	0.689448	0.484886	0.653451	0.31441	0.320813	0.374643	0.478801	1.27076	0.211432	0.311126
5042.94	0.03377	0.02352	0.03313	0.01276	0.01228	0.01172	0.01312	0.04694	0.00768	0.0143	0.111	0.11	0.115	0.092	0.086	0.071	0.062	0.084	0.083	0.104	0.700651	0.492423	0.663464	0.319416	0.328847	0.380157	0.487345	1.28694	0.213097	0.316662
5044.87	0.03429	0.02387	0.03359	0.01297	0.01251	0.01191	0.01333	0.04752	0.0078	0.01452	0.111	0.11	0.115	0.092	0.086	0.071	0.062	0.084	0.083	0.104	0.71144	0.499751	0.672676	0.324673	0.335006	0.38632	0.495145	1.30284	0.216427	0.321534
5046.8	0.03474	0.02424	0.03408	0.01318	0.01261	0.01213	0.01351	0.04809	0.00797	0.01478	0.111	0.11	0.115	0.092	0.086	0.071	0.062	0.084	0.083	0.104	0.720777	0.507497	0.682489	0.32993	0.337684	0.393456	0.501831	1.31847	0.221143	0.327292
5048.73	0.03519	0.02462	0.03462	0.01337	0.01272	0.01239	0.0137	0.04865	0.00813	0.01506	0.111	0.11	0.115	0.092	0.086	0.071	0.062	0.084	0.083	0.104	0.730113	0.515453	0.693303	0.334686	0.34063	0.40189	0.508889	1.33382	0.225583	0.333492
5050.65	0.03567	0.02499	0.03518	0.01361	0.01286	0.01265	0.01389	0.04921	0.00826	0.0153	0.111	0.11	0.115	0.092	0.086	0.071	0.062	0.084	0.083	0.104	0.740072	0.5232	0.704518	0.340694	0.344379	0.410323	0.515946	1.34917	0.22919	0.338807
5052.58	0.03615	0.02535	0.03575	0.01385	0.01303	0.01288	0.01406	0.04979	0.00833	0.01554	0.111	0.11	0.115	0.092	0.086	0.071	0.062	0.084	0.083	0.104	0.750031	0.530737	0.715933	0.346702	0.348931	0.417784	0.522261	1.36508	0.231132	0.344121
5054.51	0.03664	0.02576	0.03628	0.01409	0.01317	0.01302	0.01422	0.0504	0.00837	0.0158	0.111	0.11	0.115	0.092	0.086	0.071	0.062	0.084	0.083	0.104	0.760197	0.539321	0.726546	0.352709	0.35268	0.422325	0.528204	1.3818	0.232242	0.349879
5056.44	0.03719	0.02621	0.03679	0.01429	0.01331	0.01314	0.01442	0.05101	0.00844	0.01608	0.111	0.11	0.115	0.092	0.086	0.071	0.062	0.084	0.083	0.104	0.771609	0.548742	0.73676	0.357716	0.356429	0.426217	0.535633	1.39852	0.234185	0.356079
5058.37	0.03775	0.0266	0.03731	0.01442	0.01352	0.0133	0.01465	0.05158	0.00858	0.01634	0.111	0.11	0.115	0.092	0.086	0.071	0.062	0.084	0.083	0.104	0.783227	0.556907	0.747173	0.36097	0.362053	0.431407	0.544177	1.41415	0.238069	0.361837
5060.3	0.03822	0.02698	0.03783	0.01455	0.01378	0.01353	0.0149	0.05213	0.00876	0.01657	0.111	0.11	0.115	0.092	0.086	0.071	0.062	0.084	0.083	0.104	0.792979	0.564863	0.757587	0.364224	0.369016	0.438867	0.553463	1.42923	0.243064	0.36693
5062.23	0.03865	0.02738	0.03839	0.01474	0.01401	0.01378	0.01514	0.05264	0.00892	0.01681	0.111	0.11	0.115	0.092	0.086	0.071	0.062	0.084	0.083	0.104	0.8019	0.573238	0.768801	0.368981	0.375175	0.446977	0.562378	1.44321	0.247503	0.372245
5064.15	0.03913	0.0278	0.039	0.01499	0.01421	0.01402	0.01537	0.05306	0.00909	0.01706	0.111	0.11	0.115	0.092	0.086	0.071	0.062	0.084	0.083	0.104	0.811859	0.582031	0.781017	0.375239	0.380531	0.454761	0.570921	1.45473	0.25222	0.377781
5066.08	0.03966	0.02822	0.03959	0.01525	0.0144	0.01427	0.01562	0.05346	0.00926	0.01733	0.111	0.11	0.115	0.092	0.086	0.071	0.062	0.084	0.083	0.104	0.822856	0.590824	0.792833	0.381747	0.385619	0.462871	0.580207	1.46569	0.256937	0.38376
5068.01	0.04015	0.02858	0.04012	0.01548	0.01453	0.01452	0.01585	0.05395	0.00943	0.01762	0.111	0.11	0.115	0.092	0.086	0.071	0.062	0.084	0.083	0.104	0.833022	0.598361	0.803447	0.387505	0.3891	0.47098	0.588751	1.47913	0.261654	0.390181
5069.94	0.04058	0.0289	0.04064	0.01564	0.01461	0.01477	0.01604	0.05445	0.00955	0.01786	0.111	0.11	0.115	0.092	0.086	0.071	0.062	0.084	0.083	0.104	0.841944	0.605061	0.81386	0.39151	0.391242	0.479089	0.595808	1.49284	0.264984	0.395496
5071.87	0.04105	0.0292	0.04121	0.01583	0.01478	0.01493	0.01623	0.05487	0.00963	0.01811	0.111	0.11	0.115	0.092	0.086	0.071	0.062	0.084	0.083	0.104	0.851695	0.611342	0.825275	0.396266	0.395795	0.484279	0.602866	1.50435	0.267203	0.401032
5073.8	0.04156	0.02958	0.0418	0.01608	0.01508	0.01505	0.01645	0.05527	0.00971	0.01842	0.111	0.11	0.115	0.092	0.086	0.071	0.062	0.084	0.083	0.104	0.862276	0.619298	0.83709	0.402524	0.403828	0.488171	0.611038	1.51532	0.269423	0.407897
5075.73	0.04206	0.03003	0.04233	0.0163	0.01539	0.01523	0.01663	0.05569	0.00979	0.01869	0.111	0.11	0.115	0.092	0.086	0.071	0.062	0.084	0.083	0.104	0.87265	0.628719	0.847704	0.408032	0.41213	0.49401	0.617724	1.52683	0.271643	0.413876
5077.65	0.04252	0.03049	0.04282	0.01648	0.0156	0.0155	0.01679	0.05611	0.0099	0.01895	0.111	0.11	0.115	0.092	0.086	0.071	0.062	0.084	0.083	0.104	0.882194	0.63835	0.857517	0.412537	0.417753	0.502768	0.623667	1.53835	0.274695	0.419633
5079.58	0.04299	0.03098	0.04336	0.01667	0.01572	0.01577	0.01698	0.05651	0.01004	0.01925	0.111	0.11	0.115	0.092	0.086	0.071	0.062	0.084	0.083	0.104	0.891946	0.648609	0.868331	0.417294	0.420967	0.511525	0.630725	1.54932	0.27858	0.426276
5081.51	0.0435	0.03147	0.04395	0.01683	0.01579	0.01596	0.01719	0.05689	0.01019	0.01958	0.111	0.11	0.115	0.092	0.086	0.071	0.062	0.084	0.083	0.104	0.902527	0.658867	0.880147	0.421299	0.422842	0.517688	0.638525	1.55973	0.282742	0.433584
5083.44	0.04398	0.03188	0.04452	0.01703	0.01592	0.01612	0.0174	0.05727	0.01032	0.01989	0.111	0.11	0.115	0.092	0.086	0.071	0.062	0.084	0.083	0.104	0.912486	0.667451	0.891561	0.426305	0.426323	0.522878	0.646326	1.57015	0.286349	0.440449
5085.37	0.04446	0.03219	0.04504	0.01728	0.01614	0.01632	0.01757	0.05768	0.01044	0.02017	0.111	0.11	0.115	0.092	0.086	0.071	0.062	0.084	0.083	0.104	0.922445	0.673942	0.901975	0.432563	0.432214	0.529366	0.65264	1.58139	0.289679	0.446649
5087.3	0.04496	0.03251	0.04557	0.01754	0.01637	0.01652	0.01773	0.05817	0.01058	0.0204	0.111	0.11	0.115	0.092	0.086	0.071	0.062	0.084	0.083	0.104	0.932819	0.680641	0.912589	0.439072	0.438373	0.535853	0.658584	1.59483	0.293563	0.451742
5089.22	0.04544	0.03289	0.04612	0.01777	0.01652	0.01668	0.01794	0.05867	0.01073	0.02066	0.111	0.11	0.115	0.092	0.086	0.071	0.062	0.084	0.083	0.104	0.942778	0.688597	0.923603	0.444829	0.44239	0.541043	0.666384	1.60854	0.297725	0.4575
5091.15	0.04593	0.0333	0.04667	0.01794	0.01664	0.01689	0.01824	0.05904	0.01085	0.021	0.111	0.11	0.115	0.092	0.086	0.071	0.062	0.084	0.083	0.104	0.952944	0.697181	0.934617	0.449085	0.445604	0.547855	0.677528	1.61868	0.301055	0.465029
5093.08	0.04646	0.03372	0.04724	0.01813	0.01679	0.01711	0.01854	0.05937	0.01097	0.02135	0.111	0.11	0.115	0.092	0.086	0.071	0.062	0.084	0.083	0.104	0.96394	0.705974	0.946032	0.453841	0.449621	0.554991	0.688671	1.62773	0.304384	0.472779
5095.01	0.04699	0.03412	0.04779	0.01836	0.01698	0.0173	0.01877	0.05973	0.01113	0.02164	0.111	0.11	0.115	0.092	0.086	0.071	0.062	0.084	0.083	0.104	0.974937	0.714349	0.957047	0.459599	0.454709	0.561154	0.697215	1.6376	0.308824	0.479201
5096.94	0.04744	0.03451	0.04832	0.01859	0.01719	0.01752	0.01893	0.06011	0.01127	0.02185	0.111	0.11	0.115	0.092	0.086	0.071	0.062	0.084	0.083	0.104	0.984273	0.722514	0.967661	0.465356	0.460332	0.56829	0.703158	1.64802	0.312709	0.483851
5098.87	0.04785	0.0349	0.04887	0.01876	0.0174	0.01776	0.01909	0.06046	0.01136	0.02207	0.111	0.11	0.115	0.092	0.086	0.071	0.062	0.084	0.083	0.104	0.99278	0.730679	0.978675	0.469612	0.465956	0.576074	0.709101	1.65761	0.315206	0.488723
5100.79	0.04829	0.03533	0.04945	0.01894	0.01756	0.01797	0.0193	0.06078	0.01146	0.02232	0.111	0.11	0.115	0.092	0.086	0.071	0.062	0.084	0.083	0.104	1.00191	0.739682	0.99029	0.474118	0.47024	0.582886	0.716902	1.66639	0.31798	0.494259
5102.72	0.04881	0.03574	0.05002	0.01918	0.01767	0.01813	0.01955	0.06115	0.01159	0.02254	0.111	0.11	0.115	0.092	0.086	0.071	0.062	0.084	0.083	0.104	1.0127	0.748266	1.0017	0.480125	0.473186	0.588076	0.726188	1.67653	0.321588	0.499131
5104.65	0.04935	0.03609	0.0506	0.01936	0.01786	0.01829	0.01979	0.06158	0.01174	0.02274	0.111	0.11	0.115	0.092	0.086	0.071	0.062	0.084	0.083	0.104	1.0239	0.755593	1.01332	0.484631	0.478274	0.593266	0.735103	1.68832	0.32575	0.50356
5106.58	0.04986	0.03645	0.05118	0.01947	0.01812	0.01852	0.02003	0.06197	0.01185	0.02302	0.111	0.11	0.115	0.092	0.086	0.071	0.062	0.084	0.083	0.104	1.03448	0.76313	1.02494	0.487385	0.485237	0.600726	0.744018	1.69901	0.328802	0.50976
5108.51	0.05034	0.03681	0.05177	0.01959	0.01832	0.01877	0.02025	0.06229	0.01191	0.02337	0.111	0.11	0.115	0.092	0.086	0.071	0.062	0.084	0.083	0.104	1.04444	0.770668	1.03675	0.490389	0.490593	0.608835	0.75219	1.70778	0.330467	0.517511
5110.44	0.05076	0.03712	0.05231	0.0198	0.01845	0.01897	0.02045	0.06262	0.01197	0.02369	0.111	0.11	0.115	0.092	0.086	0.071	0.062	0.084	0.083	0.104	1.05316	0.777158	1.04756	0.495646	0.494074	0.615323	0.759619	1.71683	0.332131	0.524597
5112.36	0.05115	0.0374	0.0528	0.02004	0.01855	0.01912	0.02062	0.06305	0.01209	0.02391	0.111	0.11	0.115	0.092	0.086	0.071	0.062	0.084	0.083	0.104	1.06125	0.78302	1.05738	0.501653	0.496752	0.620188	0.765933	1.72862	0.335461	0.529469
5114.29	0.05157	0.03775	0.05329	0.02023	0.01876	0.01926	0.02079	0.06353	0.01223	0.02411	0.111	0.11	0.115	0.092	0.086	0.071	0.062	0.084	0.083	0.104	1.06996	0.790348	1.06719	0.50641	0.502375	0.624729	0.772248	1.74178	0.339346	0.533897
5116.22	0.05204	0.03815	0.05381	0.02044	0.01903	0.01942	0.02097	0.06399	0.01236	0.02436	0.111	0.11	0.115	0.092	0.086	0.071	0.062	0.084	0.083	0.104	1.07971	0.798722	1.0776	0.511667	0.509606	0.629919	0.778934	1.75439	0.342953	0.539433
5118.15	0.05257	0.03853	0.05432	0.02073	0.01923	0.01961	0.02113	0.06441	0.01246	0.02464	0.111	0.11	0.115	0.092	0.086	0.071	0.062	0.084	0.083	0.104	1.09071	0.806678	1.08782	0.518926	0.514962	0.636082	0.784877	1.76591	0.345727	0.545634
5120.08	0.05307	0.03892	0.05483	0.02099	0.01935	0.0198	0.0213	0.06483	0.01257	0.02493	0.111	0.11	0.115	0.092	0.086	0.071	0.062	0.084	0.083	0.104	1.10108	0.814843	1.09803	0.525434	0.518175	0.642245	0.791192	1.77742	0.34878	0.552056
5122.01	0.05355	0.03933	0.05535	0.02116	0.01948	0.01996	0.02154	0.06531	0.01269	0.02524	0.111	0.11	0.115	0.092	0.086	0.071	0.062	0.084	0.083	0.104	1.11104	0.823427	1.10844	0.52969	0.521656	0.647435	0.800107	1.79058	0.352109	0.55892
5123.94	0.05408	0.03976	0.0559	0.02127	0.01964	0.02013	0.02182	0.06584	0.01282	0.02554	0.111	0.11	0.115	0.092	0.086	0.071	0.062	0.084	0.083	0.104	1.12204	0.83243	1.11946	0.532444	0.525941	0.652949	0.810507	1.80511	0.355716	0.565564
5125.86	0.0546	0.04018	0.05646	0.02141	0.01982	0.02032	0.02207	0.06636	0.01298	0.02581	0.111	0.11	0.115	0.092	0.086	0.071	0.062	0.084	0.083	0.104	1.13283	0.841223	1.13067	0.535948	0.530761	0.659112	0.819794	1.81937	0.360156	0.571543
5127.79	0.05504	0.04059	0.05699	0.02159	0.02	0.02052	0.02226	0.06686	0.0131	0.02603	0.111	0.11	0.115	0.092	0.086	0.071	0.062	0.084	0.083	0.104	1.14196	0.849807	1.14129	0.540454	0.535581	0.665599	0.826851	1.83308	0.363486	0.576414
5129.72	0.05544	0.04102	0.0575	0.02183	0.02016	0.02076	0.02242	0.06749	0.0132	0.02623	0.111	0.11	0.115	0.092	0.086	0.071	0.062	0.084	0.083	0.104	1.15026	0.85881	1.1515	0.546462	0.539866	0.673384	0.832795	1.85035	0.36626	0.580843
5131.65	0.05592	0.04143	0.05801	0.02211	0.02029	0.02103	0.0226	0.06822	0.01332	0.02644	0.111	0.11	0.115	0.092	0.086	0.071	0.062	0.084	0.083	0.104	1.16021	0.867394	1.16171	0.553471	0.543347	0.682142	0.839481	1.87037	0.36959	0.585493
5133.58	0.05645	0.04174	0.05857	0.0224	0.02045	0.02125	0.02278	0.06894	0.01348	0.02672	0.111	0.11	0.115	0.092	0.086	0.071	0.062	0.084	0.083	0.104	1.17121	0.873884	1.17293	0.56073	0.547632	0.689278	0.846167	1.8901	0.374029	0.591694
5135.51	0.05694	0.042	0.05913	0.02263	0.0207	0.02143	0.02295	0.06962	0.01361	0.02706	0.111	0.11	0.115	0.092	0.086	0.071	0.062	0.084	0.083	0.104	1.18138	0.879327	1.18414	0.566488	0.554327	0.695117	0.852481	1.90875	0.377637	0.599223
5137.44	0.05738	0.04232	0.05964	0.02276	0.02092	0.02158	0.02311	0.07029	0.01364	0.02738	0.111	0.11	0.115	0.092	0.086	0.071	0.062	0.084	0.083	0.104	1.19051	0.886027	1.19436	0.569742	0.560218	0.699982	0.858425	1.92712	0.378469	0.606309
5139.36	0.0579	0.0427	0.06014	0.02288	0.02108	0.02174	0.02333	0.07099	0.01362	0.0276	0.111	0.11	0.115	0.092	0.086	0.071	0.062	0.084	0.083	0.104	1.20129	0.893983	1.20437	0.572746	0.564503	0.705172	0.866597	1.94631	0.377914	0.611181
5141.29	0.0585	0.04306	0.06069	0.02305	0.02122	0.02198	0.0236	0.07175	0.01369	0.02773	0.111	0.11	0.115	0.092	0.086	0.071	0.062	0.084	0.083	0.104	1.21374	0.90152	1.21538	0.577002	0.568252	0.712957	0.876626	1.96715	0.379856	0.61406
5143.22	0.05905	0.04343	0.06126	0.02326	0.02143	0.02226	0.02384	0.07265	0.01388	0.02789	0.111	0.11	0.115	0.092	0.086	0.071	0.062	0.084	0.083	0.104	1.22515	0.909266	1.2268	0.582258	0.573875	0.722039	0.885541	1.99182	0.385128	0.617603
5145.15	0.05957	0.04386	0.06186	0.02347	0.02165	0.02245	0.02397	0.07369	0.01413	0.02815	0.111	0.11	0.115	0.092	0.086	0.071	0.062	0.084	0.083	0.104	1.23594	0.918269	1.23881	0.587515	0.579767	0.728202	0.89037	2.02033	0.392065	0.62336
5147.08	0.06011	0.04426	0.06251	0.02367	0.02181	0.02253	0.02407	0.0748	0.01429	0.0285	0.111	0.11	0.115	0.092	0.086	0.071	0.062	0.084	0.083	0.104	1.24715	0.926643	1.25183	0.592522	0.584052	0.730797	0.894084	2.05077	0.396504	0.631111
5149.01	0.06069	0.04464	0.06315	0.02389	0.02195	0.02266	0.02425	0.076	0.01439	0.02889	0.111	0.11	0.115	0.092	0.086	0.071	0.062	0.084	0.083	0.104	1.25918	0.934599	1.26465	0.598029	0.587801	0.735014	0.90077	2.08367	0.399279	0.639747
5150.94	0.06125	0.04502	0.06374	0.02412	0.02211	0.02285	0.02449	0.07731	0.01447	0.02922	0.111	0.11	0.115	0.092	0.086	0.071	0.062	0.084	0.083	0.104	1.2708	0.942555	1.27646	0.603787	0.592085	0.741177	0.909685	2.11958	0.401499	0.647054
5152.86	0.06178	0.04541	0.06435	0.02437	0.02227	0.02298	0.02466	0.07873	0.01455	0.02948	0.111	0.11	0.115	0.092	0.086	0.071	0.062	0.084	0.083	0.104	1.2818	0.95072	1.28868	0.610045	0.59637	0.745394	0.916	2.15851	0.403719	0.652812
5154.79	0.06236	0.04582	0.06499	0.02464	0.02244	0.02315	0.02479	0.08017	0.01463	0.0297	0.111	0.11	0.115	0.092	0.086	0.071	0.062	0.084	0.083	0.104	1.29383	0.959304	1.3015	0.616803	0.600922	0.750908	0.920829	2.19799	0.405938	0.657684
5156.72	0.06298	0.04622	0.06561	0.0249	0.02265	0.02347	0.025	0.08162	0.01478	0.02988	0.111	0.11	0.115	0.092	0.086	0.071	0.062	0.084	0.083	0.104	1.30669	0.967679	1.31391	0.623312	0.606546	0.761287	0.928629	2.23775	0.4101	0.66167
5158.65	0.06356	0.04659	0.06618	0.02513	0.02283	0.02383	0.02527	0.08318	0.0149	0.03003	0.111	0.11	0.115	0.092	0.086	0.071	0.062	0.084	0.083	0.104	1.31873	0.975425	1.32533	0.629069	0.611366	0.772965	0.938658	2.28052	0.41343	0.664991
5160.58	0.06417	0.04691	0.06674	0.02534	0.02303	0.02412	0.02555	0.08494	0.01497	0.03028	0.111	0.11	0.115	0.092	0.086	0.071	0.062	0.084	0.083	0.104	1.33138	0.982125	1.33654	0.634326	0.616722	0.782371	0.949059	2.32877	0.415372	0.670527
5162.51	0.06496	0.04725	0.06741	0.02558	0.02334	0.02437	0.02584	0.08696	0.01513	0.03064	0.111	0.11	0.115	0.092	0.086	0.071	0.062	0.084	0.083	0.104	1.34777	0.989243	1.34996	0.640334	0.625023	0.79048	0.959831	2.38415	0.419812	0.678499
5164.43	0.06578	0.04767	0.06818	0.02582	0.02369	0.02463	0.02606	0.08915	0.01538	0.03099	0.111	0.11	0.115	0.092	0.086	0.071	0.062	0.084	0.083	0.104	1.36479	0.998036	1.36538	0.646342	0.634396	0.798914	0.968003	2.4442	0.426749	0.68625
5166.36	0.06644	0.04816	0.06888	0.02607	0.02395	0.02485	0.02623	0.09141	0.01554	0.03121	0.111	0.11	0.115	0.092	0.086	0.071	0.062	0.084	0.083	0.104	1.37848	1.0083	1.3794	0.6526	0.641359	0.80605	0.974318	2.50616	0.431188	0.691121
5168.29	0.06713	0.04866	0.0695	0.02633	0.02414	0.02504	0.02638	0.09383	0.0156	0.03139	0.111	0.11	0.115	0.092	0.086	0.071	0.062	0.084	0.083	0.104	1.3928	1.01876	1.39181	0.659109	0.646447	0.812213	0.979889	2.57251	0.432853	0.695107
5170.22	0.06799	0.04914	0.07018	0.02666	0.02435	0.02526	0.02655	0.09655	0.01571	0.03166	0.111	0.11	0.115	0.092	0.086	0.071	0.062	0.084	0.083	0.104	1.41064	1.02881	1.40543	0.667369	0.65207	0.819349	0.986204	2.64708	0.435905	0.701086
5172.15	0.06886	0.04962	0.07096	0.02701	0.02461	0.02553	0.02673	0.0995	0.01587	0.03199	0.111	0.11	0.115	0.092	0.086	0.071	0.062	0.084	0.083	0.104	1.42869	1.03886	1.42105	0.676131	0.659033	0.828107	0.99289	2.72796	0.440345	0.708394
5174.08	0.06966	0.05011	0.07181	0.02733	0.0248	0.02582	0.02692	0.1026	0.01601	0.03227	0.111	0.11	0.115	0.092	0.086	0.071	0.062	0.084	0.083	0.104	1.44529	1.04912	1.43807	0.684141	0.664121	0.837514	0.999948	2.81295	0.444229	0.714594
5176.01	0.07052	0.05063	0.07269	0.02757	0.02498	0.02614	0.02712	0.10594	0.01616	0.03252	0.111	0.11	0.115	0.092	0.086	0.071	0.062	0.084	0.083	0.104	1.46313	1.06001	1.4557	0.690149	0.668941	0.847893	1.00738	2.90452	0.448391	0.72013
5177.93	0.07149	0.05115	0.07357	0.02782	0.02528	0.02646	0.02736	0.10949	0.01632	0.03279	0.111	0.11	0.115	0.092	0.086	0.071	0.062	0.084	0.083	0.104	1.48326	1.07089	1.47332	0.696407	0.676975	0.858273	1.01629	3.00185	0.452831	0.726109
5179.86	0.07238	0.05164	0.07437	0.02808	0.02559	0.02673	0.02763	0.11331	0.01645	0.03308	0.111	0.11	0.115	0.092	0.086	0.071	0.062	0.084	0.083	0.104	1.50172	1.08115	1.48934	0.702916	0.685276	0.867031	1.02632	3.10658	0.456438	0.732531
5181.79	0.07322	0.05217	0.07513	0.02831	0.02581	0.02699	0.02788	0.11742	0.01649	0.0334	0.111	0.11	0.115	0.092	0.086	0.071	0.062	0.084	0.083	0.104	1.51915	1.09225	1.50456	0.708673	0.691168	0.875464	1.03561	3.21926	0.457548	0.739617
5183.72	0.07429	0.05275	0.07605	0.02867	0.0261	0.02731	0.02808	0.12186	0.01657	0.03368	0.111	0.11	0.115	0.092	0.086	0.071	0.062	0.084	0.083	0.104	1.54135	1.10439	1.52298	0.717685	0.698934	0.885844	1.04304	3.34099	0.459768	0.745818
5185.65	0.07556	0.05333	0.0771	0.02924	0.02648	0.02771	0.02825	0.12649	0.01682	0.0339	0.111	0.11	0.115	0.092	0.086	0.071	0.062	0.084	0.083	0.104	1.5677	1.11654	1.54401	0.731953	0.70911	0.898819	1.04935	3.46793	0.466704	0.750689
5187.58	0.07683	0.05394	0.07818	0.02986	0.02684	0.02806	0.02847	0.13118	0.01713	0.03417	0.111	0.11	0.115	0.092	0.086	0.071	0.062	0.084	0.083	0.104	1.59405	1.12931	1.56564	0.747474	0.71875	0.910172	1.05752	3.59652	0.475306	0.756668
5189.5	0.07808	0.0546	0.07927	0.03038	0.02717	0.02838	0.02876	0.13596	0.01745	0.03449	0.111	0.11	0.115	0.092	0.086	0.071	0.062	0.084	0.083	0.104	1.61998	1.14313	1.58747	0.760491	0.727587	0.920551	1.06829	3.72757	0.484185	0.763755
5191.43	0.07922	0.05524	0.08029	0.03073	0.02748	0.02867	0.029	0.1407	0.01765	0.0348	0.111	0.11	0.115	0.092	0.086	0.071	0.062	0.084	0.083	0.104	1.64364	1.15652	1.60789	0.769252	0.735889	0.929958	1.07721	3.85752	0.489734	0.770619
5193.36	0.08031	0.05583	0.08121	0.03095	0.02774	0.02895	0.02918	0.1453	0.01766	0.03514	0.111	0.11	0.115	0.092	0.086	0.071	0.062	0.084	0.083	0.104	1.66625	1.16888	1.62632	0.774759	0.742851	0.93904	1.0839	3.98364	0.490012	0.778148
5195.29	0.08165	0.05651	0.08229	0.03127	0.02809	0.02931	0.02935	0.15005	0.01775	0.03551	0.111	0.11	0.115	0.092	0.086	0.071	0.062	0.084	0.083	0.104	1.69405	1.18311	1.64795	0.78277	0.752224	0.950717	1.09021	4.11387	0.492509	0.786342
5197.22	0.08328	0.05729	0.08358	0.03179	0.02858	0.02977	0.02958	0.15484	0.01806	0.03589	0.111	0.11	0.115	0.092	0.086	0.071	0.062	0.084	0.083	0.104	1.72787	1.19944	1.67378	0.795787	0.765346	0.965638	1.09875	4.2452	0.501111	0.794756
5199.15	0.08483	0.05804	0.08482	0.03233	0.029	0.03021	0.02986	0.15913	0.01837	0.03626	0.111	0.11	0.115	0.092	0.086	0.071	0.062	0.084	0.083	0.104	1.76003	1.21515	1.69861	0.809304	0.776593	0.97991	1.10915	4.36281	0.509712	0.80295
5201.07	0.08601	0.05876	0.08583	0.03275	0.02925	0.03049	0.03009	0.16279	0.01841	0.03662	0.111	0.11	0.115	0.092	0.086	0.071	0.062	0.084	0.083	0.104	1.78451	1.23022	1.71884	0.819818	0.783288	0.988993	1.1177	4.46316	0.510822	0.810922
5203	0.08708	0.0594	0.0868	0.03311	0.02943	0.03073	0.03021	0.16614	0.01821	0.0369	0.111	0.11	0.115	0.092	0.086	0.071	0.062	0.084	0.083	0.104	1.80671	1.24362	1.73826	0.82883	0.788108	0.996777	1.12216	4.555	0.505273	0.817122
5204.93	0.08866	0.05998	0.088	0.03371	0.02983	0.03117	0.03035	0.16935	0.01822	0.03708	0.111	0.11	0.115	0.092	0.086	0.071	0.062	0.084	0.083	0.104	1.8395	1.25576	1.7623	0.843849	0.79882	1.01105	1.12736	4.64301	0.50555	0.821108
5206.86	0.09092	0.06065	0.0895	0.03455	0.03055	0.03183	0.03064	0.17213	0.01878	0.03734	0.111	0.11	0.115	0.092	0.086	0.071	0.062	0.084	0.083	0.104	1.88639	1.26979	1.79233	0.864877	0.818101	1.03246	1.13813	4.71923	0.521088	0.826866
5208.79	0.09302	0.06148	0.09102	0.03521	0.03126	0.03233	0.03105	0.17396	0.01944	0.03778	0.111	0.11	0.115	0.092	0.086	0.071	0.062	0.084	0.083	0.104	1.92996	1.28717	1.82277	0.881398	0.837114	1.04868	1.15336	4.7694	0.539401	0.836609
5210.72	0.09456	0.06239	0.09238	0.03561	0.0317	0.03261	0.03144	0.17492	0.0198	0.03825	0.111	0.11	0.115	0.092	0.086	0.071	0.062	0.084	0.083	0.104	1.96191	1.30622	1.85001	0.891411	0.848897	1.05776	1.16784	4.79572	0.54939	0.847017
5212.65	0.09588	0.0633	0.09362	0.03596	0.03199	0.03291	0.03177	0.1755	0.0199	0.0386	0.111	0.11	0.115	0.092	0.086	0.071	0.062	0.084	0.083	0.104	1.98929	1.32527	1.87484	0.900173	0.856662	1.06749	1.1801	4.81162	0.552165	0.854767
5214.57	0.09737	0.06412	0.09483	0.0364	0.03227	0.0333	0.03201	0.1759	0.01999	0.03887	0.111	0.11	0.115	0.092	0.086	0.071	0.062	0.084	0.083	0.104	2.02021	1.34244	1.89907	0.911187	0.864161	1.08014	1.18902	4.82259	0.554662	0.860746
5216.5	0.09918	0.06483	0.09613	0.03695	0.03266	0.03375	0.03219	0.17604	0.02018	0.03915	0.111	0.11	0.115	0.092	0.086	0.071	0.062	0.084	0.083	0.104	2.05776	1.3573	1.92511	0.924955	0.874604	1.09474	1.1957	4.82643	0.559934	0.866947
5218.43	0.1011	0.06552	0.09758	0.03757	0.03318	0.03424	0.03235	0.17582	0.02047	0.03945	0.111	0.11	0.115	0.092	0.086	0.071	0.062	0.084	0.083	0.104	2.0976	1.37175	1.95415	0.940475	0.88853	1.11063	1.20165	4.8204	0.567981	0.87359
5220.36	0.10263	0.06622	0.099	0.03806	0.03363	0.03462	0.03251	0.17531	0.02062	0.03976	0.111	0.11	0.115	0.092	0.086	0.071	0.062	0.084	0.083	0.104	2.12934	1.38641	1.98258	0.952741	0.90058	1.12296	1.20759	4.80642	0.572143	0.880455
5222.29	0.10394	0.06681	0.10026	0.03846	0.03395	0.03486	0.03269	0.17477	0.02059	0.04004	0.111	0.11	0.115	0.092	0.086	0.071	0.062	0.084	0.083	0.104	2.15652	1.39876	2.00782	0.962754	0.909149	1.13074	1.21428	4.79161	0.57131	0.886655
5224.22	0.10575	0.06731	0.10152	0.03904	0.03442	0.03521	0.03287	0.17432	0.02071	0.04026	0.111	0.11	0.115	0.092	0.086	0.071	0.062	0.084	0.083	0.104	2.19407	1.40923	2.03305	0.977273	0.921736	1.14209	1.22096	4.77927	0.57464	0.891527
5226.15	0.10779	0.06789	0.10282	0.03973	0.03495	0.03568	0.03304	0.17378	0.02108	0.04046	0.111	0.11	0.115	0.092	0.086	0.071	0.062	0.084	0.083	0.104	2.2364	1.42137	2.05908	0.994546	0.935928	1.15734	1.22728	4.76447	0.584907	0.895956
5228.07	0.10929	0.06855	0.10387	0.04023	0.03529	0.03599	0.03319	0.1732	0.02132	0.04064	0.111	0.11	0.115	0.092	0.086	0.071	0.062	0.084	0.083	0.104	2.26752	1.43519	2.08011	1.00706	0.945033	1.16739	1.23285	4.74857	0.591566	0.899942
5230	0.11055	0.06914	0.10476	0.04057	0.03557	0.03615	0.03328	0.17286	0.02142	0.04072	0.111	0.11	0.115	0.092	0.086	0.071	0.062	0.084	0.083	0.104	2.29366	1.44754	2.09793	1.01557	0.952532	1.17258	1.23619	4.73925	0.59434	0.901713
5231.93	0.11191	0.06962	0.10565	0.0409	0.03593	0.03636	0.03337	0.17265	0.02159	0.04075	0.111	0.11	0.115	0.092	0.086	0.071	0.062	0.084	0.083	0.104	2.32188	1.45759	2.11576	1.02383	0.962172	1.1794	1.23953	4.73349	0.599057	0.902377
5233.86	0.11302	0.06997	0.10638	0.04115	0.0362	0.03652	0.03347	0.17239	0.02182	0.04083	0.111	0.11	0.115	0.092	0.086	0.071	0.062	0.084	0.083	0.104	2.34491	1.46492	2.13038	1.03009	0.969402	1.18459	1.24325	4.72636	0.605439	0.904149
5235.79	0.11376	0.07015	0.10686	0.04132	0.03634	0.03656	0.03346	0.17217	0.02199	0.04093	0.111	0.11	0.115	0.092	0.086	0.071	0.062	0.084	0.083	0.104	2.36026	1.46869	2.13999	1.03435	0.973151	1.18588	1.24288	4.72033	0.610156	0.906363
5237.72	0.11423	0.07018	0.10719	0.04144	0.03641	0.03658	0.03338	0.17204	0.02204	0.04095	0.111	0.11	0.115	0.092	0.086	0.071	0.062	0.084	0.083	0.104	2.37002	1.46931	2.1466	1.03735	0.975026	1.18653	1.23991	4.71676	0.611544	0.906806
5239.64	0.11441	0.07009	0.1073	0.04143	0.03638	0.03659	0.03327	0.17199	0.02191	0.04083	0.111	0.11	0.115	0.092	0.086	0.071	0.062	0.084	0.083	0.104	2.37375	1.46743	2.1488	1.0371	0.974223	1.18686	1.23582	4.71539	0.607937	0.904149
5241.57	0.11426	0.06985	0.10709	0.04125	0.03619	0.03643	0.03308	0.17201	0.02163	0.04057	0.111	0.11	0.115	0.092	0.086	0.071	0.062	0.084	0.083	0.104	2.37064	1.4624	2.14459	1.0326	0.969135	1.18167	1.22876	4.71594	0.600167	0.898391
5243.5	0.11387	0.06942	0.10663	0.04107	0.03597	0.03617	0.03276	0.17199	0.02137	0.04013	0.111	0.11	0.115	0.092	0.086	0.071	0.062	0.084	0.083	0.104	2.36255	1.4534	2.13538	1.02809	0.963243	1.17323	1.21688	4.71539	0.592953	0.888648
5245.43	0.1133	0.06883	0.10603	0.04093	0.03577	0.03588	0.03233	0.17165	0.02114	0.03956	0.111	0.11	0.115	0.092	0.086	0.071	0.062	0.084	0.083	0.104	2.35072	1.44105	2.12337	1.02458	0.957887	1.16383	1.2009	4.70607	0.586571	0.876026
5247.36	0.11269	0.06807	0.10524	0.04073	0.03557	0.0356	0.03193	0.17098	0.02109	0.03895	0.111	0.11	0.115	0.092	0.086	0.071	0.062	0.084	0.083	0.104	2.33806	1.42514	2.10755	1.01958	0.952532	1.15474	1.18605	4.6877	0.585184	0.862518
5249.29	0.11161	0.0672	0.10405	0.04027	0.03525	0.03521	0.03161	0.16997	0.02107	0.0384	0.111	0.11	0.115	0.092	0.086	0.071	0.062	0.084	0.083	0.104	2.31566	1.40692	2.08371	1.00806	0.943962	1.14209	1.17416	4.66001	0.584629	0.850338
5251.22	0.1097	0.06628	0.10243	0.03949	0.03468	0.03458	0.03124	0.16858	0.02066	0.03781	0.111	0.11	0.115	0.092	0.086	0.071	0.062	0.084	0.083	0.104	2.27603	1.38766	2.05127	0.988538	0.928698	1.12166	1.16041	4.6219	0.573253	0.837273
5253.14	0.10761	0.06518	0.10059	0.03869	0.03404	0.03385	0.03075	0.16682	0.02007	0.03707	0.111	0.11	0.115	0.092	0.086	0.071	0.062	0.084	0.083	0.104	2.23267	1.36463	2.01442	0.968512	0.91156	1.09798	1.14221	4.57365	0.556882	0.820887
5255.07	0.10561	0.06381	0.09864	0.03793	0.03343	0.03313	0.03013	0.1645	0.01976	0.03622	0.111	0.11	0.115	0.092	0.086	0.071	0.062	0.084	0.083	0.104	2.19117	1.33595	1.97537	0.949487	0.895224	1.07463	1.11918	4.51004	0.54828	0.802064
5257	0.10312	0.06229	0.09652	0.03699	0.03264	0.03226	0.02944	0.16157	0.01946	0.0354	0.111	0.11	0.115	0.092	0.086	0.071	0.062	0.084	0.083	0.104	2.13951	1.30413	1.93292	0.925956	0.874069	1.04641	1.09355	4.42971	0.539956	0.783906
5258.93	0.10008	0.06063	0.09409	0.03587	0.03164	0.03123	0.02866	0.15825	0.01884	0.0345	0.111	0.11	0.115	0.092	0.086	0.071	0.062	0.084	0.083	0.104	2.07643	1.26937	1.88425	0.89792	0.84729	1.013	1.06458	4.33869	0.522753	0.763976
5260.86	0.09689	0.0587	0.09138	0.03472	0.03066	0.03019	0.0278	0.15459	0.01808	0.03334	0.111	0.11	0.115	0.092	0.086	0.071	0.062	0.084	0.083	0.104	2.01025	1.22896	1.82998	0.869132	0.821046	0.979262	1.03264	4.23834	0.501666	0.738289
5262.79	0.09374	0.05653	0.08839	0.03363	0.02983	0.02924	0.02687	0.15025	0.01752	0.03194	0.111	0.11	0.115	0.092	0.086	0.071	0.062	0.084	0.083	0.104	1.94489	1.18353	1.77011	0.841847	0.79882	0.948447	0.99809	4.11935	0.486127	0.707287
5264.71	0.09035	0.05436	0.08514	0.03249	0.02895	0.02824	0.02593	0.14515	0.01712	0.03054	0.111	0.11	0.115	0.092	0.086	0.071	0.062	0.084	0.083	0.104	1.87456	1.1381	1.70502	0.813309	0.775254	0.91601	0.963174	3.97953	0.475028	0.676285
5266.64	0.08659	0.05224	0.08164	0.03118	0.02782	0.02711	0.02501	0.13954	0.01657	0.02933	0.111	0.11	0.115	0.092	0.086	0.071	0.062	0.084	0.083	0.104	1.79655	1.09372	1.63493	0.780517	0.744994	0.879357	0.929	3.82572	0.459768	0.64949
5268.57	0.08269	0.05003	0.07796	0.02977	0.0266	0.02588	0.02401	0.13347	0.01592	0.02822	0.111	0.11	0.115	0.092	0.086	0.071	0.062	0.084	0.083	0.104	1.71563	1.04745	1.56123	0.745221	0.712323	0.83946	0.891855	3.6593	0.441732	0.62491
5270.5	0.07872	0.04778	0.07428	0.02835	0.02533	0.02461	0.02295	0.12697	0.01529	0.02702	0.111	0.11	0.115	0.092	0.086	0.071	0.062	0.084	0.083	0.104	1.63326	1.00034	1.48754	0.709674	0.678314	0.798265	0.852481	3.48109	0.424251	0.598337
5272.43	0.07463	0.04553	0.07063	0.02686	0.02401	0.02333	0.02193	0.12023	0.0146	0.02571	0.111	0.11	0.115	0.092	0.086	0.071	0.062	0.084	0.083	0.104	1.5484	0.953233	1.41444	0.672376	0.642965	0.756746	0.814593	3.29631	0.405106	0.569328
5274.36	0.07047	0.04315	0.06689	0.02531	0.0227	0.02208	0.02093	0.11337	0.01383	0.02437	0.111	0.11	0.115	0.092	0.086	0.071	0.062	0.084	0.083	0.104	1.46209	0.903404	1.33954	0.633575	0.607885	0.716201	0.777448	3.10823	0.383741	0.539655
5276.28	0.06638	0.0407	0.06314	0.02379	0.02143	0.0208	0.01986	0.10648	0.01299	0.023	0.111	0.11	0.115	0.092	0.086	0.071	0.062	0.084	0.083	0.104	1.37724	0.85211	1.26445	0.595526	0.573875	0.674682	0.737703	2.91933	0.360433	0.509317
5278.21	0.06241	0.03824	0.05953	0.02239	0.02021	0.01948	0.01875	0.0996	0.01219	0.0216	0.111	0.11	0.115	0.092	0.086	0.071	0.062	0.084	0.083	0.104	1.29487	0.800607	1.19215	0.56048	0.541205	0.631865	0.696472	2.7307	0.338236	0.478315
5280.14	0.05854	0.03579	0.05601	0.02109	0.01905	0.01826	0.01768	0.09279	0.01151	0.02024	0.111	0.11	0.115	0.092	0.086	0.071	0.062	0.084	0.083	0.104	1.21457	0.749312	1.12166	0.527938	0.510141	0.592293	0.656726	2.54399	0.319368	0.448199
5282.07	0.05479	0.0335	0.05255	0.01981	0.01792	0.01722	0.01669	0.08631	0.01088	0.019	0.111	0.11	0.115	0.092	0.086	0.071	0.062	0.084	0.083	0.104	1.13677	0.701368	1.05237	0.495896	0.479881	0.558559	0.619953	2.36633	0.301887	0.42074
5284	0.05126	0.0314	0.04922	0.01853	0.01683	0.0163	0.01577	0.08015	0.01023	0.01782	0.111	0.11	0.115	0.092	0.086	0.071	0.062	0.084	0.083	0.104	1.06353	0.657402	0.985684	0.463854	0.450692	0.528717	0.585779	2.19745	0.283852	0.39461
5285.93	0.04782	0.02944	0.04603	0.01725	0.01574	0.01529	0.01484	0.07423	0.00948	0.01676	0.111	0.11	0.115	0.092	0.086	0.071	0.062	0.084	0.083	0.104	0.992157	0.616367	0.921801	0.431812	0.421503	0.495956	0.551234	2.03514	0.263041	0.371137
5287.86	0.04451	0.02757	0.04298	0.01605	0.01469	0.01417	0.01385	0.06869	0.00871	0.01575	0.111	0.11	0.115	0.092	0.086	0.071	0.062	0.084	0.083	0.104	0.923482	0.577216	0.860721	0.401773	0.393385	0.459627	0.51446	1.88325	0.241676	0.348772
5289.78	0.04156	0.02573	0.04006	0.01498	0.01382	0.01311	0.01286	0.06349	0.00821	0.01468	0.111	0.11	0.115	0.092	0.086	0.071	0.062	0.084	0.083	0.104	0.862276	0.538693	0.802245	0.374988	0.370087	0.425244	0.477687	1.74068	0.227803	0.325077
5291.71	0.03882	0.02407	0.0373	0.0139	0.01309	0.01224	0.01201	0.05859	0.00789	0.01369	0.111	0.11	0.115	0.092	0.086	0.071	0.062	0.084	0.083	0.104	0.805428	0.503938	0.746973	0.347953	0.350538	0.397024	0.446113	1.60634	0.218924	0.303155
5293.64	0.03615	0.02258	0.03473	0.01281	0.01231	0.01145	0.0113	0.05408	0.00747	0.01289	0.111	0.11	0.115	0.092	0.086	0.071	0.062	0.084	0.083	0.104	0.750031	0.472743	0.695506	0.320668	0.32965	0.371399	0.41974	1.48269	0.20727	0.285439
5295.57	0.03367	0.0211	0.03233	0.01183	0.01146	0.01066	0.01061	0.04998	0.00697	0.01214	0.111	0.11	0.115	0.092	0.086	0.071	0.062	0.084	0.083	0.104	0.698577	0.441757	0.647443	0.296136	0.306888	0.345774	0.39411	1.37028	0.193397	0.268831
5297.5	0.03139	0.01963	0.03006	0.01104	0.01068	0.00991	0.00991	0.04631	0.00648	0.01131	0.111	0.11	0.115	0.092	0.086	0.071	0.062	0.084	0.083	0.104	0.651272	0.410981	0.601984	0.27636	0.286	0.321447	0.368109	1.26967	0.1798	0.250451
5299.43	0.02922	0.01828	0.0279	0.01039	0.00998	0.00924	0.00928	0.04291	0.00608	0.01055	0.111	0.11	0.115	0.092	0.086	0.071	0.062	0.084	0.083	0.104	0.606249	0.382717	0.558728	0.260089	0.267255	0.299714	0.344707	1.17645	0.168702	0.233622
5301.35	0.02713	0.01705	0.02589	0.00973	0.00931	0.00857	0.00878	0.03967	0.00575	0.00992	0.111	0.11	0.115	0.092	0.086	0.071	0.062	0.084	0.083	0.104	0.562886	0.356965	0.518475	0.243567	0.249313	0.277982	0.326135	1.08762	0.159545	0.219671
5303.28	0.02508	0.0159	0.02405	0.00899	0.00865	0.00787	0.0083	0.03664	0.00533	0.0093	0.111	0.11	0.115	0.092	0.086	0.071	0.062	0.084	0.083	0.104	0.520354	0.332888	0.481627	0.225043	0.231639	0.255276	0.308305	1.00455	0.147891	0.205941
5305.21	0.02327	0.01481	0.02241	0.00834	0.00812	0.00724	0.00776	0.0339	0.00487	0.00862	0.111	0.11	0.115	0.092	0.086	0.071	0.062	0.084	0.083	0.104	0.4828	0.310068	0.448785	0.208772	0.217446	0.234841	0.288246	0.929425	0.135128	0.190883
5307.14	0.02188	0.01378	0.02097	0.00786	0.00777	0.00677	0.00721	0.03139	0.00462	0.00793	0.111	0.11	0.115	0.092	0.086	0.071	0.062	0.084	0.083	0.104	0.453961	0.288503	0.419947	0.196756	0.208073	0.219596	0.267817	0.860609	0.128191	0.175604
5309.07	0.0206	0.01287	0.01956	0.00736	0.0074	0.00638	0.00675	0.02906	0.00453	0.00741	0.111	0.11	0.115	0.092	0.086	0.071	0.062	0.084	0.083	0.104	0.427404	0.269451	0.39171	0.18424	0.198165	0.206946	0.25073	0.796728	0.125694	0.164089
5311	0.01916	0.01204	0.01809	0.00676	0.00688	0.00595	0.00637	0.02695	0.00431	0.00703	0.111	0.11	0.115	0.092	0.086	0.071	0.062	0.084	0.083	0.104	0.397527	0.252074	0.362272	0.16922	0.18424	0.192998	0.236615	0.738879	0.11959	0.155674
5312.93	0.01774	0.01122	0.01672	0.00617	0.00628	0.0055	0.00598	0.02503	0.00397	0.00666	0.111	0.11	0.115	0.092	0.086	0.071	0.062	0.084	0.083	0.104	0.368065	0.234906	0.334836	0.154451	0.168173	0.178401	0.222128	0.686239	0.110156	0.147481
5314.85	0.01652	0.01046	0.01561	0.00565	0.00579	0.0051	0.00559	0.02324	0.00364	0.00626	0.111	0.11	0.115	0.092	0.086	0.071	0.062	0.084	0.083	0.104	0.342753	0.218994	0.312607	0.141434	0.155051	0.165427	0.207641	0.637163	0.100999	0.138623
5316.78	0.01539	0.0098	0.01463	0.00522	0.0055	0.00478	0.00523	0.02158	0.00339	0.00586	0.111	0.11	0.115	0.092	0.086	0.071	0.062	0.084	0.083	0.104	0.319308	0.205176	0.292982	0.13067	0.147285	0.155047	0.194269	0.591652	0.0940623	0.129765
5318.71	0.01428	0.00916	0.01361	0.00487	0.00531	0.00449	0.00495	0.02003	0.00325	0.00543	0.111	0.11	0.115	0.092	0.086	0.071	0.062	0.084	0.083	0.104	0.296278	0.191777	0.272555	0.121909	0.142197	0.14564	0.183869	0.549156	0.0901777	0.120243
5320.64	0.01325	0.00849	0.01257	0.00456	0.00504	0.00418	0.00469	0.01855	0.00309	0.00506	0.111	0.11	0.115	0.092	0.086	0.071	0.062	0.084	0.083	0.104	0.274908	0.17775	0.251728	0.114149	0.134967	0.135585	0.174211	0.508579	0.0857382	0.11205
5322.57	0.01216	0.00781	0.01162	0.0042	0.00462	0.00384	0.00436	0.01718	0.00272	0.00471	0.111	0.11	0.115	0.092	0.086	0.071	0.062	0.084	0.083	0.104	0.252293	0.163513	0.232703	0.105137	0.123719	0.124557	0.161953	0.471018	0.0754718	0.104299
5324.5	0.0111	0.0071	0.01075	0.00376	0.00419	0.00354	0.00398	0.01605	0.00231	0.0043	0.111	0.11	0.115	0.092	0.086	0.071	0.062	0.084	0.083	0.104	0.2303	0.148648	0.21528	0.0941226	0.112204	0.114826	0.147838	0.440037	0.0640955	0.0952202
5326.43	0.0104	0.00641	0.00998	0.00344	0.00397	0.00331	0.00366	0.01512	0.00218	0.00382	0.111	0.11	0.115	0.092	0.086	0.071	0.062	0.084	0.083	0.104	0.215777	0.134202	0.19986	0.0861122	0.106313	0.107365	0.135951	0.41454	0.0604884	0.084591
5328.35	0.0098	0.00589	0.00931	0.00325	0.00382	0.00303	0.00347	0.01416	0.00215	0.00345	0.111	0.11	0.115	0.092	0.086	0.071	0.062	0.084	0.083	0.104	0.203328	0.123315	0.186443	0.081356	0.102296	0.098283	0.128894	0.38822	0.059656	0.0763976
5330.28	0.00902	0.00555	0.00866	0.00301	0.0036	0.00271	0.00335	0.01313	0.00199	0.00325	0.111	0.11	0.115	0.092	0.086	0.071	0.062	0.084	0.083	0.104	0.187145	0.116197	0.173426	0.0753482	0.0964047	0.0879032	0.124436	0.359981	0.0552165	0.0719687
5332.21	0.00814	0.00529	0.00792	0.00266	0.0033	0.00247	0.0032	0.01215	0.00176	0.00308	0.111	0.11	0.115	0.092	0.086	0.071	0.062	0.084	0.083	0.104	0.168887	0.110753	0.158607	0.0665867	0.0883709	0.0801185	0.118865	0.333112	0.0488347	0.0682042
5334.14	0.00713	0.00492	0.0071	0.00226	0.00285	0.00226	0.0029	0.01126	0.0014	0.00276	0.111	0.11	0.115	0.092	0.086	0.071	0.062	0.084	0.083	0.104	0.147931	0.103007	0.142185	0.0565737	0.0763203	0.0733068	0.107721	0.308712	0.0388458	0.0611181
5336.07	0.00645	0.00439	0.00645	0.00202	0.00251	0.00212	0.00251	0.01058	0.00106	0.00226	0.111	0.11	0.115	0.092	0.086	0.071	0.062	0.084	0.083	0.104	0.133823	0.0919106	0.129168	0.0505659	0.0672155	0.0687656	0.0932344	0.290068	0.0294118	0.050046
5338	0.00636	0.0038	0.00612	0.00205	0.00257	0.00213	0.00217	0.01	0.00111	0.00185	0.111	0.11	0.115	0.092	0.086	0.071	0.062	0.084	0.083	0.104	0.131956	0.0795582	0.12256	0.0513168	0.0688222	0.06909	0.080605	0.274167	0.0307992	0.0409668
5339.92	0.00585	0.00339	0.00582	0.00193	0.00246	0.00198	0.00202	0.00923	0.00115	0.00181	0.111	0.11	0.115	0.092	0.086	0.071	0.062	0.084	0.083	0.104	0.121374	0.0709743	0.116552	0.0483129	0.0658765	0.0642245	0.0750332	0.253056	0.031909	0.0400811
5341.85	0.00495	0.00306	0.00537	0.00162	0.00206	0.00165	0.00194	0.00848	0.000838801	0.00182	0.111	0.11	0.115	0.092	0.086	0.071	0.062	0.084	0.083	0.104	0.102701	0.0640653	0.10754	0.0405528	0.0551649	0.0535204	0.0720616	0.232493	0.0232742	0.0403025
5343.78	0.00472	0.00274	0.00496	0.00154	0.00191	0.00152	0.00183	0.00805	0.000726938	0.00157	0.111	0.11	0.115	0.092	0.086	0.071	0.062	0.084	0.083	0.104	0.0979294	0.0573656	0.0993294	0.0385502	0.051148	0.0493037	0.0679756	0.220704	0.0201703	0.0347664
5345.71	0.00481	0.00257	0.00467	0.0016	0.00201	0.00153	0.00173	0.00768	0.000954285	0.00136	0.111	0.11	0.115	0.092	0.086	0.071	0.062	0.084	0.083	0.104	0.0997967	0.0538065	0.0935218	0.0400522	0.0538259	0.049628	0.0642611	0.21056	0.0264785	0.0301162
5347.64	0.00438	0.0025	0.00436	0.00141	0.0019	0.00137	0.00166	0.00704	0.00101	0.0014	0.111	0.11	0.115	0.092	0.086	0.071	0.062	0.084	0.083	0.104	0.0908751	0.0523409	0.0873137	0.035296	0.0508802	0.0444382	0.061661	0.193013	0.0280245	0.0310019
5349.57	0.0036	0.00239	0.00395	0.00106	0.00161	0.00103	0.00156	0.00634	0.000742197	0.00146	0.111	0.11	0.115	0.092	0.086	0.071	0.062	0.084	0.083	0.104	0.0746919	0.0500379	0.079103	0.0265346	0.0431143	0.0334097	0.0579465	0.173822	0.0205937	0.0323306
5351.49	0.00314	0.00222	0.00355	0.000894129	0.00148	0.000775382	0.00142	0.0059	0.000426114	0.00129	0.111	0.11	0.115	0.092	0.086	0.071	0.062	0.084	0.083	0.104	0.0651479	0.0464787	0.0710926	0.0223824	0.039633	0.0251508	0.0527461	0.161758	0.0118234	0.0285661
5353.42	0.00328	0.00204	0.00333	0.000990465	0.00166	0.000855759	0.00133	0.00565	0.000464737	0.00107	0.111	0.11	0.115	0.092	0.086	0.071	0.062	0.084	0.083	0.104	0.0680526	0.0427102	0.0666869	0.0247939	0.0444533	0.0277579	0.0494031	0.154904	0.0128951	0.0236943
5355.35	0.00334	0.00193	0.00316	0.00102	0.00176	0.00103	0.00137	0.00527	0.000743762	0.00102	0.111	0.11	0.115	0.092	0.086	0.071	0.062	0.084	0.083	0.104	0.0692975	0.0404072	0.0632824	0.0255333	0.0471312	0.0334097	0.0508889	0.144486	0.0206372	0.0225871
5357.28	0.0029	0.00189	0.00291	0.000853792	0.00161	0.00103	0.00141	0.00476	0.00088349	0.00106	0.111	0.11	0.115	0.092	0.086	0.071	0.062	0.084	0.083	0.104	0.0601685	0.0395697	0.0582759	0.0213726	0.0431143	0.0334097	0.0523747	0.130503	0.0245142	0.0234729
5359.21	0.00238	0.00189	0.00274	0.000677437	0.00144	0.000920787	0.00136	0.00434	0.00079973	0.00101	0.111	0.11	0.115	0.092	0.086	0.071	0.062	0.084	0.083	0.104	0.0493796	0.0395697	0.0548715	0.016958	0.0385619	0.0298672	0.0505174	0.118988	0.0221901	0.0223657
5361.14	0.0021	0.0018	0.00266	0.000552252	0.00138	0.000834152	0.00124	0.00404	0.000640333	0.000914976	0.111	0.11	0.115	0.092	0.086	0.071	0.062	0.084	0.083	0.104	0.0435703	0.0376855	0.0532694	0.0138243	0.0369551	0.0270571	0.04606	0.110763	0.0177673	0.0202614
5363.07	0.00199	0.00163	0.00255	0.000465482	0.00137	0.000802174	0.00116	0.00381	0.000639483	0.000857249	0.111	0.11	0.115	0.092	0.086	0.071	0.062	0.084	0.083	0.104	0.041288	0.0341263	0.0510665	0.0116522	0.0366873	0.0260198	0.0430884	0.104457	0.0177437	0.0189831
5364.99	0.00183	0.00146	0.00233	0.000384733	0.00136	0.000732705	0.00112	0.00357	0.000790805	0.000840932	0.111	0.11	0.115	0.092	0.086	0.071	0.062	0.084	0.083	0.104	0.0379684	0.0305671	0.0466608	0.00963087	0.0364195	0.0237665	0.0416026	0.0978775	0.0219425	0.0186218
5366.92	0.00164	0.00136	0.00206	0.000288993	0.00133	0.000625208	0.00107	0.00328	0.000833452	0.000821814	0.111	0.11	0.115	0.092	0.086	0.071	0.062	0.084	0.083	0.104	0.0340263	0.0284735	0.0412537	0.00723425	0.0356162	0.0202796	0.0397453	0.0899267	0.0231258	0.0181984
5368.85	0.00146	0.00124	0.00188	9.91225e-05	0.00125	0.000554398	0.00104	0.003	0.000701129	0.000752583	0.111	0.11	0.115	0.092	0.086	0.071	0.062	0.084	0.083	0.104	0.0302917	0.0259611	0.037649	0.00248129	0.0334738	0.0179828	0.038631	0.08225	0.0194542	0.0166654
5370.78	0.00113	0.00103	0.00178	-0.000184581	0.00107	0.000438899	0.000974461	0.00275	0.000462368	0.000687793	0.111	0.11	0.115	0.092	0.086	0.071	0.062	0.084	0.083	0.104	0.023445	0.0215645	0.0356464	-0.00462054	0.0286536	0.0142364	0.0361965	0.0753958	0.0128293	0.0152306
5372.71	0.000677867	0.000761583	0.0016	-0.00043346	0.000825137	0.000259802	0.000854835	0.00257	0.000128388	0.000629529	0.111	0.11	0.115	0.092	0.086	0.071	0.062	0.084	0.083	0.104	0.0140642	0.0159448	0.0320417	-0.0108506	0.0220964	0.0084271	0.031753	0.0704608	0.00356238	0.0139404
5374.64	0.000579513	0.000503465	0.00135	-0.000378922	0.000702009	0.00018993	0.000727758	0.00255	-4.94123e-05	0.000498533	0.111	0.11	0.115	0.092	0.086	0.071	0.062	0.084	0.083	0.104	0.0120236	0.0105407	0.0270352	-0.00948541	0.0187991	0.00616069	0.0270327	0.0699125	-0.00137104	0.0110396
5376.56	0.000938548	0.000367552	0.00121	-3.10093e-05	0.000795588	0.00030376	0.000676274	0.00253	0.000209764	0.000343442	0.111	0.11	0.115	0.092	0.086	0.071	0.062	0.084	0.083	0.104	0.0194728	0.0076952	0.0242316	-0.000776244	0.0213051	0.00985295	0.0251203	0.0693642	0.00582032	0.00760526
5378.49	0.00103	0.000390977	0.00113	0.000149682	0.000897348	0.000390693	0.000690475	0.00231	0.000554204	0.000327945	0.111	0.11	0.115	0.092	0.086	0.071	0.062	0.084	0.083	0.104	0.0213702	0.00818564	0.0226295	0.00374693	0.0240301	0.0126728	0.0256478	0.0633325	0.0153775	0.00726209
5380.42	0.000525728	0.000411078	0.000969976	-5.87851e-05	0.000810549	0.000273541	0.000735179	0.00199	0.000563458	0.000370115	0.111	0.11	0.115	0.092	0.086	0.071	0.062	0.084	0.083	0.104	0.0109077	0.00860648	0.0194248	-0.00147154	0.0217057	0.00887275	0.0273083	0.0545592	0.0156343	0.00819591
5382.35	-6.86105e-06	0.000268325	0.00075449	-0.000400379	0.000627011	5.45085e-05	0.000730634	0.00185	0.000303268	0.000299081	0.111	0.11	0.115	0.092	0.086	0.071	0.062	0.084	0.083	0.104	-0.000142351	0.00561775	0.0151095	-0.0100225	0.0167908	0.00176807	0.0271395	0.0507208	0.00841477	0.00662292
5384.28	6.90677e-05	5.39273e-05	0.000674382	-0.00052081	0.000601158	-5.30928e-05	0.000654966	0.00189	0.000163749	0.000148922	0.111	0.11	0.115	0.092	0.086	0.071	0.062	0.084	0.083	0.104	0.001433	0.00112904	0.0135052	-0.0130372	0.0160985	-0.00172215	0.0243288	0.0518175	0.00454354	0.00329776
5386.21	0.000444447	7.45058e-06	0.000784576	-0.000367656	0.000761718	8.55327e-06	0.000566557	0.00179	0.000325993	0.000151545	0.111	0.11	0.115	0.092	0.086	0.071	0.062	0.084	0.083	0.104	0.00922127	0.000155988	0.015712	-0.00920339	0.0203981	0.000277439	0.0210449	0.0490758	0.00904532	0.00335585
5388.14	0.000236148	0.000102878	0.000800073	-0.000309676	0.000788256	6.72042e-06	0.000518262	0.00149	0.000397041	0.000310153	0.111	0.11	0.115	0.092	0.086	0.071	0.062	0.084	0.083	0.104	0.00489954	0.00215389	0.0160223	-0.007752	0.0211088	0.000217988	0.0192509	0.0408508	0.0110167	0.0068681
5390.06	-0.000429692	0.000113875	0.000558495	-0.000519067	0.00053601	-0.000127077	0.0004545	0.00127	0.000132635	0.00033389	0.111	0.11	0.115	0.092	0.086	0.071	0.062	0.084	0.083	0.104	-0.00891514	0.00238413	0.0111845	-0.0129936	0.0143538	-0.00412195	0.0168825	0.0348192	0.00368022	0.00739374
5391.99	-0.000650851	-7.55489e-06	0.000298679	-0.000715271	0.000333205	-0.000162289	0.000318661	0.00128	-6.73235e-05	0.000160173	0.111	0.11	0.115	0.092	0.086	0.071	0.062	0.084	0.083	0.104	-0.0135037	-0.000158172	0.00598137	-0.0179051	0.00892292	-0.00526411	0.0118367	0.0350933	-0.00186802	0.00354691
5393.92	-0.000207134	-9.6038e-05	0.000273585	-0.000642896	0.000454903	7.03335e-06	0.000242546	0.0014	0.000157714	2.02805e-05	0.111	0.11	0.115	0.092	0.086	0.071	0.062	0.084	0.083	0.104	-0.00429756	-0.00201069	0.00547884	-0.0160934	0.0121819	0.000228138	0.00900941	0.0383833	0.00437609	0.000449096
5395.85	0.000195946	-0.000108302	0.000401854	-0.000453875	0.000712991	0.000138521	0.000314862	0.00142	0.000478625	3.00705e-05	0.111	0.11	0.115	0.092	0.086	0.071	0.062	0.084	0.083	0.104	0.00406544	-0.00226745	0.00804756	-0.0113617	0.0190932	0.00449315	0.0116956	0.0389317	0.0132804	0.000665888
5397.78	0.000185205	-0.000130609	0.000463948	-0.00034602	0.000851259	0.000121206	0.000438795	0.00124	0.000581399	0.000135332	0.111	0.11	0.115	0.092	0.086	0.071	0.062	0.084	0.083	0.104	0.00384259	-0.00273448	0.00929106	-0.00866178	0.0227959	0.00393151	0.0162991	0.0339967	0.0161321	0.00299682
5399.71	-8.09546e-05	-0.000152707	0.000400141	-0.000350788	0.000828922	5.08726e-05	0.000477046	0.00101	0.000478879	0.000238985	0.111	0.11	0.115	0.092	0.086	0.071	0.062	0.084	0.083	0.104	-0.00167963	-0.00319713	0.00801326	-0.00878114	0.0221978	0.00165014	0.01772	0.0276908	0.0132874	0.00529214
5401.64	-0.00030639	-0.000170857	0.000296548	-0.000409648	0.000746712	-4.30197e-05	0.0004296	0.000880063	0.000372604	0.000293255	0.111	0.11	0.115	0.092	0.086	0.071	0.062	0.084	0.083	0.104	-0.0063569	-0.00357712	0.0059387	-0.0102546	0.0199963	-0.00139541	0.0159576	0.0241284	0.0103386	0.00649391
5403.56	-0.000407818	-0.000196248	0.000262827	-0.000518233	0.000658542	-0.000134006	0.000404194	0.000791505	0.000394777	0.000277862	0.111	0.11	0.115	0.092	0.086	0.071	0.062	0.084	0.083	0.104	-0.0084613	-0.00410872	0.0052634	-0.0129727	0.0176351	-0.0043467	0.0150139	0.0217004	0.0109539	0.00615304
5405.49	-0.000609949	-0.000224471	0.000248626	-0.00073725	0.000489309	-0.000223413	0.0003656	0.000671819	0.000337347	0.000149906	0.111	0.11	0.115	0.092	0.086	0.071	0.062	0.084	0.083	0.104	-0.0126551	-0.00469961	0.00497901	-0.0184553	0.0131032	-0.00724676	0.0135803	0.018419	0.00936036	0.00331955
5407.42	-0.000889431	-0.000308543	0.000136018	-0.00094147	0.000295356	-0.000312746	0.00024727	0.000690565	4.42565e-05	-9.30429e-05	0.111	0.11	0.115	0.092	0.086	0.071	0.062	0.084	0.083	0.104	-0.0184537	-0.00645977	0.00272391	-0.0235675	0.00790936	-0.0101444	0.00918488	0.018933	0.00122798	-0.00206036
5409.35	-0.00102	-0.000464827	-7.9453e-05	-0.000960797	0.000214323	-0.000348643	0.00010103	0.000905007	-0.000241265	-0.000334099	0.111	0.11	0.115	0.092	0.086	0.071	0.062	0.084	0.083	0.104	-0.0211627	-0.00973179	-0.00159113	-0.0240513	0.00573937	-0.0113088	0.00375278	0.0248123	-0.00669438	-0.00739837
5411.28	-0.000825899	-0.000570938	-0.000273019	-0.000830531	0.00022988	-0.000315756	4.91738e-05	0.00112	-0.000277743	-0.000468478	0.111	0.11	0.115	0.092	0.086	0.071	0.062	0.084	0.083	0.104	-0.0171355	-0.0119534	-0.0054675	-0.0207904	0.00615597	-0.0102421	0.00182657	0.0307067	-0.00770653	-0.0103741
5413.21	-0.000241025	-0.000567913	-0.000211492	-0.000580609	0.000396758	-0.00018771	9.79006e-05	0.00121	3.71635e-05	-0.000476405	0.111	0.11	0.115	0.092	0.086	0.071	0.062	0.084	0.083	0.104	-0.00500073	-0.01189	-0.00423536	-0.0145342	0.0106248	-0.00608868	0.00363653	0.0331742	0.00103118	-0.0105496
5415.14	0.000133044	-0.000534877	4.80562e-05	-0.000417188	0.00063017	-7.27028e-05	0.000167519	0.00111	0.000426561	-0.000254095	0.111	0.11	0.115	0.092	0.086	0.071	0.062	0.084	0.083	0.104	0.00276036	-0.0111984	0.000962378	-0.0104433	0.0168754	-0.00235823	0.00622252	0.0304325	0.0118358	-0.00562674
5417.06	-6.67019e-05	-0.000524685	0.000235766	-0.000490636	0.000699624	-0.000150472	0.000245541	0.00087224	0.000536576	7.84099e-05	0.111	0.11	0.115	0.092	0.086	0.071	0.062	0.084	0.083	0.104	-0.00138391	-0.010985	0.00472147	-0.0122819	0.0187353	-0.0048808	0.00912066	0.0239139	0.0148884	0.00173633
5418.99	-0.000360996	-0.000485018	0.000300482	-0.000586256	0.000614762	-0.000260502	0.000331149	0.000643954	0.000442281	0.000226051	0.111	0.11	0.115	0.092	0.086	0.071	0.062	0.084	0.083	0.104	-0.00748985	-0.0101545	0.00601748	-0.0146755	0.0164628	-0.0084498	0.0123006	0.0176551	0.012272	0.00500573
5420.92	-0.000442785	-0.000372618	0.000282943	-0.000572592	0.000520021	-0.000276431	0.000397369	0.000514179	0.000338569	0.000158861	0.111	0.11	0.115	0.092	0.086	0.071	0.062	0.084	0.083	0.104	-0.00918679	-0.00780127	0.00566624	-0.0143335	0.0139257	-0.00896649	0.0147603	0.0140971	0.00939427	0.00351785
5422.85	-0.000585102	-0.00028348	0.000202671	-0.000577137	0.000470847	-0.000304893	0.000359744	0.000390291	0.00025028	6.27488e-05	0.111	0.11	0.115	0.092	0.086	0.071	0.062	0.084	0.083	0.104	-0.0121395	-0.00593504	0.00405871	-0.0144472	0.0126088	-0.0098897	0.0133627	0.0107005	0.00694452	0.00138952
5424.78	-0.000960428	-0.000335365	3.96967e-05	-0.000704482	0.000399113	-0.000461787	0.000221595	0.000306994	4.0099e-05	-2.78652e-05	0.111	0.11	0.115	0.092	0.086	0.071	0.062	0.084	0.083	0.104	-0.0199267	-0.00702132	0.00079497	-0.017635	0.0106879	-0.0149788	0.00823118	0.00841675	0.00111263	-0.000617053
5426.71	-0.00105	-0.000540987	-4.95315e-05	-0.000809222	0.000366062	-0.000545457	0.000115857	0.000409171	-0.000175789	-0.000191003	0.111	0.11	0.115	0.092	0.086	0.071	0.062	0.084	0.083	0.104	-0.0217851	-0.0113263	-0.000991922	-0.0202569	0.0098028	-0.0176928	0.00430353	0.0112181	-0.00487762	-0.00422961
5428.63	-0.00061142	-0.000673473	5.12004e-05	-0.0007146	0.000462979	-0.000345424	7.8857e-05	0.000609905	-9.99719e-05	-0.000313267	0.111	0.11	0.115	0.092	0.086	0.071	0.062	0.084	0.083	0.104	-0.0126856	-0.0141001	0.00102534	-0.0178883	0.0123981	-0.0112044	0.00292916	0.0167216	-0.00277392	-0.00693706
5430.56	-0.000503606	-0.000662506	7.10785e-05	-0.000656426	0.000404686	-0.000196174	5.49257e-05	0.000638083	2.07722e-05	-0.000298724	0.111	0.11	0.115	0.092	0.086	0.071	0.062	0.084	0.083	0.104	-0.0104487	-0.0138705	0.00142342	-0.0164321	0.0108371	-0.00636322	0.00204022	0.0174941	0.000576366	-0.00661501
5432.49	-0.000695722	-0.000649527	-4.71175e-05	-0.000738472	0.000233859	-0.000251606	0.000112012	0.000547558	-3.1814e-05	-0.00026615	0.111	0.11	0.115	0.092	0.086	0.071	0.062	0.084	0.083	0.104	-0.0144347	-0.0135987	-0.000943579	-0.0184859	0.00626253	-0.00816125	0.0041607	0.0150122	-0.000882743	-0.00589369
5434.42	-0.000530495	-0.000614718	-1.04308e-06	-0.000677496	0.000313669	-0.00024356	0.000246137	0.000492096	7.3716e-05	-0.000236705	0.111	0.11	0.115	0.092	0.086	0.071	0.062	0.084	0.083	0.104	-0.0110066	-0.01287	-2.08888e-05	-0.0169595	0.00839976	-0.00790026	0.0091428	0.0134916	0.0020454	-0.00524165
5436.35	-0.000544081	-0.000467479	0.000120401	-0.000613257	0.000412479	-0.000255197	0.000367522	0.000437692	0.000235647	-0.00014922	0.111	0.11	0.115	0.092	0.086	0.071	0.062	0.084	0.083	0.104	-0.0112885	-0.00978731	0.00241116	-0.0153514	0.0110458	-0.00827773	0.0136517	0.0120001	0.00653849	-0.00330436
5438.28	-0.000910824	-0.000374347	7.79033e-05	-0.00077118	0.000300795	-0.000398472	0.000314668	0.000414252	0.00013116	-0.000127271	0.111	0.11	0.115	0.092	0.086	0.071	0.062	0.084	0.083	0.104	-0.0188975	-0.00783746	0.0015601	-0.0193046	0.00805501	-0.0129251	0.0116884	0.0113574	0.00363929	-0.00281832
5440.2	-0.000966251	-0.000444442	-1.2517e-05	-0.000916779	0.00029394	-0.000517324	0.000120953	0.000531316	-5.66244e-06	-0.000239268	0.111	0.11	0.115	0.092	0.086	0.071	0.062	0.084	0.083	0.104	-0.0200475	-0.009305	-0.000250667	-0.0229494	0.00787144	-0.0167802	0.00449282	0.0145669	-0.000157116	-0.00529841
5442.13	-0.000860822	-0.000595063	-7.73072e-05	-0.000967249	0.000365078	-0.000621513	-4.48376e-05	0.000654772	-4.4927e-05	-0.000310838	0.111	0.11	0.115	0.092	0.086	0.071	0.062	0.084	0.083	0.104	-0.0178601	-0.0124585	-0.00154816	-0.0242128	0.00977645	-0.0201598	-0.0016655	0.0179517	-0.00124659	-0.00688327
5444.06	-0.000845634	-0.000750735	-0.000127703	-0.000954151	0.00037086	-0.000650674	-0.000104159	0.000702992	-9.03755e-05	-0.000327349	0.111	0.11	0.115	0.092	0.086	0.071	0.062	0.084	0.083	0.104	-0.017545	-0.0157177	-0.00255739	-0.0238849	0.00993129	-0.0211057	-0.003869	0.0192737	-0.00250765	-0.00724889
5445.99	-0.000701714	-0.000841886	-0.000102788	-0.000774905	0.000432968	-0.000501409	-1.58846e-05	0.000697687	-5.35697e-05	-0.000325471	0.111	0.11	0.115	0.092	0.086	0.071	0.062	0.084	0.083	0.104	-0.014559	-0.017626	-0.00205844	-0.0193979	0.0115945	-0.016264	-0.000590036	0.0191283	-0.0014864	-0.0072073
5447.92	-0.000443815	-0.000798598	-1.08033e-05	-0.000554502	0.000594959	-0.000316977	0.000150934	0.000608727	0.000105545	-0.000193805	0.111	0.11	0.115	0.092	0.086	0.071	0.062	0.084	0.083	0.104	-0.00920816	-0.0167197	-0.000216348	-0.0138806	0.0159324	-0.0102817	0.00560647	0.0166893	0.00292856	-0.00429166
5449.85	-0.000280346	-0.000657424	9.87351e-05	-0.000462651	0.000711441	-0.000284299	0.000233546	0.000446647	0.000334933	2.40505e-05	0.111	0.11	0.115	0.092	0.086	0.071	0.062	0.084	0.083	0.104	-0.00581655	-0.0137641	0.00197728	-0.0115814	0.0190517	-0.0092217	0.0086751	0.0122456	0.00929338	0.00053258
5451.77	-0.000344269	-0.000489637	0.000184193	-0.000513881	0.000607416	-0.000387043	0.000225067	0.000300765	0.000489652	0.000190482	0.111	0.11	0.115	0.092	0.086	0.071	0.062	0.084	0.083	0.104	-0.00714281	-0.0102512	0.00368867	-0.0128638	0.016266	-0.0125544	0.00836015	0.00824597	0.0135864	0.00421808
5453.7	-0.000493574	-0.000359103	0.000261307	-0.000620171	0.000394925	-0.000459552	0.000187472	0.000246897	0.000488401	0.000250116	0.111	0.11	0.115	0.092	0.086	0.071	0.062	0.084	0.083	0.104	-0.0102405	-0.00751831	0.00523296	-0.0155245	0.0105757	-0.0149063	0.00696368	0.00676909	0.0135517	0.00553863
5455.63	-0.000584928	-0.000322208	0.000292331	-0.000703171	0.000297889	-0.000418454	0.000153109	0.00027135	0.000423744	0.000207022	0.111	0.11	0.115	0.092	0.086	0.071	0.062	0.084	0.083	0.104	-0.0121359	-0.00674586	0.00585425	-0.0176022	0.00797719	-0.0135732	0.00568726	0.00743951	0.0117576	0.00458434
5457.56	-0.000776121	-0.000424072	0.000187337	-0.00074619	0.00032106	-0.000396371	0.000138342	0.000248462	0.000314683	0.000113621	0.111	0.11	0.115	0.092	0.086	0.071	0.062	0.084	0.083	0.104	-0.0161028	-0.00887853	0.00375163	-0.0186791	0.00859769	-0.0128569	0.00513874	0.006812	0.00873151	0.00251605
5459.49	-0.000856375	-0.000590995	8.09729e-05	-0.000744417	0.000376552	-0.000418618	0.000126749	0.000212088	0.000256151	2.26498e-06	0.111	0.11	0.115	0.092	0.086	0.071	0.062	0.084	0.083	0.104	-0.0177679	-0.0123733	0.00162157	-0.0186347	0.0100837	-0.0135786	0.00470811	0.00581475	0.00710742	5.01562e-05
5461.42	-0.000679211	-0.000624999	0.000106603	-0.000730291	0.000393629	-0.00043124	0.000129581	0.000256941	0.000349999	-5.02616e-05	0.111	0.11	0.115	0.092	0.086	0.071	0.062	0.084	0.083	0.104	-0.0140921	-0.0130852	0.00213484	-0.0182811	0.010541	-0.013988	0.00481331	0.00704447	0.00971142	-0.001113
5463.35	-0.000550028	-0.000555143	0.000131294	-0.000726953	0.000299111	-0.000453845	0.000154793	0.000332907	0.000424102	-2.16067e-05	0.111	0.11	0.115	0.092	0.086	0.071	0.062	0.084	0.083	0.104	-0.0114118	-0.0116227	0.00262931	-0.0181975	0.00800991	-0.0147212	0.00574981	0.0091272	0.0117676	-0.000478464
5465.27	-0.000532069	-0.000512913	9.88096e-05	-0.000709608	0.000236675	-0.000433669	0.00018321	0.000372887	0.00040862	2.66135e-05	0.111	0.11	0.115	0.092	0.086	0.071	0.062	0.084	0.083	0.104	-0.0110392	-0.0107385	0.00197877	-0.0177633	0.00633794	-0.0140668	0.00680536	0.0102233	0.011338	0.000589335
5467.2	-0.000417386	-0.000469074	0.000123575	-0.000678301	0.000314608	-0.000349894	0.000224844	0.00036405	0.000438422	7.84099e-05	0.111	0.11	0.115	0.092	0.086	0.071	0.062	0.084	0.083	0.104	-0.00865982	-0.0098207	0.00247472	-0.0169796	0.00842491	-0.0113494	0.00835187	0.00998104	0.0121649	0.00173633
5469.13	-0.00040169	-0.000394434	0.000182718	-0.000687763	0.000413314	-0.000331745	0.00030686	0.000293225	0.00047335	0.000119418	0.111	0.11	0.115	0.092	0.086	0.071	0.062	0.084	0.083	0.104	-0.00833416	-0.00825801	0.00365913	-0.0172165	0.0110682	-0.0107607	0.0113984	0.00803925	0.013134	0.00264442
5471.06	-0.00075529	-0.000427395	9.74387e-05	-0.000858426	0.000307217	-0.000466779	0.000337258	0.00017564	0.000295118	6.08265e-05	0.111	0.11	0.115	0.092	0.086	0.071	0.062	0.084	0.083	0.104	-0.0156706	-0.0089481	0.00195132	-0.0214886	0.00822699	-0.0151407	0.0125275	0.00481546	0.00818864	0.00134696
5472.99	-0.000963367	-0.000567928	-7.50274e-05	-0.000993103	0.000151515	-0.000572205	0.000291258	0.00013043	4.52846e-05	-0.000115365	0.111	0.11	0.115	0.092	0.086	0.071	0.062	0.084	0.083	0.104	-0.0199877	-0.0118903	-0.00150251	-0.02486	0.00405743	-0.0185604	0.0108188	0.00357596	0.00125651	-0.00255467
5474.92	-0.000506494	-0.000618503	-4.63277e-05	-0.000854999	0.000225782	-0.000452459	0.000241697	0.000233591	0.000151396	-0.000219151	0.111	0.11	0.115	0.092	0.086	0.071	0.062	0.084	0.083	0.104	-0.0105086	-0.0129492	-0.000927763	-0.0214029	0.00604623	-0.0146762	0.00897787	0.00640429	0.00420078	-0.00485293
5476.85	-3.64021e-05	-0.00048548	0.000177592	-0.000747219	0.000348538	-0.000319079	0.000278488	0.000262409	0.000420347	-0.000125378	0.111	0.11	0.115	0.092	0.086	0.071	0.062	0.084	0.083	0.104	-0.000755262	-0.0101642	0.00355647	-0.0187048	0.00933352	-0.0103498	0.0103445	0.00719438	0.0116634	-0.0027764
5478.77	-8.22633e-05	-0.000342444	0.000295937	-0.000860214	0.0003061	-0.000344843	0.000390053	0.00017646	0.000482574	3.95924e-05	0.111	0.11	0.115	0.092	0.086	0.071	0.062	0.084	0.083	0.104	-0.00170678	-0.00716953	0.00592646	-0.0215334	0.00819707	-0.0111855	0.0144886	0.00483794	0.01339	0.000876743
5480.7	-0.000316432	-0.000321716	0.000275135	-0.000908956	0.000265166	-0.000396282	0.00048928	0.000118405	0.000435963	0.000148669	0.111	0.11	0.115	0.092	0.086	0.071	0.062	0.084	0.083	0.104	-0.00656525	-0.00673556	0.00550988	-0.0227535	0.0071009	-0.012854	0.0181744	0.00324627	0.0120967	0.00329216
5482.63	-0.000527116	-0.000369847	0.000259846	-0.000784531	0.000317022	-0.000451699	0.000534132	0.000141174	0.000335783	0.000182495	0.111	0.11	0.115	0.092	0.086	0.071	0.062	0.084	0.083	0.104	-0.0109365	-0.00774325	0.0052037	-0.0196389	0.00848955	-0.0146516	0.0198404	0.00387052	0.00931697	0.00404121
5484.56	-0.000692797	-0.000374854	0.000262991	-0.000684306	0.000346988	-0.000573873	0.000523806	0.000163168	0.000186741	0.000159532	0.111	0.11	0.115	0.092	0.086	0.071	0.062	0.084	0.083	0.104	-0.014374	-0.00784808	0.00526668	-0.01713	0.00929202	-0.0186145	0.0194569	0.00447352	0.0051815	0.00353271
5486.49	-0.000714652	-0.000365391	0.000221759	-0.0006897	0.000378475	-0.000646964	0.000417531	0.000199929	0.000154406	8.29995e-05	0.111	0.11	0.115	0.092	0.086	0.071	0.062	0.084	0.083	0.104	-0.0148274	-0.00764996	0.00444097	-0.017265	0.0101352	-0.0209853	0.0155093	0.00548139	0.0042843	0.00183796
5488.42	-0.000651006	-0.000400677	0.000107363	-0.000755563	0.000421569	-0.000628874	0.000239968	0.000276267	0.000195324	3.35723e-05	0.111	0.11	0.115	0.092	0.086	0.071	0.062	0.084	0.083	0.104	-0.0135069	-0.00838872	0.00215006	-0.0189137	0.0112892	-0.0203985	0.00891365	0.00757432	0.00541965	0.000743433
5490.35	-0.000519082	-0.000456035	5.79655e-05	-0.000791475	0.000481844	-0.000590712	0.000105113	0.00038664	0.000179917	2.81483e-05	0.111	0.11	0.115	0.092	0.086	0.071	0.062	0.084	0.083	0.104	-0.0107698	-0.00954771	0.00116082	-0.0198127	0.0129033	-0.0191607	0.00390444	0.0106004	0.00499215	0.000623322
5492.27	-0.000225778	-0.000474259	0.000189647	-0.000718281	0.000580132	-0.000475496	7.6592e-05	0.000475079	0.000306204	-1.32024e-05	0.111	0.11	0.115	0.092	0.086	0.071	0.062	0.084	0.083	0.104	-0.00468438	-0.00992926	0.00379789	-0.0179804	0.0155354	-0.0154235	0.00284502	0.0130251	0.00849624	-0.000292357
5494.2	-8.16795e-05	-0.00044246	0.000410259	-0.000661254	0.000585824	-0.000310957	0.000141293	0.000452444	0.00054352	-3.54648e-06	0.111	0.11	0.115	0.092	0.086	0.071	0.062	0.084	0.083	0.104	-0.00169467	-0.0092635	0.00821588	-0.0165529	0.0156878	-0.0100864	0.00524835	0.0124045	0.015081	-7.85341e-05
5496.13	-0.000191349	-0.000414982	0.000551999	-0.000730529	0.000466272	-0.00024657	0.000208974	0.000363678	0.000561699	0.000130922	0.111	0.11	0.115	0.092	0.086	0.071	0.062	0.084	0.083	0.104	-0.00397006	-0.00868821	0.0110544	-0.018287	0.0124863	-0.0079979	0.00776237	0.00997084	0.0155855	0.00289917
5498.06	-0.000249579	-0.000403926	0.000635207	-0.000804886	0.000406399	-0.000261933	0.000205904	0.000315577	0.00049904	0.000251994	0.111	0.11	0.115	0.092	0.086	0.071	0.062	0.084	0.083	0.104	-0.0051782	-0.00845674	0.0127207	-0.0201484	0.010883	-0.00849622	0.00764834	0.00865207	0.0138469	0.00558021
5499.99	-0.000254551	-0.000381321	0.000671238	-0.000776559	0.000432611	-0.000282973	0.000198647	0.000293955	0.000541031	0.000309497	0.111	0.11	0.115	0.092	0.086	0.071	0.062	0.084	0.083	0.104	-0.00528136	-0.00798348	0.0134423	-0.0194393	0.0115849	-0.00917869	0.00737877	0.00805927	0.015012	0.00685357
5501.92	-0.000327547	-0.000332713	0.000653639	-0.000681281	0.000447005	-0.000301197	0.000268087	0.000260755	0.000556558	0.000388831	0.111	0.11	0.115	0.092	0.086	0.071	0.062	0.084	0.083	0.104	-0.00679586	-0.0069658	0.0130898	-0.0170542	0.0119704	-0.00976981	0.00995813	0.00714903	0.0154428	0.00861036
5503.84	-0.000354604	-0.000304788	0.000604033	-0.00064455	0.000419006	-0.000323042	0.000357732	0.000259429	0.000474066	0.000469908	0.111	0.11	0.115	0.092	0.086	0.071	0.062	0.084	0.083	0.104	-0.00735723	-0.00638115	0.0120964	-0.0161348	0.0112206	-0.0104784	0.013288	0.00711268	0.0131539	0.0104058
5505.77	-0.000236345	-0.000283003	0.00055477	-0.000700265	0.00035575	-0.000320926	0.000405043	0.000321284	0.000419259	0.00049983	0.111	0.11	0.115	0.092	0.086	0.071	0.062	0.084	0.083	0.104	-0.00490363	-0.00592505	0.0111099	-0.0175295	0.00952665	-0.0104098	0.0150454	0.00880854	0.0116332	0.0110684
5507.7	6.89097e-06	-0.000210449	0.000527456	-0.00072071	0.000334725	-0.000293553	0.000426337	0.000418067	0.000448883	0.000484154	0.111	0.11	0.115	0.092	0.086	0.071	0.062	0.084	0.083	0.104	0.000142972	-0.00440604	0.0105629	-0.0180413	0.00896362	-0.00952187	0.0158364	0.011462	0.0124552	0.0107212
5509.63	0.000130978	-0.000151262	0.000489026	-0.000690252	0.000348583	-0.000315994	0.000406042	0.00045304	0.000467181	0.000427276	0.111	0.11	0.115	0.092	0.086	0.071	0.062	0.084	0.083	0.104	0.0027175	-0.00316688	0.00979328	-0.0172788	0.00933473	-0.0102498	0.0150825	0.0124208	0.0129629	0.0094617
5511.56	-6.12455e-06	-0.000206709	0.000440165	-0.000691965	0.000359744	-0.000408515	0.000383988	0.000439063	0.000389963	0.000333995	0.111	0.11	0.115	0.092	0.086	0.071	0.062	0.084	0.083	0.104	-0.000127071	-0.00432773	0.00881478	-0.0173217	0.00963361	-0.0132508	0.0142633	0.0120376	0.0108203	0.00739606
5513.49	-0.000205245	-0.000310481	0.000388101	-0.000723422	0.000366852	-0.000462532	0.000410616	0.000486448	0.000315964	0.000227392	0.111	0.11	0.115	0.092	0.086	0.071	0.062	0.084	0.083	0.104	-0.00425837	-0.00650034	0.00777214	-0.0181091	0.00982396	-0.015003	0.0152524	0.0133368	0.00876705	0.00503542
5515.41	-0.000260807	-0.000312552	0.000462174	-0.000705048	0.000384718	-0.000451282	0.000505686	0.000568464	0.00034824	0.000143468	0.111	0.11	0.115	0.092	0.086	0.071	0.062	0.084	0.083	0.104	-0.00541116	-0.0065437	0.00925554	-0.0176492	0.0103024	-0.0146381	0.0187838	0.0155854	0.00966261	0.00317699
5517.34	-0.000277253	-0.000285476	0.000608191	-0.000672013	0.000395909	-0.000447437	0.000627339	0.000571549	0.000412777	0.000142619	0.111	0.11	0.115	0.092	0.086	0.071	0.062	0.084	0.083	0.104	-0.00575238	-0.00597683	0.0121797	-0.0168222	0.0106021	-0.0145133	0.0233026	0.01567	0.0114533	0.00315819
5519.27	-0.000329031	-0.000293538	0.000658259	-0.00074634	0.000349999	-0.000481978	0.000627816	0.000498414	0.000462949	0.000202	0.111	0.11	0.115	0.092	0.086	0.071	0.062	0.084	0.083	0.104	-0.00682665	-0.00614562	0.0131824	-0.0186828	0.00937265	-0.0156337	0.0233203	0.0136649	0.0128454	0.00447313
5521.2	-0.000282581	-0.000257492	0.00061892	-0.000861853	0.000293091	-0.000501156	0.000526011	0.000508428	0.000555754	0.000202835	0.111	0.11	0.115	0.092	0.086	0.071	0.062	0.084	0.083	0.104	-0.00586292	-0.00539095	0.0123945	-0.0215744	0.0078487	-0.0162558	0.0195388	0.0139394	0.0154205	0.00449163
5523.13	-0.000153875	-0.000213951	0.000578105	-0.000870541	0.000258148	-0.000436023	0.000472978	0.000606283	0.000647247	0.000169009	0.111	0.11	0.115	0.092	0.086	0.071	0.062	0.084	0.083	0.104	-0.00319256	-0.00447936	0.0115772	-0.0217919	0.00691296	-0.0141431	0.0175688	0.0166223	0.0179592	0.00374257
5525.06	-9.41019e-05	-0.000231117	0.000550121	-0.000800535	0.000208527	-0.000376836	0.000455782	0.000643015	0.000666872	0.000217691	0.111	0.11	0.115	0.092	0.086	0.071	0.062	0.084	0.083	0.104	-0.0019524	-0.00483875	0.0110168	-0.0200395	0.00558416	-0.0122233	0.0169301	0.0176293	0.0185037	0.0048206
5526.99	-9.02986e-05	-0.000236616	0.000530943	-0.000771746	0.00017111	-0.000428721	0.000400707	0.000583246	0.000639945	0.000319898	0.111	0.11	0.115	0.092	0.086	0.071	0.062	0.084	0.083	0.104	-0.00187349	-0.00495388	0.0106327	-0.0193188	0.00458217	-0.0139063	0.0148843	0.0159907	0.0177565	0.0070839
5528.91	-7.2354e-05	-0.000190109	0.000526518	-0.000808239	0.000191197	-0.000489116	0.000379697	0.000563309	0.00059253	0.00032106	0.111	0.11	0.115	0.092	0.086	0.071	0.062	0.084	0.083	0.104	-0.00150118	-0.00398019	0.0105441	-0.0202323	0.00512008	-0.0158653	0.0141039	0.0154441	0.0164409	0.00710963
5530.84	-9.31068e-05	-0.000172809	0.000560015	-0.000835031	0.000239059	-0.000454456	0.00041759	0.000618666	0.000568584	0.000182077	0.111	0.11	0.115	0.092	0.086	0.071	0.062	0.084	0.083	0.104	-0.00193176	-0.00361799	0.0112149	-0.020903	0.00640178	-0.014741	0.0155114	0.0169618	0.0157765	0.00403196
5532.77	-0.000128254	-0.000245437	0.000618041	-0.000840098	0.000271842	-0.000444397	0.000411898	0.000675529	0.000547215	4.87566e-05	0.111	0.11	0.115	0.092	0.086	0.071	0.062	0.084	0.083	0.104	-0.00266098	-0.00513856	0.0123769	-0.0210298	0.00727968	-0.0144147	0.0153	0.0185208	0.0151836	0.00107968
5534.7	-4.20176e-05	-0.000317052	0.000651494	-0.000879422	0.000302494	-0.000521168	0.0003528	0.000725582	0.00050503	8.34465e-05	0.111	0.11	0.115	0.092	0.086	0.071	0.062	0.084	0.083	0.104	-0.000871771	-0.00663792	0.0130469	-0.0220142	0.00810051	-0.0169049	0.0131048	0.019893	0.0140131	0.00184786
5536.63	0.000104315	-0.0002563	0.000631779	-0.000912234	0.000377864	-0.000567704	0.000336498	0.000723839	0.000460744	0.000199184	0.111	0.11	0.115	0.092	0.086	0.071	0.062	0.084	0.083	0.104	0.0021643	-0.00536599	0.0126521	-0.0228356	0.0101188	-0.0184144	0.0124993	0.0198453	0.0127843	0.00441078
5538.56	0.000175756	-9.54866e-05	0.000593022	-0.000885144	0.000415713	-0.000537038	0.000393868	0.000690654	0.000452742	0.000229865	0.111	0.11	0.115	0.092	0.086	0.071	0.062	0.084	0.083	0.104	0.00364654	-0.00199914	0.0118759	-0.0221575	0.0111324	-0.0174197	0.0146303	0.0189354	0.0125622	0.00509018
5540.48	0.000179277	4.90844e-05	0.000584081	-0.000843361	0.000369206	-0.000469685	0.000451639	0.000695214	0.000459716	0.000213713	0.111	0.11	0.115	0.092	0.086	0.071	0.062	0.084	0.083	0.104	0.00371959	0.00102765	0.0116969	-0.0211115	0.00988699	-0.015235	0.0167762	0.0190605	0.0127557	0.00473251
5542.41	0.000154113	7.04229e-05	0.000615224	-0.000848606	0.000280783	-0.000451982	0.000444785	0.000725985	0.000442818	0.000246063	0.111	0.11	0.115	0.092	0.086	0.071	0.062	0.084	0.083	0.104	0.0031975	0.0014744	0.0123205	-0.0212428	0.00751911	-0.0146608	0.0165216	0.0199041	0.0122869	0.00544888
5544.34	0.000104063	-2.33054e-05	0.000629827	-0.000850156	0.000197411	-0.000504404	0.000397682	0.000730887	0.000405416	0.000289515	0.111	0.11	0.115	0.092	0.086	0.071	0.062	0.084	0.083	0.104	0.00215907	-0.00048793	0.012613	-0.0212816	0.00528648	-0.0163612	0.014772	0.0200385	0.0112491	0.00641109
5546.27	6.48779e-05	-0.000153497	0.000634685	-0.000851974	0.00014703	-0.000517383	0.000367537	0.000748724	0.000389025	0.000325486	0.111	0.11	0.115	0.092	0.086	0.071	0.062	0.084	0.083	0.104	0.00134607	-0.00321367	0.0127103	-0.0213271	0.00393733	-0.0167822	0.0136522	0.0205275	0.0107943	0.00720764
5548.2	2.40532e-05	-0.000216916	0.000645489	-0.000869721	0.000206307	-0.000464961	0.000366285	0.000804991	0.000390738	0.000279412	0.111	0.11	0.115	0.092	0.086	0.071	0.062	0.084	0.083	0.104	0.00049905	-0.00454143	0.0129266	-0.0217714	0.00552471	-0.0150818	0.0136057	0.0220702	0.0108418	0.00618736
5550.13	2.72307e-05	-0.000194997	0.000678256	-0.000926673	0.000346467	-0.000482291	0.000348061	0.000838786	0.000377312	0.000135452	0.111	0.11	0.115	0.092	0.086	0.071	0.062	0.084	0.083	0.104	0.000564976	-0.00408253	0.0135828	-0.023197	0.00927806	-0.0156439	0.0129288	0.0229967	0.0104693	0.00299948
5552.06	9.39319e-05	-0.000161514	0.000715688	-0.00093852	0.000415772	-0.000553221	0.000300974	0.000845686	0.000425443	8.75443e-05	0.111	0.11	0.115	0.092	0.086	0.071	0.062	0.084	0.083	0.104	0.00194888	-0.00338152	0.0143324	-0.0234936	0.011134	-0.0179446	0.0111797	0.0231859	0.0118048	0.0019386
5553.98	0.00014019	-0.000128448	0.000646055	-0.00089699	0.000383303	-0.000573829	0.000267193	0.000843361	0.000528768	0.000229687	0.111	0.11	0.115	0.092	0.086	0.071	0.062	0.084	0.083	0.104	0.00290863	-0.00268923	0.012938	-0.022454	0.0102645	-0.0186131	0.00992493	0.0231221	0.0146717	0.00508624
5555.91	0.000177179	-0.000104859	0.00046879	-0.000853732	0.000353068	-0.000558972	0.000293404	0.000801146	0.000537664	0.000415623	0.111	0.11	0.115	0.092	0.086	0.071	0.062	0.084	0.083	0.104	0.00367607	-0.00219537	0.00938803	-0.0213711	0.00945483	-0.0181312	0.0108985	0.0219648	0.0149186	0.00920365
5557.84	0.000265964	-0.000137061	0.000398234	-0.000748441	0.000334978	-0.000528842	0.000268251	0.000761733	0.000441357	0.000525653	0.111	0.11	0.115	0.092	0.086	0.071	0.062	0.084	0.083	0.104	0.00551815	-0.00286956	0.00797507	-0.0187354	0.0089704	-0.0171538	0.00996423	0.0208842	0.0122463	0.0116402
5559.77	0.000333201	-0.000192448	0.000506222	-0.000560477	0.000283435	-0.000501841	0.000191435	0.000797525	0.000381023	0.00052011	0.111	0.11	0.115	0.092	0.086	0.071	0.062	0.084	0.083	0.104	0.00691317	-0.00402916	0.0101376	-0.0140302	0.00759013	-0.016278	0.00711088	0.0218655	0.0105722	0.0115174
5561.7	0.000283078	-0.00021334	0.00063698	-0.000520542	0.000278115	-0.000493139	0.000248805	0.000921115	0.000424683	0.000444934	0.111	0.11	0.115	0.092	0.086	0.071	0.062	0.084	0.083	0.104	0.00587323	-0.00446656	0.0127562	-0.0130305	0.00744766	-0.0159958	0.0092419	0.0252539	0.0117837	0.00985272
5563.63	0.000185257	-0.000169858	0.000682592	-0.000718787	0.000323877	-0.00049971	0.000411078	0.00105	0.000463218	0.00038448	0.111	0.11	0.115	0.092	0.086	0.071	0.062	0.084	0.083	0.104	0.00384367	-0.00355621	0.0136696	-0.0179931	0.00867312	-0.0162089	0.0152696	0.0287875	0.0128529	0.00851401
5565.56	0.000176707	-0.000105575	0.000570372	-0.000936389	0.00033769	-0.000503227	0.000437141	0.00111	0.000408188	0.000384316	0.111	0.11	0.115	0.092	0.086	0.071	0.062	0.084	0.083	0.104	0.00366627	-0.00221036	0.0114223	-0.0234403	0.00904302	-0.016323	0.0162377	0.0304325	0.011326	0.00851038
5567.48	0.000223381	-6.27488e-05	0.000398278	-0.001	0.000327662	-0.000482351	0.000324085	0.00107	0.000357062	0.000400007	0.111	0.11	0.115	0.092	0.086	0.071	0.062	0.084	0.083	0.104	0.00463465	-0.00131373	0.00797595	-0.0250326	0.00877448	-0.0156458	0.0120382	0.0293358	0.0099074	0.00885785
5569.41	0.000223251	-5.47171e-05	0.000388503	-0.000936255	0.000327945	-0.000478268	0.000248358	0.000975445	0.00039643	0.000480473	0.111	0.11	0.115	0.092	0.086	0.071	0.062	0.084	0.083	0.104	0.00463196	-0.00114558	0.00778019	-0.0234369	0.00878206	-0.0155134	0.0092253	0.0267435	0.0109997	0.0106397
5571.34	0.000209159	-5.41657e-05	0.000558153	-0.000855103	0.000290483	-0.000569135	0.000222996	0.000919253	0.000522911	0.000628054	0.111	0.11	0.115	0.092	0.086	0.071	0.062	0.084	0.083	0.104	0.00433958	-0.00113403	0.0111776	-0.0214055	0.00777886	-0.0184608	0.00828322	0.0252029	0.0145092	0.0139078
5573.27	0.000297318	-3.11434e-06	0.000700861	-0.000839591	0.000284344	-0.000639498	0.000181109	0.000978917	0.000623926	0.000739858	0.111	0.11	0.115	0.092	0.086	0.071	0.062	0.084	0.083	0.104	0.00616868	-6.5203e-05	0.0140355	-0.0210172	0.00761447	-0.0207432	0.00672732	0.0268386	0.0173121	0.0163836
5575.2	0.00039555	9.50396e-05	0.000745147	-0.000920936	0.000353888	-0.000604004	0.000183404	0.00107	0.000603706	0.000644878	0.111	0.11	0.115	0.092	0.086	0.071	0.062	0.084	0.083	0.104	0.00820677	0.00198978	0.0149224	-0.0230534	0.00947679	-0.0195918	0.00681257	0.0293358	0.016751	0.0142803
5577.13	0.000393975	0.0001169	0.000752985	-0.000989705	0.000389516	-0.000546828	0.000273794	0.00108	0.000491336	0.000383541	0.111	0.11	0.115	0.092	0.086	0.071	0.062	0.084	0.083	0.104	0.00817409	0.00244746	0.0150793	-0.0247749	0.0104309	-0.0177373	0.0101701	0.02961	0.0136331	0.00849322
5579.05	0.00039097	3.68953e-05	0.000715807	-0.000938788	0.000353843	-0.000565708	0.000328407	0.00105	0.000387892	0.000244975	0.111	0.11	0.115	0.092	0.086	0.071	0.062	0.084	0.083	0.104	0.00811175	0.000772453	0.0143348	-0.0235003	0.00947559	-0.0183497	0.0121987	0.0287875	0.0107628	0.00542478
5580.98	0.000446987	-4.70877e-05	0.000642806	-0.000866488	0.00031051	-0.000584975	0.000279039	0.00109	0.00033626	0.000353649	0.111	0.11	0.115	0.092	0.086	0.071	0.062	0.084	0.083	0.104	0.00927397	-0.000985845	0.0128729	-0.0216905	0.00831517	-0.0189746	0.0103649	0.0298842	0.0093302	0.00783129
5582.91	0.000484049	-8.80361e-05	0.000591338	-0.000829786	0.000268951	-0.000576526	0.000238255	0.00115	0.000363693	0.000514939	0.111	0.11	0.115	0.092	0.086	0.071	0.062	0.084	0.083	0.104	0.0100429	-0.00184316	0.0118422	-0.0207717	0.00720226	-0.0187006	0.00885002	0.0315292	0.0100914	0.0114029
5584.84	0.000455488	-7.06613e-05	0.000589415	-0.000764713	0.000167251	-0.000580221	0.000259414	0.00113	0.000455916	0.000583336	0.111	0.11	0.115	0.092	0.086	0.071	0.062	0.084	0.083	0.104	0.00945035	-0.00147939	0.0118037	-0.0191428	0.00447883	-0.0188204	0.00963597	0.0309808	0.0126503	0.0129175
5586.77	0.000357965	8.01683e-06	0.000624418	-0.000705928	8.26269e-05	-0.000586152	0.000310838	0.00106	0.00050731	0.000513747	0.111	0.11	0.115	0.092	0.086	0.071	0.062	0.084	0.083	0.104	0.00742697	0.000167843	0.0125046	-0.0176712	0.00221267	-0.0190128	0.0115461	0.0290617	0.0140763	0.0113765
5588.7	0.000219	9.77069e-05	0.000690788	-0.000706956	0.000123575	-0.000548631	0.00040029	0.00102	0.000489712	0.000360206	0.111	0.11	0.115	0.092	0.086	0.071	0.062	0.084	0.083	0.104	0.00454376	0.00204563	0.0138338	-0.017697	0.00330922	-0.0177957	0.0148688	0.027965	0.013588	0.00797648
5590.62	0.000170873	9.60231e-05	0.000721201	-0.000710845	0.000213951	-0.000543565	0.000465274	0.00101	0.000507683	0.000273481	0.111	0.11	0.115	0.092	0.086	0.071	0.062	0.084	0.083	0.104	0.00354523	0.00201037	0.0144428	-0.0177943	0.00572941	-0.0176314	0.0172827	0.0276908	0.0140867	0.00605603
5592.55	0.00027082	1.50204e-05	0.000738472	-0.000741452	0.000227064	-0.000603423	0.000395149	0.00101	0.000548974	0.000308841	0.111	0.11	0.115	0.092	0.086	0.071	0.062	0.084	0.083	0.104	0.00561891	0.000314473	0.0147887	-0.0185605	0.00608056	-0.019573	0.0146779	0.0276908	0.0152324	0.00683905
5594.48	0.000342305	-4.47482e-05	0.000765547	-0.000876918	0.000167385	-0.000636056	0.000273794	0.00102	0.000547409	0.00038898	0.111	0.11	0.115	0.092	0.086	0.071	0.062	0.084	0.083	0.104	0.00710206	-0.000936865	0.0153309	-0.0219515	0.00448241	-0.0206315	0.0101701	0.027965	0.015189	0.00861366
5596.41	0.000298454	-5.21392e-05	0.000672087	-0.00101	0.000100255	-0.000651881	0.00028488	0.00106	0.00054583	0.000449598	0.111	0.11	0.115	0.092	0.086	0.071	0.062	0.084	0.083	0.104	0.00619225	-0.00109161	0.0134593	-0.0252829	0.00268474	-0.0211448	0.0105819	0.0290617	0.0151451	0.009956
5598.34	0.000266123	-2.37823e-05	0.000475824	-0.000993818	0.000104293	-0.00068675	0.000381529	0.00104	0.000513971	0.000434622	0.111	0.11	0.115	0.092	0.086	0.071	0.062	0.084	0.083	0.104	0.00552145	-0.000497915	0.00952889	-0.0248779	0.00279287	-0.0222758	0.014172	0.0285133	0.0142611	0.00962437
5600.27	0.000262447	3.82066e-05	0.000317916	-0.000917584	0.000150606	-0.00071317	0.000393003	0.00094445	0.000399739	0.000313968	0.111	0.11	0.115	0.092	0.086	0.071	0.062	0.084	0.083	0.104	0.00544518	0.000799907	0.00636661	-0.0229695	0.00403309	-0.0231328	0.0145982	0.0258937	0.0110916	0.00695258
5602.2	0.000207779	0.000116095	0.000251994	-0.000935316	0.000124887	-0.000713527	0.000317365	0.000854462	0.00032106	0.000178903	0.111	0.11	0.115	0.092	0.086	0.071	0.062	0.084	0.083	0.104	0.00431095	0.00243061	0.00504645	-0.0234134	0.00334436	-0.0231444	0.0117886	0.0234265	0.00890845	0.00396167
5604.12	0.000212163	0.000151336	0.000256032	-0.000974208	6.23167e-05	-0.000724629	0.000299796	0.000828192	0.000345156	0.000197902	0.111	0.11	0.115	0.092	0.086	0.071	0.062	0.084	0.083	0.104	0.0044019	0.00316843	0.00512732	-0.024387	0.00166878	-0.0235045	0.011136	0.0227063	0.00957704	0.00438239
5606.05	0.000320275	0.000118107	0.000259087	-0.000963286	7.58618e-05	-0.00080505	0.000330865	0.000868574	0.000369221	0.000319958	0.111	0.11	0.115	0.092	0.086	0.071	0.062	0.084	0.083	0.104	0.00664498	0.00247273	0.0051885	-0.0241136	0.00203151	-0.0261131	0.01229	0.0238134	0.0102448	0.00708522
5607.98	0.000402861	7.22408e-05	0.000240788	-0.000957012	0.000110671	-0.000899926	0.000322506	0.000904635	0.000330582	0.000449851	0.111	0.11	0.115	0.092	0.086	0.071	0.062	0.084	0.083	0.104	0.00835846	0.00151246	0.00482204	-0.0239565	0.00296367	-0.0291906	0.0119795	0.0248021	0.00917265	0.0099616
5609.91	0.000400914	5.30034e-05	0.000271916	-0.000944704	0.00011161	-0.000919014	0.000321016	0.000830546	0.000280544	0.000591189	0.111	0.11	0.115	0.092	0.086	0.071	0.062	0.084	0.083	0.104	0.00831806	0.0011097	0.00544541	-0.0236484	0.00298881	-0.0298097	0.0119242	0.0227708	0.00778425	0.0130914
5611.84	0.000356721	5.19901e-05	0.000309169	-0.000892118	0.000149101	-0.000876397	0.000355586	0.000690445	0.000240341	0.000714436	0.111	0.11	0.115	0.092	0.086	0.071	0.062	0.084	0.083	0.104	0.00740116	0.00108848	0.00619145	-0.022332	0.00399279	-0.0284274	0.0132083	0.0189297	0.00666874	0.0158206
5613.77	0.00032564	4.91589e-05	0.000358328	-0.000829056	0.000185758	-0.000838846	0.000387028	0.000694588	0.000270024	0.000696346	0.111	0.11	0.115	0.092	0.086	0.071	0.062	0.084	0.083	0.104	0.0067563	0.00102921	0.00717591	-0.0207534	0.00497443	-0.0272093	0.0143762	0.0190433	0.00749235	0.01542
5615.69	0.000283624	1.12206e-05	0.000478178	-0.000815123	0.000146016	-0.000809491	0.000380605	0.000841841	0.000350386	0.000519589	0.111	0.11	0.115	0.092	0.086	0.071	0.062	0.084	0.083	0.104	0.00588456	0.000234919	0.00957603	-0.0204047	0.00391017	-0.0262572	0.0141376	0.0230805	0.00972216	0.0115059
5617.62	0.000228404	1.20848e-05	0.000541881	-0.000839859	8.17627e-05	-0.000762314	0.000355542	0.000939384	0.000360459	0.000355318	0.111	0.11	0.115	0.092	0.086	0.071	0.062	0.084	0.083	0.104	0.00473887	0.000253012	0.0108518	-0.0210239	0.00218953	-0.0247269	0.0132067	0.0257548	0.0100017	0.00786824
5619.55	0.000219378	5.66393e-05	0.000499263	-0.000907928	8.08388e-05	-0.000712812	0.00031805	0.000890955	0.000341937	0.000341147	0.111	0.11	0.115	0.092	0.086	0.071	0.062	0.084	0.083	0.104	0.0045516	0.00118582	0.00999828	-0.0227278	0.00216479	-0.0231212	0.011814	0.024427	0.00948772	0.00755444
5621.48	0.000253684	4.28855e-05	0.000502244	-0.000931457	0.000149503	-0.000699446	0.000277519	0.00083074	0.000401095	0.000417277	0.111	0.11	0.115	0.092	0.086	0.071	0.062	0.084	0.083	0.104	0.00526337	0.000897866	0.010058	-0.0233168	0.00400355	-0.0226877	0.0103085	0.0227761	0.0111292	0.00924028
5623.41	0.00029194	-2.76119e-05	0.000583753	-0.000839218	0.000209108	-0.000701293	0.000291973	0.000901535	0.000494823	0.000497341	0.111	0.11	0.115	0.092	0.086	0.071	0.062	0.084	0.083	0.104	0.0060571	-0.000578093	0.0116903	-0.0210078	0.00559972	-0.0227476	0.0108454	0.0247171	0.0137298	0.0110132
5625.34	0.000308276	3.27826e-07	0.000608578	-0.000705257	0.000190601	-0.000666142	0.000377968	0.000969961	0.00053519	0.00053972	0.111	0.11	0.115	0.092	0.086	0.071	0.062	0.084	0.083	0.104	0.00639603	6.86348e-06	0.0121874	-0.0176544	0.00510412	-0.0216074	0.0140397	0.0265931	0.0148499	0.0119517
5627.27	0.000277851	0.000167683	0.00056906	-0.00068669	0.000151336	-0.000700504	0.000426501	0.000895903	0.000524491	0.000506014	0.111	0.11	0.115	0.092	0.086	0.071	0.062	0.084	0.083	0.104	0.00576478	0.00351067	0.011396	-0.0171896	0.00405264	-0.022722	0.0158424	0.0245627	0.014553	0.0112053
5629.19	0.000197031	0.00027661	0.000614628	-0.000805602	0.000102729	-0.000816464	0.000353396	0.000750855	0.000481919	0.000406176	0.111	0.11	0.115	0.092	0.086	0.071	0.062	0.084	0.083	0.104	0.00408795	0.00579121	0.0123086	-0.0201663	0.00275099	-0.0264833	0.013127	0.0205859	0.0133718	0.00899446
5631.12	0.000169975	0.000206649	0.000690073	-0.000895768	-1.36197e-05	-0.000820875	0.000226214	0.000658944	0.000458449	0.000349015	0.111	0.11	0.115	0.092	0.086	0.071	0.062	0.084	0.083	0.104	0.0035266	0.00432648	0.0138195	-0.0224234	-0.000364723	-0.0266264	0.00840276	0.018066	0.0127206	0.00772867
5633.05	0.000264125	7.27922e-05	0.000664905	-0.00084354	-8.97944e-05	-0.000699043	0.000167266	0.000697523	0.000452191	0.000396952	0.111	0.11	0.115	0.092	0.086	0.071	0.062	0.084	0.083	0.104	0.00548	0.001524	0.0133154	-0.021116	-0.00240461	-0.0226746	0.00621312	0.0191238	0.0125469	0.0087902
5634.98	0.000327176	3.49283e-05	0.000560746	-0.000730008	3.38107e-05	-0.000631973	0.000167817	0.000809684	0.000384167	0.000487104	0.111	0.11	0.115	0.092	0.086	0.071	0.062	0.084	0.083	0.104	0.00678817	0.000731272	0.0112295	-0.018274	0.000905419	-0.0204991	0.00623359	0.0221988	0.0106595	0.0107865
5636.91	0.0001997	6.16759e-05	0.000512421	-0.00074549	0.000263944	-0.000691831	0.000120223	0.000865534	0.000304967	0.000552982	0.111	0.11	0.115	0.092	0.086	0.071	0.062	0.084	0.083	0.104	0.00414333	0.00129127	0.0102618	-0.0186616	0.00706817	-0.0224407	0.0044657	0.0237301	0.00846192	0.0122454
5638.84	1.74779e-05	7.00355e-05	0.000540063	-0.000905573	0.000371426	-0.000764832	3.06219e-05	0.000821531	0.000339955	0.00057666	0.111	0.11	0.115	0.092	0.086	0.071	0.062	0.084	0.083	0.104	0.000362627	0.00146629	0.0108153	-0.0226689	0.00994644	-0.0248086	0.00113746	0.0225236	0.00943273	0.0127697
5640.77	1.97091e-07	2.04146e-05	0.000590011	-0.00104	0.000370294	-0.000788838	1.36644e-05	0.000790745	0.00044027	0.000506237	0.111	0.11	0.115	0.092	0.086	0.071	0.062	0.084	0.083	0.104	4.08919e-06	0.000427407	0.0118156	-0.0260339	0.00991613	-0.0255872	0.000507566	0.0216796	0.0122162	0.0112102
5642.69	0.000115834	-2.02805e-05	0.000610396	-0.000963166	0.000309408	-0.000797227	0.000135407	0.000873551	0.000476584	0.000427067	0.111	0.11	0.115	0.092	0.086	0.071	0.062	0.084	0.083	0.104	0.00240329	-0.0004246	0.0122238	-0.0241106	0.00828566	-0.0258593	0.00502971	0.0239499	0.0132238	0.00945707
5644.62	0.000199016	1.4618e-05	0.000588179	-0.000769928	0.000130102	-0.000751749	0.00032267	0.000968486	0.000455931	0.000468582	0.111	0.11	0.115	0.092	0.086	0.071	0.062	0.084	0.083	0.104	0.00412913	0.000306048	0.0117789	-0.0192733	0.00348401	-0.0243842	0.0119856	0.0265527	0.0126507	0.0103764
5646.55	0.000235394	9.79155e-05	0.000595063	-0.000747651	-3.18587e-05	-0.000688583	0.00039345	0.000962988	0.000405788	0.000556678	0.111	0.11	0.115	0.092	0.086	0.071	0.062	0.084	0.083	0.104	0.0048839	0.00204999	0.0119168	-0.0187157	-0.000853146	-0.0223353	0.0146148	0.0264019	0.0112594	0.0123272
5648.48	0.000341882	0.000135034	0.000645056	-0.00094378	-5.92023e-05	-0.000681549	0.0003203	0.000903964	0.000347227	0.000531793	0.111	0.11	0.115	0.092	0.086	0.071	0.062	0.084	0.083	0.104	0.00709328	0.00282712	0.0129179	-0.0236253	-0.00158538	-0.0221071	0.0118976	0.0247837	0.0096345	0.0117761
5650.41	0.000421026	0.000113919	0.00068377	-0.0011	-1.01328e-05	-0.000730529	0.000245616	0.00087592	0.000360161	0.0004161	0.111	0.11	0.115	0.092	0.086	0.071	0.062	0.084	0.083	0.104	0.00873534	0.00238505	0.0136932	-0.0275359	-0.000271347	-0.0236959	0.00912345	0.0240148	0.00999338	0.00921421
5652.34	0.000367609	5.09024e-05	0.000685379	-0.00108	3.64184e-05	-0.000776991	0.000263795	0.000839531	0.000445649	0.000331789	0.111	0.11	0.115	0.092	0.086	0.071	0.062	0.084	0.083	0.104	0.00762706	0.00106571	0.0137255	-0.0270352	0.000975251	-0.025203	0.00979871	0.0230171	0.0123654	0.00734721
5654.27	0.000273572	-7.92742e-06	0.00064823	-0.000997543	6.17951e-05	-0.000799865	0.000290662	0.000751495	0.000521079	0.000347167	0.111	0.11	0.115	0.092	0.086	0.071	0.062	0.084	0.083	0.104	0.005676	-0.000165971	0.0129815	-0.0249711	0.00165482	-0.0259449	0.0107967	0.0206035	0.0144584	0.00768775
5656.19	0.000250882	-3.72529e-05	0.000559166	-0.000962779	7.90805e-05	-0.00082396	0.000260219	0.000704795	0.000529185	0.000416607	0.111	0.11	0.115	0.092	0.086	0.071	0.062	0.084	0.083	0.104	0.00520524	-0.00077994	0.0111979	-0.0241009	0.0021177	-0.0267265	0.00966588	0.0193231	0.0146833	0.00922544
5658.12	0.000292162	-5.31524e-05	0.000439927	-0.00102	5.80549e-05	-0.000870168	0.000206366	0.000775084	0.000503942	0.000497237	0.111	0.11	0.115	0.092	0.086	0.071	0.062	0.084	0.083	0.104	0.0060617	-0.00111282	0.00881002	-0.0255333	0.00155466	-0.0282253	0.0076655	0.0212502	0.0139829	0.0110109
5660.05	0.000375209	-4.7341e-05	0.000355378	-0.00106	-2.99215e-05	-0.000853196	0.000124559	0.000871807	0.000447959	0.000569776	0.111	0.11	0.115	0.092	0.086	0.071	0.062	0.084	0.083	0.104	0.00778474	-0.000991148	0.00711683	-0.0265346	-0.00080127	-0.0276748	0.00462676	0.023902	0.0124295	0.0126173
5661.98	0.000467318	1.35153e-05	0.000366375	-0.001	-7.12722e-05	-0.000745863	8.76188e-05	0.00089781	0.000372291	0.000584513	0.111	0.11	0.115	0.092	0.086	0.071	0.062	0.084	0.083	0.104	0.0096958	0.000282961	0.00733706	-0.0250326	-0.0019086	-0.0241933	0.00325461	0.024615	0.01033	0.0129436
5663.91	0.00044959	5.95003e-05	0.000440955	-0.000917599	6.03497e-06	-0.000647351	0.000124514	0.000834882	0.000372425	0.000534937	0.111	0.11	0.115	0.092	0.086	0.071	0.062	0.084	0.083	0.104	0.00932798	0.00124572	0.0088306	-0.0229699	0.000161611	-0.0209979	0.00462509	0.0228897	0.0103337	0.0118458
5665.84	0.000300657	6.89328e-05	0.000518992	-0.000897407	0.000119418	-0.000643879	0.000156537	0.000721231	0.000396684	0.000483677	0.111	0.11	0.115	0.092	0.086	0.071	0.062	0.084	0.083	0.104	0.00623796	0.0014432	0.0103934	-0.0224644	0.0031979	-0.0208853	0.00581459	0.0197737	0.0110068	0.0107107
5667.76	0.000147744	6.47306e-05	0.000591666	-0.00098294	0.000151858	-0.000691101	0.000154719	0.000603259	0.000372946	0.000459447	0.111	0.11	0.115	0.092	0.086	0.071	0.062	0.084	0.083	0.104	0.00306536	0.00135522	0.0118488	-0.0246056	0.00406662	-0.022417	0.00574706	0.0165394	0.0103481	0.0101741
5669.69	0.000165824	8.8796e-05	0.000690609	-0.00108	0.000119463	-0.000711039	0.00019896	0.000561804	0.000356972	0.000470087	0.111	0.11	0.115	0.092	0.086	0.071	0.062	0.084	0.083	0.104	0.00344047	0.00185907	0.0138302	-0.0270352	0.00319911	-0.0230637	0.0073904	0.0154028	0.0099049	0.0104097
5671.62	0.000338488	0.000160143	0.000752211	-0.00105	8.58456e-05	-0.000713199	0.000317216	0.000634894	0.000367567	0.000481233	0.111	0.11	0.115	0.092	0.086	0.071	0.062	0.084	0.083	0.104	0.00702286	0.00335281	0.0150638	-0.0262842	0.00229887	-0.0231338	0.011783	0.0174067	0.0101989	0.0106565
5673.55	0.000469965	0.000235155	0.000641555	-0.000967607	9.46522e-05	-0.000761598	0.000375852	0.000728026	0.000373319	0.00048703	0.111	0.11	0.115	0.092	0.086	0.071	0.062	0.084	0.083	0.104	0.00975072	0.00492329	0.0128478	-0.0242217	0.0025347	-0.0247037	0.0139611	0.01996	0.0103585	0.0107849
5675.48	0.000422225	0.00024876	0.00039418	-0.000980184	0.000154868	-0.000795215	0.000346005	0.000760749	0.000401214	0.000515416	0.111	0.11	0.115	0.092	0.086	0.071	0.062	0.084	0.083	0.104	0.00876022	0.00520813	0.00789388	-0.0245366	0.00414722	-0.0257941	0.0128524	0.0208572	0.0111325	0.0114135
5677.41	0.000350078	0.000222847	0.000262871	-0.000998706	0.000208035	-0.000783756	0.000300258	0.000801742	0.00038065	0.000504166	0.111	0.11	0.115	0.092	0.086	0.071	0.062	0.084	0.083	0.104	0.00726333	0.00466561	0.00526428	-0.0250002	0.00557098	-0.0254224	0.0111531	0.0219811	0.0105619	0.0111644
5679.33	0.000404994	0.00020884	0.000331685	-0.000929564	0.000209823	-0.000823841	0.000279829	0.000908926	0.000303805	0.000443935	0.111	0.11	0.115	0.092	0.086	0.071	0.062	0.084	0.083	0.104	0.00840271	0.00437235	0.00664235	-0.0232694	0.00561886	-0.0267226	0.0103943	0.0249197	0.00842967	0.0098306
5681.26	0.000475733	0.000194877	0.000419542	-0.00089708	0.000203997	-0.000877664	0.000283554	0.00101	0.00028412	0.000376597	0.111	0.11	0.115	0.092	0.086	0.071	0.062	0.084	0.083	0.104	0.00987039	0.00408002	0.00840178	-0.0224563	0.00546285	-0.0284685	0.0105327	0.0276908	0.00788347	0.00833945
5683.19	0.000456514	0.000165045	0.000532627	-0.000939131	0.000209361	-0.00086911	0.000309929	0.00103	0.000350013	0.000332132	0.111	0.11	0.115	0.092	0.086	0.071	0.062	0.084	0.083	0.104	0.00947164	0.00345544	0.0106664	-0.0235089	0.00560649	-0.028191	0.0115124	0.0282392	0.00971181	0.00735481
5685.12	0.000425777	0.000104517	0.000733167	-0.000935808	0.000217676	-0.000763565	0.000287399	0.000940993	0.000428185	0.000334457	0.111	0.11	0.115	0.092	0.086	0.071	0.062	0.084	0.083	0.104	0.00883391	0.00218821	0.0146825	-0.0234257	0.00582916	-0.0247675	0.0106755	0.0257989	0.0118808	0.00740629
5687.05	0.000476088	2.54512e-05	0.000818417	-0.000862718	0.000223547	-0.00067082	0.000196859	0.000778675	0.000505835	0.000322729	0.111	0.11	0.115	0.092	0.086	0.071	0.062	0.084	0.083	0.104	0.00987775	0.000532856	0.0163897	-0.0215961	0.00598638	-0.0217591	0.00731236	0.0213487	0.0140354	0.00714659
5688.98	0.00051929	7.7188e-06	0.000678733	-0.00080198	0.000248402	-0.000680596	0.000129312	0.000581667	0.000565782	0.00023748	0.111	0.11	0.115	0.092	0.086	0.071	0.062	0.084	0.083	0.104	0.0107741	0.000161604	0.0135924	-0.0200757	0.00665197	-0.0220762	0.00480332	0.0159474	0.0156987	0.00525881
5690.9	0.000473294	5.62966e-05	0.000479549	-0.000794321	0.000265032	-0.000776246	9.40263e-05	0.000488341	0.000626847	0.000205115	0.111	0.11	0.115	0.092	0.086	0.071	0.062	0.084	0.083	0.104	0.00981978	0.00117865	0.00960349	-0.0198839	0.00709731	-0.0251788	0.00349262	0.0133887	0.0173931	0.00454211
5692.83	0.000386067	4.56423e-05	0.000448227	-0.000796497	0.000259235	-0.000809997	0.000107467	0.000511602	0.000712529	0.000283673	0.111	0.11	0.115	0.092	0.086	0.071	0.062	0.084	0.083	0.104	0.00801002	0.000955584	0.00897623	-0.0199384	0.00694207	-0.0262736	0.00399188	0.0140264	0.0197705	0.00628172
5694.76	0.000390691	2.87145e-05	0.000587687	-0.000830591	0.000247538	-0.000768095	0.000207126	0.000611454	0.000721112	0.000407204	0.111	0.11	0.115	0.092	0.086	0.071	0.062	0.084	0.083	0.104	0.00810596	0.000601177	0.0117691	-0.0207919	0.00662884	-0.0249144	0.00769373	0.016764	0.0200087	0.00901722
5696.69	0.00048493	0.000134662	0.00070484	-0.000891954	0.000235856	-0.000742122	0.000316232	0.000757679	0.000618056	0.000488967	0.111	0.11	0.115	0.092	0.086	0.071	0.062	0.084	0.083	0.104	0.0100612	0.00281933	0.0141152	-0.0223279	0.006316	-0.0240719	0.0117465	0.020773	0.0171492	0.0108278
5698.62	0.000574653	0.000271127	0.000746652	-0.000909179	0.000224173	-0.000743225	0.000406563	0.00085023	0.000516668	0.000523597	0.111	0.11	0.115	0.092	0.086	0.071	0.062	0.084	0.083	0.104	0.0119228	0.00567641	0.0149525	-0.0227591	0.00600314	-0.0241077	0.0151018	0.0233105	0.014336	0.0115947
5700.55	0.000585416	0.000290409	0.000743538	-0.000894576	0.000206411	-0.000758514	0.000477165	0.00075753	0.000457674	0.00052169	0.111	0.11	0.115	0.092	0.086	0.071	0.062	0.084	0.083	0.104	0.0121461	0.00608011	0.0148902	-0.0223936	0.00552749	-0.0246036	0.0177244	0.0207689	0.0126991	0.0115524
5702.48	0.000518664	0.000213921	0.000606358	-0.000858784	0.000222653	-0.000786468	0.000470653	0.00057742	0.000423387	0.000516981	0.111	0.11	0.115	0.092	0.086	0.071	0.062	0.084	0.083	0.104	0.0107611	0.00447873	0.012143	-0.0214976	0.00596244	-0.0255104	0.0174825	0.0158309	0.0117477	0.0114481
5704.4	0.000441166	0.000146687	0.000429511	-0.000805139	0.000309318	-0.000749528	0.000393793	0.000539124	0.000412494	0.000481919	0.111	0.11	0.115	0.092	0.086	0.071	0.062	0.084	0.083	0.104	0.0091532	0.00307109	0.00860142	-0.0201547	0.00828325	-0.0243122	0.0146275	0.014781	0.0114455	0.0106717
5706.33	0.000374711	0.000130132	0.000402659	-0.000759959	0.000386983	-0.000668585	0.00031507	0.000657767	0.00045757	0.000345603	0.111	0.11	0.115	0.092	0.086	0.071	0.062	0.084	0.083	0.104	0.00777441	0.00272449	0.00806368	-0.0190238	0.010363	-0.0216866	0.0117033	0.0180338	0.0126962	0.00765311
5708.26	0.000303845	0.000149727	0.000546634	-0.000807196	0.00035806	-0.000663608	0.000267014	0.000686973	0.000545412	0.000238508	0.111	0.11	0.115	0.092	0.086	0.071	0.062	0.084	0.083	0.104	0.0063041	0.00313474	0.0109469	-0.0202062	0.00958851	-0.0215252	0.00991828	0.0188345	0.0151335	0.00528158
5710.19	0.000278712	0.000147075	0.000686735	-0.000951111	0.000238076	-0.000717819	0.000222981	0.00061205	0.000586227	0.000342637	0.111	0.11	0.115	0.092	0.086	0.071	0.062	0.084	0.083	0.104	0.00578265	0.00307922	0.0137526	-0.0238088	0.00637545	-0.0232836	0.00828267	0.0167804	0.016266	0.00758743
5712.12	0.000293557	9.83626e-05	0.000769317	-0.00103	0.000129432	-0.000752732	0.000207096	0.000704512	0.000567228	0.00052768	0.111	0.11	0.115	0.092	0.086	0.071	0.062	0.084	0.083	0.104	0.00609065	0.00205936	0.0154064	-0.0257836	0.00346607	-0.0244161	0.00769261	0.0193154	0.0157389	0.0116851
5714.05	0.000326343	4.23938e-05	0.000771761	-0.000947297	0.000112057	-0.000750095	0.000234857	0.000906512	0.000581339	0.000615075	0.111	0.11	0.115	0.092	0.086	0.071	0.062	0.084	0.083	0.104	0.00677088	0.000887572	0.0154554	-0.0237133	0.00300078	-0.0243305	0.0087238	0.0248535	0.0161304	0.0136204
5715.98	0.000415739	4.42565e-06	0.000717238	-0.000840128	0.000169232	-0.000684872	0.000283927	0.000940412	0.000591546	0.000608921	0.111	0.11	0.115	0.092	0.086	0.071	0.062	0.084	0.083	0.104	0.00862565	9.2657e-05	0.0143635	-0.0210306	0.00453188	-0.0222149	0.0105465	0.025783	0.0164136	0.0134841
5717.9	0.000530259	3.5286e-05	0.000709161	-0.00088343	0.00022614	-0.00059557	0.000334993	0.000785574	0.000546753	0.000509694	0.111	0.11	0.115	0.092	0.086	0.071	0.062	0.084	0.083	0.104	0.0110017	0.000738761	0.0142017	-0.0221146	0.00605582	-0.0193183	0.0124434	0.0215378	0.0151707	0.0112868
5719.83	0.000542988	0.000140861	0.000729829	-0.000962764	0.000209361	-0.000594854	0.000342116	0.000663504	0.000514075	0.000341058	0.111	0.11	0.115	0.092	0.086	0.071	0.062	0.084	0.083	0.104	0.0112658	0.00294912	0.0146156	-0.0241005	0.00560649	-0.0192951	0.012708	0.0181911	0.014264	0.00755247
5721.76	0.00045807	0.000201285	0.000812948	-0.000953406	0.000158221	-0.000720441	0.000272468	0.000704855	0.00053814	0.000208333	0.111	0.11	0.115	0.092	0.086	0.071	0.062	0.084	0.083	0.104	0.00950392	0.00421418	0.0162802	-0.0238662	0.00423701	-0.0233687	0.0101209	0.0193248	0.0149318	0.00461337
5723.69	0.000360562	0.000194326	0.000940904	-0.000829846	0.000118181	-0.000898138	0.000186667	0.000812814	0.000553518	0.000213325	0.111	0.11	0.115	0.092	0.086	0.071	0.062	0.084	0.083	0.104	0.00748085	0.00406848	0.0188426	-0.0207732	0.00316478	-0.0291326	0.00693378	0.0222847	0.0153585	0.00472392
5725.62	0.000254976	0.000184178	0.000976726	-0.000704825	0.000106648	-0.000958428	0.000124946	0.000855595	0.000555381	0.000339746	0.111	0.11	0.115	0.092	0.086	0.071	0.062	0.084	0.083	0.104	0.00529018	0.00385602	0.01956	-0.0176436	0.00285593	-0.0310882	0.00464114	0.0234576	0.0154101	0.00752341
5727.55	0.000216118	0.000209332	0.000889093	-0.000750363	6.22273e-05	-0.000857666	9.32068e-05	0.0008353	0.000535637	0.000441238	0.111	0.11	0.115	0.092	0.086	0.071	0.062	0.084	0.083	0.104	0.00448396	0.00438265	0.0178051	-0.0187835	0.00166639	-0.0278198	0.00346218	0.0229011	0.0148623	0.00977088
5729.48	0.000264342	0.000264943	0.000794366	-0.000948608	-1.83582e-05	-0.000803232	9.6336e-05	0.000762314	0.000463307	0.000345275	0.111	0.11	0.115	0.092	0.086	0.071	0.062	0.084	0.083	0.104	0.0054845	0.00554694	0.015908	-0.0237461	-0.000491616	-0.0260541	0.00357842	0.0209001	0.0128554	0.00764585
5731.4	0.000253573	0.000375584	0.000664339	-0.00111	-7.55787e-05	-0.000910819	0.000101328	0.00069581	0.000384107	0.000149772	0.111	0.11	0.115	0.092	0.086	0.071	0.062	0.084	0.083	0.104	0.00526107	0.00786336	0.0133041	-0.0277862	-0.00202393	-0.0295439	0.00376384	0.0190768	0.0106578	0.00331659
5733.33	0.000222732	0.000482708	0.000500008	-0.00118	-0.000101045	-0.001	9.02414e-05	0.000740096	0.000361249	8.48025e-05	0.111	0.11	0.115	0.092	0.086	0.071	0.062	0.084	0.083	0.104	0.00462119	0.0101062	0.0100132	-0.0295385	-0.00270589	-0.0324366	0.00335203	0.020291	0.0100236	0.00187789
5735.26	0.000262417	0.000497326	0.000448033	-0.00116	-8.95262e-05	-0.000958502	0.000101864	0.000838354	0.000409871	9.7543e-05	0.111	0.11	0.115	0.092	0.086	0.071	0.062	0.084	0.083	0.104	0.00544456	0.0104122	0.00897235	-0.0290378	-0.00239743	-0.0310906	0.00378375	0.0229849	0.0113727	0.00216001
5737.19	0.000342544	0.000351414	0.000584006	-0.00107	-3.19183e-05	-0.000869453	0.000172377	0.00080812	0.000480264	0.000101477	0.111	0.11	0.115	0.092	0.086	0.071	0.062	0.084	0.083	0.104	0.00710702	0.00735733	0.0116954	-0.0267849	-0.000854742	-0.0282021	0.00640297	0.022156	0.0133259	0.00224713
5739.12	0.000372694	0.000145957	0.000730663	-0.000977755	3.18289e-05	-0.000823736	0.000291839	0.00074549	0.000472575	0.000115022	0.111	0.11	0.115	0.092	0.086	0.071	0.062	0.084	0.083	0.104	0.00773256	0.00305581	0.0146323	-0.0244758	0.000852348	-0.0267192	0.0108404	0.0204389	0.0131125	0.00254707
5741.05	0.000350197	9.02861e-05	0.00071153	-0.00094825	7.97361e-05	-0.000834629	0.000331789	0.000838503	0.000377208	8.21203e-05	0.111	0.11	0.115	0.092	0.086	0.071	0.062	0.084	0.083	0.104	0.0072658	0.00189026	0.0142492	-0.0237372	0.00213526	-0.0270725	0.0123244	0.022989	0.0104664	0.00181849
5742.97	0.000306183	0.000170514	0.000663757	-0.00101	9.69768e-05	-0.000887871	0.000249043	0.000972047	0.000311866	1.79708e-05	0.111	0.11	0.115	0.092	0.086	0.071	0.062	0.084	0.083	0.104	0.00635261	0.00356994	0.0132925	-0.0252829	0.00259695	-0.0287995	0.00925074	0.0266503	0.00865334	0.00039795
5744.9	0.000261245	0.000185147	0.000700802	-0.0011	0.00010407	-0.000874132	0.000107616	0.00101	0.000332043	3.70741e-05	0.111	0.11	0.115	0.092	0.086	0.071	0.062	0.084	0.083	0.104	0.00542025	0.0038763	0.0140343	-0.0275359	0.0027869	-0.0283539	0.00399741	0.0276908	0.00921319	0.000820977
5746.83	0.000263961	0.000144169	0.000777796	-0.0011	0.000127941	-0.000819266	-4.91738e-05	0.000946894	0.000385538	0.000143275	0.111	0.11	0.115	0.092	0.086	0.071	0.062	0.084	0.083	0.104	0.0054766	0.00301837	0.0155762	-0.0275359	0.00342614	-0.0265742	-0.00182657	0.0259607	0.0106975	0.00317271
5748.76	0.000266544	0.00019291	0.000832126	-0.000981718	0.000102013	-0.000801355	-0.000116333	0.000897363	0.000436202	0.000236824	0.111	0.11	0.115	0.092	0.086	0.071	0.062	0.084	0.083	0.104	0.00553019	0.00403883	0.0166642	-0.024575	0.00273181	-0.0259932	-0.00432121	0.0246027	0.0121033	0.00524429
5750.69	0.000185634	0.000327185	0.000826359	-0.000904024	1.73747e-05	-0.0008066	-6.29127e-05	0.000963986	0.000478387	0.000310555	0.111	0.11	0.115	0.092	0.086	0.071	0.062	0.084	0.083	0.104	0.00385149	0.00685006	0.0165487	-0.0226301	0.000465278	-0.0261634	-0.0023369	0.0264293	0.0132738	0.006877
5752.62	0.00011888	0.000434533	0.000787139	-0.00101	-5.35399e-05	-0.00080508	5.0813e-06	0.00106	0.000445381	0.000336513	0.111	0.11	0.115	0.092	0.086	0.071	0.062	0.084	0.083	0.104	0.00246649	0.00909754	0.0157633	-0.0252829	-0.00143375	-0.0261141	0.000188746	0.0290617	0.012358	0.00745182
5754.55	0.000208262	0.000422537	0.000785798	-0.00116	-6.80387e-05	-0.000868201	5.88745e-05	0.00107	0.000344053	0.000230908	0.111	0.11	0.115	0.092	0.086	0.071	0.062	0.084	0.083	0.104	0.00432097	0.00884639	0.0157365	-0.0290378	-0.00182201	-0.0281615	0.0021869	0.0293358	0.00954643	0.00511328
5756.47	0.000332736	0.000312895	0.000861198	-0.00121	-3.16799e-05	-0.000975594	0.000112116	0.00104	0.000278652	8.80361e-05	0.111	0.11	0.115	0.092	0.086	0.071	0.062	0.084	0.083	0.104	0.00690352	0.00655088	0.0172464	-0.0302895	-0.000848358	-0.031645	0.00416457	0.0285133	0.00773175	0.00194949
5758.4	0.000372019	0.000188142	0.000960261	-0.00116	2.639e-05	-0.00102	0.000152573	0.001	0.00029391	9.9495e-05	0.111	0.11	0.115	0.092	0.086	0.071	0.062	0.084	0.083	0.104	0.00771856	0.00393901	0.0192303	-0.0290378	0.0007067	-0.0330854	0.00566735	0.0274167	0.00815512	0.00220324
5760.33	0.000335217	8.16137e-05	0.000992015	-0.00109	2.10702e-05	-0.000941604	0.000168458	0.000993222	0.000374198	0.000252724	0.111	0.11	0.115	0.092	0.086	0.071	0.062	0.084	0.083	0.104	0.006955	0.00170869	0.0198662	-0.0272855	0.00056424	-0.0305425	0.0062574	0.0272308	0.0103829	0.00559638
5762.26	0.000307758	-2.2918e-05	0.000935927	-0.00102	-3.31849e-05	-0.000846535	0.00013788	0.00103	0.000480413	0.000382036	0.111	0.11	0.115	0.092	0.086	0.071	0.062	0.084	0.083	0.104	0.00638529	-0.00047982	0.018743	-0.0255333	-0.000888661	-0.0274587	0.00512157	0.0282392	0.01333	0.00845989
5764.19	0.000345999	-6.04838e-05	0.00081937	-0.000946522	-3.70443e-05	-0.000812948	6.76811e-05	0.00114	0.00051868	0.000341549	0.111	0.11	0.115	0.092	0.086	0.071	0.062	0.084	0.083	0.104	0.0071787	-0.00126631	0.0164088	-0.0236939	-0.000992012	-0.0263693	0.00251403	0.031255	0.0143918	0.00756334
5766.12	0.000433458	5.52386e-05	0.000705749	-0.0008699	-3.18885e-06	-0.00075981	-2.48998e-05	0.00128	0.000486478	0.00013423	0.111	0.11	0.115	0.092	0.086	0.071	0.062	0.084	0.083	0.104	0.00899328	0.0011565	0.0141334	-0.0217759	-8.53944e-05	-0.0246457	-0.000924907	0.0350933	0.0134983	0.00297242
5768.04	0.000509949	0.000228018	0.000652254	-0.000818014	-1.90288e-05	-0.000652417	-4.04566e-05	0.00141	0.000459403	6.00517e-06	0.111	0.11	0.115	0.092	0.086	0.071	0.062	0.084	0.083	0.104	0.0105803	0.00477387	0.0130621	-0.020477	-0.000509574	-0.0211622	-0.00150277	0.0386575	0.012747	0.00013298
5769.97	0.000550619	0.000323534	0.000718936	-0.000771463	-9.48161e-05	-0.000622481	6.49393e-05	0.00155	0.00041607	5.9694e-05	0.111	0.11	0.115	0.092	0.086	0.071	0.062	0.084	0.083	0.104	0.0114241	0.00677363	0.0143975	-0.0193117	-0.00253909	-0.0201912	0.00241218	0.0424958	0.0115447	0.00132188
5771.9	0.000547747	0.00035739	0.000851437	-0.000740975	-0.000150025	-0.000716776	0.000233129	0.00165	0.000338808	0.000154644	0.111	0.11	0.115	0.092	0.086	0.071	0.062	0.084	0.083	0.104	0.0113645	0.00748245	0.017051	-0.0185485	-0.00401753	-0.0232498	0.00865961	0.0452375	0.0094009	0.00342447
5773.83	0.000465288	0.000373483	0.000911742	-0.000774622	-0.000129044	-0.000813425	0.000324279	0.00164	0.000309408	0.000186428	0.111	0.11	0.115	0.092	0.086	0.071	0.062	0.084	0.083	0.104	0.00965368	0.00781938	0.0182586	-0.0193908	-0.00345568	-0.0263848	0.0120454	0.0449633	0.00858514	0.0041283
5775.76	0.000340777	0.000382334	0.000854433	-0.000843197	-0.000114173	-0.000813201	0.000327006	0.00156	0.000319555	0.000142753	0.111	0.11	0.115	0.092	0.086	0.071	0.062	0.084	0.083	0.104	0.00707036	0.00800468	0.0171109	-0.0211074	-0.00305745	-0.0263775	0.0121467	0.04277	0.00886669	0.00316116
5777.69	0.000271462	0.000301793	0.000771344	-0.000929385	-0.000106528	-0.000718802	0.000356451	0.00146	0.000378564	2.96682e-05	0.111	0.11	0.115	0.092	0.086	0.071	0.062	0.084	0.083	0.104	0.00563223	0.00631845	0.015447	-0.0232649	-0.00285272	-0.0233155	0.0132404	0.0400283	0.010504	0.000656979
5779.61	0.000272956	0.000178724	0.000765413	-0.00106	4.50015e-06	-0.000610977	0.000384808	0.00137	0.000474215	-6.4984e-05	0.111	0.11	0.115	0.092	0.086	0.071	0.062	0.084	0.083	0.104	0.00566322	0.00374183	0.0153282	-0.0265346	0.00012051	-0.019818	0.0142938	0.0375608	0.013158	-0.00143902
5781.54	0.000308753	0.000183657	0.000857383	-0.00116	0.000176907	-0.00062345	0.000345439	0.00136	0.000497177	-4.21405e-05	0.111	0.11	0.115	0.092	0.086	0.071	0.062	0.084	0.083	0.104	0.00640593	0.00384511	0.01717	-0.0290378	0.0047374	-0.0202226	0.0128314	0.0372867	0.0137952	-0.000933169
5783.47	0.000356559	0.000347942	0.00103	-0.00118	0.000250697	-0.000719741	0.000293285	0.00138	0.000386074	7.1466e-05	0.111	0.11	0.115	0.092	0.086	0.071	0.062	0.084	0.083	0.104	0.0073978	0.00728464	0.0206269	-0.0295385	0.00671343	-0.023346	0.0108941	0.037835	0.0107124	0.00158256
5785.4	0.000368008	0.000500947	0.00114	-0.0011	0.000192091	-0.000718623	0.00024043	0.00137	0.000235796	0.000186682	0.111	0.11	0.115	0.092	0.086	0.071	0.062	0.084	0.083	0.104	0.00763534	0.010488	0.0228297	-0.0275359	0.00514402	-0.0233097	0.00893081	0.0375608	0.00654263	0.00413393
5787.33	0.000326647	0.000509158	0.00108	-0.000950396	9.43243e-05	-0.000604495	0.000198796	0.00139	0.000209481	0.000299543	0.111	0.11	0.115	0.092	0.086	0.071	0.062	0.084	0.083	0.104	0.00677719	0.0106599	0.0216282	-0.0237909	0.00252592	-0.0196078	0.00738431	0.0381092	0.00581247	0.00663315
5789.26	0.000299813	0.000453398	0.000963479	-0.000822961	3.51518e-05	-0.000547409	0.000257716	0.00141	0.00032042	0.000397578	0.111	0.11	0.115	0.092	0.086	0.071	0.062	0.084	0.083	0.104	0.00622044	0.00949251	0.0192947	-0.0206009	0.000941333	-0.0177561	0.0095729	0.0386575	0.00889069	0.00880406
5791.19	0.000323554	0.000401929	0.000943035	-0.000720382	1.11163e-05	-0.000609174	0.000351295	0.00139	0.000479922	0.000426948	0.111	0.11	0.115	0.092	0.086	0.071	0.062	0.084	0.083	0.104	0.00671302	0.00841493	0.0188853	-0.018033	0.000297684	-0.0197595	0.0130489	0.0381092	0.0133164	0.00945444
5793.11	0.000377397	0.000393868	0.0009709	-0.000637859	-3.27677e-05	-0.000682548	0.000387192	0.00139	0.00060302	0.000392467	0.111	0.11	0.115	0.092	0.086	0.071	0.062	0.084	0.083	0.104	0.00783014	0.00824616	0.0194433	-0.0159673	-0.000877489	-0.0221395	0.0143823	0.0381092	0.016732	0.00869088
5795.04	0.000451445	0.000425473	0.00099954	-0.000681341	-8.72165e-05	-0.000708282	0.000333697	0.00145	0.000657022	0.000340819	0.111	0.11	0.115	0.092	0.086	0.071	0.062	0.084	0.083	0.104	0.00936647	0.00890786	0.0200169	-0.0170557	-0.00233558	-0.0229743	0.0123952	0.0397542	0.0182304	0.00754717
5796.97	0.000495884	0.000464916	0.00112	-0.000829399	-7.30306e-05	-0.00070253	0.000188276	0.00153	0.000593334	0.000241458	0.111	0.11	0.115	0.092	0.086	0.071	0.062	0.084	0.083	0.104	0.0102885	0.00973365	0.0224292	-0.020762	-0.00195569	-0.0227877	0.00699354	0.0419475	0.0164632	0.0053469
5798.9	0.000462881	0.000518605	0.00128	-0.00087437	-2.13087e-05	-0.000696883	5.02765e-05	0.0015	0.000450939	0.000133336	0.111	0.11	0.115	0.092	0.086	0.071	0.062	0.084	0.083	0.104	0.00960374	0.0108577	0.0256334	-0.0218878	-0.000570627	-0.0226045	0.00186753	0.041125	0.0125122	0.00295262
5800.83	0.000428017	0.000547767	0.00134	-0.000824153	-5.3674e-05	-0.000653878	6.85602e-05	0.0014	0.000346154	0.000145063	0.111	0.11	0.115	0.092	0.086	0.071	0.062	0.084	0.083	0.104	0.00888039	0.0114682	0.026835	-0.0206307	-0.00143734	-0.0212096	0.00254668	0.0383833	0.00960473	0.00321231
5802.76	0.000497685	0.000470445	0.00129	-0.000872999	-0.000177339	-0.000560194	0.000160992	0.00137	0.000373363	0.000293806	0.111	0.11	0.115	0.092	0.086	0.071	0.062	0.084	0.083	0.104	0.0103258	0.00984941	0.0258337	-0.0218534	-0.00474897	-0.0181708	0.00598007	0.0375608	0.0103597	0.00650611
5804.69	0.000603651	0.000334144	0.00122	-0.000998557	-0.000217214	-0.000522688	0.000155613	0.00142	0.000446305	0.000426769	0.111	0.11	0.115	0.092	0.086	0.071	0.062	0.084	0.083	0.104	0.0125244	0.00699576	0.0244318	-0.0249965	-0.00581679	-0.0169542	0.00578027	0.0389317	0.0123836	0.00945047
5806.61	0.000580796	0.000276357	0.00116	-0.00108	-0.000105783	-0.000568509	0.000120625	0.00147	0.000421509	0.000416562	0.111	0.11	0.115	0.092	0.086	0.071	0.062	0.084	0.083	0.104	0.0120502	0.00578591	0.0232303	-0.0270352	-0.00283277	-0.0184405	0.00448064	0.0403025	0.0116956	0.00922445
5808.54	0.000433785	0.000341654	0.00119	-0.00107	3.71337e-05	-0.000646159	0.000153601	0.00152	0.000327274	0.000267461	0.111	0.11	0.115	0.092	0.086	0.071	0.062	0.084	0.083	0.104	0.00900006	0.00715299	0.023831	-0.0267849	0.000994406	-0.0209592	0.00570553	0.0416733	0.00908087	0.00592272
5810.47	0.000373753	0.000514016	0.0013	-0.00103	0.000121489	-0.00071165	0.000235319	0.00157	0.000277698	0.000124767	0.111	0.11	0.115	0.092	0.086	0.071	0.062	0.084	0.083	0.104	0.00775453	0.0107616	0.0260339	-0.0257836	0.00325336	-0.0230835	0.00874096	0.0430442	0.00770528	0.00276287
5812.4	0.00046592	0.000644326	0.00141	-0.000986338	0.000158012	-0.000771448	0.00033468	0.00163	0.000264093	0.000138879	0.111	0.11	0.115	0.092	0.086	0.071	0.062	0.084	0.083	0.104	0.00966679	0.0134898	0.0282368	-0.0246906	0.00423141	-0.0250232	0.0124317	0.0446892	0.00732779	0.00307537
5814.33	0.000549057	0.000569627	0.00144	-0.00090754	0.000147581	-0.000781864	0.000380337	0.00166	0.000312895	0.000232667	0.111	0.11	0.115	0.092	0.086	0.071	0.062	0.084	0.083	0.104	0.0113917	0.0119259	0.0288376	-0.0227181	0.00395208	-0.025361	0.0141277	0.0455117	0.00868189	0.00515223
5816.26	0.000527783	0.000346512	0.00146	-0.000794351	8.10325e-05	-0.000701025	0.000380248	0.00166	0.00047031	0.000301197	0.111	0.11	0.115	0.092	0.086	0.071	0.062	0.084	0.083	0.104	0.0109503	0.0072547	0.0292381	-0.0198847	0.00216997	-0.0227389	0.0141244	0.0455117	0.0130497	0.00666978
5818.18	0.000484246	0.000248969	0.00146	-0.000742167	-1.52886e-05	-0.000559822	0.000371069	0.00163	0.000658691	0.000433475	0.111	0.11	0.115	0.092	0.086	0.071	0.062	0.084	0.083	0.104	0.010047	0.00521251	0.0292381	-0.0185784	-0.000409414	-0.0181587	0.0137834	0.0446892	0.0182767	0.00959897
5820.11	0.000438816	0.000340134	0.00149	-0.000781536	-3.29167e-05	-0.000453383	0.000359431	0.00163	0.000730038	0.00055556	0.111	0.11	0.115	0.092	0.086	0.071	0.062	0.084	0.083	0.104	0.00910444	0.00712117	0.0298389	-0.0195639	-0.000881479	-0.0147062	0.0133511	0.0446892	0.0202564	0.0123024
5822.04	0.00041249	0.000397026	0.00151	-0.000856936	0.00012295	-0.000455812	0.000365406	0.00163	0.000729486	0.000569701	0.111	0.11	0.115	0.092	0.086	0.071	0.062	0.084	0.083	0.104	0.00855824	0.00831228	0.0302394	-0.0214513	0.00329249	-0.014785	0.0135731	0.0446892	0.020241	0.0126156
5823.97	0.000485867	0.000320762	0.00149	-0.00091207	0.000310898	-0.000526309	0.000366822	0.00166	0.0007575	0.000490159	0.111	0.11	0.115	0.092	0.086	0.071	0.062	0.084	0.083	0.104	0.0100806	0.00671559	0.0298389	-0.0228315	0.00832556	-0.0170717	0.0136257	0.0455117	0.0210183	0.0108542
5825.9	0.000623499	0.000260726	0.00145	-0.000965834	0.000326008	-0.000488624	0.000377893	0.00182	0.000774667	0.000374734	0.111	0.11	0.115	0.092	0.086	0.071	0.062	0.084	0.083	0.104	0.0129362	0.00545865	0.0290378	-0.0241773	0.00873019	-0.0158493	0.0140369	0.0498983	0.0214947	0.0082982
5827.83	0.000671291	0.000325307	0.00148	-0.000917435	0.000230923	-0.000332206	0.000420809	0.00191	0.000712991	0.000350207	0.111	0.11	0.115	0.092	0.086	0.071	0.062	0.084	0.083	0.104	0.0139278	0.00681075	0.0296386	-0.0229658	0.0061839	-0.0107756	0.015631	0.0523658	0.0197834	0.00775506
5829.76	0.000655186	0.000475094	0.00157	-0.000758499	0.000168219	-0.00024876	0.000467107	0.00179	0.000625446	0.000420958	0.111	0.11	0.115	0.092	0.086	0.071	0.062	0.084	0.083	0.104	0.0135936	0.00994674	0.031441	-0.0189872	0.00450475	-0.00806893	0.0173508	0.0490758	0.0173542	0.00932179
5831.68	0.000716256	0.000614673	0.00157	-0.000718892	0.000188544	-0.000289053	0.000494003	0.00163	0.000608817	0.000446916	0.111	0.11	0.115	0.092	0.086	0.071	0.062	0.084	0.083	0.104	0.0148607	0.012869	0.031441	-0.0179957	0.00504903	-0.0093759	0.0183498	0.0446892	0.0168928	0.00989661
5833.61	0.00075627	0.000699148	0.00145	-0.000823826	0.000268728	-0.000347018	0.00051479	0.00159	0.000613615	0.000428543	0.111	0.11	0.115	0.092	0.086	0.071	0.062	0.084	0.083	0.104	0.0156909	0.0146376	0.0290378	-0.0206225	0.00719629	-0.0112561	0.019122	0.0435925	0.017026	0.00948976
5835.54	0.000643829	0.000729412	0.00127	-0.00080049	0.00029175	-0.000380486	0.00053072	0.00151	0.000510126	0.000429884	0.111	0.11	0.115	0.092	0.086	0.071	0.062	0.084	0.083	0.104	0.013358	0.0152712	0.0254331	-0.0200384	0.00781279	-0.0123417	0.0197137	0.0413992	0.0141545	0.00951945
5837.47	0.000551803	0.000703141	0.00115	-0.000624388	0.000224888	-0.000363916	0.000576899	0.00142	0.000445157	0.00042969	0.111	0.11	0.115	0.092	0.086	0.071	0.062	0.084	0.083	0.104	0.0114487	0.0147212	0.02303	-0.0156301	0.00602229	-0.0118042	0.021429	0.0389317	0.0123518	0.00951515
5839.4	0.00067665	0.000709712	0.0011	-0.00052765	0.000219896	-0.000326037	0.000657752	0.00146	0.000487045	0.000445262	0.111	0.11	0.115	0.092	0.086	0.071	0.062	0.084	0.083	0.104	0.014039	0.0148588	0.0220287	-0.0132085	0.00588861	-0.0105755	0.0244323	0.0400283	0.013514	0.00985998
5841.33	0.000864662	0.000827938	0.00116	-0.000576734	0.000315055	-0.000330269	0.000720903	0.00158	0.000476047	0.000459135	0.111	0.11	0.115	0.092	0.086	0.071	0.062	0.084	0.083	0.104	0.0179398	0.017334	0.0232303	-0.0144372	0.00843688	-0.0107128	0.0267781	0.0433183	0.0132089	0.0101672
5843.25	0.00091296	0.000929192	0.00125	-0.000706315	0.000426426	-0.000343978	0.000660509	0.00165	0.000448719	0.000404805	0.111	0.11	0.115	0.092	0.086	0.071	0.062	0.084	0.083	0.104	0.0189419	0.0194539	0.0250326	-0.0176809	0.0114193	-0.0111575	0.0245347	0.0452375	0.0124506	0.0089641
5845.18	0.000850975	0.000948608	0.00138	-0.000858456	0.000540823	-0.00033097	0.000503138	0.00162	0.000527754	0.000344709	0.111	0.11	0.115	0.092	0.086	0.071	0.062	0.084	0.083	0.104	0.0176558	0.0198604	0.027636	-0.0214894	0.0144827	-0.0107355	0.0186891	0.044415	0.0146436	0.00763332
5847.11	0.000764598	0.000920713	0.00152	-0.000983596	0.000627831	-0.000356004	0.000400826	0.00151	0.000598639	0.000410006	0.111	0.11	0.115	0.092	0.086	0.071	0.062	0.084	0.083	0.104	0.0158637	0.0192764	0.0304397	-0.024622	0.0168127	-0.0115476	0.0148887	0.0413992	0.0166104	0.00907927
5849.04	0.000747406	0.000814065	0.00151	-0.000950664	0.000609711	-0.000443026	0.00045915	0.00144	0.000597298	0.000548169	0.111	0.11	0.115	0.092	0.086	0.071	0.062	0.084	0.083	0.104	0.015507	0.0170436	0.0302394	-0.0237976	0.0163275	-0.0143703	0.0170552	0.03948	0.0165732	0.0121388
5850.97	0.000818861	0.000672802	0.00132	-0.00079909	0.000550687	-0.000484631	0.000604257	0.00146	0.000601783	0.000552133	0.111	0.11	0.115	0.092	0.086	0.071	0.062	0.084	0.083	0.104	0.0169895	0.014086	0.0264344	-0.0200033	0.0147469	-0.0157198	0.0224452	0.0400283	0.0166977	0.0122266
5852.9	0.000843854	0.000653446	0.00112	-0.000718743	0.000544354	-0.000390112	0.000678435	0.00144	0.000675663	0.000417426	0.111	0.11	0.115	0.092	0.086	0.071	0.062	0.084	0.083	0.104	0.0175081	0.0136808	0.0224292	-0.017992	0.0145773	-0.0126539	0.0252006	0.03948	0.0187476	0.00924358
5854.82	0.000715306	0.000719115	0.00106	-0.000733376	0.000540391	-0.00025633	0.000658587	0.00131	0.000778243	0.000371054	0.111	0.11	0.115	0.092	0.086	0.071	0.062	0.084	0.083	0.104	0.014841	0.0150557	0.0212277	-0.0183583	0.0144712	-0.00831448	0.0244633	0.0359158	0.0215939	0.00821671
5856.75	0.000581438	0.000700802	0.00109	-0.000763714	0.000474989	-0.000231177	0.000579193	0.00119	0.000839144	0.000444382	0.111	0.11	0.115	0.092	0.086	0.071	0.062	0.084	0.083	0.104	0.0120635	0.0146722	0.0218284	-0.0191178	0.0127198	-0.0074986	0.0215142	0.0326258	0.0232837	0.0098405
5858.68	0.000604449	0.000600949	0.00118	-0.000769764	0.000353098	-0.000272676	0.000501439	0.00116	0.00083153	0.000492364	0.111	0.11	0.115	0.092	0.086	0.071	0.062	0.084	0.083	0.104	0.012541	0.0125817	0.0236308	-0.0192692	0.00945564	-0.00884469	0.018626	0.0318033	0.0230725	0.010903
5860.61	0.000653314	0.000558242	0.00132	-0.000796229	0.000226766	-0.000302121	0.000438809	0.00119	0.000813708	0.000468686	0.111	0.11	0.115	0.092	0.086	0.071	0.062	0.084	0.083	0.104	0.0135548	0.0116876	0.0264344	-0.0199317	0.00607258	-0.00979978	0.0162996	0.0326258	0.0225779	0.0103787
5862.54	0.000616006	0.000637591	0.00138	-0.000872046	0.000151411	-0.000349551	0.000421479	0.00116	0.000803888	0.000429943	0.111	0.11	0.115	0.092	0.086	0.071	0.062	0.084	0.083	0.104	0.0127807	0.0133488	0.027636	-0.0218296	0.00405465	-0.0113383	0.0156559	0.0318033	0.0223055	0.00952076
5864.47	0.000592839	0.000696883	0.00124	-0.000988901	0.000170544	-0.000476107	0.000491485	0.00109	0.00076504	0.000420824	0.111	0.11	0.115	0.092	0.086	0.071	0.062	0.084	0.083	0.104	0.0123001	0.0145902	0.0248323	-0.0247548	0.00456701	-0.0154433	0.0182563	0.0298842	0.0212276	0.00931882
5866.4	0.000709727	0.000631332	0.00105	-0.00111	0.000284746	-0.000577211	0.00057739	0.00107	0.000688285	0.000457391	0.111	0.11	0.115	0.092	0.086	0.071	0.062	0.084	0.083	0.104	0.0147252	0.0132178	0.0210274	-0.0277862	0.00762523	-0.0187228	0.0214472	0.0293358	0.0190978	0.0101286
5868.32	0.0009103	0.000541657	0.00102	-0.00123	0.000381216	-0.000528961	0.000550479	0.00108	0.000608042	0.000566736	0.111	0.11	0.115	0.092	0.086	0.071	0.062	0.084	0.083	0.104	0.0188867	0.0113403	0.0204266	-0.0307901	0.0102086	-0.0171577	0.0204476	0.02961	0.0168713	0.0125499
5870.25	0.00106	0.000485048	0.00112	-0.00132	0.000392824	-0.000444949	0.000452727	0.00106	0.000547156	0.000663132	0.111	0.11	0.115	0.092	0.086	0.071	0.062	0.084	0.083	0.104	0.0219926	0.0101551	0.0224292	-0.033043	0.0105195	-0.0144326	0.0168166	0.0290617	0.0151819	0.0146845
5872.18	0.000996647	0.000425011	0.00117	-0.00127	0.000391737	-0.000405401	0.000438169	0.00104	0.000496104	0.000576585	0.111	0.11	0.115	0.092	0.086	0.071	0.062	0.084	0.083	0.104	0.0206782	0.00889818	0.0234305	-0.0317914	0.0104904	-0.0131498	0.0162759	0.0285133	0.0137654	0.012768
5874.11	0.000727282	0.000330687	0.00113	-0.00107	0.000379071	-0.000384003	0.000528544	0.0011	0.000418127	0.000337094	0.111	0.11	0.115	0.092	0.086	0.071	0.062	0.084	0.083	0.104	0.0150895	0.00692338	0.0226295	-0.0267849	0.0101512	-0.0124558	0.0196329	0.0301583	0.0116018	0.00746469
5876.04	0.000507821	0.000244275	0.00107	-0.000848413	0.000291958	-0.000459686	0.000575542	0.00122	0.000342339	0.000203505	0.111	0.11	0.115	0.092	0.086	0.071	0.062	0.084	0.083	0.104	0.0105361	0.00511423	0.0214279	-0.021238	0.00781836	-0.0149107	0.0213786	0.0334483	0.00949888	0.00450646
5877.97	0.000523755	0.000209853	0.000988662	-0.000815868	0.000169247	-0.000583038	0.000536621	0.00129	0.000293061	0.000293762	0.111	0.11	0.115	0.092	0.086	0.071	0.062	0.084	0.083	0.104	0.0108667	0.00439356	0.019799	-0.0204233	0.00453228	-0.0189118	0.0199329	0.0353675	0.00813156	0.00650513
5879.9	0.000663846	0.000233397	0.000916004	-0.000935704	0.000113785	-0.000566348	0.000484377	0.00124	0.00033024	0.000452384	0.111	0.11	0.115	0.092	0.086	0.071	0.062	0.084	0.083	0.104	0.0137733	0.00488648	0.018344	-0.0234231	0.00304706	-0.0183704	0.0179923	0.0339967	0.00916317	0.0100177
5881.82	0.000755178	0.000289053	0.00085038	-0.000950933	0.000136539	-0.000405893	0.000435203	0.00123	0.000451937	0.000456139	0.111	0.11	0.115	0.092	0.086	0.071	0.062	0.084	0.083	0.104	0.0156682	0.00605172	0.0170298	-0.0238043	0.00365639	-0.0131658	0.0161657	0.0337225	0.0125399	0.0101008
5883.75	0.000808796	0.000298023	0.00082323	-0.00088799	0.000122935	-0.000360996	0.000383586	0.00135	0.00057295	0.000349701	0.111	0.11	0.115	0.092	0.086	0.071	0.062	0.084	0.083	0.104	0.0167807	0.00623952	0.0164861	-0.0222287	0.00329208	-0.0117095	0.0142484	0.0370125	0.0158976	0.00774386
5885.68	0.000905256	0.000229269	0.000906587	-0.000959307	-9.83477e-06	-0.000489488	0.000339672	0.00147	0.000607967	0.000301242	0.111	0.11	0.115	0.092	0.086	0.071	0.062	0.084	0.083	0.104	0.018782	0.00480006	0.0181554	-0.024014	-0.000263366	-0.0158773	0.0126172	0.0403025	0.0168693	0.00667077
5887.61	0.00094147	0.000179917	0.00102	-0.0011	-0.000164628	-0.000549361	0.000349134	0.00142	0.000515491	0.000287831	0.111	0.11	0.115	0.092	0.086	0.071	0.062	0.084	0.083	0.104	0.0195334	0.00376681	0.0204266	-0.0275359	-0.00440858	-0.0178194	0.0129686	0.0389317	0.0143033	0.0063738
5889.54	0.000823472	0.000227287	0.00103	-0.00117	-0.000184581	-0.000505447	0.000452697	0.00133	0.000286818	0.000221848	0.111	0.11	0.115	0.092	0.086	0.071	0.062	0.084	0.083	0.104	0.0170852	0.00475856	0.0206269	-0.0292882	-0.00494291	-0.016395	0.0168155	0.0364642	0.00795834	0.00491265
5891.47	0.000685908	0.000279501	0.000984311	-0.00119	-4.51058e-05	-0.000464454	0.000547901	0.00136	9.57251e-05	0.000148341	0.111	0.11	0.115	0.092	0.086	0.071	0.062	0.084	0.083	0.104	0.014231	0.00585173	0.0197119	-0.0297888	-0.00120789	-0.0150653	0.0203519	0.0372867	0.00265608	0.0032849
5893.4	0.00067268	0.000246927	0.001	-0.00121	0.000139788	-0.000430211	0.000517532	0.00142	0.000129715	0.000166312	0.111	0.11	0.115	0.092	0.086	0.071	0.062	0.084	0.083	0.104	0.0139566	0.00516975	0.0200261	-0.0302895	0.00374339	-0.0139546	0.0192238	0.0389317	0.0035992	0.00368285
5895.32	0.000744896	0.000227541	0.00103	-0.00117	0.000241786	-0.000415981	0.000438109	0.00136	0.000296235	0.00028421	0.111	0.11	0.115	0.092	0.086	0.071	0.062	0.084	0.083	0.104	0.0154549	0.00476388	0.0206269	-0.0292882	0.0064748	-0.013493	0.0162736	0.0372867	0.00821963	0.00629361
5897.25	0.000767787	0.000297502	0.000953227	-0.00118	0.000242293	-0.000390813	0.000473321	0.00127	0.000421077	0.000312731	0.111	0.11	0.115	0.092	0.086	0.071	0.062	0.084	0.083	0.104	0.0159299	0.00622861	0.0190894	-0.0295385	0.00648838	-0.0126767	0.0175816	0.0348192	0.0116836	0.00692519
5899.18	0.000734159	0.000411376	0.000899822	-0.00129	0.00022462	-0.000301451	0.000583872	0.00127	0.000486165	0.000234067	0.111	0.11	0.115	0.092	0.086	0.071	0.062	0.084	0.083	0.104	0.0152321	0.00861272	0.0180199	-0.0322921	0.00601511	-0.00977805	0.021688	0.0348192	0.0134896	0.00518323
5901.11	0.000732644	0.000542521	0.000963062	-0.00137	0.000280693	-0.000230581	0.000599712	0.00138	0.000562593	0.000284806	0.111	0.11	0.115	0.092	0.086	0.071	0.062	0.084	0.083	0.104	0.0152007	0.0113584	0.0192864	-0.0342947	0.0075167	-0.00747927	0.0222764	0.037835	0.0156103	0.00630681
5903.04	0.000797081	0.000620067	0.00106	-0.00127	0.000359893	-0.000197098	0.000533074	0.00144	0.000598818	0.000483811	0.111	0.11	0.115	0.092	0.086	0.071	0.062	0.084	0.083	0.104	0.0165376	0.0129819	0.0212277	-0.0317914	0.0096376	-0.00639319	0.0198011	0.03948	0.0166154	0.0107136
5904.97	0.000896684	0.000545785	0.00106	-0.00114	0.000342622	-0.000183016	0.000515491	0.00144	0.00059782	0.00055711	0.111	0.11	0.115	0.092	0.086	0.071	0.062	0.084	0.083	0.104	0.0186042	0.0114268	0.0212277	-0.0285372	0.0091751	-0.00593642	0.019148	0.03948	0.0165877	0.0123368
5906.89	0.000949646	0.000364244	0.000999778	-0.00105	0.000230923	-0.000220686	0.000556856	0.00145	0.000617921	0.000476211	0.111	0.11	0.115	0.092	0.086	0.071	0.062	0.084	0.083	0.104	0.019703	0.00762594	0.0200216	-0.0262842	0.0061839	-0.00715831	0.0206845	0.0397542	0.0171454	0.0105453
5908.82	0.000923499	0.0002639	0.000988752	-0.000980228	0.000150234	-0.00024496	0.000543624	0.00141	0.00058572	0.00042288	0.111	0.11	0.115	0.092	0.086	0.071	0.062	0.084	0.083	0.104	0.0191605	0.00552511	0.0198008	-0.0245377	0.00402313	-0.00794567	0.020193	0.0386575	0.016252	0.00936435
5910.75	0.000920836	0.000319496	0.00108	-0.000910133	0.00014244	-0.000228792	0.000479147	0.00133	0.000415862	0.000501096	0.111	0.11	0.115	0.092	0.086	0.071	0.062	0.084	0.083	0.104	0.0191053	0.00668908	0.0216282	-0.022783	0.00381441	-0.00742124	0.017798	0.0364642	0.0115389	0.0110964
5912.68	0.00105	0.000438809	0.0012	-0.000866443	0.000130802	-0.000226528	0.00052619	0.00134	0.000268087	0.000592977	0.111	0.11	0.115	0.092	0.086	0.071	0.062	0.084	0.083	0.104	0.0217851	0.00918706	0.0240313	-0.0216893	0.00350276	-0.0073478	0.0195454	0.0367383	0.00743861	0.013131
5914.61	0.00117	0.000484779	0.00124	-0.000878274	0.000152409	-0.000239179	0.000684351	0.00142	0.000295147	0.000561655	0.111	0.11	0.115	0.092	0.086	0.071	0.062	0.084	0.083	0.104	0.0242749	0.0101495	0.0248323	-0.0219855	0.00408137	-0.00775816	0.0254203	0.0389317	0.00818944	0.0124374
5916.54	0.00112	0.000457495	0.00123	-0.000892937	0.000201315	-0.000279814	0.000761554	0.00149	0.000405267	0.000434101	0.111	0.11	0.115	0.092	0.086	0.071	0.062	0.084	0.083	0.104	0.0232375	0.00957828	0.0246321	-0.0223525	0.00539103	-0.00907622	0.028288	0.0408508	0.0112449	0.00961283
5918.46	0.00103	0.000479147	0.0012	-0.000877052	0.000220329	-0.000277102	0.000746802	0.00148	0.000455752	0.000360087	0.111	0.11	0.115	0.092	0.086	0.071	0.062	0.084	0.083	0.104	0.0213702	0.0100316	0.0240313	-0.0219549	0.00590021	-0.00898825	0.0277401	0.0405767	0.0126457	0.00797385
5920.39	0.00109	0.000565961	0.00103	-0.000844538	0.000279576	-0.000190407	0.00079219	0.00138	0.000424683	0.000397101	0.111	0.11	0.115	0.092	0.086	0.071	0.062	0.084	0.083	0.104	0.022615	0.0118492	0.0206269	-0.021141	0.00748679	-0.00617616	0.029426	0.037835	0.0117837	0.0087935
5922.32	0.00123	0.000564977	0.000872761	-0.000855833	0.000419065	-0.000159815	0.000862688	0.00128	0.000395268	0.000483006	0.111	0.11	0.115	0.092	0.086	0.071	0.062	0.084	0.083	0.104	0.0255197	0.0118286	0.017478	-0.0214237	0.0112222	-0.00518386	0.0320447	0.0350933	0.0109675	0.0106958
5924.25	0.00132	0.000460684	0.0008699	-0.000923157	0.000523239	-0.000275537	0.000837624	0.00121	0.000461951	0.000519306	0.111	0.11	0.115	0.092	0.086	0.071	0.062	0.084	0.083	0.104	0.027387	0.00964505	0.0174207	-0.023109	0.0140119	-0.00893749	0.0311137	0.0331742	0.0128177	0.0114996
5926.18	0.00128	0.000378996	0.000959516	-0.000977755	0.000528246	-0.000349402	0.00077109	0.00116	0.000549525	0.000448361	0.111	0.11	0.115	0.092	0.086	0.071	0.062	0.084	0.083	0.104	0.0265571	0.0079348	0.0192154	-0.0244758	0.0141459	-0.0113334	0.0286423	0.0318033	0.0152477	0.00992861
5928.11	0.00112	0.000283554	0.00102	-0.000969946	0.000503629	-0.000277862	0.000765562	0.00109	0.000592753	0.000343427	0.111	0.11	0.115	0.092	0.086	0.071	0.062	0.084	0.083	0.104	0.0232375	0.00593659	0.0204266	-0.0242803	0.0134867	-0.0090129	0.0284369	0.0298842	0.0164471	0.00760493
5930.03	0.000985979	0.000191629	0.00103	-0.000945538	0.000550777	-0.000177532	0.000702366	0.00105	0.000606671	0.000322074	0.111	0.11	0.115	0.092	0.086	0.071	0.062	0.084	0.083	0.104	0.0204568	0.00401201	0.0206269	-0.0236693	0.0147493	-0.00575854	0.0260895	0.0287875	0.0168333	0.00713208
5931.96	0.000940416	0.000237152	0.00105	-0.000958681	0.000616819	-0.000174806	0.000565767	0.00115	0.000600606	0.000283614	0.111	0.11	0.115	0.092	0.086	0.071	0.062	0.084	0.083	0.104	0.0195115	0.0049651	0.0210274	-0.0239983	0.0165178	-0.00567012	0.0210155	0.0315292	0.016665	0.00628041
5933.89	0.0009178	0.000380769	0.0011	-0.00103	0.000561595	-0.000286803	0.000474393	0.00124	0.000579447	0.000184983	0.111	0.11	0.115	0.092	0.086	0.071	0.062	0.084	0.083	0.104	0.0190423	0.00797192	0.0220287	-0.0257836	0.015039	-0.00930292	0.0176214	0.0339967	0.0160779	0.00409631
5935.82	0.000923824	0.00044851	0.00104	-0.0011	0.000386208	-0.000467777	0.000466362	0.00119	0.000502139	0.000191882	0.111	0.11	0.115	0.092	0.086	0.071	0.062	0.084	0.083	0.104	0.0191673	0.00939017	0.0208271	-0.0275359	0.0103423	-0.0151731	0.0173231	0.0326258	0.0139328	0.00424908
5937.75	0.000975162	0.000372067	0.00085789	-0.00112	0.00023663	-0.000576153	0.000418246	0.00113	0.000404462	0.000242814	0.111	0.11	0.115	0.092	0.086	0.071	0.062	0.084	0.083	0.104	0.0202324	0.00778973	0.0171802	-0.0280365	0.00633673	-0.0186885	0.0155358	0.0309808	0.0112226	0.00537693
5939.68	0.000988697	0.000174806	0.000694901	-0.00106	0.00014323	-0.000599191	0.00028865	0.00113	0.00037235	0.000228912	0.111	0.11	0.115	0.092	0.086	0.071	0.062	0.084	0.083	0.104	0.0205132	0.0036598	0.0139161	-0.0265346	0.00383557	-0.0194357	0.010722	0.0309808	0.0103316	0.00506908
5941.61	0.000915447	1.66446e-05	0.000649273	-0.000995785	9.86159e-05	-0.000634506	0.000231788	0.0011	0.000382602	0.000218302	0.111	0.11	0.115	0.092	0.086	0.071	0.062	0.084	0.083	0.104	0.0189935	0.000348477	0.0130024	-0.0249271	0.00264084	-0.0205812	0.0086098	0.0301583	0.0106161	0.00483413
5943.53	0.00080852	9.31323e-06	0.000709176	-0.00103	0.000125602	-0.000589758	0.000338808	0.00105	0.000394672	0.000263929	0.111	0.11	0.115	0.092	0.086	0.071	0.062	0.084	0.083	0.104	0.016775	0.000194985	0.014202	-0.0257836	0.0033635	-0.0191298	0.0125851	0.0287875	0.010951	0.0058445
5945.46	0.000753419	1.36197e-05	0.000803709	-0.00114	0.00013122	-0.00041008	0.000442967	0.000996962	0.000381723	0.000364318	0.111	0.11	0.115	0.092	0.086	0.071	0.062	0.084	0.083	0.104	0.0156317	0.000285147	0.0160951	-0.0285372	0.00351395	-0.0133016	0.0164541	0.0273334	0.0105917	0.00806754
5947.39	0.000757268	-6.42538e-05	0.000835866	-0.00115	5.15282e-05	-0.000343621	0.000389502	0.000871092	0.000343203	0.000470102	0.111	0.11	0.115	0.092	0.086	0.071	0.062	0.084	0.083	0.104	0.0157116	-0.00134524	0.0167391	-0.0287875	0.00137988	-0.0111459	0.0144681	0.0238824	0.00952285	0.01041
5949.32	0.000749718	-0.00010398	0.000839144	-0.00114	1.37091e-06	-0.000487208	0.000361025	0.000683501	0.000297248	0.000477567	0.111	0.11	0.115	0.092	0.086	0.071	0.062	0.084	0.083	0.104	0.015555	-0.00217696	0.0168048	-0.0285372	3.67117e-05	-0.0158034	0.0134103	0.0187393	0.00824774	0.0105754
5951.25	0.000665426	-8.13901e-05	0.000766158	-0.00125	6.41346e-05	-0.000626355	0.000388369	0.000482947	0.000252008	0.000269398	0.111	0.11	0.115	0.092	0.086	0.071	0.062	0.084	0.083	0.104	0.0138061	-0.00170401	0.0153431	-0.0312908	0.00171746	-0.0203168	0.014426	0.0132408	0.00699246	0.00596561
5953.18	0.000596705	-8.1256e-05	0.000577956	-0.0014	0.000182822	-0.000685737	0.000292838	0.000328779	0.000249937	3.54052e-05	0.111	0.11	0.115	0.092	0.086	0.071	0.062	0.084	0.083	0.104	0.0123803	-0.00170121	0.0115742	-0.0350457	0.0048958	-0.022243	0.0108775	0.00901402	0.006935	0.000784021
5955.1	0.000630669	-8.4728e-05	0.000411272	-0.0015	0.000230238	-0.000760779	0.000103369	0.000284329	0.000330687	5.42402e-06	0.111	0.11	0.115	0.092	0.086	0.071	0.062	0.084	0.083	0.104	0.013085	-0.0017739	0.00823617	-0.0375489	0.00616556	-0.0246771	0.00383966	0.00779535	0.00917557	0.000120111
5957.03	0.000620809	-3.0905e-05	0.000421733	-0.00158	0.000150964	-0.000904217	2.31564e-05	0.000292182	0.000401884	9.83477e-05	0.111	0.11	0.115	0.092	0.086	0.071	0.062	0.084	0.083	0.104	0.0128804	-0.000647038	0.00844566	-0.0395515	0.00404268	-0.0293297	0.000860148	0.00801066	0.0111511	0.00217783
5958.96	0.0005624	3.90261e-05	0.000539988	-0.00159	-4.36604e-06	-0.000998244	7.19875e-05	0.000238344	0.000343353	0.000199974	0.111	0.11	0.115	0.092	0.086	0.071	0.062	0.084	0.083	0.104	0.0116685	0.000817065	0.0108138	-0.0398018	-0.000116918	-0.0323797	0.00267399	0.0065346	0.00952701	0.00442827
5960.89	0.00058173	1.22935e-05	0.000573963	-0.00154	-0.000131652	-0.000954479	0.000112101	0.000149682	0.000207663	0.000272006	0.111	0.11	0.115	0.092	0.086	0.071	0.062	0.084	0.083	0.104	0.0120696	0.000257381	0.0114942	-0.0385502	-0.00352552	-0.0309601	0.00416401	0.00410378	0.00576202	0.00602336
5962.82	0.000638404	-6.03795e-05	0.000506908	-0.00154	-0.000256866	-0.000865862	0.000103712	0.000120908	0.000168085	0.000215009	0.111	0.11	0.115	0.092	0.086	0.071	0.062	0.084	0.083	0.104	0.0132454	-0.00126413	0.0101514	-0.0385502	-0.00687863	-0.0280856	0.0038524	0.00331489	0.00466385	0.00476121
5964.75	0.000648214	-3.99351e-06	0.000439853	-0.00156	-0.000321239	-0.000856474	0.000143856	0.000156879	0.000251293	9.82732e-05	0.111	0.11	0.115	0.092	0.086	0.071	0.062	0.084	0.083	0.104	0.013449	-8.36096e-05	0.00880853	-0.0390509	-0.00860248	-0.0277811	0.00534355	0.0043011	0.00697262	0.00217618
5966.68	0.000681626	0.000150129	0.000386059	-0.00149	-0.000168577	-0.000919357	0.000202701	0.00017035	0.000335723	8.68291e-05	0.111	0.11	0.115	0.092	0.086	0.071	0.062	0.084	0.083	0.104	0.0141422	0.00314316	0.00773125	-0.0372986	-0.00451434	-0.0298208	0.00752936	0.00467043	0.0093153	0.00192276
5968.6	0.000754541	0.000170797	0.000404686	-0.00138	9.98825e-05	-0.000947937	0.000221103	7.47293e-05	0.000319108	0.000134468	0.111	0.11	0.115	0.092	0.086	0.071	0.062	0.084	0.083	0.104	0.015655	0.00357587	0.00810428	-0.034545	0.00267476	-0.0307479	0.00821291	0.00204883	0.00885429	0.00297769
5970.53	0.000740076	5.30034e-05	0.000555515	-0.00137	0.000258178	-0.000887364	0.000259399	-6.44475e-05	0.000224099	5.57751e-05	0.111	0.11	0.115	0.092	0.086	0.071	0.062	0.084	0.083	0.104	0.0153549	0.0011097	0.0111248	-0.0342947	0.00691377	-0.0287831	0.00963542	-0.00176694	0.00621807	0.0012351
5972.46	0.000578969	-5.25266e-05	0.000742972	-0.00141	0.000299603	-0.00080809	0.000317573	-9.82881e-05	0.00023073	-6.21229e-05	0.111	0.11	0.115	0.092	0.086	0.071	0.062	0.084	0.083	0.104	0.0120123	-0.00109972	0.0148788	-0.035296	0.00802309	-0.0262117	0.0117963	-0.00269473	0.00640206	-0.00137566
5974.39	0.000423285	-0.000133768	0.000775963	-0.00133	0.000278473	-0.00079979	0.000333354	-1.83284e-06	0.0004237	-1.42455e-05	0.111	0.11	0.115	0.092	0.086	0.071	0.062	0.084	0.083	0.104	0.00878221	-0.00280062	0.0155395	-0.0332934	0.00745725	-0.0259425	0.0123825	-5.02504e-05	0.0117564	-0.000315456
5976.32	0.000382147	-0.000285178	0.000686556	-0.00116	0.000157103	-0.000819057	0.00029479	5.72056e-05	0.000582546	0.000166476	0.111	0.11	0.115	0.092	0.086	0.071	0.062	0.084	0.083	0.104	0.00792869	-0.00597059	0.013749	-0.0290378	0.00420707	-0.0265674	0.01095	0.00156839	0.0161639	0.00368648
5978.25	0.000343692	-0.000391722	0.000613123	-0.0011	5.30332e-05	-0.000813514	0.000200793	-7.69198e-05	0.000601068	0.000295013	0.111	0.11	0.115	0.092	0.086	0.071	0.062	0.084	0.083	0.104	0.00713083	-0.00820123	0.0122785	-0.0275359	0.00142018	-0.0263876	0.00745849	-0.00210888	0.0166778	0.00653284
5980.18	0.000328244	-0.000320599	0.000579	-0.0012	4.86821e-05	-0.000858337	0.000128016	-0.000264153	0.000563845	0.000288218	0.111	0.11	0.115	0.092	0.086	0.071	0.062	0.084	0.083	0.104	0.00681032	-0.00671218	0.0115951	-0.0300391	0.00130366	-0.0278416	0.00475517	-0.00724219	0.015645	0.00638237
5982.1	0.000440364	-0.000160739	0.00050506	-0.00134	4.39137e-05	-0.000942364	0.00017482	-0.000273868	0.00051716	0.000258192	0.111	0.11	0.115	0.092	0.086	0.071	0.062	0.084	0.083	0.104	0.00913656	-0.00336529	0.0101144	-0.0335437	0.00117597	-0.0305671	0.00649372	-0.00750855	0.0143496	0.00571746
5984.03	0.000580021	-8.74847e-05	0.00038749	-0.00141	-7.52509e-06	-0.000921786	0.000246122	-0.000180394	0.000437468	0.000305936	0.111	0.11	0.115	0.092	0.086	0.071	0.062	0.084	0.083	0.104	0.0120341	-0.00183161	0.00775991	-0.035296	-0.000201515	-0.0298996	0.00914224	-0.0049458	0.0121384	0.00677472
5985.96	0.00065088	-0.000135884	0.000312895	-0.00139	-1.35601e-05	-0.000783369	0.000230327	-0.000106677	0.000331461	0.000368118	0.111	0.11	0.115	0.092	0.086	0.071	0.062	0.084	0.083	0.104	0.0135043	-0.00284492	0.00626606	-0.0347953	-0.000363127	-0.0254098	0.00855553	-0.00292473	0.00919704	0.00815169
5987.89	0.000613036	-0.000219435	0.000317335	-0.00138	7.0259e-05	-0.000716463	0.000218555	-4.06206e-05	0.00019443	0.000344247	0.111	0.11	0.115	0.092	0.086	0.071	0.062	0.084	0.083	0.104	0.0127191	-0.00459417	0.00635498	-0.034545	0.00188147	-0.0232396	0.00811826	-0.00111368	0.00539485	0.00762309
5989.82	0.000474012	-0.000286102	0.000281721	-0.00138	0.000185385	-0.000825405	0.000229225	-4.42565e-06	9.28938e-05	0.000201255	0.111	0.11	0.115	0.092	0.086	0.071	0.062	0.084	0.083	0.104	0.00983468	-0.00598994	0.00564177	-0.034545	0.00496444	-0.0267733	0.0085146	-0.000121337	0.00257752	0.00445664
5991.75	0.00035415	-0.000297338	0.000230312	-0.00137	0.000272378	-0.000974625	0.00016661	-3.12924e-06	0.000115275	3.50624e-05	0.111	0.11	0.115	0.092	0.086	0.071	0.062	0.084	0.083	0.104	0.00734781	-0.00622518	0.00461225	-0.0342947	0.00729403	-0.0316135	0.00618876	-8.57933e-05	0.00319853	0.00077643
5993.68	0.000407948	-0.0002698	0.00025478	-0.00141	0.000278845	-0.00107	0.000113234	3.71784e-05	0.000148058	-3.93838e-05	0.111	0.11	0.115	0.092	0.086	0.071	0.062	0.084	0.083	0.104	0.008464	-0.00564863	0.00510225	-0.035296	0.00746721	-0.0347072	0.0042061	0.00101931	0.00410816	-0.000872124
5995.6	0.000564847	-0.000256538	0.000277042	-0.00148	0.000142649	-0.00118	0.000231013	8.3074e-05	0.000114992	4.33624e-05	0.111	0.11	0.115	0.092	0.086	0.071	0.062	0.084	0.083	0.104	0.0117193	-0.00537097	0.00554807	-0.0370483	0.00382001	-0.0382752	0.00858102	0.00227761	0.00319068	0.000960227
5997.53	0.000672586	-0.000279397	0.000242114	-0.00145	-7.6741e-06	-0.00131	0.000398517	-2.28733e-05	0.000190675	0.000222951	0.111	0.11	0.115	0.092	0.086	0.071	0.062	0.084	0.083	0.104	0.0139546	-0.00584956	0.0048486	-0.0362973	-0.000205505	-0.042492	0.014803	-0.00062711	0.00529066	0.00493708
5999.46	0.000682856	-0.00028941	0.000263512	-0.00139	-5.58198e-05	-0.00135	0.000453293	-0.000245616	0.000435963	0.000316784	0.111	0.11	0.115	0.092	0.086	0.071	0.062	0.084	0.083	0.104	0.0141677	-0.00605919	0.00527711	-0.0347953	-0.0014948	-0.0437894	0.0168376	-0.00673397	0.0120967	0.00701494
6001.39	0.0006392	-0.000322446	0.000393957	-0.00148	-6.05434e-05	-0.00126	0.000399351	-0.000362322	0.000677899	0.000264645	0.111	0.11	0.115	0.092	0.086	0.071	0.062	0.084	0.083	0.104	0.013262	-0.00675085	0.00788942	-0.0370483	-0.0016213	-0.0408701	0.014834	-0.00993366	0.0188097	0.00586036
6003.32	0.000595232	-0.000451237	0.000534058	-0.00163	-1.42157e-05	-0.00108	0.000314042	-0.000362888	0.000719264	0.000202075	0.111	0.11	0.115	0.092	0.086	0.071	0.062	0.084	0.083	0.104	0.0123497	-0.00944726	0.0106951	-0.0408032	-0.000380683	-0.0350315	0.0116651	-0.00994918	0.0199574	0.0044748
6005.25	0.000547477	-0.00057976	0.000580192	-0.00164	7.89761e-05	-0.0008903	0.000260443	-0.000462428	0.000589415	0.000188097	0.111	0.11	0.115	0.092	0.086	0.071	0.062	0.084	0.083	0.104	0.0113589	-0.0121381	0.011619	-0.0410535	0.00211491	-0.0288783	0.0096742	-0.0126782	0.0163545	0.00416526
6007.17	0.000487086	-0.000570029	0.00053823	-0.00147	0.000167266	-0.000733957	0.000282824	-0.000592351	0.000483245	0.000157595	0.111	0.11	0.115	0.092	0.086	0.071	0.062	0.084	0.083	0.104	0.0101059	-0.0119343	0.0107786	-0.0367979	0.00447923	-0.0238071	0.0105055	-0.0162403	0.0134086	0.00348982
6009.1	0.000426622	-0.000451341	0.000500917	-0.00133	0.000193834	-0.00063318	0.00031668	-0.000593558	0.000446394	0.000143737	0.111	0.11	0.115	0.092	0.086	0.071	0.062	0.084	0.083	0.104	0.00885145	-0.00944944	0.0100314	-0.0332934	0.00519069	-0.0205382	0.0117631	-0.0162734	0.0123861	0.00318295
6011.03	0.000392801	-0.000255987	0.000545085	-0.00129	0.000120595	-0.000586912	0.00025475	-0.000501543	0.000392526	0.000184104	0.111	0.11	0.115	0.092	0.086	0.071	0.062	0.084	0.083	0.104	0.00814974	-0.00535944	0.0109159	-0.0322921	0.00322942	-0.0190374	0.00946273	-0.0137506	0.0108914	0.00407684
6012.96	0.000429282	-9.76473e-05	0.000551641	-0.00128	-2.95341e-05	-0.000687629	0.000120953	-0.000473261	0.000381947	0.000230983	0.111	0.11	0.115	0.092	0.086	0.071	0.062	0.084	0.083	0.104	0.00890663	-0.00204438	0.0110472	-0.0320417	-0.000790896	-0.0223044	0.00449282	-0.0129752	0.0105979	0.00511494
6014.89	0.000480859	-9.19998e-05	0.000383288	-0.00123	-0.000175491	-0.000938758	0.000105664	-0.000580147	0.00042139	0.000277832	0.111	0.11	0.115	0.092	0.086	0.071	0.062	0.084	0.083	0.104	0.00997674	-0.00192614	0.00767576	-0.0307901	-0.00469949	-0.0304501	0.00392491	-0.0159057	0.0116923	0.00615238
6016.82	0.00052363	-0.00017041	0.000176817	-0.00119	-0.000242949	-0.00114	0.000244528	-0.000610605	0.000442445	0.000360116	0.111	0.11	0.115	0.092	0.086	0.071	0.062	0.084	0.083	0.104	0.0108641	-0.00356777	0.00354095	-0.0297888	-0.00650595	-0.0369777	0.00908303	-0.0167408	0.0122765	0.00797449
6018.74	0.000556789	-0.000258371	0.00013268	-0.00123	-0.000188157	-0.00115	0.00029093	-0.000452086	0.000478193	0.000453815	0.111	0.11	0.115	0.092	0.086	0.071	0.062	0.084	0.083	0.104	0.0115521	-0.00540935	0.00265706	-0.0307901	-0.00503867	-0.0373021	0.0108066	-0.0123947	0.0132684	0.0100494
6020.67	0.000521492	-0.000324428	0.000247419	-0.00133	-4.76241e-05	-0.00107	0.000237167	-0.000230521	0.000523433	0.000567913	0.111	0.11	0.115	0.092	0.086	0.071	0.062	0.084	0.083	0.104	0.0108198	-0.00679234	0.00495483	-0.0332934	-0.00127533	-0.0347072	0.00880961	-0.00632012	0.0145237	0.012576
6022.6	0.000432252	-0.000294119	0.000415593	-0.00131	6.89626e-05	-0.000989512	0.000287294	-0.000116408	0.00057362	0.000621796	0.111	0.11	0.115	0.092	0.086	0.071	0.062	0.084	0.083	0.104	0.00896826	-0.00615778	0.0083227	-0.0327927	0.00184675	-0.0320964	0.0106716	-0.00319152	0.0159162	0.0137692
6024.53	0.000411067	-0.000186816	0.000559539	-0.00117	0.000108898	-0.000913858	0.000363603	-9.56804e-05	0.000601396	0.0005299	0.111	0.11	0.115	0.092	0.086	0.071	0.062	0.084	0.083	0.104	0.00852871	-0.00391125	0.0112054	-0.0292882	0.00291619	-0.0296425	0.0135061	-0.00262324	0.0166869	0.0117342
6026.46	0.000460469	-0.000119001	0.000551134	-0.00113	0.000143319	-0.000839546	0.000298426	-0.000139341	0.000550792	0.00038816	0.111	0.11	0.115	0.092	0.086	0.071	0.062	0.084	0.083	0.104	0.00955369	-0.00249145	0.0110371	-0.0282868	0.00383795	-0.027232	0.0110851	-0.00382027	0.0152828	0.0085955
6028.39	0.000531209	-0.000158355	0.000448614	-0.00117	0.000136837	-0.000853479	0.000243396	-0.000248462	0.000475481	0.000348061	0.111	0.11	0.115	0.092	0.086	0.071	0.062	0.084	0.083	0.104	0.0110214	-0.00331538	0.00898398	-0.0292882	0.00366437	-0.027684	0.00904098	-0.006812	0.0131932	0.00770754
6030.31	0.000622378	-0.000230014	0.000440121	-0.00123	2.51085e-05	-0.00101	0.000325918	-0.000340566	0.00044924	0.000282109	0.111	0.11	0.115	0.092	0.086	0.071	0.062	0.084	0.083	0.104	0.0129129	-0.00481566	0.0088139	-0.0307901	0.000672382	-0.032761	0.0121063	-0.00933718	0.0124651	0.00624709
6032.24	0.000726437	-0.00023596	0.000483423	-0.00135	-0.00010474	-0.00115	0.000386938	-0.000363529	0.000454456	0.000149339	0.111	0.11	0.115	0.092	0.086	0.071	0.062	0.084	0.083	0.104	0.0150719	-0.00494014	0.00968107	-0.033794	-0.00280484	-0.0373021	0.0143729	-0.00996675	0.0126098	0.003307
6034.17	0.0007417	-0.000252545	0.00050512	-0.00155	-0.000223175	-0.00116	0.000279263	-0.000408322	0.000498787	0.00011614	0.111	0.11	0.115	0.092	0.086	0.071	0.062	0.084	0.083	0.104	0.0153886	-0.00528737	0.0101156	-0.0388005	-0.00597642	-0.0376265	0.0103733	-0.0111948	0.0138398	0.00257183
6036.1	0.000642507	-0.000349358	0.00057435	-0.00167	-0.000277594	-0.00114	0.000102818	-0.000413105	0.000517264	0.000160158	0.111	0.11	0.115	0.092	0.086	0.071	0.062	0.084	0.083	0.104	0.0133306	-0.00731429	0.011502	-0.0418045	-0.00743371	-0.0369777	0.00381919	-0.011326	0.0143525	0.00354658
6038.03	0.000528934	-0.000370428	0.000695467	-0.00164	-0.000200644	-0.00124	1.31279e-05	-0.000355497	0.000372902	0.000152454	0.111	0.11	0.115	0.092	0.086	0.071	0.062	0.084	0.083	0.104	0.0109742	-0.00775542	0.0139275	-0.0410535	-0.00537306	-0.0402214	0.000487638	-0.00974654	0.0103469	0.00337598
6039.96	0.000486679	-0.000270963	0.000755429	-0.00153	-0.000108495	-0.00138	2.3514e-05	-0.000390515	0.000164077	0.0001522	0.111	0.11	0.115	0.092	0.086	0.071	0.062	0.084	0.083	0.104	0.0100975	-0.00567298	0.0151283	-0.0382999	-0.0029054	-0.0447625	0.000873431	-0.0107066	0.00455264	0.00337035
6041.89	0.000480946	-0.000236481	0.000646055	-0.00132	-0.00014618	-0.00137	7.91401e-05	-0.000501484	0.00017418	0.000178307	0.111	0.11	0.115	0.092	0.086	0.071	0.062	0.084	0.083	0.104	0.00997855	-0.00495105	0.012938	-0.033043	-0.00391456	-0.0444382	0.00293967	-0.013749	0.00483297	0.00394847
6043.81	0.000506177	-0.000285342	0.000446647	-0.00104	-0.000225321	-0.00114	0.000115797	-0.000503019	0.000403926	0.000221968	0.111	0.11	0.115	0.092	0.086	0.071	0.062	0.084	0.083	0.104	0.010502	-0.00597402	0.00894459	-0.0260339	-0.00603389	-0.0369777	0.0043013	-0.0137911	0.0112077	0.00491531
6045.74	0.000594843	-0.00032042	0.000340104	-0.000892848	-0.000266612	-0.000953704	0.000142276	-0.000414774	0.000528246	0.00030908	0.111	0.11	0.115	0.092	0.086	0.071	0.062	0.084	0.083	0.104	0.0123417	-0.00670843	0.00681095	-0.0223503	-0.00713962	-0.0309349	0.00528486	-0.0113717	0.0146572	0.00684434
6047.67	0.000695028	-0.000332817	0.000473887	-0.000988126	-0.000311255	-0.000945672	0.000225797	-0.000375658	0.000426069	0.000395268	0.111	0.11	0.115	0.092	0.086	0.071	0.062	0.084	0.083	0.104	0.0144203	-0.00696798	0.0094901	-0.0247354	-0.00833512	-0.0306744	0.00838727	-0.0102993	0.0118221	0.00875291
6049.6	0.000734878	-0.000301108	0.000739068	-0.00111	-0.000373363	-0.000947177	0.000357598	-0.000383079	0.000335947	0.000344366	0.111	0.11	0.115	0.092	0.086	0.071	0.062	0.084	0.083	0.104	0.0152471	-0.00630411	0.0148006	-0.0277862	-0.00999831	-0.0307232	0.013283	-0.0105027	0.00932152	0.00762572
6051.53	0.000736238	-0.000227451	0.000832528	-0.00114	-0.00037913	-0.000934646	0.000441283	-0.000365913	0.000458568	0.000251234	0.111	0.11	0.115	0.092	0.086	0.071	0.062	0.084	0.083	0.104	0.0152753	-0.004762	0.0166723	-0.0285372	-0.0101527	-0.0303168	0.0163915	-0.0100321	0.0127239	0.00556338
6053.46	0.00073718	-0.000214294	0.000712663	-0.00118	-0.000257835	-0.000966728	0.000443742	-0.000326723	0.000698224	0.000285864	0.111	0.11	0.115	0.092	0.086	0.071	0.062	0.084	0.083	0.104	0.0152948	-0.00448654	0.0142719	-0.0295385	-0.00690458	-0.0313574	0.0164829	-0.00895766	0.0193736	0.00633024
6055.39	0.00070774	-0.00022535	0.000562757	-0.00134	-4.12315e-05	-0.000996858	0.000370577	-0.000280052	0.000759304	0.000393063	0.111	0.11	0.115	0.092	0.086	0.071	0.062	0.084	0.083	0.104	0.014684	-0.00471801	0.0112698	-0.0335437	-0.00110414	-0.0323347	0.0137651	-0.00767809	0.0210684	0.00870408
6057.31	0.000586777	-0.00013724	0.000485688	-0.0014	0.000116393	-0.0011	0.000218838	-0.000310808	0.00061883	0.000454038	0.111	0.11	0.115	0.092	0.086	0.071	0.062	0.084	0.083	0.104	0.0121743	-0.00287331	0.00972643	-0.0350457	0.0031169	-0.0356803	0.00812877	-0.00852132	0.0171707	0.0100543
6059.24	0.000481653	3.43025e-05	0.000512838	-0.00123	0.000156656	-0.00118	0.000138372	-0.00042972	0.00053826	0.000472277	0.111	0.11	0.115	0.092	0.086	0.071	0.062	0.084	0.083	0.104	0.00999321	0.00071817	0.0102701	-0.0307901	0.0041951	-0.0382752	0.00513985	-0.0117815	0.0149351	0.0104582
6061.17	0.000599912	9.8452e-05	0.000611395	-0.0011	0.000126556	-0.00106	0.000224277	-0.000476137	0.000592008	0.00046052	0.111	0.11	0.115	0.092	0.086	0.071	0.062	0.084	0.083	0.104	0.0124468	0.00206123	0.0122438	-0.0275359	0.00338905	-0.0343828	0.00833081	-0.0130541	0.0164264	0.0101979
6063.1	0.000862833	-2.76864e-05	0.000683188	-0.00114	4.95613e-05	-0.000995651	0.000288129	-0.000364199	0.000565723	0.000417531	0.111	0.11	0.115	0.092	0.086	0.071	0.062	0.084	0.083	0.104	0.0179018	-0.000579653	0.0136816	-0.0285372	0.00132721	-0.0322956	0.0107026	-0.00998512	0.0156971	0.0092459
6065.03	0.000996873	-0.000171497	0.000682026	-0.0012	-5.56558e-05	-0.00118	0.000210628	-0.000277549	0.000459477	0.000340253	0.111	0.11	0.115	0.092	0.086	0.071	0.062	0.084	0.083	0.104	0.0206829	-0.00359052	0.0136583	-0.0300391	-0.00149041	-0.0382752	0.00782381	-0.00760947	0.0127491	0.00753464
6066.96	0.000957537	-0.000198498	0.000641167	-0.00118	-0.000130668	-0.00133	0.000222236	-0.000324756	0.000406071	0.00029923	0.111	0.11	0.115	0.092	0.086	0.071	0.062	0.084	0.083	0.104	0.0198667	-0.00415583	0.0128401	-0.0295385	-0.00349917	-0.0431407	0.00825499	-0.00890373	0.0112672	0.00662622
6068.89	0.000906117	-0.000190258	0.000590861	-0.00118	-0.000100002	-0.00119	0.000383273	-0.000325009	0.000440761	0.000367716	0.111	0.11	0.115	0.092	0.086	0.071	0.062	0.084	0.083	0.104	0.0187999	-0.00398331	0.0118326	-0.0295385	-0.00267796	-0.0385996	0.0142367	-0.00891066	0.0122298	0.00814279
6070.81	0.000889656	-0.00021854	0.000603676	-0.00121	4.81456e-05	-0.001	0.000491112	-0.000236303	0.000536889	0.000494257	0.111	0.11	0.115	0.092	0.086	0.071	0.062	0.084	0.083	0.104	0.0184584	-0.00457543	0.0120893	-0.0302895	0.00128929	-0.0324366	0.0182424	-0.00647864	0.0148971	0.0109449
6072.74	0.000834347	-0.000265181	0.000732988	-0.00121	0.000145301	-0.000964969	0.00049445	-0.000207603	0.000634074	0.000541225	0.111	0.11	0.115	0.092	0.086	0.071	0.062	0.084	0.083	0.104	0.0173108	-0.00555193	0.0146789	-0.0302895	0.00389103	-0.0313003	0.0183664	-0.00569178	0.0175936	0.011985
6074.67	0.000781452	-0.000214145	0.000869662	-0.00126	7.06464e-05	-0.00094521	0.000442386	-0.000298053	0.000648811	0.000457749	0.111	0.11	0.115	0.092	0.086	0.071	0.062	0.084	0.083	0.104	0.0162134	-0.00448342	0.0174159	-0.0315411	0.00189184	-0.0306594	0.0164325	-0.00817162	0.0180026	0.0101365
6076.6	0.00083571	-0.000140846	0.000841975	-0.00136	-4.04566e-05	-0.000942409	0.000284761	-0.000405133	0.000584558	0.000349522	0.111	0.11	0.115	0.092	0.086	0.071	0.062	0.084	0.083	0.104	0.0173391	-0.0029488	0.0168615	-0.0340443	-0.00108339	-0.0305686	0.0105775	-0.0111074	0.0162197	0.0077399
6078.53	0.000903515	-0.000258878	0.000687927	-0.00138	-2.76417e-05	-0.00105	7.89017e-05	-0.000450164	0.000491768	0.000329301	0.111	0.11	0.115	0.092	0.086	0.071	0.062	0.084	0.083	0.104	0.0187459	-0.00541996	0.0137765	-0.034545	-0.000740219	-0.0340585	0.00293082	-0.012342	0.0136451	0.00729212
6080.46	0.000837314	-0.000483885	0.000620842	-0.00132	4.43011e-05	-0.00116	-2.16067e-06	-0.00045237	0.000389039	0.000420898	0.111	0.11	0.115	0.092	0.086	0.071	0.062	0.084	0.083	0.104	0.0173724	-0.0101308	0.012433	-0.033043	0.00118634	-0.0376265	-8.02584e-05	-0.0124025	0.0107947	0.00932046
6082.38	0.000690675	-0.00053376	0.000652373	-0.00131	8.30293e-05	-0.00121	6.76364e-05	-0.000424534	0.000380829	0.000475258	0.111	0.11	0.115	0.092	0.086	0.071	0.062	0.084	0.083	0.104	0.01433	-0.011175	0.0130645	-0.0327927	0.00222345	-0.0392483	0.00251236	-0.0116393	0.0105669	0.0105242
6084.31	0.000641863	-0.00045985	0.000611663	-0.00137	9.14931e-05	-0.00126	0.000174671	-0.000366747	0.000459254	0.000383943	0.111	0.11	0.115	0.092	0.086	0.071	0.062	0.084	0.083	0.104	0.0133172	-0.00962759	0.0122492	-0.0342947	0.0024501	-0.0408701	0.00648818	-0.010055	0.0127429	0.00850212
6086.24	0.000640764	-0.000437707	0.000523299	-0.00146	2.24858e-05	-0.0013	0.000292257	-0.000274003	0.00044629	0.000250742	0.111	0.11	0.115	0.092	0.086	0.071	0.062	0.084	0.083	0.104	0.0132944	-0.00916399	0.0104796	-0.0365476	0.000602149	-0.0421676	0.0108559	-0.00751225	0.0123832	0.00555249
6088.17	0.000589643	-0.000436977	0.000517607	-0.00154	-5.92619e-05	-0.00132	0.000406846	-0.000159949	0.000373021	0.000150397	0.111	0.11	0.115	0.092	0.086	0.071	0.062	0.084	0.083	0.104	0.0122338	-0.00914871	0.0103656	-0.0385502	-0.00158698	-0.0428163	0.0151124	-0.00438527	0.0103502	0.00333043
6090.1	0.000572868	-0.00029704	0.000540376	-0.00151	-5.18262e-05	-0.00128	0.00046201	-0.000166208	0.000415102	6.03944e-05	0.111	0.11	0.115	0.092	0.086	0.071	0.062	0.084	0.083	0.104	0.0118857	-0.00621894	0.0108216	-0.0377992	-0.00138786	-0.0415189	0.0171614	-0.00455687	0.0115178	0.00133739
6092.03	0.000666168	-9.15229e-05	0.000466675	-0.00125	-5.36889e-05	-0.00114	0.000418037	-0.000313342	0.000551045	8.4728e-05	0.111	0.11	0.115	0.092	0.086	0.071	0.062	0.084	0.083	0.104	0.0138215	-0.00191616	0.00934567	-0.0312908	-0.00143774	-0.0369777	0.0155281	-0.00859079	0.0152898	0.00187624
6093.95	0.000824989	-2.35885e-05	0.000414997	-0.000987828	-0.000155017	-0.00102	0.000348181	-0.000387132	0.000615388	0.000239968	0.111	0.11	0.115	0.092	0.086	0.071	0.062	0.084	0.083	0.104	0.0171167	-0.000493857	0.00831077	-0.0247279	-0.00415121	-0.0330854	0.0129332	-0.0106139	0.0170752	0.00531391
6095.88	0.000966793	-7.6443e-05	0.000460654	-0.000923783	-0.000196397	-0.000954077	0.000308693	-0.00034681	0.000612885	0.000418723	0.111	0.11	0.115	0.092	0.086	0.071	0.062	0.084	0.083	0.104	0.0200588	-0.00160044	0.0092251	-0.0231247	-0.00525933	-0.030947	0.0114665	-0.00950837	0.0170057	0.0092723
6097.81	0.00101	-0.000165552	0.000475317	-0.00104	-7.07954e-05	-0.000958309	0.000310436	-0.000313997	0.00064759	0.000560299	0.111	0.11	0.115	0.092	0.086	0.071	0.062	0.084	0.083	0.104	0.0209552	-0.00346606	0.00951874	-0.0260339	-0.00189583	-0.0310843	0.0115312	-0.00860875	0.0179687	0.0124074
6099.74	0.000968662	-0.000246793	0.000505745	-0.00116	9.69768e-05	-0.00109	0.000345349	-0.000295967	0.000721946	0.000583932	0.111	0.11	0.115	0.092	0.086	0.071	0.062	0.084	0.083	0.104	0.0200976	-0.00516695	0.0101281	-0.0290378	0.00259695	-0.0353559	0.012828	-0.00811443	0.0200318	0.0129307
6101.67	0.00089127	-0.000293255	0.000707299	-0.00112	9.47416e-05	-0.00121	0.000410289	-0.000204444	0.000729322	0.00045827	0.111	0.11	0.115	0.092	0.086	0.071	0.062	0.084	0.083	0.104	0.0184918	-0.00613969	0.0141644	-0.0280365	0.00253709	-0.0392483	0.0152403	-0.00560517	0.0202365	0.010148
6103.6	0.000824026	-0.000312686	0.000914335	-0.00101	-6.94543e-05	-0.00124	0.000520021	-0.000109911	0.000626802	0.000381544	0.111	0.11	0.115	0.092	0.086	0.071	0.062	0.084	0.083	0.104	0.0170967	-0.00654651	0.0183106	-0.0252829	-0.00185992	-0.0402214	0.0193163	-0.00301339	0.0173919	0.008449
6105.53	0.000775467	-0.000273198	0.000897616	-0.00105	-0.000130907	-0.00129	0.000578493	-0.000143588	0.000564322	0.000492156	0.111	0.11	0.115	0.092	0.086	0.071	0.062	0.084	0.083	0.104	0.0160892	-0.00571977	0.0179757	-0.0262842	-0.00350557	-0.0418432	0.0214882	-0.0039367	0.0156582	0.0108984
6107.45	0.00073865	-0.000106931	0.000723243	-0.00119	-3.93987e-05	-0.0013	0.000523493	-0.000240952	0.000676483	0.000555888	0.111	0.11	0.115	0.092	0.086	0.071	0.062	0.084	0.083	0.104	0.0153253	-0.00223875	0.0144837	-0.0297888	-0.00105506	-0.0421676	0.0194452	-0.0066061	0.0187704	0.0123097
6109.38	0.000821654	8.21948e-05	0.000647485	-0.00123	-5.48363e-06	-0.00118	0.000503451	-0.000219494	0.000898585	0.00047031	0.111	0.11	0.115	0.092	0.086	0.071	0.062	0.084	0.083	0.104	0.0170475	0.00172086	0.0129666	-0.0307901	-0.000146847	-0.0382752	0.0187008	-0.00601779	0.024933	0.0104147
6111.31	0.00103	0.000159249	0.000737488	-0.00119	-6.88881e-05	-0.00106	0.000632092	-0.000118107	0.00102	0.000432238	0.111	0.11	0.115	0.092	0.086	0.071	0.062	0.084	0.083	0.104	0.0213702	0.00333409	0.014769	-0.0297888	-0.00184476	-0.0343828	0.0234792	-0.0032381	0.0283019	0.00957158
6113.24	0.0012	0.000172228	0.000777692	-0.0012	-3.95328e-05	-0.00117	0.000741288	-0.000163049	0.000993177	0.000577182	0.111	0.11	0.115	0.092	0.086	0.071	0.062	0.084	0.083	0.104	0.0248973	0.00360583	0.0155741	-0.0300391	-0.00105865	-0.0379508	0.0275353	-0.00447026	0.0275577	0.0127813
6115.17	0.0012	0.000114411	0.000732332	-0.00133	0.000121445	-0.00142	0.00069809	-0.000305206	0.000937656	0.000770986	0.111	0.11	0.115	0.092	0.086	0.071	0.062	0.084	0.083	0.104	0.0248973	0.00239535	0.0146657	-0.0332934	0.00325218	-0.04606	0.0259307	-0.00836773	0.0260171	0.0170729
6117.1	0.00109	-1.66893e-05	0.00066942	-0.00139	0.00025931	-0.00154	0.000608876	-0.000328273	0.000873089	0.00079745	0.111	0.11	0.115	0.092	0.086	0.071	0.062	0.084	0.083	0.104	0.022615	-0.000349413	0.0134059	-0.0347953	0.00694408	-0.0499524	0.0226168	-0.00900015	0.0242256	0.0176589
6119.02	0.000957632	-0.000115961	0.000536889	-0.00125	0.000247464	-0.00143	0.000507385	-0.000279933	0.000760764	0.000656918	0.111	0.11	0.115	0.092	0.086	0.071	0.062	0.084	0.083	0.104	0.0198687	-0.0024278	0.0107518	-0.0312908	0.00662686	-0.0463844	0.0188469	-0.00767483	0.0211089	0.0145469
6120.95	0.000861598	-0.000194565	0.000385732	-0.00108	0.000128448	-0.00127	0.000359371	-0.000262618	0.000732154	0.000544086	0.111	0.11	0.115	0.092	0.086	0.071	0.062	0.084	0.083	0.104	0.0178762	-0.00407348	0.0077247	-0.0270352	0.00343972	-0.0411945	0.0133489	-0.00720011	0.0203151	0.0120484
6122.88	0.000780107	-0.000296027	0.000290871	-0.00102	3.18438e-05	-0.00122	0.000294462	-0.0001733	0.000873759	0.000511408	0.111	0.11	0.115	0.092	0.086	0.071	0.062	0.084	0.083	0.104	0.0161855	-0.00619773	0.00582501	-0.0255333	0.000852747	-0.0395727	0.0109378	-0.00475131	0.0242442	0.0113247
6124.81	0.000847227	-0.000320852	0.000238895	-0.000936687	-2.0206e-05	-0.0012	0.00034979	7.7188e-06	0.00104	0.000523522	0.111	0.11	0.115	0.092	0.086	0.071	0.062	0.084	0.083	0.104	0.0175781	-0.00671747	0.00478413	-0.0234477	-0.000541098	-0.0389239	0.012993	0.000211624	0.0288569	0.011593
6126.74	0.00103	-0.000209048	0.00032109	-0.000750631	3.36766e-05	-0.00119	0.000393078	0.00011456	0.00114	0.000613779	0.111	0.11	0.115	0.092	0.086	0.071	0.062	0.084	0.083	0.104	0.0213702	-0.0043767	0.00643018	-0.0187903	0.000901828	-0.0385996	0.0146009	0.00314085	0.0316316	0.0135917
6128.67	0.00105	4.66406e-06	0.000526547	-0.000617415	0.000178799	-0.00119	0.000418261	9.87947e-05	0.00116	0.000726894	0.111	0.11	0.115	0.092	0.086	0.071	0.062	0.084	0.083	0.104	0.0217851	9.76485e-05	0.0105447	-0.0154555	0.00478807	-0.0385996	0.0155364	0.00270862	0.0321865	0.0160965
6130.6	0.000930252	0.000133857	0.000717401	-0.00059858	0.000275031	-0.00116	0.000504404	-5.66244e-07	0.00118	0.000806034	0.111	0.11	0.115	0.092	0.086	0.071	0.062	0.084	0.083	0.104	0.0193006	0.00280248	0.0143667	-0.014984	0.00736507	-0.0376265	0.0187362	-1.55245e-05	0.0327414	0.017849
6132.52	0.000943042	4.27812e-05	0.000860602	-0.000613958	0.000239238	-0.00117	0.000678763	-0.00012067	0.00128	0.000881553	0.111	0.11	0.115	0.092	0.086	0.071	0.062	0.084	0.083	0.104	0.019566	0.000895683	0.0172345	-0.015369	0.00640657	-0.0379508	0.0252128	-0.00330837	0.0355161	0.0195213
6134.45	0.000925374	-0.000172496	0.000870138	-0.000656456	0.000178605	-0.00127	0.000755146	-0.000241399	0.00138	0.000860483	0.111	0.11	0.115	0.092	0.086	0.071	0.062	0.084	0.083	0.104	0.0191994	-0.00361144	0.0174255	-0.0164328	0.00478288	-0.0411945	0.02805	-0.00661836	0.0382908	0.0190547
6136.38	0.000742391	-0.000393882	0.000734896	-0.000833929	0.000194073	-0.00133	0.000576451	-0.000315309	0.0014	0.000663012	0.111	0.11	0.115	0.092	0.086	0.071	0.062	0.084	0.083	0.104	0.0154029	-0.00824646	0.0147171	-0.0208754	0.00519709	-0.0431407	0.0214124	-0.00864472	0.0388458	0.0146819
6138.31	0.00073639	-0.000505984	0.000599623	-0.000976235	0.000236839	-0.00131	0.00032711	-0.000282973	0.00135	0.000471473	0.111	0.11	0.115	0.092	0.086	0.071	0.062	0.084	0.083	0.104	0.0152784	-0.0105935	0.0120081	-0.0244377	0.00634233	-0.042492	0.0121506	-0.00775818	0.0374584	0.0104404
6140.24	0.00102	-0.000422567	0.000443459	-0.000947475	0.000155151	-0.00131	0.000238046	-0.000240862	0.00115	0.000413492	0.111	0.11	0.115	0.092	0.086	0.071	0.062	0.084	0.083	0.104	0.0211627	-0.00884702	0.00888075	-0.0237178	0.0041548	-0.042492	0.00884226	-0.00660363	0.031909	0.00915646
6142.17	0.00122	-0.000230655	0.000311792	-0.000929952	5.55217e-05	-0.00137	0.000285149	-0.000225156	0.00085412	0.00044398	0.111	0.11	0.115	0.092	0.086	0.071	0.062	0.084	0.083	0.104	0.0253123	-0.00482908	0.00624397	-0.0232791	0.00148682	-0.0444382	0.0105919	-0.00617303	0.0236993	0.0098316
6144.1	0.00112	-0.000100419	0.000391483	-0.00107	5.81443e-05	-0.00152	0.000423193	-0.000157982	0.000685304	0.00052096	0.111	0.11	0.115	0.092	0.086	0.071	0.062	0.084	0.083	0.104	0.0232375	-0.00210241	0.00783987	-0.0267849	0.00155705	-0.0493037	0.0157196	-0.00433134	0.0190151	0.0115363
6146.02	0.000904086	-0.000140011	0.000616372	-0.00129	5.71012e-05	-0.00154	0.000584036	-6.01113e-05	0.000718236	0.000649035	0.111	0.11	0.115	0.092	0.086	0.071	0.062	0.084	0.083	0.104	0.0187577	-0.00293132	0.0123435	-0.0322921	0.00152912	-0.0499524	0.0216941	-0.00164805	0.0199289	0.0143724
6147.95	0.000788694	-0.000289112	0.000693113	-0.00143	-2.38419e-07	-0.00137	0.000638396	4.22597e-05	0.000825271	0.000765115	0.111	0.11	0.115	0.092	0.086	0.071	0.062	0.084	0.083	0.104	0.0163636	-0.00605295	0.0138803	-0.0357966	-6.38464e-06	-0.0444382	0.0237133	0.00115862	0.0228988	0.0169429
6149.88	0.000769668	-0.000327408	0.000612825	-0.00131	2.15471e-05	-0.0013	0.000620291	0.000150234	0.00089857	0.0007741	0.111	0.11	0.115	0.092	0.086	0.071	0.062	0.084	0.083	0.104	0.0159689	-0.00685473	0.0122725	-0.0327927	0.000577011	-0.0421676	0.0230408	0.00411892	0.0249326	0.0171418
6151.81	0.000792903	-0.000174448	0.000576109	-0.00101	0.000185117	-0.0014	0.000631094	0.000178367	0.000864357	0.000704661	0.111	0.11	0.115	0.092	0.086	0.071	0.062	0.084	0.083	0.104	0.016451	-0.00365231	0.0115372	-0.0252829	0.00495726	-0.0454113	0.0234421	0.00489023	0.0239833	0.0156042
6153.74	0.00091614	3.60608e-06	0.00067094	-0.000843137	0.000382394	-0.00144	0.000677258	7.78735e-05	0.000812158	0.000650272	0.111	0.11	0.115	0.092	0.086	0.071	0.062	0.084	0.083	0.104	0.0190078	7.54982e-05	0.0134363	-0.0211059	0.0102402	-0.0467087	0.0251569	0.00213503	0.0225349	0.0143998
6155.67	0.00105	0.00014545	0.000825971	-0.000945568	0.000462651	-0.00131	0.000667304	6.87242e-05	0.000887126	0.000736848	0.111	0.11	0.115	0.092	0.086	0.071	0.062	0.084	0.083	0.104	0.0217851	0.00304519	0.016541	-0.02367	0.0123894	-0.042492	0.0247871	0.00188419	0.0246151	0.0163169
6157.59	0.00103	0.000240684	0.000863999	-0.00103	0.00040932	-0.0012	0.000543326	0.00022921	0.00101	0.000934005	0.111	0.11	0.115	0.092	0.086	0.071	0.062	0.084	0.083	0.104	0.0213702	0.00503905	0.0173025	-0.0257836	0.0109612	-0.0389239	0.0201819	0.00628417	0.0280245	0.0206828
6159.52	0.000887315	0.000181943	0.000718236	-0.000936717	0.000346586	-0.00125	0.000404969	0.000321716	0.00101	0.00104	0.111	0.11	0.115	0.092	0.086	0.071	0.062	0.084	0.083	0.104	0.0184098	0.00380922	0.0143835	-0.0234485	0.00928125	-0.0405458	0.0150426	0.00882038	0.0280245	0.02303
6161.45	0.000784784	-1.39922e-05	0.000554681	-0.000812173	0.000367552	-0.00137	0.000363678	0.000289231	0.000874981	0.00101	0.111	0.11	0.115	0.092	0.086	0.071	0.062	0.084	0.083	0.104	0.0162825	-0.000292946	0.0111081	-0.0203308	0.0098427	-0.0444382	0.0135089	0.00792975	0.0242781	0.0223657
6163.38	0.00078209	-0.000256792	0.000572085	-0.000822335	0.000325635	-0.00139	0.000390843	0.000211328	0.0007727	0.000924572	0.111	0.11	0.115	0.092	0.086	0.071	0.062	0.084	0.083	0.104	0.0162266	-0.00537629	0.0114566	-0.0205852	0.0087202	-0.0450869	0.0145179	0.00579391	0.0214401	0.0204739
6165.31	0.000825201	-0.000488937	0.00067392	-0.000974357	0.000153542	-0.00137	0.000378221	4.32432e-05	0.000820443	0.000796974	0.111	0.11	0.115	0.092	0.086	0.071	0.062	0.084	0.083	0.104	0.0171211	-0.0102366	0.013496	-0.0243907	0.00411171	-0.0444382	0.0140491	0.00118558	0.0227648	0.0176484
6167.24	0.000823164	-0.000555992	0.000704855	-0.00112	0.000112042	-0.0014	0.000294209	-0.000117034	0.00104	0.000719428	0.111	0.11	0.115	0.092	0.086	0.071	0.062	0.084	0.083	0.104	0.0170788	-0.0116405	0.0141155	-0.0280365	0.00300038	-0.0454113	0.0109284	-0.00320868	0.0288569	0.0159312
6169.16	0.000747828	-0.000427514	0.000712424	-0.0011	0.000289187	-0.00148	0.000240982	-0.000129968	0.00119	0.000805765	0.111	0.11	0.115	0.092	0.086	0.071	0.062	0.084	0.083	0.104	0.0155157	-0.00895059	0.0142671	-0.0275359	0.00774416	-0.0480062	0.00895132	-0.00356329	0.0330189	0.017843
6171.09	0.000650108	-0.000281677	0.000795126	-0.00093928	0.000364885	-0.00149	0.00027132	-0.000122041	0.00112	0.000940323	0.111	0.11	0.115	0.092	0.086	0.071	0.062	0.084	0.083	0.104	0.0134883	-0.00589729	0.0159233	-0.0235126	0.00977128	-0.0483306	0.0100782	-0.00334596	0.0310766	0.0208227
6173.02	0.000674549	-0.000256538	0.00088951	-0.000798345	0.000200689	-0.00143	0.000286534	-0.000168383	0.00104	0.000948772	0.111	0.11	0.115	0.092	0.086	0.071	0.062	0.084	0.083	0.104	0.0139954	-0.00537097	0.0178134	-0.0199847	0.00537426	-0.0463844	0.0106434	-0.0046165	0.0288569	0.0210098
6174.95	0.000783033	-0.000291079	0.000866801	-0.000708103	3.20375e-06	-0.00142	0.000316113	-0.000121802	0.000980362	0.00083074	0.111	0.11	0.115	0.092	0.086	0.071	0.062	0.084	0.083	0.104	0.0162462	-0.00609414	0.0173586	-0.0177257	8.57934e-05	-0.04606	0.0117421	-0.0033394	0.0272021	0.0183961
6176.88	0.000822138	-0.000326708	0.000744253	-0.000667691	-2.99662e-05	-0.00144	0.000449047	3.38256e-05	0.00085777	0.000681832	0.111	0.11	0.115	0.092	0.086	0.071	0.062	0.084	0.083	0.104	0.0170575	-0.00684008	0.0149045	-0.016714	-0.000802467	-0.0467087	0.0166799	0.000927385	0.0238005	0.0150986
6178.81	0.000876887	-0.000355497	0.000628233	-0.000786096	6.27935e-05	-0.00141	0.000596747	0.000163406	0.000731111	0.000645936	0.111	0.11	0.115	0.092	0.086	0.071	0.062	0.084	0.083	0.104	0.0181934	-0.00744281	0.012581	-0.019678	0.00168155	-0.0457356	0.0221663	0.00448005	0.0202861	0.0143038
6180.74	0.000986935	-0.000304371	0.000606239	-0.00103	0.000180498	-0.00132	0.000546143	0.000291139	0.000637502	0.000695199	0.111	0.11	0.115	0.092	0.086	0.071	0.062	0.084	0.083	0.104	0.0204767	-0.00637242	0.0121406	-0.0257836	0.00483357	-0.0428163	0.0202866	0.00798206	0.0176888	0.0153946
6182.66	0.000983512	-0.000174418	0.000690162	-0.00118	0.000314847	-0.00123	0.000319943	0.000374675	0.000595346	0.000690013	0.111	0.11	0.115	0.092	0.086	0.071	0.062	0.084	0.083	0.104	0.0204057	-0.00365168	0.0138212	-0.0295385	0.00843131	-0.039897	0.0118843	0.0102723	0.0165191	0.0152798
6184.59	0.000871116	-6.66976e-05	0.000772923	-0.00107	0.000415355	-0.00123	0.000148803	0.000317305	0.000686288	0.000781283	0.111	0.11	0.115	0.092	0.086	0.071	0.062	0.084	0.083	0.104	0.0180737	-0.00139641	0.0154786	-0.0267849	0.0111228	-0.039897	0.00552731	0.00869945	0.0190424	0.0173009
6186.52	0.000794571	2.16663e-05	0.000757277	-0.00084129	0.000378549	-0.00126	0.000169784	0.000275314	0.000842318	0.00103	0.111	0.11	0.115	0.092	0.086	0.071	0.062	0.084	0.083	0.104	0.0164856	0.000453614	0.0151653	-0.0210597	0.0101372	-0.0408701	0.00630665	0.00754819	0.0233718	0.0228086
6188.45	0.0007409	7.61598e-05	0.000713527	-0.000734627	0.000250772	-0.00121	0.000286177	0.000360191	0.000938654	0.00112	0.111	0.11	0.115	0.092	0.086	0.071	0.062	0.084	0.083	0.104	0.015372	0.00159451	0.0142892	-0.0183896	0.00671544	-0.0392483	0.0106301	0.00987524	0.0260448	0.0248015
6190.38	0.000698212	0.000120744	0.000759125	-0.00076285	0.000174716	-0.00114	0.000407785	0.000423849	0.000956014	0.000950992	0.111	0.11	0.115	0.092	0.086	0.071	0.062	0.084	0.083	0.104	0.0144863	0.00252794	0.0152023	-0.0190961	0.00467873	-0.0369777	0.0151472	0.0116205	0.0265265	0.021059
6192.31	0.000585161	0.000104085	0.000775039	-0.000836641	0.000109553	-0.00111	0.000537217	0.000430107	0.000909343	0.000794977	0.111	0.11	0.115	0.092	0.086	0.071	0.062	0.084	0.083	0.104	0.0121408	0.00217916	0.015521	-0.0209433	0.00293373	-0.0360046	0.019955	0.0117921	0.0252315	0.0176042
6194.23	0.000400926	-4.32581e-05	0.000667065	-0.00099808	7.14511e-05	-0.00112	0.000605032	0.000377893	0.000851721	0.000770479	0.111	0.11	0.115	0.092	0.086	0.071	0.062	0.084	0.083	0.104	0.00831831	-0.000905667	0.0133587	-0.0249845	0.00191339	-0.036329	0.022474	0.0103606	0.0236327	0.0170617
6196.16	0.000398246	-0.000164032	0.000607967	-0.00118	0.000161901	-0.0012	0.000570983	0.000200361	0.000808343	0.000787899	0.111	0.11	0.115	0.092	0.086	0.071	0.062	0.084	0.083	0.104	0.00826271	-0.00343423	0.0121752	-0.0295385	0.00433556	-0.0389239	0.0212093	0.00549323	0.0224291	0.0174474
6198.09	0.000694798	-9.5889e-05	0.000678212	-0.00117	0.000322968	-0.00137	0.000558853	5.47767e-05	0.000795916	0.000794396	0.111	0.11	0.115	0.092	0.086	0.071	0.062	0.084	0.083	0.104	0.0144155	-0.00200757	0.0135819	-0.0292882	0.00864878	-0.0444382	0.0207587	0.00150179	0.0220843	0.0175913
6200.02	0.000977656	8.64118e-05	0.000776201	-0.000938505	0.000446096	-0.0015	0.000627294	0.000119805	0.00084801	0.000762507	0.111	0.11	0.115	0.092	0.086	0.071	0.062	0.084	0.083	0.104	0.0202842	0.00180915	0.0155443	-0.0234932	0.011946	-0.0486549	0.0233009	0.00328465	0.0235297	0.0168851
6201.95	0.000996524	0.000238255	0.000829875	-0.000678271	0.000495762	-0.0015	0.000650704	0.000286043	0.000900999	0.000711262	0.111	0.11	0.115	0.092	0.086	0.071	0.062	0.084	0.083	0.104	0.0206756	0.00498819	0.0166191	-0.0169789	0.013276	-0.0486549	0.0241705	0.00784235	0.025	0.0157503
6203.88	0.000846546	0.000320092	0.000807613	-0.000532657	0.000386953	-0.00134	0.000652015	0.000424117	0.000916019	0.000703469	0.111	0.11	0.115	0.092	0.086	0.071	0.062	0.084	0.083	0.104	0.0175639	0.00670156	0.0161733	-0.0133338	0.0103622	-0.0434651	0.0242192	0.0116279	0.0254168	0.0155778
6205.81	0.000694946	0.00033322	0.000711381	-0.000560313	0.000157639	-0.00106	0.000685394	0.000594944	0.000903979	0.00069201	0.111	0.11	0.115	0.092	0.086	0.071	0.062	0.084	0.083	0.104	0.0144186	0.00697642	0.0142462	-0.0140261	0.00422143	-0.0343828	0.0254591	0.0163114	0.0250827	0.015324
6207.73	0.00057273	0.000256017	0.000585496	-0.000722855	4.46588e-05	-0.000959829	0.000693157	0.000756174	0.000830919	0.000644401	0.111	0.11	0.115	0.092	0.086	0.071	0.062	0.084	0.083	0.104	0.0118829	0.00536007	0.0117252	-0.0180949	0.00119592	-0.0311336	0.0257474	0.0207318	0.0230555	0.0142698
6209.66	0.000496767	0.000173792	0.000499517	-0.000882328	0.00016807	-0.00105	0.000711575	0.000826001	0.000643402	0.00059779	0.111	0.11	0.115	0.092	0.086	0.071	0.062	0.084	0.083	0.104	0.0103068	0.00363857	0.0100034	-0.022087	0.00450076	-0.0340585	0.0264316	0.0226462	0.0178525	0.0132376
6211.59	0.000513131	0.00011608	0.0005759	-0.000929236	0.000349298	-0.00098817	0.000763431	0.000774622	0.000458643	0.000592008	0.111	0.11	0.115	0.092	0.086	0.071	0.062	0.084	0.083	0.104	0.0106463	0.00243029	0.011533	-0.0232612	0.00935388	-0.0320529	0.0283578	0.0212376	0.012726	0.0131096
6213.52	0.000549971	7.91401e-05	0.000817686	-0.000915706	0.000458658	-0.000821933	0.00068061	0.000601023	0.000427693	0.000578612	0.111	0.11	0.115	0.092	0.086	0.071	0.062	0.084	0.083	0.104	0.0114107	0.00165691	0.0163751	-0.0229225	0.0122824	-0.0266607	0.0252814	0.016478	0.0118672	0.0128129
6215.45	0.000593739	1.56909e-05	0.00108	-0.000932276	0.000452399	-0.000838295	0.000415817	0.00042069	0.00043565	0.000572994	0.111	0.11	0.115	0.092	0.086	0.071	0.062	0.084	0.083	0.104	0.0123187	0.00032851	0.0216282	-0.0233373	0.0121148	-0.0271915	0.0154456	0.0115339	0.012088	0.0126885
6217.38	0.00064223	-0.000145093	0.00113	-0.000947654	0.000224814	-0.000999168	0.000191331	0.000501066	0.00035286	0.000686705	0.111	0.11	0.115	0.092	0.086	0.071	0.062	0.084	0.083	0.104	0.0133248	-0.00303772	0.0226295	-0.0237223	0.00602031	-0.0324096	0.00710702	0.0137376	0.0097908	0.0152066
6219.31	0.000579097	-0.000249729	0.00101	-0.00084126	-0.00017339	-0.00123	0.000123113	0.000734091	0.000331178	0.000883356	0.111	0.11	0.115	0.092	0.086	0.071	0.062	0.084	0.083	0.104	0.012015	-0.00522842	0.0202263	-0.0210589	-0.00464322	-0.039897	0.00457305	0.0201263	0.00918919	0.0195612
6221.23	0.000418764	-0.000118211	0.00101	-0.000662774	-0.000342161	-0.00149	0.000188887	0.000794172	0.000512704	0.00107	0.111	0.11	0.115	0.092	0.086	0.071	0.062	0.084	0.083	0.104	0.00868841	-0.00247491	0.0202263	-0.016591	-0.00916275	-0.0483306	0.00701624	0.0217735	0.014226	0.0236943
6223.16	0.000304461	6.90073e-05	0.00113	-0.00053373	-4.47482e-05	-0.00156	0.000336811	0.000713617	0.000732228	0.00119	0.111	0.11	0.115	0.092	0.086	0.071	0.062	0.084	0.083	0.104	0.00631688	0.00144476	0.0226295	-0.0133607	-0.00119832	-0.0506011	0.0125109	0.019565	0.0203171	0.0263516
6225.09	0.00026666	5.82188e-05	0.00109	-0.00047496	0.000378802	-0.00144	0.000472814	0.000695497	0.00084132	0.00115	0.111	0.11	0.115	0.092	0.086	0.071	0.062	0.084	0.083	0.104	0.00553259	0.00121889	0.0218284	-0.0118895	0.010144	-0.0467087	0.0175628	0.0190682	0.0233441	0.0254659
6227.02	0.000296226	-2.01464e-05	0.000958115	-0.000454903	0.000579014	-0.00133	0.000514731	0.000754148	0.000913918	0.00102	0.111	0.11	0.115	0.092	0.086	0.071	0.062	0.084	0.083	0.104	0.00614602	-0.000421792	0.0191873	-0.0113874	0.0155055	-0.0431407	0.0191198	0.0206762	0.0253585	0.0225871
6228.95	0.000416453	2.03848e-05	0.000975579	-0.000478953	0.000578836	-0.0012	0.000559047	0.000782967	0.000929251	0.00105	0.111	0.11	0.115	0.092	0.086	0.071	0.062	0.084	0.083	0.104	0.00864046	0.000426784	0.019537	-0.0119894	0.0155007	-0.0389239	0.0207659	0.0214663	0.0257839	0.0232514
6230.88	0.000603794	0.000186369	0.00118	-0.000515252	0.000444025	-0.000949696	0.000673637	0.000714332	0.000796348	0.0012	0.111	0.11	0.115	0.092	0.086	0.071	0.062	0.084	0.083	0.104	0.0125274	0.00390189	0.0236308	-0.0128981	0.0118906	-0.0308049	0.0250224	0.0195846	0.0220963	0.0265731
6232.81	0.000734853	0.000312045	0.00131	-0.000453591	0.000336781	-0.000847354	0.000775978	0.000567228	0.000641048	0.00123	0.111	0.11	0.115	0.092	0.086	0.071	0.062	0.084	0.083	0.104	0.0152465	0.00653309	0.0262342	-0.0113546	0.00901868	-0.0274853	0.0288238	0.0155515	0.0177872	0.0272374
6234.73	0.000707064	0.000329047	0.00113	-0.000312269	0.000467315	-0.00109	0.000814155	0.000471652	0.000657439	0.00108	0.111	0.11	0.115	0.092	0.086	0.071	0.062	0.084	0.083	0.104	0.01467	0.00688905	0.0226295	-0.00781691	0.0125143	-0.0353559	0.0302419	0.0129311	0.018242	0.0239158
6236.66	0.000536078	0.000292867	0.000902653	-0.000256509	0.000639617	-0.00147	0.000831246	0.000553966	0.000754967	0.000916526	0.111	0.11	0.115	0.092	0.086	0.071	0.062	0.084	0.083	0.104	0.0111224	0.00613157	0.0180766	-0.00642109	0.0171283	-0.0476818	0.0308768	0.0151879	0.0209481	0.0202958
6238.59	0.000359548	0.000220478	0.000973344	-0.000298828	0.000549585	-0.00173	0.000853762	0.000718743	0.000681534	0.000827983	0.111	0.11	0.115	0.092	0.086	0.071	0.062	0.084	0.083	0.104	0.00745981	0.00461601	0.0194923	-0.00748044	0.0147174	-0.0561154	0.0317131	0.0197055	0.0189105	0.018335
6240.52	0.00031212	0.000132874	0.00115	-0.00032106	0.000465199	-0.0017	0.00090161	0.000805438	0.000522807	0.000866324	0.111	0.11	0.115	0.092	0.086	0.071	0.062	0.084	0.083	0.104	0.00647579	0.0027819	0.02303	-0.00803697	0.0124576	-0.0551423	0.0334904	0.0220824	0.0145063	0.0191841
6242.45	0.000433477	0.000190243	0.00108	-0.000274599	0.000598386	-0.00145	0.00093016	0.000778854	0.000511631	0.00088653	0.111	0.11	0.115	0.092	0.086	0.071	0.062	0.084	0.083	0.104	0.00899367	0.003983	0.0216282	-0.00687393	0.0160242	-0.0470331	0.0345509	0.0213536	0.0141962	0.0196315
6244.38	0.000595606	0.000310138	0.00083667	-0.000207394	0.000709966	-0.00129	0.000846371	0.000629932	0.000624269	0.000813574	0.111	0.11	0.115	0.092	0.086	0.071	0.062	0.084	0.083	0.104	0.0123575	0.00649316	0.0167552	-0.00519161	0.0190122	-0.0418432	0.0314386	0.0172706	0.0173216	0.018016
6246.3	0.000578161	0.000228822	0.000652283	-0.000187784	0.000598848	-0.00135	0.000761554	0.00042662	0.000628859	0.000783652	0.111	0.11	0.115	0.092	0.086	0.071	0.062	0.084	0.083	0.104	0.0119955	0.0047907	0.0130627	-0.00470072	0.0160366	-0.0437894	0.028288	0.0116965	0.0174489	0.0173534
6248.23	0.000457226	3.71784e-05	0.000681132	-0.000252753	0.000456393	-0.00134	0.000839055	0.000272095	0.00049004	0.000816539	0.111	0.11	0.115	0.092	0.086	0.071	0.062	0.084	0.083	0.104	0.00948641	0.000778381	0.0136404	-0.00632707	0.0122218	-0.0434651	0.0311668	0.00745994	0.0135971	0.0180816
6250.16	0.000541137	8.0511e-05	0.000913858	-0.000412166	0.000497595	-0.00107	0.000915453	0.000210434	0.000463813	0.000846118	0.111	0.11	0.115	0.092	0.086	0.071	0.062	0.084	0.083	0.104	0.0112274	0.00168561	0.018301	-0.0103176	0.0133251	-0.0347072	0.0340046	0.0057694	0.0128694	0.0187366
6252.09	0.000802477	0.000332653	0.00117	-0.000607669	0.00062564	-0.000725791	0.000804082	0.000219077	0.000591859	0.000922799	0.111	0.11	0.115	0.092	0.086	0.071	0.062	0.084	0.083	0.104	0.0166496	0.00696454	0.0234305	-0.0152115	0.0167541	-0.0235422	0.0298678	0.00600636	0.0164223	0.0204347
6254.02	0.00091348	0.000526249	0.00124	-0.000700235	0.000685334	-0.000634193	0.000590011	0.000195533	0.000631943	0.00108	0.111	0.11	0.115	0.092	0.086	0.071	0.062	0.084	0.083	0.104	0.0189527	0.0110177	0.0248323	-0.0175287	0.0183526	-0.0205711	0.0219161	0.00536086	0.0175345	0.0239158
6255.95	0.000728485	0.000532076	0.0011	-0.000673831	0.000670508	-0.000852972	0.000436306	8.29399e-05	0.000542328	0.00111	0.111	0.11	0.115	0.092	0.086	0.071	0.062	0.084	0.083	0.104	0.0151144	0.0111397	0.0220287	-0.0168677	0.0179556	-0.0276675	0.0162067	0.00227394	0.015048	0.0245801
6257.88	0.000448226	0.000388131	0.000968277	-0.000624061	0.000597402	-0.00105	0.000368848	-6.40452e-05	0.000566319	0.000876099	0.111	0.11	0.115	0.092	0.086	0.071	0.062	0.084	0.083	0.104	0.00929968	0.00812605	0.0193908	-0.0156219	0.0159979	-0.0340585	0.0137009	-0.00175591	0.0157136	0.0194005
6259.8	0.000352401	0.000247106	0.000973105	-0.000583053	0.000496	-0.00107	0.000323132	-7.39694e-05	0.000644788	0.000628859	0.111	0.11	0.115	0.092	0.086	0.071	0.062	0.084	0.083	0.104	0.00731153	0.0051735	0.0194875	-0.0145953	0.0132824	-0.0347072	0.0120028	-0.00202799	0.0178909	0.0139256
6261.73	0.000543185	0.00019227	0.00104	-0.000563711	0.00041002	-0.000985637	0.000377342	0.000108361	0.000612214	0.000674263	0.111	0.11	0.115	0.092	0.086	0.071	0.062	0.084	0.083	0.104	0.0112699	0.00402543	0.0208271	-0.0141112	0.01098	-0.0319707	0.0140164	0.0029709	0.0169871	0.014931
6263.66	0.00084121	0.000192836	0.00113	-0.000538886	0.000376821	-0.000828102	0.00059393	0.000345677	0.000652417	0.000955701	0.111	0.11	0.115	0.092	0.086	0.071	0.062	0.084	0.083	0.104	0.0174532	0.00403728	0.0226295	-0.0134897	0.0100909	-0.0268608	0.0220616	0.00947731	0.0181026	0.0211633
6265.59	0.000914199	0.000257447	0.00119	-0.000471354	0.000285864	-0.000834167	0.000846624	0.000481695	0.000774518	0.00118	0.111	0.11	0.115	0.092	0.086	0.071	0.062	0.084	0.083	0.104	0.0189676	0.00539	0.023831	-0.0117992	0.00765517	-0.0270576	0.031448	0.0132065	0.0214905	0.0261302
6267.52	0.000656592	0.000282541	0.00115	-0.000460386	0.000144973	-0.00112	0.000974044	0.000475794	0.000718683	0.00121	0.111	0.11	0.115	0.092	0.086	0.071	0.062	0.084	0.083	0.104	0.0136228	0.00591538	0.02303	-0.0115247	0.00388224	-0.036329	0.036181	0.0130447	0.0199413	0.0267945
6269.44	0.000303855	0.000169098	0.00106	-0.00057295	0.000120595	-0.00139	0.000911176	0.000372887	0.000613213	0.00113	0.111	0.11	0.115	0.092	0.086	0.071	0.062	0.084	0.083	0.104	0.00630431	0.0035403	0.0212277	-0.0143424	0.00322942	-0.0450869	0.0338458	0.0102233	0.0170148	0.025023
6271.37	4.83924e-05	8.38786e-05	0.000955761	-0.000668913	0.000224024	-0.00141	0.000724182	0.000278264	0.000684082	0.00105	0.111	0.11	0.115	0.092	0.086	0.071	0.062	0.084	0.083	0.104	0.00100403	0.00175611	0.0191402	-0.0167446	0.00599915	-0.0457356	0.0268999	0.00762907	0.0189812	0.0232514
6273.3	-5.02657e-05	0.000162512	0.000951558	-0.000617981	0.000297934	-0.00127	0.000560463	0.000260204	0.000804976	0.0011	0.111	0.11	0.115	0.092	0.086	0.071	0.062	0.084	0.083	0.104	-0.0010429	0.00340241	0.019056	-0.0154697	0.0079784	-0.0411945	0.0208185	0.00713393	0.0223357	0.0243587
6275.23	9.656e-06	0.000249729	0.00104	-0.000389755	0.00024581	-0.00115	0.000467941	0.000347078	0.000755802	0.00135	0.111	0.11	0.115	0.092	0.086	0.071	0.062	0.084	0.083	0.104	0.00020034	0.00522842	0.0208271	-0.00975658	0.00658256	-0.0373021	0.0173817	0.00951572	0.0209712	0.0298947
6277.16	0.000112016	0.000221699	0.00102	-0.00014931	0.000152782	-0.00104	0.000433743	0.00045526	0.000543788	0.00155	0.111	0.11	0.115	0.092	0.086	0.071	0.062	0.084	0.083	0.104	0.00232408	0.00464157	0.0204266	-0.00373762	0.00409136	-0.0337341	0.0161115	0.0124817	0.0150885	0.0343236
6279.09	0.000106595	0.0001636	0.000873208	-0.000108421	0.000108376	-0.000915945	0.000502288	0.00046736	0.000366479	0.00144	0.111	0.11	0.115	0.092	0.086	0.071	0.062	0.084	0.083	0.104	0.00221161	0.00342519	0.0174869	-0.00271406	0.00290221	-0.0297102	0.0186576	0.0128135	0.0101687	0.0318877
6281.02	8.54972e-05	0.000268027	0.000752032	-0.000191063	0.000141859	-0.000877678	0.000600502	0.000381559	0.000329509	0.00119	0.111	0.11	0.115	0.092	0.086	0.071	0.062	0.084	0.083	0.104	0.00177387	0.00561151	0.0150603	-0.00478281	0.00379885	-0.0284689	0.0223057	0.0104611	0.00914288	0.0263516
6282.94	0.000179408	0.000515834	0.000780225	-0.000347465	0.00026235	-0.00105	0.000557467	0.000274509	0.000431255	0.00113	0.111	0.11	0.115	0.092	0.086	0.071	0.062	0.084	0.083	0.104	0.00372231	0.0107997	0.0156249	-0.00869796	0.00702549	-0.0340585	0.0207072	0.00752612	0.011966	0.025023
6284.87	0.000304642	0.000675246	0.000896722	-0.000597298	0.000384644	-0.00131	0.00046134	0.000243485	0.000636175	0.00125	0.111	0.11	0.115	0.092	0.086	0.071	0.062	0.084	0.083	0.104	0.00632064	0.0141372	0.0179578	-0.0149519	0.0103004	-0.042492	0.0171365	0.00667555	0.0176519	0.0276803
6286.8	0.000327518	0.000651881	0.000895411	-0.000640929	0.000418022	-0.00143	0.000570863	0.000372171	0.000721678	0.00128	0.111	0.11	0.115	0.092	0.086	0.071	0.062	0.084	0.083	0.104	0.00679526	0.013648	0.0179316	-0.0160441	0.0111942	-0.0463844	0.0212048	0.0102037	0.0200244	0.0283446
6288.73	0.000289328	0.000466913	0.000699699	-0.000428796	0.000498459	-0.00123	0.000829235	0.000488788	0.000645578	0.0012	0.111	0.11	0.115	0.092	0.086	0.071	0.062	0.084	0.083	0.104	0.0060029	0.00977546	0.0140122	-0.0107339	0.0133483	-0.039897	0.0308021	0.0134009	0.0179128	0.0265731
6290.66	0.000270855	0.000211775	0.00058952	-0.000224233	0.000658914	-0.000868931	0.000909269	0.000432104	0.000597328	0.00117	0.111	0.11	0.115	0.092	0.086	0.071	0.062	0.084	0.083	0.104	0.00561963	0.0044338	0.0118058	-0.00561314	0.0176451	-0.0281852	0.0337749	0.0118469	0.0165741	0.0259087
6292.59	0.000299708	6.28978e-05	0.000660807	-0.000176191	0.000749335	-0.000667468	0.000749767	0.000395983	0.000628606	0.00121	0.111	0.11	0.115	0.092	0.086	0.071	0.062	0.084	0.083	0.104	0.00621827	0.00131685	0.0132334	-0.00441052	0.0200665	-0.0216504	0.0278502	0.0108565	0.0174419	0.0267945
6294.52	0.000327337	1.33216e-05	0.000738114	-0.000242472	0.000717372	-0.000745371	0.000604183	0.000481844	0.00060989	0.00123	0.111	0.11	0.115	0.092	0.086	0.071	0.062	0.084	0.083	0.104	0.00679151	0.000278906	0.0147815	-0.00606971	0.0192106	-0.0241773	0.0224425	0.0132106	0.0169226	0.0272374
6296.44	0.000334075	1.29789e-05	0.000762016	-0.000352591	0.000722379	-0.000942424	0.000659838	0.000568062	0.000585482	0.0012	0.111	0.11	0.115	0.092	0.086	0.071	0.062	0.084	0.083	0.104	0.0069313	0.000271731	0.0152602	-0.00882627	0.0193446	-0.030569	0.0245098	0.0155744	0.0162454	0.0265731
6298.37	0.000377933	0.000113681	0.000722289	-0.000475168	0.000798657	-0.00114	0.00073202	0.000608087	0.000590637	0.00122	0.111	0.11	0.115	0.092	0.086	0.071	0.062	0.084	0.083	0.104	0.00784126	0.00238007	0.0144646	-0.0118947	0.0213873	-0.0369777	0.027191	0.0166717	0.0163884	0.027016
6300.3	0.000449239	0.000275731	0.000694364	-0.000513941	0.000777185	-0.00126	0.00061053	0.000571936	0.000582606	0.00125	0.111	0.11	0.115	0.092	0.086	0.071	0.062	0.084	0.083	0.104	0.0093207	0.0057728	0.0139054	-0.0128653	0.0208123	-0.0408701	0.0226782	0.0156806	0.0161656	0.0276803
6302.23	0.000411333	0.000390664	0.000809819	-0.000465214	0.000679225	-0.00121	0.000480801	0.000479102	0.000548273	0.00116	0.111	0.11	0.115	0.092	0.086	0.071	0.062	0.084	0.083	0.104	0.00853423	0.00817908	0.0162175	-0.0116455	0.018189	-0.0392483	0.0178594	0.0131354	0.0152129	0.0256873
6304.16	0.000221704	0.000491515	0.000965267	-0.000463098	0.000648782	-0.00107	0.000582516	0.000415474	0.000465334	0.00101	0.111	0.11	0.115	0.092	0.086	0.071	0.062	0.084	0.083	0.104	0.00459986	0.0102905	0.0193305	-0.0115926	0.0173738	-0.0347072	0.0216377	0.0113909	0.0129116	0.0223657
6306.09	0.000112825	0.000502378	0.000975907	-0.000555843	0.00073038	-0.00102	0.000803992	0.000381172	0.000294626	0.000966713	0.111	0.11	0.115	0.092	0.086	0.071	0.062	0.084	0.083	0.104	0.00234086	0.010518	0.0195436	-0.0139142	0.0195589	-0.0330854	0.0298644	0.0104505	0.00817498	0.0214071
6308.02	0.000246179	0.000297904	0.000901103	-0.000574768	0.000881612	-0.00107	0.000917301	0.000278026	0.00015676	0.00121	0.111	0.11	0.115	0.092	0.086	0.071	0.062	0.084	0.083	0.104	0.00510766	0.00623703	0.0180456	-0.0143879	0.0236087	-0.0347072	0.0340733	0.00762255	0.00434962	0.0267945
6309.94	0.000413403	0.000112698	0.000905752	-0.000430524	0.00097172	-0.00119	0.000908419	5.46575e-05	0.000199243	0.00148	0.111	0.11	0.115	0.092	0.086	0.071	0.062	0.084	0.083	0.104	0.00857718	0.00235949	0.0181387	-0.0107771	0.0260218	-0.0385996	0.0337434	0.00149853	0.00552839	0.0327735
6311.87	0.000464889	0.000190973	0.000906855	-0.000300527	0.000982165	-0.00135	0.00086467	-8.09431e-05	0.00028947	0.00138	0.111	0.11	0.115	0.092	0.086	0.071	0.062	0.084	0.083	0.104	0.0096454	0.00399828	0.0181608	-0.00752297	0.0263015	-0.0437894	0.0321183	-0.00221919	0.00803192	0.030559
6313.8	0.000462628	0.000421166	0.000808597	-0.000389785	0.000975698	-0.00148	0.000740856	5.79655e-05	0.000250712	0.00116	0.111	0.11	0.115	0.092	0.086	0.071	0.062	0.084	0.083	0.104	0.00959849	0.00881768	0.016193	-0.00975734	0.0261283	-0.0480062	0.0275192	0.00158922	0.0069565	0.0256873
6315.73	0.000451397	0.000529036	0.000783145	-0.000581026	0.000901267	-0.00148	0.00058879	0.000371546	0.000129461	0.0012	0.111	0.11	0.115	0.092	0.086	0.071	0.062	0.084	0.083	0.104	0.00936547	0.0110761	0.0156833	-0.0145446	0.0241351	-0.0480062	0.0218707	0.0101866	0.00359215	0.0265731
6317.66	0.000353007	0.000465155	0.000835925	-0.000585526	0.000745937	-0.00132	0.000522509	0.000614464	8.88258e-05	0.00133	0.111	0.11	0.115	0.092	0.086	0.071	0.062	0.084	0.083	0.104	0.0073241	0.00973865	0.0167403	-0.0146572	0.0199755	-0.0428163	0.0194087	0.0168466	0.00246465	0.0294518
6319.59	0.000158117	0.000417471	0.000783712	-0.000359863	0.000628397	-0.00106	0.000530615	0.00074634	0.000196367	0.00131	0.111	0.11	0.115	0.092	0.086	0.071	0.062	0.084	0.083	0.104	0.00328057	0.00874032	0.0156947	-0.00900831	0.0168279	-0.0343828	0.0197098	0.0204622	0.00544859	0.0290089
6321.51	5.71956e-05	0.000443623	0.000636578	-0.000114411	0.000636011	-0.000861973	0.000615731	0.000768751	0.000295222	0.00121	0.111	0.11	0.115	0.092	0.086	0.071	0.062	0.084	0.083	0.104	0.00118668	0.00928785	0.0127482	-0.00286401	0.0170318	-0.0279595	0.0228714	0.0210766	0.00819152	0.0267945
6323.44	0.000109443	0.000434443	0.000495285	-2.74181e-06	0.000740916	-0.00076963	0.000784486	0.000628978	0.000273079	0.00116	0.111	0.11	0.115	0.092	0.086	0.071	0.062	0.084	0.083	0.104	0.0022707	0.00909566	0.00991862	-6.86347e-05	0.019841	-0.0249642	0.0291399	0.0172445	0.00757712	0.0256873
6325.37	0.000173237	0.000425279	0.000407606	5.1707e-05	0.00084047	-0.000696078	0.00088124	0.000428528	0.000257224	0.00117	0.111	0.11	0.115	0.092	0.086	0.071	0.062	0.084	0.083	0.104	0.00359428	0.0089038	0.00816275	0.00129436	0.022507	-0.0225784	0.0327338	0.0117488	0.00713719	0.0259087
6327.3	0.000208883	0.00051406	0.000444174	0.000177681	0.000835389	-0.000631571	0.000784635	0.000438064	0.000288934	0.00116	0.111	0.11	0.115	0.092	0.086	0.071	0.062	0.084	0.083	0.104	0.00433385	0.0107625	0.00889507	0.00444782	0.0223709	-0.020486	0.0291454	0.0120103	0.00801705	0.0256873
6329.23	0.000233504	0.000562996	0.000484496	0.000303149	0.000797242	-0.000646681	0.000694215	0.000627428	0.000309736	0.00112	0.111	0.11	0.115	0.092	0.086	0.071	0.062	0.084	0.083	0.104	0.00484468	0.0117871	0.00970256	0.00758861	0.0213494	-0.0209761	0.0257867	0.017202	0.00859424	0.0248015
6331.16	0.000229828	0.000477493	0.000478476	0.000246912	0.000799745	-0.000708803	0.000739366	0.000798881	0.000302136	0.00109	0.111	0.11	0.115	0.092	0.086	0.071	0.062	0.084	0.083	0.104	0.00476841	0.00999697	0.009582	0.00618085	0.0214164	-0.0229912	0.0274639	0.0219027	0.00838336	0.0241372
6333.09	0.000221203	0.000306636	0.000548422	1.07288e-05	0.000722244	-0.000719309	0.000790417	0.00089249	0.000283644	0.00116	0.111	0.11	0.115	0.092	0.086	0.071	0.062	0.084	0.083	0.104	0.00458946	0.00641984	0.0109827	0.00026857	0.019341	-0.023332	0.0293602	0.0244691	0.00787027	0.0256873
6335.01	0.00023034	0.000155285	0.000672936	-0.000204027	0.000614911	-0.000708595	0.000745088	0.00084728	0.000387639	0.00131	0.111	0.11	0.115	0.092	0.086	0.071	0.062	0.084	0.083	0.104	0.00477904	0.0032511	0.0134763	-0.00510733	0.0164667	-0.0229844	0.0276764	0.0232296	0.0107558	0.0290089
6336.94	0.000230344	0.000212088	0.000850648	-0.000330806	0.000622347	-0.000697091	0.000641495	0.000634253	0.000633568	0.00138	0.111	0.11	0.115	0.092	0.086	0.071	0.062	0.084	0.083	0.104	0.00477912	0.00444035	0.0170352	-0.00828094	0.0166659	-0.0226113	0.0238284	0.0173891	0.0175796	0.030559
6338.87	0.000380403	0.000433311	0.00104	-0.000455827	0.000664309	-0.000588298	0.000583604	0.000386208	0.00076808	0.00126	0.111	0.11	0.115	0.092	0.086	0.071	0.062	0.084	0.083	0.104	0.00789251	0.00907196	0.0208271	-0.0114105	0.0177896	-0.0190824	0.0216781	0.0105885	0.0213119	0.0279017
6340.8	0.000643917	0.000458345	0.00112	-0.000547141	0.000663951	-0.000395432	0.000568852	0.000207752	0.000713348	0.00107	0.111	0.11	0.115	0.092	0.086	0.071	0.062	0.084	0.083	0.104	0.0133598	0.00959608	0.0224292	-0.0136964	0.01778	-0.0128265	0.0211301	0.00569587	0.0197933	0.0236943
6342.73	0.000714581	0.000287116	0.00112	-0.000623137	0.000631809	-0.000308052	0.000523672	0.000120491	0.000627607	0.001	0.111	0.11	0.115	0.092	0.086	0.071	0.062	0.084	0.083	0.104	0.0148259	0.00601116	0.0224292	-0.0155987	0.0169193	-0.00999217	0.0194519	0.00330346	0.0174142	0.0221442
6344.66	0.000603884	0.000254259	0.001	-0.000765353	0.000534564	-0.000341445	0.000539735	0.000122875	0.000573099	0.00112	0.111	0.11	0.115	0.092	0.086	0.071	0.062	0.084	0.083	0.104	0.0125292	0.00532326	0.0200261	-0.0191588	0.0143151	-0.0110753	0.0200485	0.00336882	0.0159018	0.0248015
6346.58	0.000533525	0.000345707	0.000749379	-0.000796616	0.00039117	-0.000380918	0.000686005	0.000177175	0.000535756	0.00128	0.111	0.11	0.115	0.092	0.086	0.071	0.062	0.084	0.083	0.104	0.0110694	0.00723785	0.0150071	-0.0199414	0.0104752	-0.0123557	0.0254818	0.00485755	0.0148656	0.0283446
6348.51	0.000476203	0.000278845	0.000493288	-0.000603855	0.000360042	-0.000387043	0.000892118	0.000232577	0.000547692	0.00127	0.111	0.11	0.115	0.092	0.086	0.071	0.062	0.084	0.083	0.104	0.00988014	0.005838	0.00987863	-0.0151161	0.00964159	-0.0125544	0.0331379	0.00637649	0.0151968	0.0281232
6350.44	0.000348309	0.000125676	0.000427782	-0.000497013	0.000469759	-0.000433445	0.00105	0.000299841	0.000670537	0.00117	0.111	0.11	0.115	0.092	0.086	0.071	0.062	0.084	0.083	0.104	0.00722663	0.0026312	0.0085668	-0.0124415	0.0125797	-0.0140595	0.0390024	0.00822064	0.0186054	0.0259087
6352.37	0.000317959	0.000212193	0.000613153	-0.000607252	0.000605613	-0.000517681	0.00106	0.000333458	0.000791147	0.00126	0.111	0.11	0.115	0.092	0.086	0.071	0.062	0.084	0.083	0.104	0.00659693	0.00444255	0.0122791	-0.0152011	0.0162178	-0.0167918	0.0393739	0.00914231	0.0219519	0.0279017
6354.3	0.000474008	0.000526294	0.000812858	-0.000699311	0.000728071	-0.000499547	0.000994608	0.000267744	0.000771523	0.00157	0.111	0.11	0.115	0.092	0.086	0.071	0.062	0.084	0.083	0.104	0.0098346	0.0110187	0.0162784	-0.0175056	0.0194971	-0.0162036	0.0369449	0.00734065	0.0214074	0.0347664
6356.23	0.000624185	0.000681594	0.000826836	-0.000737995	0.000924513	-0.000370592	0.000917032	0.000254363	0.00069806	0.00185	0.111	0.11	0.115	0.092	0.086	0.071	0.062	0.084	0.083	0.104	0.0129504	0.0142701	0.0165583	-0.0184739	0.0247576	-0.0120208	0.0340633	0.00697379	0.0193691	0.0409668
6358.15	0.000652291	0.000524834	0.000735104	-0.000813305	0.00112	-0.000299543	0.000849858	0.000443727	0.000593573	0.002	0.111	0.11	0.115	0.092	0.086	0.071	0.062	0.084	0.083	0.104	0.0135336	0.0109881	0.0147213	-0.0203591	0.0299926	-0.00971616	0.0315681	0.0121655	0.0164699	0.0442885
6360.08	0.000681769	0.000362888	0.000664085	-0.000793248	0.00104	-0.000419185	0.00083065	0.000612021	0.000423327	0.00199	0.111	0.11	0.115	0.092	0.086	0.071	0.062	0.084	0.083	0.104	0.0141452	0.00759756	0.013299	-0.0198571	0.0278502	-0.0135969	0.0308546	0.0167796	0.011746	0.044067
6362.01	0.000705004	0.000439167	0.000627667	-0.000592142	0.000790492	-0.000637785	0.000918984	0.000546485	0.000413194	0.00185	0.111	0.11	0.115	0.092	0.086	0.071	0.062	0.084	0.083	0.104	0.0146272	0.00919456	0.0125697	-0.0148229	0.0211686	-0.0206876	0.0341358	0.0149828	0.0114649	0.0409668
6363.94	0.000537816	0.000592709	0.000686109	-0.000323176	0.000608206	-0.000765592	0.00107	0.000472367	0.000570208	0.00164	0.111	0.11	0.115	0.092	0.086	0.071	0.062	0.084	0.083	0.104	0.0111585	0.0124092	0.0137401	-0.00808994	0.0162872	-0.0248332	0.0397453	0.0129507	0.0158216	0.0363165
6365.87	0.000252521	0.000665173	0.000832021	-0.000172257	0.000614718	-0.000726894	0.00118	0.000564784	0.00058493	0.00142	0.111	0.11	0.115	0.092	0.086	0.071	0.062	0.084	0.083	0.104	0.00523924	0.0139263	0.0166621	-0.00431204	0.0164616	-0.023578	0.0438313	0.0154845	0.01623	0.0314448
6367.8	0.000113989	0.000726789	0.000889033	-0.000201672	0.000771433	-0.000554785	0.00127	0.000687033	0.000533328	0.00125	0.111	0.11	0.115	0.092	0.086	0.071	0.062	0.084	0.083	0.104	0.00236502	0.0152163	0.0178039	-0.00504838	0.0206583	-0.0179954	0.0471744	0.0188362	0.0147982	0.0276803
6369.73	0.000164031	0.000836983	0.000798345	-0.000262111	0.000877216	-0.000431165	0.00121	0.000809312	0.000668555	0.00129	0.111	0.11	0.115	0.092	0.086	0.071	0.062	0.084	0.083	0.104	0.00340327	0.0175234	0.0159877	-0.00656132	0.023491	-0.0139855	0.0449456	0.0221886	0.0185504	0.0285661
6371.65	0.000298665	0.000883385	0.000668764	-0.000228465	0.000853837	-0.000503898	0.000945255	0.000938058	0.000839233	0.00143	0.111	0.11	0.115	0.092	0.086	0.071	0.062	0.084	0.083	0.104	0.00619663	0.0184949	0.0133927	-0.00571907	0.022865	-0.0163447	0.0351116	0.0257184	0.0232862	0.0316662
6373.58	0.000386868	0.000768527	0.000610977	-0.000213116	0.000861481	-0.000735223	0.00078775	0.000956148	0.000880987	0.0016	0.111	0.11	0.115	0.092	0.086	0.071	0.062	0.084	0.083	0.104	0.00802664	0.0160902	0.0122355	-0.00533485	0.0230697	-0.0238481	0.0292611	0.0262144	0.0244447	0.0354308
6375.51	0.000404843	0.00055407	0.00072512	-0.000316113	0.000896946	-0.000975773	0.000890881	0.000828236	0.000809491	0.00186	0.111	0.11	0.115	0.092	0.086	0.071	0.062	0.084	0.083	0.104	0.00839958	0.0116002	0.0145213	-0.00791313	0.0240194	-0.0316508	0.0330919	0.0227075	0.0224609	0.0411883
6377.44	0.000430313	0.00038968	0.000896782	-0.000443995	0.000821337	-0.00103	0.00101	0.000716358	0.000599623	0.00207	0.111	0.11	0.115	0.092	0.086	0.071	0.062	0.084	0.083	0.104	0.00892803	0.00815848	0.017959	-0.0111144	0.0219946	-0.0334097	0.0375166	0.0196401	0.0166377	0.0458386
6379.37	0.000461861	0.000396207	0.00103	-0.00046578	0.000697046	-0.00082776	0.00107	0.000641167	0.000336051	0.00198	0.111	0.11	0.115	0.092	0.086	0.071	0.062	0.084	0.083	0.104	0.00958258	0.00829513	0.0206269	-0.0116597	0.0186662	-0.0268497	0.0397453	0.0175787	0.0093244	0.0438456
6381.3	0.000467631	0.000532359	0.00108	-0.000256211	0.000692323	-0.00056015	0.00114	0.000516921	0.000210941	0.00172	0.111	0.11	0.115	0.092	0.086	0.071	0.062	0.084	0.083	0.104	0.00970229	0.0111457	0.0216282	-0.00641363	0.0185398	-0.0181694	0.0423455	0.0141723	0.00585298	0.0380881
6383.23	0.000462643	0.000573516	0.00094074	-6.95288e-05	0.000833034	-0.000461772	0.00108	0.000488371	0.000310659	0.0016	0.111	0.11	0.115	0.092	0.086	0.071	0.062	0.084	0.083	0.104	0.0095988	0.0120073	0.0188393	-0.00174049	0.0223079	-0.0149783	0.0401168	0.0133895	0.00861985	0.0354308
6385.15	0.000417183	0.000433296	0.000780642	-0.000318855	0.00095208	-0.000573754	0.000883892	0.000666589	0.00049369	0.00169	0.111	0.11	0.115	0.092	0.086	0.071	0.062	0.084	0.083	0.104	0.00865561	0.00907164	0.0156332	-0.00798177	0.0254958	-0.0186106	0.0328323	0.0182756	0.0136984	0.0374237
6387.08	0.000279723	0.000313759	0.000854164	-0.000706285	0.000898644	-0.000689149	0.0007741	0.000916034	0.000587896	0.00183	0.111	0.11	0.115	0.092	0.086	0.071	0.062	0.084	0.083	0.104	0.00580362	0.00656897	0.0171056	-0.0176802	0.0240649	-0.0223537	0.0287541	0.0251146	0.0163123	0.0405239
6389.01	0.000162125	0.000341341	0.00108	-0.0007523	0.000739351	-0.000715479	0.000846356	0.00114	0.000604764	0.0019	0.111	0.11	0.115	0.092	0.086	0.071	0.062	0.084	0.083	0.104	0.00336373	0.00714644	0.0216282	-0.018832	0.0197991	-0.0232077	0.031438	0.031255	0.0167804	0.042074
6390.94	0.000118946	0.000415668	0.00116	-0.000584066	0.00072065	-0.000659987	0.000992447	0.00129	0.000637963	0.00197	0.111	0.11	0.115	0.092	0.086	0.071	0.062	0.084	0.083	0.104	0.00246786	0.00870258	0.0232303	-0.0146207	0.0192983	-0.0214077	0.0368646	0.0353675	0.0177016	0.0436241
6392.87	5.41148e-05	0.000495255	0.00103	-0.00045386	0.000997633	-0.000554621	0.00108	0.00131	0.000698894	0.00205	0.111	0.11	0.115	0.092	0.086	0.071	0.062	0.084	0.083	0.104	0.00112276	0.0103688	0.0206269	-0.0113613	0.0267157	-0.01799	0.0401168	0.0359158	0.0193922	0.0453957
6394.8	8.23997e-05	0.000610128	0.000898361	-0.00038451	0.00132	-0.000442132	0.00108	0.00118	0.000739112	0.00202	0.111	0.11	0.115	0.092	0.086	0.071	0.062	0.084	0.083	0.104	0.00170961	0.0127739	0.0179907	-0.00962529	0.0353484	-0.0143413	0.0401168	0.0323517	0.0205081	0.0447313
6396.72	0.00026661	0.000645205	0.000919759	-0.000350416	0.00136	-0.000414655	0.0011	0.00105	0.000680894	0.00195	0.111	0.11	0.115	0.092	0.086	0.071	0.062	0.084	0.083	0.104	0.00553156	0.0135082	0.0184192	-0.00877183	0.0364195	-0.01345	0.0408597	0.0287875	0.0188928	0.0431812
6398.65	0.00038493	0.000534475	0.00108	-0.00022006	0.00112	-0.000427663	0.00109	0.00103	0.000499621	0.00189	0.111	0.11	0.115	0.092	0.086	0.071	0.062	0.084	0.083	0.104	0.00798643	0.01119	0.0216282	-0.00550868	0.0299926	-0.0138719	0.0404882	0.0282392	0.013863	0.0418526
6400.58	0.000359542	0.000421956	0.00124	-0.000101835	0.000891924	-0.000405371	0.000998423	0.0011	0.000286341	0.00191	0.111	0.11	0.115	0.092	0.086	0.071	0.062	0.084	0.083	0.104	0.00745969	0.00883422	0.0248323	-0.0025492	0.0238849	-0.0131489	0.0370866	0.0301583	0.0079451	0.0422955
6402.51	0.000315422	0.000373185	0.00114	-0.000247836	0.000798196	-0.000336274	0.000878364	0.00111	0.000201196	0.00208	0.111	0.11	0.115	0.092	0.086	0.071	0.062	0.084	0.083	0.104	0.0065443	0.00781314	0.0228297	-0.00620398	0.0213749	-0.0109076	0.032627	0.0304325	0.00558258	0.04606
6404.44	0.000400749	0.000359684	0.000881076	-0.000512093	0.000770688	-0.000292182	0.000834316	0.00106	0.000278056	0.00223	0.111	0.11	0.115	0.092	0.086	0.071	0.062	0.084	0.083	0.104	0.00831464	0.00753048	0.0176445	-0.012819	0.0206383	-0.0094774	0.0309908	0.0290617	0.00771522	0.0493816
6406.37	0.000641526	0.000414938	0.000860512	-0.000654221	0.000790968	-0.000293642	0.000964224	0.00103	0.000337452	0.00213	0.111	0.11	0.115	0.092	0.086	0.071	0.062	0.084	0.083	0.104	0.0133102	0.00868729	0.0172327	-0.0163769	0.0211814	-0.00952475	0.0358163	0.0282392	0.00936328	0.0471672
6408.3	0.000810763	0.000489443	0.00101	-0.000793487	0.00087212	-0.000272736	0.00116	0.00103	0.000347123	0.00196	0.111	0.11	0.115	0.092	0.086	0.071	0.062	0.084	0.083	0.104	0.0168215	0.0102472	0.0202263	-0.019863	0.0233546	-0.00884663	0.0430884	0.0282392	0.00963162	0.0434027
6410.22	0.000718244	0.000437811	0.000992477	-0.000873357	0.000897676	-0.000313073	0.00132	0.000928312	0.000358641	0.00201	0.111	0.11	0.115	0.092	0.086	0.071	0.062	0.084	0.083	0.104	0.0149019	0.00916617	0.0198754	-0.0218624	0.0240389	-0.010155	0.0490316	0.0254512	0.00995121	0.0445099
6412.15	0.000399794	0.000303179	0.000846952	-0.000671387	0.000825524	-0.000524193	0.00144	0.000894934	0.000235647	0.00219	0.111	0.11	0.115	0.092	0.086	0.071	0.062	0.084	0.083	0.104	0.00829483	0.00634747	0.0169611	-0.0168066	0.0221068	-0.017003	0.053489	0.0245361	0.00653849	0.0484959
6414.08	6.65184e-05	0.000293404	0.000766248	-0.000377685	0.00076893	-0.000731289	0.00145	0.00103	6.54608e-05	0.00231	0.111	0.11	0.115	0.092	0.086	0.071	0.062	0.084	0.083	0.104	0.00138011	0.00614281	0.0153449	-0.00945444	0.0205912	-0.0237205	0.0538605	0.0282392	0.00181634	0.0511532
6416.01	-1.24239e-05	0.000479996	0.00072813	-0.000336587	0.000818834	-0.000771031	0.0013	0.00107	9.37879e-05	0.00233	0.111	0.11	0.115	0.092	0.086	0.071	0.062	0.084	0.083	0.104	-0.000257768	0.0100494	0.0145816	-0.00842565	0.0219276	-0.0250096	0.0482887	0.0293358	0.00260233	0.0515961
6417.94	0.000278613	0.000708908	0.000798672	-0.000480801	0.000995219	-0.00069949	0.00107	0.00104	0.000307724	0.00224	0.111	0.11	0.115	0.092	0.086	0.071	0.062	0.084	0.083	0.104	0.00578059	0.014842	0.0159943	-0.0120357	0.026651	-0.0226891	0.0397453	0.0285133	0.00853841	0.0496031
6419.87	0.000577235	0.000774264	0.00105	-0.000552446	0.00113	-0.000616729	0.000920847	0.00108	0.000481218	0.00218	0.111	0.11	0.115	0.092	0.086	0.071	0.062	0.084	0.083	0.104	0.0119763	0.0162103	0.0210274	-0.0138292	0.0302603	-0.0200046	0.034205	0.02961	0.0133524	0.0482744
6421.79	0.000531895	0.000648141	0.0013	-0.000581443	0.00109	-0.000588462	0.00099118	0.00103	0.000565082	0.00219	0.111	0.11	0.115	0.092	0.086	0.071	0.062	0.084	0.083	0.104	0.0110356	0.0135697	0.0260339	-0.014555	0.0291892	-0.0190877	0.0368175	0.0282392	0.0156793	0.0484959
6423.72	0.00032896	0.000508711	0.00138	-0.000565827	0.000989378	-0.000532866	0.00128	0.000973254	0.00066562	0.00217	0.111	0.11	0.115	0.092	0.086	0.071	0.062	0.084	0.083	0.104	0.00682518	0.0106506	0.027636	-0.0141641	0.0264946	-0.0172844	0.0475458	0.0266834	0.018469	0.048053
6425.65	0.000380372	0.000554636	0.00138	-0.000376374	0.00098671	-0.000367075	0.00153	0.0011	0.000757217	0.00206	0.111	0.11	0.115	0.092	0.086	0.071	0.062	0.084	0.083	0.104	0.00789186	0.0116121	0.027636	-0.00942162	0.0264232	-0.0119067	0.0568321	0.0301583	0.0210105	0.0456171
6427.58	0.000619329	0.000777111	0.00137	-0.000177979	0.00106	-0.000298157	0.00154	0.00129	0.000726506	0.002	0.111	0.11	0.115	0.092	0.086	0.071	0.062	0.084	0.083	0.104	0.0128497	0.0162699	0.0274357	-0.00445528	0.0283858	-0.00967121	0.0572035	0.0353675	0.0201584	0.0442885
6429.51	0.000665974	0.000956565	0.0013	-0.00023967	0.00108	-0.000446558	0.00142	0.00135	0.000671819	0.00201	0.111	0.11	0.115	0.092	0.086	0.071	0.062	0.084	0.083	0.104	0.0138175	0.020027	0.0260339	-0.00599957	0.0289214	-0.0144848	0.0527461	0.0370125	0.018641	0.0445099
6431.44	0.000551343	0.00104	0.00117	-0.000433594	0.000968352	-0.000647113	0.00125	0.00134	0.000657991	0.00207	0.111	0.11	0.115	0.092	0.086	0.071	0.062	0.084	0.083	0.104	0.0114391	0.0217738	0.0234305	-0.010854	0.0259316	-0.0209902	0.0464315	0.0367383	0.0182573	0.0458386
6433.36	0.000467214	0.000968903	0.0011	-0.000594586	0.000801817	-0.000794962	0.00107	0.00134	0.000550121	0.00228	0.111	0.11	0.115	0.092	0.086	0.071	0.062	0.084	0.083	0.104	0.00969364	0.0202853	0.0220287	-0.014884	0.0214719	-0.0257859	0.0397453	0.0367383	0.0152642	0.0504888
6435.29	0.000442421	0.000784382	0.00118	-0.000681251	0.000688553	-0.000809267	0.00108	0.0014	0.000426397	0.00258	0.111	0.11	0.115	0.092	0.086	0.071	0.062	0.084	0.083	0.104	0.00917924	0.0164221	0.0236308	-0.0170535	0.0184388	-0.0262499	0.0401168	0.0383833	0.0118312	0.0571321
6437.22	0.000530431	0.000747651	0.00138	-0.000614643	0.000734732	-0.00064145	0.00132	0.0015	0.000453263	0.00266	0.111	0.11	0.115	0.092	0.086	0.071	0.062	0.084	0.083	0.104	0.0110052	0.0156531	0.027636	-0.0153861	0.0196754	-0.0208065	0.0490316	0.041125	0.0125767	0.0589037
6439.15	0.000692545	0.000847012	0.00142	-0.000457257	0.000898853	-0.00046292	0.00156	0.00148	0.000564441	0.00242	0.111	0.11	0.115	0.092	0.086	0.071	0.062	0.084	0.083	0.104	0.0143687	0.0177334	0.028437	-0.0114463	0.0240704	-0.0150156	0.0579465	0.0405767	0.0156615	0.053589
6441.08	0.000713454	0.000828907	0.00128	-0.000400066	0.00102	-0.000449359	0.00165	0.00134	0.000621513	0.00213	0.111	0.11	0.115	0.092	0.086	0.071	0.062	0.084	0.083	0.104	0.0148026	0.0173543	0.0256334	-0.0100147	0.0273147	-0.0145757	0.0612895	0.0367383	0.0172451	0.0471672
6443.01	0.000578854	0.000743881	0.00123	-0.000505954	0.00104	-0.000475973	0.00157	0.0013	0.000649348	0.00206	0.111	0.11	0.115	0.092	0.086	0.071	0.062	0.084	0.083	0.104	0.0120099	0.0155742	0.0246321	-0.0126653	0.0278502	-0.015439	0.0583179	0.0356417	0.0180175	0.0456171
6444.94	0.000502877	0.000816107	0.00131	-0.000695467	0.00098829	-0.000409663	0.0014	0.00138	0.000641048	0.00214	0.111	0.11	0.115	0.092	0.086	0.071	0.062	0.084	0.083	0.104	0.0104336	0.0170863	0.0262342	-0.0174094	0.0264655	-0.0132881	0.0520032	0.037835	0.0177872	0.0473887
6446.86	0.000544336	0.000955954	0.00135	-0.000747234	0.000962809	-0.000312775	0.00123	0.00145	0.000565305	0.00226	0.111	0.11	0.115	0.092	0.086	0.071	0.062	0.084	0.083	0.104	0.0112937	0.0200142	0.0270352	-0.0187052	0.0257831	-0.0101454	0.0456885	0.0397542	0.0156855	0.050046
6448.79	0.000592604	0.000982538	0.00132	-0.000527322	0.000878677	-0.000225216	0.00114	0.00149	0.000531048	0.00238	0.111	0.11	0.115	0.092	0.086	0.071	0.062	0.084	0.083	0.104	0.0122952	0.0205708	0.0264344	-0.0132002	0.0235302	-0.00730525	0.0423455	0.0408508	0.014735	0.0527033
6450.72	0.000680747	0.000931323	0.00128	-0.000240117	0.000685513	-0.000225812	0.00121	0.0015	0.000601694	0.00252	0.111	0.11	0.115	0.092	0.086	0.071	0.062	0.084	0.083	0.104	0.014124	0.0194985	0.0256334	-0.00601075	0.0183574	-0.00732458	0.0449456	0.041125	0.0166952	0.0558035
6452.65	0.00086095	0.000950009	0.00123	-0.000200659	0.000573754	-0.000480533	0.00142	0.00156	0.000685245	0.00261	0.111	0.11	0.115	0.092	0.086	0.071	0.062	0.084	0.083	0.104	0.0178628	0.0198897	0.0246321	-0.00502302	0.0153646	-0.0155869	0.0527461	0.04277	0.0190135	0.0577964
6454.58	0.000960733	0.00108	0.00123	-0.000397533	0.000632882	-0.00080432	0.0016	0.00175	0.000735968	0.00256	0.111	0.11	0.115	0.092	0.086	0.071	0.062	0.084	0.083	0.104	0.019933	0.0226113	0.0246321	-0.00995129	0.016948	-0.0260894	0.0594323	0.0479792	0.0204209	0.0566892
6456.51	0.00080466	0.00115	0.00134	-0.000538677	0.000758082	-0.000781685	0.00159	0.00204	0.00072965	0.00236	0.111	0.11	0.115	0.092	0.086	0.071	0.062	0.084	0.083	0.104	0.0166949	0.0240768	0.026835	-0.0134845	0.0203007	-0.0253552	0.0590608	0.05593	0.0202456	0.0522604
6458.44	0.000549749	0.00105	0.00142	-0.000497401	0.00086534	-0.000505924	0.00143	0.00225	0.000621602	0.00222	0.111	0.11	0.115	0.092	0.086	0.071	0.062	0.084	0.083	0.104	0.0114061	0.0219832	0.028437	-0.0124512	0.023173	-0.0164105	0.0531176	0.0616875	0.0172476	0.0491602
6460.36	0.00045893	0.000904366	0.00132	-0.000417262	0.000853941	-0.000414491	0.00133	0.00227	0.000517696	0.0023	0.111	0.11	0.115	0.092	0.086	0.071	0.062	0.084	0.083	0.104	0.00952176	0.0189341	0.0264344	-0.0104452	0.0228677	-0.0134447	0.0494031	0.0622358	0.0143645	0.0509317
6462.29	0.000533574	0.000869706	0.00111	-0.000343829	0.000743523	-0.000565976	0.00141	0.00212	0.000517011	0.00239	0.111	0.11	0.115	0.092	0.086	0.071	0.062	0.084	0.083	0.104	0.0110705	0.0182085	0.022229	-0.00860694	0.0199109	-0.0183583	0.0523747	0.0581233	0.0143455	0.0529247
6464.22	0.000625636	0.000874087	0.000926048	-0.000211597	0.000628069	-0.000593439	0.00164	0.00195	0.000479907	0.00242	0.111	0.11	0.115	0.092	0.086	0.071	0.062	0.084	0.083	0.104	0.0129805	0.0183002	0.0185451	-0.00529682	0.0168191	-0.0192492	0.0609181	0.0534625	0.013316	0.053589
6466.15	0.000705196	0.00069803	0.000851512	-8.79765e-05	0.000555977	-0.000425875	0.00174	0.00187	0.000324741	0.00244	0.111	0.11	0.115	0.092	0.086	0.071	0.062	0.084	0.083	0.104	0.0146312	0.0146142	0.0170525	-0.00220228	0.0148885	-0.0138139	0.0646326	0.0512692	0.00901058	0.0540319
6468.08	0.000716048	0.000493616	0.000890434	-0.000133991	0.000583902	-0.000376836	0.00163	0.00185	0.00025627	0.00241	0.111	0.11	0.115	0.092	0.086	0.071	0.062	0.084	0.083	0.104	0.0148564	0.0103345	0.0178319	-0.00335414	0.0156364	-0.0122233	0.0605466	0.0507208	0.00711072	0.0533676
6470.01	0.000532187	0.000494078	0.00106	-0.00032416	0.000693902	-0.000452146	0.00163	0.00177	0.000358134	0.00237	0.111	0.11	0.115	0.092	0.086	0.071	0.062	0.084	0.083	0.104	0.0110417	0.0103442	0.0212277	-0.00811457	0.0185821	-0.0146661	0.0605466	0.0485275	0.00993714	0.0524818
6471.94	0.000302771	0.000616908	0.00126	-0.000483275	0.000805244	-0.000463516	0.0018	0.00163	0.000496998	0.00236	0.111	0.11	0.115	0.092	0.086	0.071	0.062	0.084	0.083	0.104	0.00628182	0.0129158	0.0252329	-0.0120976	0.0215637	-0.0150349	0.0668613	0.0446892	0.0137902	0.0522604
6473.86	0.000292194	0.00068754	0.00134	-0.000491172	0.000818253	-0.000462145	0.00189	0.00155	0.000595599	0.00233	0.111	0.11	0.115	0.092	0.086	0.071	0.062	0.084	0.083	0.104	0.00606237	0.0143946	0.026835	-0.0122953	0.0219121	-0.0149904	0.0702044	0.0424958	0.0165261	0.0515961
6475.79	0.000479997	0.000689864	0.00127	-0.000431776	0.000722632	-0.000486404	0.00179	0.00158	0.000752121	0.00238	0.111	0.11	0.115	0.092	0.086	0.071	0.062	0.084	0.083	0.104	0.00995886	0.0144432	0.0254331	-0.0108085	0.0193514	-0.0157773	0.0664898	0.0433183	0.0208691	0.0527033
6477.72	0.000645762	0.000765741	0.0013	-0.000466794	0.00066027	-0.000473872	0.00172	0.00172	0.000931278	0.00261	0.111	0.11	0.115	0.092	0.086	0.071	0.062	0.084	0.083	0.104	0.0133981	0.0160318	0.0260339	-0.0116851	0.0176814	-0.0153708	0.0638897	0.0471567	0.0258402	0.0577964
6479.65	0.000735067	0.000912711	0.00147	-0.000552088	0.00076063	-0.000405356	0.00176	0.00186	0.000889853	0.00282	0.111	0.11	0.115	0.092	0.086	0.071	0.062	0.084	0.083	0.104	0.015251	0.0191088	0.0294383	-0.0138202	0.020369	-0.0131484	0.0653755	0.050995	0.0246907	0.0624467
6481.58	0.000849317	0.000926778	0.00149	-0.000549316	0.000909731	-0.000279948	0.00178	0.00199	0.000685588	0.00288	0.111	0.11	0.115	0.092	0.086	0.071	0.062	0.084	0.083	0.104	0.0176214	0.0194034	0.0298389	-0.0137508	0.0243617	-0.00908057	0.0661184	0.0545592	0.019023	0.0637754
6483.51	0.000952675	0.000742272	0.00126	-0.000405282	0.000953823	-0.000226125	0.00171	0.00202	0.000637457	0.00279	0.111	0.11	0.115	0.092	0.086	0.071	0.062	0.084	0.083	0.104	0.0197659	0.0155405	0.0252329	-0.0101453	0.0255425	-0.00733473	0.0635182	0.0553817	0.0176875	0.0617824
6485.43	0.00107	0.000550479	0.00105	-0.00017494	0.000905022	-0.00033024	0.0017	0.00189	0.000761852	0.00263	0.111	0.11	0.115	0.092	0.086	0.071	0.062	0.084	0.083	0.104	0.0222001	0.011525	0.0210274	-0.0043792	0.0242356	-0.0107119	0.0631468	0.0518175	0.0211391	0.0582393
6487.36	0.00129	0.000572696	0.00112	2.98619e-05	0.000901729	-0.000523746	0.00187	0.00186	0.000851452	0.00262	0.111	0.11	0.115	0.092	0.086	0.071	0.062	0.084	0.083	0.104	0.0267646	0.0119902	0.0224292	0.000747521	0.0241475	-0.0169885	0.0694615	0.050995	0.0236252	0.0580179
6489.29	0.00132	0.000833988	0.0014	9.33409e-05	0.000893608	-0.000661179	0.00201	0.00192	0.000907093	0.00279	0.111	0.11	0.115	0.092	0.086	0.071	0.062	0.084	0.083	0.104	0.027387	0.0174607	0.0280365	0.00233657	0.02393	-0.0214464	0.0746618	0.05264	0.0251691	0.0617824
6491.22	0.000957636	0.00114	0.00159	-7.00355e-05	0.000711009	-0.000657618	0.00187	0.00191	0.00099197	0.003	0.111	0.11	0.115	0.092	0.086	0.071	0.062	0.084	0.083	0.104	0.0198688	0.0238675	0.0318415	-0.00175317	0.0190402	-0.0213309	0.0694615	0.0523658	0.0275242	0.0664327
6493.15	0.000586854	0.00123	0.00158	-0.00031653	0.000400111	-0.000502706	0.00161	0.00196	0.00102	0.00314	0.111	0.11	0.115	0.092	0.086	0.071	0.062	0.084	0.083	0.104	0.0121759	0.0257517	0.0316412	-0.00792357	0.0107146	-0.0163061	0.0598037	0.0537367	0.0283019	0.0695329
6495.08	0.000448514	0.00114	0.00154	-0.000462383	0.000204399	-0.000372052	0.00155	0.00208	0.000887677	0.00321	0.111	0.11	0.115	0.092	0.086	0.071	0.062	0.084	0.083	0.104	0.00930566	0.0238675	0.0308402	-0.0115747	0.00547362	-0.0120681	0.057575	0.0570267	0.0246304	0.071083
6497	0.000422812	0.001	0.00161	-0.000493228	0.000332564	-0.000419334	0.00158	0.00209	0.000649929	0.00322	0.111	0.11	0.115	0.092	0.086	0.071	0.062	0.084	0.083	0.104	0.0087724	0.0209364	0.032242	-0.0123468	0.00890575	-0.0136018	0.0586894	0.0573008	0.0180336	0.0713044
6498.93	0.000389468	0.000850841	0.00176	-0.000466824	0.000661671	-0.000539571	0.00153	0.00201	0.000503346	0.00305	0.111	0.11	0.115	0.092	0.086	0.071	0.062	0.084	0.083	0.104	0.00808058	0.0178135	0.0352459	-0.0116858	0.0177189	-0.0175019	0.0568321	0.0551075	0.0139663	0.0675399
6500.86	0.000412792	0.000665203	0.0019	-0.000440449	0.000846624	-0.000606597	0.00154	0.002	0.000537649	0.00281	0.111	0.11	0.115	0.092	0.086	0.071	0.062	0.084	0.083	0.104	0.0085645	0.0139269	0.0380496	-0.0110256	0.0226718	-0.019676	0.0572035	0.0548333	0.0149181	0.0622253
6502.79	0.000615689	0.000573754	0.002	-0.000459492	0.000770465	-0.000611365	0.0017	0.00206	0.000570327	0.00274	0.111	0.11	0.115	0.092	0.086	0.071	0.062	0.084	0.083	0.104	0.0127742	0.0120123	0.0400522	-0.0115023	0.0206323	-0.0198306	0.0631468	0.0564783	0.0158249	0.0606752
6504.72	0.000990992	0.000756607	0.00197	-0.000488549	0.000714153	-0.000474051	0.00179	0.00224	0.000552297	0.00288	0.111	0.11	0.115	0.092	0.086	0.071	0.062	0.084	0.083	0.104	0.0205609	0.0158406	0.0394514	-0.0122297	0.0191244	-0.0153766	0.0664898	0.0614133	0.0153246	0.0637754
6506.65	0.00134	0.00117	0.00191	-0.000240892	0.000890419	-0.000218153	0.00174	0.00246	0.000688061	0.00305	0.111	0.11	0.115	0.092	0.086	0.071	0.062	0.084	0.083	0.104	0.027802	0.0244955	0.0382498	-0.00603016	0.0238446	-0.00707615	0.0646326	0.067445	0.0190916	0.0675399
6508.57	0.00137	0.00153	0.00191	0.000245929	0.00105	-6.68764e-05	0.00177	0.00243	0.000983998	0.00311	0.111	0.11	0.115	0.092	0.086	0.071	0.062	0.084	0.083	0.104	0.0284244	0.0320326	0.0382498	0.00615624	0.028118	-0.00216924	0.0657469	0.0666225	0.027303	0.0688686
6510.5	0.00117	0.0017	0.00187	0.000343531	0.00104	-0.000129476	0.00187	0.00213	0.00112	0.00311	0.111	0.11	0.115	0.092	0.086	0.071	0.062	0.084	0.083	0.104	0.0242749	0.0355918	0.0374488	0.00859948	0.0278502	-0.00419976	0.0694615	0.0583975	0.0310766	0.0688686
6512.43	0.00104	0.00174	0.00169	-8.81851e-05	0.001	-0.000313654	0.00192	0.0019	0.00104	0.00312	0.111	0.11	0.115	0.092	0.086	0.071	0.062	0.084	0.083	0.104	0.0215777	0.0364293	0.0338441	-0.0022075	0.0267791	-0.0101739	0.0713187	0.0520917	0.0288569	0.06909
6514.36	0.000859194	0.00164	0.00151	-0.000461787	0.000895053	-0.000499189	0.00188	0.00199	0.000969499	0.00316	0.111	0.11	0.115	0.092	0.086	0.071	0.062	0.084	0.083	0.104	0.0178263	0.0343356	0.0302394	-0.0115597	0.0239687	-0.016192	0.0698329	0.0545592	0.0269007	0.0699758
6516.29	0.000725355	0.00143	0.00151	-0.000505626	0.000743315	-0.000621051	0.00185	0.00227	0.000947371	0.00327	0.111	0.11	0.115	0.092	0.086	0.071	0.062	0.084	0.083	0.104	0.0150495	0.029939	0.0302394	-0.0126571	0.0199053	-0.0201448	0.0687185	0.0622358	0.0262867	0.0724116
6518.22	0.00102	0.0013	0.00169	-0.000459433	0.000802055	-0.000590116	0.00191	0.00245	0.000832483	0.00348	0.111	0.11	0.115	0.092	0.086	0.071	0.062	0.084	0.083	0.104	0.0211627	0.0272173	0.0338441	-0.0115008	0.0214783	-0.0191414	0.0709473	0.0671708	0.0230989	0.0770619
6520.15	0.00155	0.00128	0.00189	-0.000490904	0.00104	-0.000451311	0.00197	0.0024	0.000588626	0.00354	0.111	0.11	0.115	0.092	0.086	0.071	0.062	0.084	0.083	0.104	0.032159	0.0267985	0.0378493	-0.0122886	0.0278502	-0.014639	0.073176	0.0658	0.0163326	0.0783906
6522.07	0.00172	0.00124	0.00187	-0.000591874	0.00112	-0.000519514	0.00193	0.00239	0.000390589	0.00333	0.111	0.11	0.115	0.092	0.086	0.071	0.062	0.084	0.083	0.104	0.0356861	0.0259611	0.0374488	-0.0148162	0.0299926	-0.0168513	0.0716902	0.0655258	0.0108377	0.0737403
6524	0.00151	0.00117	0.00164	-0.00058955	0.000976995	-0.000795245	0.00191	0.0025	0.000273883	0.00312	0.111	0.11	0.115	0.092	0.086	0.071	0.062	0.084	0.083	0.104	0.0313291	0.0244955	0.0328428	-0.014758	0.026163	-0.0257951	0.0709473	0.0685417	0.00759943	0.06909
6525.93	0.00134	0.00109	0.00155	-0.000327468	0.000930056	-0.000858739	0.00192	0.00259	0.000177756	0.00316	0.111	0.11	0.115	0.092	0.086	0.071	0.062	0.084	0.083	0.104	0.027802	0.0228206	0.0310404	-0.00819738	0.024906	-0.0278546	0.0713187	0.0710092	0.00493219	0.0699758
6527.86	0.00135	0.00105	0.00166	-5.54025e-05	0.00103	-0.000587478	0.00194	0.00258	0.000221491	0.00329	0.111	0.11	0.115	0.092	0.086	0.071	0.062	0.084	0.083	0.104	0.0280095	0.0219832	0.0332433	-0.00138687	0.0275824	-0.0190558	0.0720616	0.070735	0.00614571	0.0728545
6529.79	0.00135	0.00112	0.00171	-9.90927e-05	0.00114	-0.000367522	0.00214	0.0025	0.000449032	0.00328	0.111	0.11	0.115	0.092	0.086	0.071	0.062	0.084	0.083	0.104	0.0280095	0.0234487	0.0342446	-0.00248055	0.0305281	-0.0119212	0.0794906	0.0685417	0.0124593	0.0726331
6531.72	0.00134	0.00123	0.00169	-0.000379801	0.00118	-0.000409961	0.00241	0.00248	0.000684276	0.00326	0.111	0.11	0.115	0.092	0.086	0.071	0.062	0.084	0.083	0.104	0.027802	0.0257517	0.0338441	-0.00950741	0.0315993	-0.0132977	0.0895198	0.0679933	0.0189866	0.0721902
6533.65	0.00133	0.00123	0.00176	-0.000619739	0.00105	-0.000388026	0.00242	0.00272	0.000810206	0.0034	0.111	0.11	0.115	0.092	0.086	0.071	0.062	0.084	0.083	0.104	0.0275945	0.0257517	0.0352459	-0.0155137	0.028118	-0.0125863	0.0898913	0.0745733	0.0224808	0.0752904
6535.57	0.00124	0.00114	0.00197	-0.000659645	0.000822455	-0.000109255	0.00214	0.00304	0.00095588	0.0036	0.111	0.11	0.115	0.092	0.086	0.071	0.062	0.084	0.083	0.104	0.0257272	0.0238675	0.0394514	-0.0165126	0.0220246	-0.00354386	0.0794906	0.0833467	0.0265228	0.0797192
6537.5	0.00109	0.00103	0.00223	-0.000602096	0.000817791	3.65675e-05	0.00188	0.00312	0.0011	0.00368	0.111	0.11	0.115	0.092	0.086	0.071	0.062	0.084	0.083	0.104	0.022615	0.0215645	0.0446582	-0.015072	0.0218997	0.00118613	0.0698329	0.08554	0.0305217	0.0814908
6539.43	0.000963575	0.00105	0.0025	-0.000563323	0.00101	-7.53701e-05	0.00188	0.00304	0.00103	0.00366	0.111	0.11	0.115	0.092	0.086	0.071	0.062	0.084	0.083	0.104	0.019992	0.0219832	0.0500652	-0.0141014	0.0270469	-0.00244475	0.0698329	0.0833467	0.0285794	0.0810479
6541.36	0.000834087	0.00125	0.00271	-0.000505358	0.0011	-0.000202879	0.00198	0.00299	0.000816956	0.00366	0.111	0.11	0.115	0.092	0.086	0.071	0.062	0.084	0.083	0.104	0.0173054	0.0261705	0.0542707	-0.0126504	0.029457	-0.00658071	0.0735474	0.0819758	0.0226681	0.0810479
6543.29	0.000760701	0.00156	0.0028	-0.00039944	0.00107	-0.000297695	0.0019	0.00297	0.000661761	0.0037	0.111	0.11	0.115	0.092	0.086	0.071	0.062	0.084	0.083	0.104	0.0157828	0.0326607	0.056073	-0.00999903	0.0286536	-0.00965622	0.0705758	0.0814275	0.0183619	0.0819337
6545.22	0.000899614	0.00179	0.00281	-0.000112265	0.00114	-0.000352919	0.00176	0.00301	0.000650436	0.00371	0.111	0.11	0.115	0.092	0.086	0.071	0.062	0.084	0.083	0.104	0.018665	0.0374761	0.0562733	-0.00281029	0.0305281	-0.0114475	0.0653755	0.0825242	0.0180476	0.0821551
6547.15	0.00115	0.00181	0.00272	0.000236452	0.00129	-0.000297144	0.0018	0.00316	0.000742734	0.00354	0.111	0.11	0.115	0.092	0.086	0.071	0.062	0.084	0.083	0.104	0.0238599	0.0378948	0.054471	0.00591901	0.034545	-0.00963835	0.0668613	0.0866367	0.0206086	0.0783906
6549.07	0.00136	0.00173	0.00263	0.000215143	0.00141	-0.00024201	0.00197	0.00331	0.00091213	0.00321	0.111	0.11	0.115	0.092	0.086	0.071	0.062	0.084	0.083	0.104	0.0282169	0.0362199	0.0526686	0.00538559	0.0377585	-0.00784999	0.073176	0.0907492	0.0253089	0.071083
6551	0.00156	0.00164	0.00279	-2.87294e-05	0.00153	-0.000154614	0.00213	0.00336	0.0011	0.00304	0.111	0.11	0.115	0.092	0.086	0.071	0.062	0.084	0.083	0.104	0.0323665	0.0343356	0.0558728	-0.000719172	0.040972	-0.00501516	0.0791192	0.09212	0.0305217	0.0673185
6552.93	0.00176	0.00159	0.00303	-7.01547e-05	0.0016	1.885e-05	0.00227	0.00346	0.0012	0.00316	0.111	0.11	0.115	0.092	0.086	0.071	0.062	0.084	0.083	0.104	0.036516	0.0332888	0.060679	-0.00175616	0.0428465	0.00061143	0.0843195	0.0948617	0.0332964	0.0699758
6554.86	0.00179	0.00154	0.00299	-8.84831e-05	0.00152	0.000129804	0.00239	0.00364	0.00124	0.00336	0.111	0.11	0.115	0.092	0.086	0.071	0.062	0.084	0.083	0.104	0.0371385	0.032242	0.059878	-0.00221496	0.0407042	0.0042104	0.0887769	0.0997967	0.0344063	0.0744046
6556.79	0.00162	0.00155	0.00266	-0.000364214	0.00135	0.00015679	0.00242	0.0037	0.00131	0.00345	0.111	0.11	0.115	0.092	0.086	0.071	0.062	0.084	0.083	0.104	0.0336114	0.0324514	0.0532694	-0.00911723	0.0361517	0.00508574	0.0898913	0.101442	0.0363486	0.0763976
6558.72	0.00147	0.00169	0.00228	-0.000670344	0.00125	9.94206e-05	0.00233	0.0037	0.00137	0.00343	0.111	0.11	0.115	0.092	0.086	0.071	0.062	0.084	0.083	0.104	0.0304992	0.0353825	0.0456595	-0.0167805	0.0334738	0.00322487	0.0865482	0.101442	0.0380134	0.0759547
6560.64	0.00156	0.00187	0.00223	-0.000597805	0.00121	-0.0001124	0.00221	0.00383	0.00135	0.00344	0.111	0.11	0.115	0.092	0.086	0.071	0.062	0.084	0.083	0.104	0.0323665	0.039151	0.0446582	-0.0149646	0.0324027	-0.00364588	0.0820908	0.105006	0.0374584	0.0761762
6562.57	0.00188	0.00188	0.00251	-0.000143945	0.0012	-0.000324532	0.00219	0.00393	0.00131	0.00347	0.111	0.11	0.115	0.092	0.086	0.071	0.062	0.084	0.083	0.104	0.0390058	0.0393604	0.0502655	-0.00360332	0.0321349	-0.0105267	0.0813479	0.107748	0.0363486	0.0768405
6564.5	0.0021	0.00192	0.00257	0.000160039	0.00124	-0.00038287	0.00224	0.00392	0.00132	0.0034	0.111	0.11	0.115	0.092	0.086	0.071	0.062	0.084	0.083	0.104	0.0435703	0.0401978	0.051467	0.00400619	0.033206	-0.012419	0.0832052	0.107473	0.036626	0.0752904
6566.43	0.00206	0.00207	0.00236	0.000195831	0.00133	-0.000366747	0.00222	0.00385	0.0012	0.00338	0.111	0.11	0.115	0.092	0.086	0.071	0.062	0.084	0.083	0.104	0.0427404	0.0433383	0.0472616	0.00490216	0.0356162	-0.011896	0.0824623	0.105554	0.0332964	0.0748475
6568.36	0.00191	0.00217	0.0023	0.000265986	0.0013	-0.000403598	0.00216	0.00362	0.000842676	0.00346	0.111	0.11	0.115	0.092	0.086	0.071	0.062	0.084	0.083	0.104	0.0396282	0.0454319	0.04606	0.00665832	0.0348128	-0.0130914	0.0802335	0.0992483	0.0233817	0.076619
6570.29	0.00182	0.00221	0.00231	0.000259489	0.00101	-0.000505879	0.00215	0.00333	0.000468522	0.00356	0.111	0.11	0.115	0.092	0.086	0.071	0.062	0.084	0.083	0.104	0.0377609	0.0462694	0.0462603	0.00649569	0.0270469	-0.016409	0.0798621	0.0912975	0.0130001	0.0788335
6572.22	0.00185	0.00216	0.00221	5.97239e-05	0.00062409	-0.000608906	0.00219	0.00335	0.00039646	0.00367	0.111	0.11	0.115	0.092	0.086	0.071	0.062	0.084	0.083	0.104	0.0383833	0.0452225	0.0442577	0.00149505	0.0167125	-0.0197509	0.0813479	0.0918458	0.0110006	0.0812693
6574.14	0.00194	0.00195	0.00227	-9.06587e-05	0.000434577	-0.000560313	0.00218	0.00364	0.000642747	0.00383	0.111	0.11	0.115	0.092	0.086	0.071	0.062	0.084	0.083	0.104	0.0402506	0.0408259	0.0454592	-0.00226942	0.0116376	-0.0181747	0.0809765	0.0997967	0.0178343	0.0848124
6576.07	0.00195	0.00175	0.00263	-0.000156701	0.000537068	-0.000291273	0.00218	0.00376	0.000935584	0.00398	0.111	0.11	0.115	0.092	0.086	0.071	0.062	0.084	0.083	0.104	0.0404581	0.0366386	0.0526686	-0.00392263	0.0143822	-0.00944791	0.0809765	0.103087	0.0259596	0.088134
6578	0.00187	0.00171	0.00287	-0.000247806	0.000784352	-0.000111908	0.00227	0.00367	0.00104	0.00395	0.111	0.11	0.115	0.092	0.086	0.071	0.062	0.084	0.083	0.104	0.0387983	0.0358012	0.0574749	-0.00620323	0.0210042	-0.00362992	0.0843195	0.100619	0.0288569	0.0874697
6579.93	0.00186	0.00177	0.00274	-0.000252217	0.00104	-0.000101998	0.00236	0.00366	0.00104	0.00368	0.111	0.11	0.115	0.092	0.086	0.071	0.062	0.084	0.083	0.104	0.0385908	0.0370574	0.0548715	-0.00631365	0.0278502	-0.00330847	0.0876626	0.100345	0.0288569	0.0814908
6581.86	0.00193	0.00186	0.00254	-0.0001688	0.00112	-0.00010696	0.00237	0.00383	0.0011	0.00354	0.111	0.11	0.115	0.092	0.086	0.071	0.062	0.084	0.083	0.104	0.0400432	0.0389416	0.0508663	-0.0042255	0.0299926	-0.00346942	0.088034	0.105006	0.0305217	0.0783906
6583.79	0.00186	0.00198	0.00254	-0.000244498	0.000968188	-0.000175327	0.00239	0.00402	0.00114	0.00376	0.111	0.11	0.115	0.092	0.086	0.071	0.062	0.084	0.083	0.104	0.0385908	0.041454	0.0508663	-0.00612042	0.0259272	-0.00568702	0.0887769	0.110215	0.0316316	0.0832623
6585.71	0.00166	0.00198	0.0027	-0.000396788	0.000886679	-0.000336468	0.00245	0.00412	0.00111	0.00411	0.111	0.11	0.115	0.092	0.086	0.071	0.062	0.084	0.083	0.104	0.0344413	0.041454	0.0540704	-0.00993264	0.0237444	-0.0109139	0.0910056	0.112957	0.0307992	0.0910128
6587.64	0.00155	0.00182	0.00284	-0.000341386	0.000975281	-0.000411496	0.0024	0.00419	0.00111	0.00432	0.111	0.11	0.115	0.092	0.086	0.071	0.062	0.084	0.083	0.104	0.032159	0.0381042	0.0568741	-0.00854578	0.0261171	-0.0133475	0.0891484	0.114876	0.0307992	0.0956631
6589.57	0.0017	0.00164	0.00289	-0.000119954	0.00108	-0.000360176	0.00228	0.00424	0.00105	0.00433	0.111	0.11	0.115	0.092	0.086	0.071	0.062	0.084	0.083	0.104	0.0352712	0.0343356	0.0578754	-0.00300276	0.0289214	-0.0116829	0.084691	0.116247	0.0291343	0.0958845
6591.5	0.00197	0.00159	0.00282	-6.06179e-05	0.00128	-0.000299752	0.00233	0.0042	0.000874668	0.00425	0.111	0.11	0.115	0.092	0.086	0.071	0.062	0.084	0.083	0.104	0.0408731	0.0332888	0.0564736	-0.00151742	0.0342772	-0.00972294	0.0865482	0.11515	0.0242694	0.094113
6593.43	0.00212	0.00167	0.00276	-0.000341177	0.00159	-0.00024879	0.00251	0.00416	0.000881985	0.00417	0.111	0.11	0.115	0.092	0.086	0.071	0.062	0.084	0.083	0.104	0.0439852	0.0349637	0.055272	-0.00854055	0.0425787	-0.00806991	0.0932344	0.114053	0.0244724	0.0923414
6595.36	0.00205	0.00188	0.00279	-0.000613153	0.00172	-0.000191763	0.00263	0.00423	0.00121	0.00416	0.111	0.11	0.115	0.092	0.086	0.071	0.062	0.084	0.083	0.104	0.0425329	0.0393604	0.0558728	-0.0153488	0.04606	-0.00622014	0.0976918	0.115973	0.0335739	0.09212
6597.28	0.00186	0.00212	0.00288	-0.000544906	0.00158	-0.000210285	0.00268	0.00429	0.00162	0.00409	0.111	0.11	0.115	0.092	0.086	0.071	0.062	0.084	0.083	0.104	0.0385908	0.0443851	0.0576751	-0.0136404	0.0423109	-0.00682093	0.099549	0.117617	0.0449501	0.0905699
6599.21	0.00176	0.0022	0.0029	-0.000303179	0.00133	-0.000353545	0.00257	0.00427	0.00179	0.00404	0.111	0.11	0.115	0.092	0.086	0.071	0.062	0.084	0.083	0.104	0.036516	0.04606	0.0580757	-0.00758936	0.0356162	-0.0114678	0.0954631	0.117069	0.0496671	0.0894627
6601.14	0.0018	0.0019	0.00292	-9.95398e-06	0.00113	-0.000508785	0.00235	0.00425	0.00174	0.00436	0.111	0.11	0.115	0.092	0.086	0.071	0.062	0.084	0.083	0.104	0.0373459	0.0397791	0.0584762	-0.000249174	0.0302603	-0.0165033	0.0872911	0.116521	0.0482798	0.0965488
6603.07	0.00188	0.00153	0.0031	0.000195026	0.00108	-0.000468642	0.00223	0.00428	0.00159	0.00475	0.111	0.11	0.115	0.092	0.086	0.071	0.062	0.084	0.083	0.104	0.0390058	0.0320326	0.0620809	0.00488201	0.0289214	-0.0152012	0.0828337	0.117343	0.0441177	0.105185
6605	0.0019	0.00163	0.00341	3.18289e-05	0.00115	-0.000237137	0.00235	0.0043	0.00137	0.00466	0.111	0.11	0.115	0.092	0.086	0.071	0.062	0.084	0.083	0.104	0.0394207	0.0341263	0.068289	0.00079676	0.0307959	-0.00769192	0.0872911	0.117892	0.0380134	0.103192
6606.93	0.00196	0.0021	0.0036	-0.000187218	0.00132	-7.78437e-05	0.00259	0.00428	0.00114	0.00427	0.111	0.11	0.115	0.092	0.086	0.071	0.062	0.084	0.083	0.104	0.0406656	0.0439664	0.0720939	-0.00468655	0.0353484	-0.00252499	0.096206	0.117343	0.0316316	0.0945559
6608.85	0.00198	0.00245	0.00357	-5.03361e-05	0.00144	-0.000104398	0.00269	0.00448	0.00102	0.00413	0.111	0.11	0.115	0.092	0.086	0.071	0.062	0.084	0.083	0.104	0.0410805	0.0512941	0.0714931	-0.00126004	0.0385619	-0.00338632	0.0999205	0.122827	0.0283019	0.0914557
6610.78	0.00182	0.0026	0.00336	0.00015077	0.00133	-0.000143305	0.0025	0.00496	0.00108	0.00434	0.111	0.11	0.115	0.092	0.086	0.071	0.062	0.084	0.083	0.104	0.0377609	0.0544345	0.0672877	0.00377417	0.0356162	-0.00464833	0.0928629	0.135987	0.0299667	0.096106
6612.71	0.00175	0.00269	0.00306	0.000138253	0.00108	-2.84761e-05	0.00233	0.00528	0.00119	0.00457	0.111	0.11	0.115	0.092	0.086	0.071	0.062	0.084	0.083	0.104	0.0363086	0.0563188	0.0612798	0.00346083	0.0289214	-0.000923668	0.0865482	0.14476	0.0330189	0.101199
6614.64	0.002	0.00267	0.00296	0.000179708	0.000938579	0.000142127	0.00249	0.00517	0.0013	0.00458	0.111	0.11	0.115	0.092	0.086	0.071	0.062	0.084	0.083	0.104	0.0414955	0.0559001	0.0592772	0.00449856	0.0251343	0.00461012	0.0924915	0.141744	0.0360711	0.101421
6616.57	0.00224	0.00263	0.00318	0.000498056	0.000952989	0.000214994	0.00279	0.00492	0.00143	0.00445	0.111	0.11	0.115	0.092	0.086	0.071	0.062	0.084	0.083	0.104	0.046475	0.0550626	0.063683	0.0124676	0.0255202	0.00697368	0.103635	0.13489	0.0396782	0.0985418
6618.5	0.00213	0.00274	0.00345	0.000871897	0.000977308	0.000280529	0.00293	0.00477	0.00157	0.00429	0.111	0.11	0.115	0.092	0.086	0.071	0.062	0.084	0.083	0.104	0.0441927	0.0573656	0.06909	0.0218259	0.0261714	0.00909941	0.108835	0.130777	0.0435628	0.0949987
6620.43	0.00191	0.00287	0.00339	0.000928581	0.000978857	0.000402242	0.0029	0.00478	0.00163	0.00422	0.111	0.11	0.115	0.092	0.086	0.071	0.062	0.084	0.083	0.104	0.0396282	0.0600874	0.0678884	0.0232448	0.0262129	0.0130474	0.107721	0.131052	0.0452276	0.0934487
6622.35	0.00189	0.00293	0.0031	0.000643134	0.00113	0.00053075	0.0029	0.00496	0.00152	0.00428	0.111	0.11	0.115	0.092	0.086	0.071	0.062	0.084	0.083	0.104	0.0392132	0.0613435	0.0620809	0.0160993	0.0302603	0.0172157	0.107721	0.135987	0.0421754	0.0947773
6624.28	0.00204	0.00287	0.00294	0.000374228	0.00139	0.000746816	0.00308	0.00524	0.00134	0.00429	0.111	0.11	0.115	0.092	0.086	0.071	0.062	0.084	0.083	0.104	0.0423254	0.0600874	0.0588767	0.0093679	0.0372229	0.0242242	0.114407	0.143663	0.037181	0.0949987
6626.21	0.00221	0.00264	0.00312	0.000403434	0.00147	0.000919133	0.00334	0.00542	0.00123	0.00418	0.111	0.11	0.115	0.092	0.086	0.071	0.062	0.084	0.083	0.104	0.0458525	0.055272	0.0624814	0.010099	0.0393652	0.0298136	0.124065	0.148598	0.0341288	0.0925629
6628.14	0.0023	0.00236	0.00346	0.000590712	0.00142	0.000804037	0.00343	0.00539	0.00119	0.00412	0.111	0.11	0.115	0.092	0.086	0.071	0.062	0.084	0.083	0.104	0.0477198	0.0494098	0.0692903	0.0147871	0.0380263	0.0260802	0.127408	0.147776	0.0330189	0.0912342
6630.07	0.00248	0.00224	0.00365	0.000652224	0.00146	0.000532121	0.00338	0.00538	0.00121	0.00425	0.111	0.11	0.115	0.092	0.086	0.071	0.062	0.084	0.083	0.104	0.0514544	0.0468975	0.0730952	0.0163269	0.0390974	0.0172602	0.125551	0.147502	0.0335739	0.094113
6632	0.0028	0.00233	0.00363	0.000589311	0.00157	0.000383377	0.00335	0.00543	0.00128	0.00461	0.111	0.11	0.115	0.092	0.086	0.071	0.062	0.084	0.083	0.104	0.0580937	0.0487817	0.0726947	0.014752	0.0420431	0.0124355	0.124436	0.148872	0.0355161	0.102085
6633.93	0.00291	0.00256	0.00364	0.00052774	0.00147	0.000332236	0.00325	0.00542	0.00136	0.00498	0.111	0.11	0.115	0.092	0.086	0.071	0.062	0.084	0.083	0.104	0.0603759	0.0535971	0.072895	0.0132107	0.0393652	0.0107766	0.120722	0.148598	0.0377359	0.110278
6635.85	0.00261	0.00276	0.00379	0.000403315	0.00116	0.000212044	0.0031	0.00537	0.00137	0.00516	0.111	0.11	0.115	0.092	0.086	0.071	0.062	0.084	0.083	0.104	0.0541516	0.0577844	0.0758989	0.010096	0.0310637	0.00687799	0.11515	0.147227	0.0380134	0.114264
6637.78	0.0023	0.00283	0.00396	0.00023663	0.001	0.000166506	0.00312	0.00536	0.00138	0.00525	0.111	0.11	0.115	0.092	0.086	0.071	0.062	0.084	0.083	0.104	0.0477198	0.0592499	0.0793033	0.00592347	0.0267791	0.00540089	0.115893	0.146953	0.0382908	0.116257
6639.71	0.00233	0.00286	0.0041	0.000178129	0.00111	0.000270009	0.00331	0.00542	0.00146	0.00533	0.111	0.11	0.115	0.092	0.086	0.071	0.062	0.084	0.083	0.104	0.0483423	0.059878	0.082107	0.00445903	0.0297248	0.00875818	0.12295	0.148598	0.0405106	0.118029
6641.64	0.00252	0.00304	0.00413	0.000180304	0.00127	0.000249177	0.00342	0.0055	0.00153	0.00527	0.111	0.11	0.115	0.092	0.086	0.071	0.062	0.084	0.083	0.104	0.0522843	0.0636465	0.0827077	0.00451348	0.0340094	0.00808246	0.127036	0.150792	0.0424529	0.1167
6643.57	0.00251	0.00321	0.00397	0.00019902	0.00133	8.84831e-05	0.00333	0.00554	0.00144	0.00511	0.111	0.11	0.115	0.092	0.086	0.071	0.062	0.084	0.083	0.104	0.0520768	0.0672057	0.0795036	0.00498199	0.0356162	0.00287009	0.123693	0.151888	0.0399557	0.113157
6645.5	0.00232	0.00324	0.00394	0.00037089	0.00131	0.000146717	0.00321	0.00549	0.0013	0.00499	0.111	0.11	0.115	0.092	0.086	0.071	0.062	0.084	0.083	0.104	0.0481348	0.0678338	0.0789028	0.00928434	0.0350806	0.004759	0.119236	0.150517	0.0360711	0.1105
6647.43	0.00236	0.00329	0.00416	0.000577927	0.00131	0.000490099	0.00313	0.00534	0.00117	0.00488	0.111	0.11	0.115	0.092	0.086	0.071	0.062	0.084	0.083	0.104	0.0489647	0.0688806	0.0833085	0.014467	0.0350806	0.0158972	0.116264	0.146405	0.032464	0.108064
6649.35	0.00274	0.00335	0.00437	0.000556767	0.00132	0.000735313	0.00306	0.00534	0.000998288	0.00482	0.111	0.11	0.115	0.092	0.086	0.071	0.062	0.084	0.083	0.104	0.0568488	0.0701368	0.087514	0.0139373	0.0353484	0.0238511	0.113664	0.146405	0.0276995	0.106735
6651.28	0.00306	0.00321	0.0045	0.000632495	0.00134	0.000813574	0.00305	0.00555	0.000955313	0.00487	0.111	0.11	0.115	0.092	0.086	0.071	0.062	0.084	0.083	0.104	0.0634881	0.0672057	0.0901174	0.015833	0.035884	0.0263896	0.113293	0.152163	0.0265071	0.107842
6653.21	0.00307	0.00299	0.00457	0.00109	0.0014	0.00092411	0.00304	0.00572	0.00102	0.00493	0.111	0.11	0.115	0.092	0.086	0.071	0.062	0.084	0.083	0.104	0.0636956	0.0625997	0.0915192	0.0272855	0.0374907	0.029975	0.112921	0.156823	0.0283019	0.109171
6655.14	0.00297	0.0029	0.00441	0.0014	0.00153	0.000935137	0.00297	0.00582	0.000930861	0.00492	0.111	0.11	0.115	0.092	0.086	0.071	0.062	0.084	0.083	0.104	0.0616208	0.0607155	0.088315	0.0350457	0.040972	0.0303327	0.110321	0.159565	0.0258286	0.10895
6657.07	0.00293	0.00298	0.00417	0.00119	0.00163	0.000765651	0.00304	0.00596	0.000911817	0.00485	0.111	0.11	0.115	0.092	0.086	0.071	0.062	0.084	0.083	0.104	0.0607909	0.0623904	0.0835088	0.0297888	0.0436499	0.0248351	0.112921	0.163403	0.0253002	0.1074
6659	0.00296	0.00318	0.00413	0.000714898	0.00169	0.000640839	0.00331	0.00621	0.0012	0.00476	0.111	0.11	0.115	0.092	0.086	0.071	0.062	0.084	0.083	0.104	0.0614133	0.0665776	0.0827077	0.0178958	0.0452566	0.0207867	0.12295	0.170258	0.0332964	0.105407
6660.92	0.00309	0.0033	0.00426	0.000402182	0.0018	0.000617623	0.00338	0.0065	0.00137	0.00472	0.111	0.11	0.115	0.092	0.086	0.071	0.062	0.084	0.083	0.104	0.0641105	0.06909	0.0853111	0.0100677	0.0482023	0.0200336	0.125551	0.178208	0.0380134	0.104521
6662.85	0.00313	0.00322	0.00457	0.000514746	0.00186	0.000563949	0.00319	0.0067	0.00119	0.00481	0.111	0.11	0.115	0.092	0.086	0.071	0.062	0.084	0.083	0.104	0.0649405	0.0674151	0.0915192	0.0128854	0.0498091	0.0182926	0.118493	0.183692	0.0330189	0.106514
6664.78	0.003	0.00312	0.00484	0.000962675	0.00169	0.000464797	0.00317	0.0067	0.00105	0.005	0.111	0.11	0.115	0.092	0.086	0.071	0.062	0.084	0.083	0.104	0.0622432	0.0653215	0.0969263	0.0240983	0.0452566	0.0150764	0.11775	0.183692	0.0291343	0.110721
6666.71	0.00301	0.00328	0.00487	0.0013	0.00148	0.000434488	0.00339	0.00663	0.00114	0.00511	0.111	0.11	0.115	0.092	0.086	0.071	0.062	0.084	0.083	0.104	0.0624507	0.0686713	0.097527	0.0325424	0.039633	0.0140933	0.125922	0.181772	0.0316316	0.113157
6668.64	0.00338	0.00363	0.00485	0.00116	0.00151	0.000460863	0.00363	0.00676	0.00121	0.00509	0.111	0.11	0.115	0.092	0.086	0.071	0.062	0.084	0.083	0.104	0.0701274	0.075999	0.0971265	0.0290378	0.0404364	0.0149488	0.134837	0.185337	0.0335739	0.112714
6670.57	0.00376	0.00377	0.0049	0.000718266	0.00171	0.000488311	0.00382	0.00697	0.00119	0.0052	0.111	0.11	0.115	0.092	0.086	0.071	0.062	0.084	0.083	0.104	0.0780115	0.0789301	0.0981278	0.0179801	0.0457922	0.0158392	0.141895	0.191094	0.0330189	0.11515
6672.49	0.00382	0.00368	0.00504	0.000509858	0.00179	0.000660509	0.00381	0.00696	0.00129	0.00554	0.111	0.11	0.115	0.092	0.086	0.071	0.062	0.084	0.083	0.104	0.0792564	0.0770458	0.100931	0.0127631	0.0479345	0.0214247	0.141523	0.19082	0.0357936	0.122679
6674.42	0.00369	0.00362	0.00528	0.000602931	0.00171	0.00102	0.00367	0.00685	0.0015	0.00573	0.111	0.11	0.115	0.092	0.086	0.071	0.062	0.084	0.083	0.104	0.0765592	0.0757896	0.105738	0.0150929	0.0457922	0.0330854	0.136323	0.187804	0.0416205	0.126886
6676.35	0.00359	0.00359	0.0054	0.000699997	0.00167	0.00131	0.0037	0.0069	0.00154	0.00542	0.111	0.11	0.115	0.092	0.086	0.071	0.062	0.084	0.083	0.104	0.0744844	0.0751615	0.108141	0.0175228	0.044721	0.042492	0.137437	0.189175	0.0427304	0.120022
6678.28	0.00344	0.00342	0.00518	0.000785619	0.00166	0.00131	0.00389	0.00716	0.00133	0.00488	0.111	0.11	0.115	0.092	0.086	0.071	0.062	0.084	0.083	0.104	0.0713723	0.0716024	0.103735	0.0196661	0.0444533	0.042492	0.144495	0.196303	0.0369035	0.108064
6680.21	0.00312	0.0033	0.00492	0.000731766	0.00162	0.00109	0.00403	0.0075	0.00118	0.0046	0.111	0.11	0.115	0.092	0.086	0.071	0.062	0.084	0.083	0.104	0.064733	0.06909	0.0985283	0.018318	0.0433821	0.0353559	0.149695	0.205625	0.0327414	0.101863
6682.14	0.00299	0.00338	0.00501	0.000614583	0.00154	0.000711352	0.00405	0.00772	0.00132	0.00468	0.111	0.11	0.115	0.092	0.086	0.071	0.062	0.084	0.083	0.104	0.0620358	0.0707649	0.100331	0.0153846	0.0412398	0.0230739	0.150438	0.211657	0.036626	0.103635
6684.07	0.00323	0.00346	0.00519	0.000908434	0.00144	0.00038293	0.00402	0.00774	0.00153	0.00488	0.111	0.11	0.115	0.092	0.086	0.071	0.062	0.084	0.083	0.104	0.0670152	0.0724398	0.103935	0.0227405	0.0385619	0.012421	0.149324	0.212205	0.0424529	0.108064
6685.99	0.00355	0.00354	0.00509	0.00143	0.00143	0.00034374	0.00397	0.00763	0.00167	0.00498	0.111	0.11	0.115	0.092	0.086	0.071	0.062	0.084	0.083	0.104	0.0736545	0.0741147	0.101933	0.0357966	0.0382941	0.0111498	0.147466	0.209189	0.0463375	0.110278
6687.92	0.00363	0.00364	0.00493	0.00164	0.00154	0.000500828	0.00391	0.00747	0.00179	0.00503	0.111	0.11	0.115	0.092	0.086	0.071	0.062	0.084	0.083	0.104	0.0753143	0.0762084	0.0987286	0.0410535	0.0412398	0.0162452	0.145238	0.204802	0.0496671	0.111385
6689.85	0.00354	0.00369	0.00518	0.00147	0.00148	0.000670135	0.00401	0.00747	0.00181	0.00513	0.111	0.11	0.115	0.092	0.086	0.071	0.062	0.084	0.083	0.104	0.073447	0.0772552	0.103735	0.0367979	0.039633	0.0217369	0.148952	0.204802	0.050222	0.1136
6691.78	0.00348	0.00366	0.00574	0.00106	0.00133	0.000820011	0.00418	0.00777	0.00168	0.00525	0.111	0.11	0.115	0.092	0.086	0.071	0.062	0.084	0.083	0.104	0.0722022	0.0766271	0.11495	0.0265346	0.0356162	0.0265984	0.155267	0.213027	0.0466149	0.116257
6693.71	0.00357	0.0036	0.00604	0.000727862	0.00139	0.00106	0.00414	0.00809	0.00156	0.00539	0.111	0.11	0.115	0.092	0.086	0.071	0.062	0.084	0.083	0.104	0.0740695	0.0753709	0.120958	0.0182203	0.0372229	0.0343828	0.153781	0.221801	0.0432853	0.119357
6695.64	0.00375	0.00348	0.00588	0.000759691	0.0016	0.00144	0.00401	0.00823	0.00152	0.00555	0.111	0.11	0.115	0.092	0.086	0.071	0.062	0.084	0.083	0.104	0.0778041	0.0728585	0.117753	0.019017	0.0428465	0.0467087	0.148952	0.225639	0.0421754	0.1229
6697.56	0.00395	0.00346	0.00553	0.000854015	0.00182	0.00167	0.00405	0.00845	0.00151	0.0057	0.111	0.11	0.115	0.092	0.086	0.071	0.062	0.084	0.083	0.104	0.0819536	0.0724398	0.110744	0.0213782	0.0487379	0.0541692	0.150438	0.231671	0.041898	0.126222
6699.49	0.00413	0.00377	0.00523	0.000728786	0.00203	0.00153	0.00416	0.00879	0.00152	0.00586	0.111	0.11	0.115	0.092	0.086	0.071	0.062	0.084	0.083	0.104	0.0856882	0.0789301	0.104736	0.0182434	0.0543615	0.049628	0.154524	0.240992	0.0421754	0.129765
6701.42	0.00417	0.00423	0.00514	0.000603318	0.00214	0.00117	0.00417	0.00899	0.00146	0.00599	0.111	0.11	0.115	0.092	0.086	0.071	0.062	0.084	0.083	0.104	0.0865181	0.0885608	0.102934	0.0151026	0.0573072	0.0379508	0.154895	0.246476	0.0405106	0.132644
6703.35	0.00406	0.00447	0.00538	0.00066328	0.00211	0.00101	0.00407	0.00905	0.00148	0.0059	0.111	0.11	0.115	0.092	0.086	0.071	0.062	0.084	0.083	0.104	0.0842359	0.0935855	0.10774	0.0166036	0.0565038	0.032761	0.151181	0.248121	0.0410655	0.130651
6705.28	0.00412	0.00442	0.00576	0.000787497	0.00203	0.00118	0.00395	0.00917	0.00175	0.00556	0.111	0.11	0.115	0.092	0.086	0.071	0.062	0.084	0.083	0.104	0.0854807	0.0925387	0.11535	0.0197131	0.0543615	0.0382752	0.146723	0.251411	0.0485572	0.123122
6707.21	0.00436	0.00435	0.00596	0.000865191	0.0021	0.00124	0.00391	0.00935	0.00208	0.00524	0.111	0.11	0.115	0.092	0.086	0.071	0.062	0.084	0.083	0.104	0.0904602	0.0910732	0.119355	0.021658	0.056236	0.0402214	0.145238	0.256346	0.0577137	0.116036
6709.14	0.00453	0.00449	0.00603	0.000964969	0.0023	0.000999331	0.00405	0.00944	0.00226	0.00526	0.111	0.11	0.115	0.092	0.086	0.071	0.062	0.084	0.083	0.104	0.0939873	0.0940043	0.120757	0.0241557	0.0615919	0.0324149	0.150438	0.258813	0.0627082	0.116479
6711.06	0.0046	0.00469	0.00613	0.00104	0.00239	0.000952512	0.00431	0.0093	0.0023	0.00552	0.111	0.11	0.115	0.092	0.086	0.071	0.062	0.084	0.083	0.104	0.0954396	0.0981915	0.12276	0.0260339	0.064002	0.0308963	0.160096	0.254975	0.0638181	0.122236
6712.99	0.00474	0.00483	0.00619	0.000937313	0.00216	0.00116	0.00444	0.00909	0.00229	0.00576	0.111	0.11	0.115	0.092	0.086	0.071	0.062	0.084	0.083	0.104	0.0983443	0.101123	0.123961	0.0234634	0.0578428	0.0376265	0.164925	0.249218	0.0635406	0.127551
6714.92	0.00487	0.00495	0.00618	0.000738263	0.00175	0.00124	0.00433	0.00905	0.0023	0.00588	0.111	0.11	0.115	0.092	0.086	0.071	0.062	0.084	0.083	0.104	0.101042	0.103635	0.123761	0.0184806	0.0468634	0.0402214	0.160839	0.248121	0.0638181	0.130208
6716.85	0.00484	0.00505	0.00635	0.000784486	0.00166	0.00119	0.00408	0.00924	0.00226	0.00591	0.111	0.11	0.115	0.092	0.086	0.071	0.062	0.084	0.083	0.104	0.100419	0.105729	0.127166	0.0196377	0.0444533	0.0385996	0.151552	0.25333	0.0627082	0.130872
6718.78	0.00484	0.00505	0.00668	0.00112	0.0021	0.00123	0.00393	0.00962	0.00211	0.006	0.111	0.11	0.115	0.092	0.086	0.071	0.062	0.084	0.083	0.104	0.100419	0.105729	0.133774	0.0280365	0.056236	0.039897	0.14598	0.263748	0.0585461	0.132865
6720.71	0.00497	0.0049	0.0068	0.00142	0.00262	0.00134	0.00413	0.00994	0.00201	0.00607	0.111	0.11	0.115	0.092	0.086	0.071	0.062	0.084	0.083	0.104	0.103116	0.102588	0.136177	0.0355463	0.0701612	0.0434651	0.15341	0.272522	0.0557714	0.134415
6722.64	0.00498	0.00471	0.00665	0.00156	0.00288	0.0014	0.00446	0.00998	0.00209	0.00598	0.111	0.11	0.115	0.092	0.086	0.071	0.062	0.084	0.083	0.104	0.103324	0.0986103	0.133173	0.0390509	0.0771237	0.0454113	0.165667	0.273618	0.0579912	0.132422
6724.56	0.00495	0.00457	0.00652	0.00161	0.00284	0.00139	0.00452	0.0099	0.00224	0.00585	0.111	0.11	0.115	0.092	0.086	0.071	0.062	0.084	0.083	0.104	0.102701	0.0956792	0.13057	0.0403025	0.0760526	0.0450869	0.167896	0.271425	0.0621533	0.129544
6726.49	0.00509	0.00458	0.00665	0.00164	0.00263	0.00131	0.00435	0.00994	0.00219	0.00593	0.111	0.11	0.115	0.092	0.086	0.071	0.062	0.084	0.083	0.104	0.105606	0.0958885	0.133173	0.0410535	0.070429	0.042492	0.161581	0.272522	0.0607659	0.131315
6728.42	0.00533	0.00478	0.00702	0.00175	0.00241	0.00116	0.00425	0.01002	0.0019	0.0062	0.111	0.11	0.115	0.092	0.086	0.071	0.062	0.084	0.083	0.104	0.110585	0.100076	0.140583	0.0438071	0.0645376	0.0376265	0.157867	0.274715	0.0527193	0.137294
6730.35	0.00552	0.0049	0.00736	0.00187	0.00228	0.00122	0.00443	0.01009	0.00166	0.0064	0.111	0.11	0.115	0.092	0.086	0.071	0.062	0.084	0.083	0.104	0.114528	0.102588	0.147392	0.046811	0.0610563	0.0395727	0.164553	0.276634	0.04606	0.141723
6732.28	0.00556	0.00472	0.00747	0.00169	0.00219	0.00156	0.00471	0.01026	0.00166	0.00637	0.111	0.11	0.115	0.092	0.086	0.071	0.062	0.084	0.083	0.104	0.115357	0.0988196	0.149595	0.0423051	0.0586462	0.0506011	0.174954	0.281295	0.04606	0.141059
6734.21	0.00532	0.0046	0.00744	0.00137	0.00223	0.00176	0.0047	0.01049	0.0017	0.00625	0.111	0.11	0.115	0.092	0.086	0.071	0.062	0.084	0.083	0.104	0.110378	0.0963073	0.148994	0.0342947	0.0597173	0.0570885	0.174582	0.287601	0.0471699	0.138401
6736.13	0.00496	0.00478	0.00733	0.00127	0.00239	0.00156	0.00449	0.0107	0.00171	0.00614	0.111	0.11	0.115	0.092	0.086	0.071	0.062	0.084	0.083	0.104	0.102909	0.100076	0.146791	0.0317914	0.064002	0.0506011	0.166782	0.293358	0.0474473	0.135966
6738.06	0.00486	0.00493	0.00712	0.00135	0.00243	0.00136	0.00442	0.01085	0.0019	0.00609	0.111	0.11	0.115	0.092	0.086	0.071	0.062	0.084	0.083	0.104	0.100834	0.103216	0.142586	0.033794	0.0650731	0.0441138	0.164182	0.297471	0.0527193	0.134858
6739.99	0.00512	0.00494	0.00714	0.00141	0.00219	0.00142	0.00456	0.01096	0.00222	0.0062	0.111	0.11	0.115	0.092	0.086	0.071	0.062	0.084	0.083	0.104	0.106228	0.103426	0.142986	0.035296	0.0586462	0.04606	0.169382	0.300487	0.0615983	0.137294
6741.92	0.00544	0.0051	0.00747	0.00154	0.00189	0.00157	0.00462	0.01106	0.00243	0.00651	0.111	0.11	0.115	0.092	0.086	0.071	0.062	0.084	0.083	0.104	0.112868	0.106775	0.149595	0.0385502	0.0506124	0.0509255	0.171611	0.303228	0.0674252	0.144159
6743.85	0.00563	0.00544	0.00769	0.00179	0.00194	0.00172	0.0047	0.01127	0.00231	0.00679	0.111	0.11	0.115	0.092	0.086	0.071	0.062	0.084	0.083	0.104	0.11681	0.113894	0.154001	0.0448084	0.0519514	0.055791	0.174582	0.308986	0.0640955	0.150359
6745.78	0.00567	0.00563	0.00771	0.00181	0.00235	0.00184	0.00485	0.01157	0.00198	0.00696	0.111	0.11	0.115	0.092	0.086	0.071	0.062	0.084	0.083	0.104	0.11764	0.117872	0.154401	0.045309	0.0629308	0.0596834	0.180154	0.317211	0.054939	0.154124
6747.7	0.00572	0.00547	0.00777	0.00142	0.00275	0.00182	0.0048	0.01178	0.00175	0.00714	0.111	0.11	0.115	0.092	0.086	0.071	0.062	0.084	0.083	0.104	0.118677	0.114522	0.155603	0.0355463	0.0736424	0.0590346	0.178297	0.322968	0.0485572	0.15811
6749.63	0.00591	0.00519	0.00791	0.00118	0.00282	0.0015	0.0046	0.01194	0.00172	0.00725	0.111	0.11	0.115	0.092	0.086	0.071	0.062	0.084	0.083	0.104	0.122619	0.10866	0.158406	0.0295385	0.075517	0.0486549	0.170868	0.327355	0.0477248	0.160546
6751.56	0.00625	0.00518	0.00804	0.0015	0.00256	0.00122	0.00451	0.01222	0.00174	0.00722	0.111	0.11	0.115	0.092	0.086	0.071	0.062	0.084	0.083	0.104	0.129673	0.10845	0.16101	0.0375489	0.0685544	0.0395727	0.167525	0.335032	0.0482798	0.159881
6753.49	0.00653	0.00536	0.00807	0.0019	0.00232	0.00145	0.00454	0.01258	0.00174	0.00703	0.111	0.11	0.115	0.092	0.086	0.071	0.062	0.084	0.083	0.104	0.135483	0.112219	0.161611	0.047562	0.0621274	0.0470331	0.168639	0.344902	0.0482798	0.155674
6755.42	0.00653	0.00546	0.00807	0.00189	0.0023	0.00185	0.00459	0.01293	0.0018	0.00674	0.111	0.11	0.115	0.092	0.086	0.071	0.062	0.084	0.083	0.104	0.135483	0.114313	0.161611	0.0473116	0.0615919	0.0600077	0.170496	0.354498	0.0499446	0.149252
6757.35	0.0064	0.00562	0.00805	0.00184	0.00239	0.00188	0.00469	0.01328	0.00188	0.00661	0.111	0.11	0.115	0.092	0.086	0.071	0.062	0.084	0.083	0.104	0.132786	0.117662	0.16121	0.04606	0.064002	0.0609808	0.174211	0.364093	0.0521643	0.146373
6759.28	0.0063	0.00586	0.00809	0.00204	0.00254	0.0017	0.00491	0.01352	0.00202	0.00673	0.111	0.11	0.115	0.092	0.086	0.071	0.062	0.084	0.083	0.104	0.130711	0.122687	0.162011	0.0510665	0.0680188	0.0551423	0.182383	0.370673	0.0560489	0.149031
6761.2	0.00624	0.00594	0.00825	0.00225	0.00277	0.00165	0.0052	0.01357	0.00215	0.00686	0.111	0.11	0.115	0.092	0.086	0.071	0.062	0.084	0.083	0.104	0.129466	0.124362	0.165215	0.0563234	0.074178	0.0535204	0.193155	0.372044	0.059656	0.151909
6763.13	0.00639	0.00582	0.00853	0.00221	0.00306	0.00175	0.00528	0.01359	0.00221	0.00703	0.111	0.11	0.115	0.092	0.086	0.071	0.062	0.084	0.083	0.104	0.132578	0.12185	0.170823	0.0553221	0.081944	0.0567641	0.196126	0.372592	0.0613208	0.155674
6765.06	0.00678	0.00575	0.0088	0.00204	0.00338	0.00192	0.00503	0.01375	0.00239	0.00737	0.111	0.11	0.115	0.092	0.086	0.071	0.062	0.084	0.083	0.104	0.14067	0.120384	0.17623	0.0510665	0.0905133	0.0622783	0.18684	0.376979	0.0663153	0.163203
6766.99	0.00708	0.00595	0.00894	0.00194	0.00359	0.00215	0.00481	0.01392	0.00273	0.00757	0.111	0.11	0.115	0.092	0.086	0.071	0.062	0.084	0.083	0.104	0.146894	0.124571	0.179033	0.0485633	0.0961369	0.0697387	0.178668	0.38164	0.0757493	0.167632
6768.92	0.00713	0.00618	0.00898	0.00184	0.00355	0.00241	0.00485	0.01392	0.00275	0.00737	0.111	0.11	0.115	0.092	0.086	0.071	0.062	0.084	0.083	0.104	0.147931	0.129387	0.179834	0.04606	0.0950657	0.0781723	0.180154	0.38164	0.0763042	0.163203
6770.85	0.00707	0.00614	0.00885	0.00197	0.00327	0.00245	0.00487	0.01388	0.00222	0.00697	0.111	0.11	0.115	0.092	0.086	0.071	0.062	0.084	0.083	0.104	0.146687	0.128549	0.177231	0.0493142	0.0875676	0.0794697	0.180897	0.380543	0.0615983	0.154345
6772.77	0.00695	0.00615	0.0086	0.00246	0.00285	0.00234	0.00467	0.01391	0.00183	0.00686	0.111	0.11	0.115	0.092	0.086	0.071	0.062	0.084	0.083	0.104	0.144197	0.128759	0.172224	0.0615802	0.0763203	0.0759017	0.173468	0.381366	0.050777	0.151909
6774.7	0.00684	0.00645	0.00863	0.00271	0.00246	0.0024	0.00462	0.01407	0.00206	0.00721	0.111	0.11	0.115	0.092	0.086	0.071	0.062	0.084	0.083	0.104	0.141915	0.13504	0.172825	0.0678384	0.0658765	0.0778479	0.171611	0.385752	0.0571588	0.15966
6776.63	0.00689	0.00671	0.00907	0.00241	0.00227	0.00255	0.0048	0.01447	0.00242	0.00746	0.111	0.11	0.115	0.092	0.086	0.071	0.062	0.084	0.083	0.104	0.142952	0.140483	0.181637	0.0603286	0.0607885	0.0827134	0.178297	0.396719	0.0671477	0.165196
6778.56	0.00719	0.00682	0.00951	0.00206	0.00249	0.00251	0.00498	0.01509	0.00244	0.00728	0.111	0.11	0.115	0.092	0.086	0.071	0.062	0.084	0.083	0.104	0.149176	0.142786	0.190448	0.0515672	0.0666799	0.0814159	0.184983	0.413717	0.0677027	0.16121
6780.49	0.00781	0.0069	0.00969	0.00209	0.00302	0.00242	0.00517	0.01562	0.00244	0.007	0.111	0.11	0.115	0.092	0.086	0.071	0.062	0.084	0.083	0.104	0.16204	0.144461	0.194053	0.0523182	0.0808728	0.0784966	0.19204	0.428248	0.0677027	0.15501
6782.42	0.00857	0.007	0.0097	0.00236	0.0036	0.00252	0.00555	0.0159	0.00268	0.007	0.111	0.11	0.115	0.092	0.086	0.071	0.062	0.084	0.083	0.104	0.177808	0.146555	0.194253	0.059077	0.0964047	0.0817403	0.206156	0.435925	0.0743619	0.15501
6784.35	0.00898	0.00713	0.0097	0.00243	0.0041	0.00269	0.00584	0.01608	0.00289	0.00724	0.111	0.11	0.115	0.092	0.086	0.071	0.062	0.084	0.083	0.104	0.186315	0.149276	0.194253	0.0608292	0.109794	0.0872545	0.216928	0.44086	0.0801888	0.160324
6786.27	0.00885	0.00711	0.00979	0.00212	0.00424	0.00272	0.00573	0.01629	0.00278	0.00754	0.111	0.11	0.115	0.092	0.086	0.071	0.062	0.084	0.083	0.104	0.183618	0.148858	0.196055	0.0530691	0.113543	0.0882276	0.212842	0.446617	0.0771366	0.166967
6788.2	0.00861	0.00704	0.00994	0.00184	0.00391	0.00278	0.00548	0.01652	0.00253	0.00776	0.111	0.11	0.115	0.092	0.086	0.071	0.062	0.084	0.083	0.104	0.178638	0.147392	0.199059	0.04606	0.104706	0.0901738	0.203555	0.452923	0.0701999	0.171839
6790.13	0.00869	0.00712	0.01014	0.00208	0.00362	0.00299	0.0054	0.01663	0.00249	0.00783	0.111	0.11	0.115	0.092	0.086	0.071	0.062	0.084	0.083	0.104	0.180298	0.149067	0.203065	0.0520678	0.0969402	0.0969855	0.200584	0.455939	0.06909	0.173389
6792.06	0.00897	0.0072	0.01043	0.00279	0.00375	0.00311	0.00539	0.01664	0.00263	0.00792	0.111	0.11	0.115	0.092	0.086	0.071	0.062	0.084	0.083	0.104	0.186107	0.150742	0.208872	0.069841	0.100422	0.100878	0.200212	0.456213	0.0729746	0.175382
6793.99	0.0091	0.00712	0.01061	0.00341	0.0039	0.00301	0.0054	0.01662	0.00262	0.00803	0.111	0.11	0.115	0.092	0.086	0.071	0.062	0.084	0.083	0.104	0.188805	0.149067	0.212477	0.0853612	0.104438	0.0976342	0.200584	0.455665	0.0726971	0.177818
6795.92	0.00907	0.007	0.01073	0.00352	0.00361	0.00284	0.00553	0.01659	0.00242	0.00783	0.111	0.11	0.115	0.092	0.086	0.071	0.062	0.084	0.083	0.104	0.188182	0.146555	0.21488	0.0881148	0.0966724	0.09212	0.205413	0.454842	0.0671477	0.173389
6797.85	0.00906	0.00702	0.01105	0.0035	0.00311	0.00277	0.00572	0.01652	0.00241	0.00737	0.111	0.11	0.115	0.092	0.086	0.071	0.062	0.084	0.083	0.104	0.187975	0.146973	0.221288	0.0876141	0.0832829	0.0898494	0.21247	0.452923	0.0668702	0.163203
6799.77	0.00902	0.0072	0.0114	0.00356	0.00288	0.00284	0.00592	0.01643	0.00268	0.00706	0.111	0.11	0.115	0.092	0.086	0.071	0.062	0.084	0.083	0.104	0.187145	0.150742	0.228297	0.0891161	0.0771237	0.09212	0.219899	0.450456	0.0743619	0.156338
6801.7	0.00901	0.00741	0.01159	0.00325	0.00311	0.0028	0.00622	0.01651	0.00291	0.00717	0.111	0.11	0.115	0.092	0.086	0.071	0.062	0.084	0.083	0.104	0.186937	0.155138	0.232102	0.081356	0.0832829	0.0908225	0.231043	0.452649	0.0807437	0.158774
6803.63	0.00914	0.00746	0.01164	0.00279	0.00356	0.00267	0.00649	0.01691	0.00297	0.00756	0.111	0.11	0.115	0.092	0.086	0.071	0.062	0.084	0.083	0.104	0.189634	0.156185	0.233104	0.069841	0.0953335	0.0866058	0.241072	0.463616	0.0824086	0.16741
6805.56	0.00929	0.00742	0.01145	0.00265	0.00386	0.00277	0.00651	0.01726	0.00293	0.0078	0.111	0.11	0.115	0.092	0.086	0.071	0.062	0.084	0.083	0.104	0.192747	0.155348	0.229299	0.0663364	0.103367	0.0898494	0.241815	0.473212	0.0812987	0.172725
6807.49	0.00938	0.00747	0.01106	0.00268	0.00401	0.00299	0.00645	0.01728	0.00283	0.00781	0.111	0.11	0.115	0.092	0.086	0.071	0.062	0.084	0.083	0.104	0.194614	0.156395	0.221489	0.0670874	0.107384	0.0969855	0.239586	0.47376	0.078524	0.172946
6809.42	0.00942	0.00761	0.01086	0.00279	0.004	0.00302	0.00635	0.01729	0.00281	0.00786	0.111	0.11	0.115	0.092	0.086	0.071	0.062	0.084	0.083	0.104	0.195444	0.159326	0.217483	0.069841	0.107116	0.0979586	0.235872	0.474034	0.077969	0.174054
6811.35	0.00945	0.00773	0.01105	0.00301	0.00369	0.00294	0.00603	0.01747	0.00292	0.00809	0.111	0.11	0.115	0.092	0.086	0.071	0.062	0.084	0.083	0.104	0.196066	0.161838	0.221288	0.0753482	0.0988148	0.0953637	0.223985	0.478969	0.0810212	0.179147
6813.27	0.00954	0.00789	0.0113	0.00316	0.00326	0.0029	0.00564	0.01756	0.00298	0.00838	0.111	0.11	0.115	0.092	0.086	0.071	0.062	0.084	0.083	0.104	0.197934	0.165188	0.226295	0.079103	0.0872998	0.0940662	0.209499	0.481437	0.082686	0.185569
6815.2	0.00976	0.00799	0.01136	0.00322	0.003	0.00296	0.00547	0.01754	0.00293	0.00863	0.111	0.11	0.115	0.092	0.086	0.071	0.062	0.084	0.083	0.104	0.202498	0.167282	0.227496	0.080605	0.0803372	0.0960124	0.203184	0.480888	0.0812987	0.191105
6817.13	0.01005	0.00782	0.01143	0.00333	0.00306	0.00307	0.00556	0.01766	0.00286	0.00872	0.111	0.11	0.115	0.092	0.086	0.071	0.062	0.084	0.083	0.104	0.208515	0.163722	0.228898	0.0833586	0.081944	0.0995804	0.206527	0.484178	0.0793564	0.193098
6819.06	0.01028	0.00761	0.01171	0.00342	0.00339	0.00316	0.0058	0.01805	0.00264	0.00848	0.111	0.11	0.115	0.092	0.086	0.071	0.062	0.084	0.083	0.104	0.213287	0.159326	0.234505	0.0856115	0.090781	0.1025	0.215442	0.494871	0.073252	0.187783
6820.99	0.01032	0.00771	0.01202	0.00343	0.00389	0.00331	0.00604	0.01845	0.0024	0.00805	0.111	0.11	0.115	0.092	0.086	0.071	0.062	0.084	0.083	0.104	0.214117	0.161419	0.240714	0.0858618	0.104171	0.107365	0.224357	0.505838	0.0665928	0.178261
6822.92	0.01031	0.00802	0.0121	0.00353	0.00427	0.0034	0.00626	0.01858	0.00253	0.00801	0.111	0.11	0.115	0.092	0.086	0.071	0.062	0.084	0.083	0.104	0.213909	0.16791	0.242316	0.0883651	0.114347	0.110285	0.232529	0.509402	0.0701999	0.177375
6824.84	0.01049	0.00824	0.0118	0.00385	0.00426	0.00327	0.00632	0.01859	0.00284	0.00844	0.111	0.11	0.115	0.092	0.086	0.071	0.062	0.084	0.083	0.104	0.217644	0.172516	0.236308	0.0963755	0.114079	0.106068	0.234757	0.509676	0.0788014	0.186897
6826.77	0.01068	0.00836	0.01137	0.00413	0.00402	0.00314	0.00619	0.01866	0.00294	0.00869	0.111	0.11	0.115	0.092	0.086	0.071	0.062	0.084	0.083	0.104	0.221586	0.175028	0.227697	0.103385	0.107652	0.101851	0.229929	0.511595	0.0815761	0.192433
6828.7	0.01055	0.00848	0.01131	0.00406	0.00383	0.0032	0.00597	0.01873	0.00289	0.00847	0.111	0.11	0.115	0.092	0.086	0.071	0.062	0.084	0.083	0.104	0.218889	0.17754	0.226495	0.101632	0.102564	0.103797	0.221757	0.513514	0.0801888	0.187562
6830.63	0.01019	0.00856	0.0117	0.00381	0.00371	0.00328	0.00593	0.01867	0.00275	0.00815	0.111	0.11	0.115	0.092	0.086	0.071	0.062	0.084	0.083	0.104	0.21142	0.179215	0.234305	0.0953742	0.0993503	0.106392	0.220271	0.511869	0.0763042	0.180475
6832.56	0.00994	0.00872	0.01209	0.00354	0.0036	0.00337	0.00614	0.01867	0.00254	0.00799	0.111	0.11	0.115	0.092	0.086	0.071	0.062	0.084	0.083	0.104	0.206233	0.182565	0.242115	0.0886154	0.0964047	0.109311	0.228071	0.511869	0.0704773	0.176932
6834.49	0.00995	0.00897	0.01228	0.00327	0.00352	0.00351	0.00629	0.01882	0.00246	0.00797	0.111	0.11	0.115	0.092	0.086	0.071	0.062	0.084	0.083	0.104	0.20644	0.187799	0.24592	0.0818566	0.0942623	0.113853	0.233643	0.515982	0.0682576	0.17649
6836.41	0.01022	0.00914	0.0125	0.00323	0.00373	0.00358	0.00628	0.01898	0.00267	0.00803	0.111	0.11	0.115	0.092	0.086	0.071	0.062	0.084	0.083	0.104	0.212042	0.191358	0.250326	0.0808553	0.0998859	0.116123	0.233272	0.520368	0.0740845	0.177818
6838.34	0.01076	0.00922	0.01281	0.00355	0.00429	0.00356	0.00662	0.01915	0.00314	0.00823	0.111	0.11	0.115	0.092	0.086	0.071	0.062	0.084	0.083	0.104	0.223246	0.193033	0.256534	0.0888658	0.114882	0.115474	0.245901	0.525029	0.0871255	0.182247
6840.27	0.01122	0.00912	0.013	0.00392	0.00475	0.00365	0.00726	0.0193	0.00375	0.00855	0.111	0.11	0.115	0.092	0.086	0.071	0.062	0.084	0.083	0.104	0.23279	0.19094	0.260339	0.0981278	0.127201	0.118394	0.269674	0.529142	0.104051	0.189333
6842.2	0.01103	0.00873	0.01287	0.00405	0.00482	0.00395	0.00751	0.01941	0.00422	0.0088	0.111	0.11	0.115	0.092	0.086	0.071	0.062	0.084	0.083	0.104	0.228848	0.182774	0.257736	0.101382	0.129075	0.128125	0.27896	0.532157	0.117092	0.194869
6844.13	0.01028	0.00849	0.01264	0.00401	0.00467	0.00412	0.00711	0.01955	0.00418	0.00893	0.111	0.11	0.115	0.092	0.086	0.071	0.062	0.084	0.083	0.104	0.213287	0.17775	0.25313	0.100381	0.125058	0.133639	0.264102	0.535996	0.115982	0.197748
6846.06	0.0098	0.00864	0.01265	0.00386	0.00434	0.00377	0.0065	0.0196	0.00382	0.00909	0.111	0.11	0.115	0.092	0.086	0.071	0.062	0.084	0.083	0.104	0.203328	0.18089	0.25333	0.0966259	0.116221	0.122286	0.241444	0.537367	0.105993	0.201291
6847.98	0.00992	0.00886	0.01279	0.00367	0.00384	0.00328	0.00628	0.01945	0.00365	0.00918	0.111	0.11	0.115	0.092	0.086	0.071	0.062	0.084	0.083	0.104	0.205818	0.185496	0.256134	0.0918697	0.102832	0.106392	0.233272	0.533254	0.101277	0.203284
6849.91	0.01032	0.00889	0.01286	0.00353	0.0035	0.00323	0.00655	0.01927	0.00354	0.00911	0.111	0.11	0.115	0.092	0.086	0.071	0.062	0.084	0.083	0.104	0.214117	0.186124	0.257535	0.0883651	0.0937267	0.10477	0.243301	0.528319	0.0982243	0.201734
6851.84	0.0107	0.00868	0.01281	0.00353	0.00353	0.00346	0.00682	0.0192	0.00316	0.00904	0.111	0.11	0.115	0.092	0.086	0.071	0.062	0.084	0.083	0.104	0.222001	0.181728	0.256534	0.0883651	0.0945301	0.112231	0.25333	0.5264	0.0876805	0.200184
6853.77	0.01104	0.00827	0.01257	0.00376	0.0037	0.00356	0.00687	0.01916	0.00287	0.00906	0.111	0.11	0.115	0.092	0.086	0.071	0.062	0.084	0.083	0.104	0.229055	0.173144	0.251728	0.0941226	0.0990826	0.115474	0.255187	0.525303	0.0796339	0.200627
6855.7	0.01127	0.00785	0.01238	0.00409	0.00385	0.00359	0.00703	0.01906	0.00297	0.00919	0.111	0.11	0.115	0.092	0.086	0.071	0.062	0.084	0.083	0.104	0.233827	0.16435	0.247923	0.102383	0.103099	0.116447	0.26113	0.522562	0.0824086	0.203505
6857.63	0.01138	0.00786	0.0126	0.0044	0.00403	0.00368	0.00732	0.01885	0.00325	0.00932	0.111	0.11	0.115	0.092	0.086	0.071	0.062	0.084	0.083	0.104	0.236109	0.16456	0.252329	0.110143	0.10792	0.119367	0.271903	0.516804	0.0901777	0.206384
6859.56	0.0116	0.00864	0.0132	0.00471	0.00424	0.00385	0.00738	0.01876	0.00341	0.00929	0.111	0.11	0.115	0.092	0.086	0.071	0.062	0.084	0.083	0.104	0.240674	0.18089	0.264344	0.117904	0.113543	0.124881	0.274131	0.514337	0.0946172	0.20572
6861.48	0.01187	0.0096	0.01367	0.00481	0.00442	0.00402	0.00715	0.0189	0.0034	0.00902	0.111	0.11	0.115	0.092	0.086	0.071	0.062	0.084	0.083	0.104	0.246276	0.200989	0.273757	0.120407	0.118363	0.130395	0.265588	0.518175	0.0943398	0.199741
6863.41	0.0118	0.00995	0.01359	0.00448	0.00453	0.00401	0.00686	0.01898	0.00327	0.00875	0.111	0.11	0.115	0.092	0.086	0.071	0.062	0.084	0.083	0.104	0.244823	0.208317	0.272155	0.112146	0.121309	0.130071	0.254816	0.520368	0.0907327	0.193762
6865.34	0.01136	0.00961	0.01313	0.00389	0.00441	0.00402	0.00661	0.01898	0.0032	0.00875	0.111	0.11	0.115	0.092	0.086	0.071	0.062	0.084	0.083	0.104	0.235694	0.201198	0.262943	0.0973768	0.118096	0.130395	0.24553	0.520368	0.0887904	0.193762
6867.27	0.01099	0.00905	0.01286	0.00358	0.00407	0.00417	0.00651	0.01917	0.00327	0.00896	0.111	0.11	0.115	0.092	0.086	0.071	0.062	0.084	0.083	0.104	0.228018	0.189474	0.257535	0.0896167	0.108991	0.135261	0.241815	0.525577	0.0907327	0.198412
6869.2	0.01103	0.00864	0.01326	0.00378	0.00384	0.00432	0.00661	0.01956	0.00335	0.00905	0.111	0.11	0.115	0.092	0.086	0.071	0.062	0.084	0.083	0.104	0.228848	0.18089	0.265546	0.0946233	0.102832	0.140126	0.24553	0.53627	0.0929524	0.200405
6871.13	0.01142	0.00844	0.01408	0.00417	0.0039	0.0044	0.00667	0.0199	0.00336	0.00891	0.111	0.11	0.115	0.092	0.086	0.071	0.062	0.084	0.083	0.104	0.236939	0.176703	0.281967	0.104386	0.104438	0.142721	0.247758	0.545592	0.0932299	0.197305
6873.06	0.01164	0.00839	0.01459	0.00423	0.004	0.00439	0.00657	0.02022	0.00334	0.00885	0.111	0.11	0.115	0.092	0.086	0.071	0.062	0.084	0.083	0.104	0.241504	0.175656	0.292181	0.105888	0.107116	0.142397	0.244044	0.554365	0.0926749	0.195976
6874.98	0.0116	0.0087	0.01437	0.00404	0.00404	0.00444	0.00644	0.02056	0.00328	0.00899	0.111	0.11	0.115	0.092	0.086	0.071	0.062	0.084	0.083	0.104	0.240674	0.182146	0.287775	0.101132	0.108187	0.144019	0.239215	0.563687	0.0910101	0.199077
6876.91	0.01148	0.00943	0.01374	0.00413	0.00418	0.00461	0.00648	0.02086	0.00329	0.00909	0.111	0.11	0.115	0.092	0.086	0.071	0.062	0.084	0.083	0.104	0.238184	0.19743	0.275158	0.103385	0.111937	0.149533	0.240701	0.571912	0.0912876	0.201291
6878.84	0.01144	0.01007	0.01362	0.00445	0.00438	0.00453	0.00672	0.02113	0.00348	0.00922	0.111	0.11	0.115	0.092	0.086	0.071	0.062	0.084	0.083	0.104	0.237354	0.210829	0.272755	0.111395	0.117292	0.146938	0.249615	0.579314	0.0965595	0.20417
6880.77	0.01169	0.01022	0.01419	0.00445	0.00474	0.00403	0.00693	0.0213	0.0036	0.00952	0.111	0.11	0.115	0.092	0.086	0.071	0.062	0.084	0.083	0.104	0.242541	0.21397	0.28417	0.111395	0.126933	0.13072	0.257416	0.583975	0.0998892	0.210813
6882.7	0.01219	0.01008	0.01467	0.00414	0.00528	0.00362	0.007	0.02141	0.00368	0.00969	0.111	0.11	0.115	0.092	0.086	0.071	0.062	0.084	0.083	0.104	0.252915	0.211039	0.293783	0.103635	0.141393	0.117421	0.260016	0.586991	0.102109	0.214578
6884.63	0.01272	0.00995	0.01481	0.00395	0.0056	0.00371	0.00709	0.02162	0.0039	0.00947	0.111	0.11	0.115	0.092	0.086	0.071	0.062	0.084	0.083	0.104	0.263911	0.208317	0.296586	0.0988788	0.149963	0.12034	0.263359	0.592748	0.108213	0.209706
6886.56	0.01305	0.01002	0.01481	0.00402	0.00554	0.00395	0.00738	0.02182	0.004	0.00912	0.111	0.11	0.115	0.092	0.086	0.071	0.062	0.084	0.083	0.104	0.270758	0.209782	0.296586	0.100631	0.148356	0.128125	0.274131	0.598232	0.110988	0.201955
6888.48	0.01318	0.01025	0.01466	0.0043	0.00536	0.00401	0.00767	0.02179	0.00383	0.00906	0.111	0.11	0.115	0.092	0.086	0.071	0.062	0.084	0.083	0.104	0.273455	0.214598	0.293582	0.10764	0.143536	0.130071	0.284903	0.597409	0.106271	0.200627
6890.41	0.01333	0.01046	0.01458	0.00467	0.00547	0.0041	0.00777	0.02187	0.00382	0.00941	0.111	0.11	0.115	0.092	0.086	0.071	0.062	0.084	0.083	0.104	0.276567	0.218994	0.29198	0.116902	0.146482	0.13299	0.288618	0.599602	0.105993	0.208377
6892.34	0.01373	0.01069	0.01502	0.00506	0.00597	0.00439	0.00794	0.02257	0.00416	0.0102	0.111	0.11	0.115	0.092	0.086	0.071	0.062	0.084	0.083	0.104	0.284867	0.22381	0.300792	0.126665	0.159871	0.142397	0.294933	0.618794	0.115427	0.225871
6894.27	0.01403	0.01095	0.01587	0.00523	0.00631	0.00454	0.00808	0.02346	0.00437	0.011	0.111	0.11	0.115	0.092	0.086	0.071	0.062	0.084	0.083	0.104	0.291091	0.229253	0.317814	0.130921	0.168976	0.147262	0.300133	0.643195	0.121254	0.243587
6896.2	0.01374	0.01094	0.01635	0.00493	0.00596	0.00447	0.0077	0.02363	0.00412	0.01103	0.111	0.11	0.115	0.092	0.086	0.071	0.062	0.084	0.083	0.104	0.285074	0.229044	0.327427	0.123411	0.159603	0.144992	0.286018	0.647856	0.114318	0.244251
6898.12	0.0132	0.01053	0.01608	0.00462	0.00534	0.00451	0.00708	0.02329	0.00379	0.0104	0.111	0.11	0.115	0.092	0.086	0.071	0.062	0.084	0.083	0.104	0.27387	0.22046	0.322019	0.115651	0.143	0.146289	0.262988	0.638534	0.105161	0.2303
6900.05	0.01308	0.01014	0.01545	0.00486	0.00514	0.00477	0.00677	0.02324	0.00371	0.00991	0.111	0.11	0.115	0.092	0.086	0.071	0.062	0.084	0.083	0.104	0.271381	0.212295	0.309403	0.121658	0.137644	0.154723	0.251473	0.637163	0.102941	0.219449
6901.98	0.01343	0.01019	0.01505	0.00533	0.00534	0.00511	0.00672	0.02369	0.00377	0.00983	0.111	0.11	0.115	0.092	0.086	0.071	0.062	0.084	0.083	0.104	0.278642	0.213342	0.301393	0.133424	0.143	0.165751	0.249615	0.649501	0.104606	0.217678
6903.91	0.01395	0.01058	0.01525	0.00536	0.00549	0.00516	0.00678	0.02439	0.00381	0.01	0.111	0.11	0.115	0.092	0.086	0.071	0.062	0.084	0.083	0.104	0.289431	0.221507	0.305398	0.134175	0.147017	0.167373	0.251844	0.668692	0.105716	0.221442
6905.84	0.01424	0.01078	0.01583	0.00485	0.00549	0.00485	0.00686	0.02497	0.00386	0.0101	0.111	0.11	0.115	0.092	0.086	0.071	0.062	0.084	0.083	0.104	0.295448	0.225694	0.317013	0.121408	0.147017	0.157318	0.254816	0.684594	0.107103	0.223657
6907.77	0.01408	0.0107	0.01615	0.0043	0.00539	0.00464	0.00696	0.02528	0.00392	0.00983	0.111	0.11	0.115	0.092	0.086	0.071	0.062	0.084	0.083	0.104	0.292128	0.224019	0.323421	0.10764	0.144339	0.150506	0.25853	0.693093	0.108768	0.217678
6909.7	0.01397	0.01061	0.01606	0.00426	0.00524	0.00478	0.00728	0.02546	0.00386	0.00942	0.111	0.11	0.115	0.092	0.086	0.071	0.062	0.084	0.083	0.104	0.289846	0.222135	0.321619	0.106639	0.140322	0.155047	0.270417	0.698028	0.107103	0.208599
6911.62	0.01437	0.01064	0.01601	0.00463	0.00517	0.00505	0.00776	0.02557	0.00366	0.00933	0.111	0.11	0.115	0.092	0.086	0.071	0.062	0.084	0.083	0.104	0.298145	0.222763	0.320618	0.115901	0.138448	0.163805	0.288246	0.701044	0.101554	0.206606
6913.55	0.01485	0.0107	0.0162	0.00499	0.0052	0.00521	0.00807	0.0256	0.00346	0.00959	0.111	0.11	0.115	0.092	0.086	0.071	0.062	0.084	0.083	0.104	0.308104	0.224019	0.324423	0.124913	0.139251	0.168995	0.299761	0.701867	0.0960046	0.212363
6915.48	0.01498	0.01068	0.01635	0.00537	0.00532	0.00525	0.00814	0.02584	0.00345	0.00981	0.111	0.11	0.115	0.092	0.086	0.071	0.062	0.084	0.083	0.104	0.310801	0.2236	0.327427	0.134425	0.142465	0.170292	0.302362	0.708447	0.0957271	0.217235
6917.41	0.01513	0.0108	0.01638	0.00584	0.00559	0.00534	0.00809	0.02638	0.00367	0.00985	0.111	0.11	0.115	0.092	0.086	0.071	0.062	0.084	0.083	0.104	0.313913	0.226113	0.328027	0.14619	0.149695	0.173212	0.300504	0.723252	0.101831	0.218121
6919.34	0.01565	0.01114	0.01662	0.00602	0.00574	0.00557	0.00814	0.02677	0.00392	0.00998	0.111	0.11	0.115	0.092	0.086	0.071	0.062	0.084	0.083	0.104	0.324702	0.233231	0.332834	0.150696	0.153712	0.180672	0.302362	0.733944	0.108768	0.220999
6921.27	0.01616	0.01138	0.01693	0.00585	0.00559	0.006	0.00843	0.02681	0.00397	0.0104	0.111	0.11	0.115	0.092	0.086	0.071	0.062	0.084	0.083	0.104	0.335284	0.238256	0.339042	0.146441	0.149695	0.19462	0.313134	0.735041	0.110156	0.2303
6923.2	0.01617	0.01147	0.01709	0.00583	0.00554	0.00651	0.00872	0.02694	0.00392	0.01091	0.111	0.11	0.115	0.092	0.086	0.071	0.062	0.084	0.083	0.104	0.335491	0.24014	0.342246	0.14594	0.148356	0.211162	0.323906	0.738605	0.108768	0.241594
6925.12	0.01585	0.01164	0.01744	0.00594	0.00574	0.00674	0.00879	0.02722	0.00386	0.01121	0.111	0.11	0.115	0.092	0.086	0.071	0.062	0.084	0.083	0.104	0.328852	0.243699	0.349255	0.148694	0.153712	0.218623	0.326506	0.746282	0.107103	0.248237
6927.05	0.0157	0.01184	0.01825	0.00588	0.00581	0.00644	0.00869	0.02738	0.00381	0.01114	0.111	0.11	0.115	0.092	0.086	0.071	0.062	0.084	0.083	0.104	0.32574	0.247887	0.365476	0.147192	0.155586	0.208892	0.322791	0.750668	0.105716	0.246687
6928.98	0.01589	0.01187	0.01891	0.00588	0.0057	0.00608	0.00856	0.02753	0.00391	0.01088	0.111	0.11	0.115	0.092	0.086	0.071	0.062	0.084	0.083	0.104	0.329682	0.248515	0.378693	0.147192	0.152641	0.197215	0.317963	0.754781	0.108491	0.240929
6930.91	0.01633	0.01201	0.01916	0.00607	0.00573	0.00622	0.00837	0.02783	0.00418	0.01081	0.111	0.11	0.115	0.092	0.086	0.071	0.062	0.084	0.083	0.104	0.338811	0.251446	0.3837	0.151948	0.153444	0.201756	0.310905	0.763006	0.115982	0.239379
6932.84	0.01682	0.01241	0.01941	0.00623	0.0059	0.00671	0.0083	0.02836	0.00449	0.01104	0.111	0.11	0.115	0.092	0.086	0.071	0.062	0.084	0.083	0.104	0.348977	0.25982	0.388706	0.155953	0.157997	0.21765	0.308305	0.777537	0.124584	0.244472
6934.77	0.01706	0.0127	0.01961	0.00623	0.00587	0.00696	0.00859	0.02887	0.00461	0.01131	0.111	0.11	0.115	0.092	0.086	0.071	0.062	0.084	0.083	0.104	0.353957	0.265892	0.392712	0.155953	0.157193	0.225759	0.319077	0.791519	0.127914	0.250451
[truncated: 291 more rows]

## Sheet: Sheet2
0.111	10
0.11	9
0.115	8
0.092	7
0.086	6
0.071	5
0.062	4
0.084	3
0.083	2
0.104	1
